# Supplementary material for: From Cellular Infiltration Assessment to a Functional Gene Set-Based Prognostic Model for Breast Cancer
Source: Frontiers journal article supplement (doi:10.3389/fimmu.2021.751530), 2021-10-04
Supplement: Data_Sheet_1.ZIP [file Data_Sheet_1.ZIP]

## Sheet: sheet1
Table S6. Differential expression genes between high- and low-risk groups.
Gene	logFC	AveExpr	t	P.Value	adj.P.Val	B
IL6ST	-0.518582	1.18462	-16.8561	4.81973e-62	3.05812e-58	130.197
RBM5	-0.234258	0.789555	-16.3418	1.61551e-58	5.12521e-55	122.157
ARHGEF3	-0.262139	0.647898	-15.9652	5.3574e-56	1.13309e-52	116.409
PCM1	-0.322492	0.772321	-15.8965	1.52277e-55	2.4155e-52	115.374
PGK1	0.308855	1.14081	15.7361	1.72259e-54	2.18596e-51	112.972
PSMD7	0.2132	0.571418	15.5904	1.52965e-53	1.6176e-50	110.81
PRDX4	0.262251	1.04457	15.1577	8.99422e-51	8.15262e-48	104.496
HSF1	0.234937	0.000676307	15.0199	6.63382e-50	5.26145e-47	102.519
TCEB1	0.230886	0.200459	14.9372	2.18195e-49	1.53827e-46	101.34
ENY2	0.243145	0.886192	14.7554	2.92581e-48	1.80108e-45	98.7707
MRPL13	0.278974	0.453937	14.7508	3.12244e-48	1.80108e-45	98.7064
KIF13B	-0.361908	0.482672	-14.5985	2.68711e-47	1.42081e-44	96.5762
BTG2	-0.366112	0.839327	-14.5433	5.83039e-47	2.84568e-44	95.8097
CST3	-0.343504	1.75495	-14.5111	9.16226e-47	4.15247e-44	95.3624
KCMF1	0.151427	-0.00107995	14.2987	1.75221e-45	7.41183e-43	92.4425
APRT	0.211664	0.589976	14.0895	3.08308e-44	1.22264e-41	89.6054
BNIP3	0.261849	0.558899	14.0279	7.12166e-44	2.65805e-41	88.7771
ATP5G3	0.18047	0.215711	13.9408	2.31358e-43	8.06695e-41	87.6116
CFDP1	0.187084	0.017499	13.9376	2.41563e-43	8.06695e-41	87.5689
NKTR	-0.219198	0.688291	-13.8356	9.50511e-43	3.0155e-40	86.2139
XPC	-0.136454	0.494716	-13.8024	1.48282e-42	4.48024e-40	85.7741
RCOR3	-0.227273	0.456413	-13.7111	5.00131e-42	1.44242e-39	84.5716
ADM	0.412448	0.0744152	13.677	7.86442e-42	2.16956e-39	84.1239
SCUBE2	-0.803947	0.718297	-13.5366	5.01466e-41	1.29692e-38	82.2918
ADK	0.178797	0.352457	13.5351	5.11e-41	1.29692e-38	82.2732
TRAF5	-0.255962	0.329479	-13.5067	7.41984e-41	1.81073e-38	81.9044
EIF4EBP1	0.288071	-0.108231	13.4955	8.59572e-41	2.01999e-38	81.7589
EIF4B	-0.210726	1.57226	-13.4561	1.4375e-40	3.25748e-38	81.2504
NISCH	-0.173978	0.708295	-13.4097	2.63174e-40	5.75806e-38	80.6524
FAM46C	-0.287168	0.330314	-13.3679	4.53044e-40	9.58187e-38	80.1154
EXOSC4	0.207491	0.129257	13.3537	5.44535e-40	1.11454e-37	79.9335
EP400	-0.159634	0.385386	-13.3434	6.22387e-40	1.23408e-37	79.8014
CALCOCO1	-0.148905	0.101704	-13.3329	7.13358e-40	1.37159e-37	79.6665
IGFBP4	-0.365761	1.7976	-13.2277	2.77011e-39	5.16951e-37	78.3252
MGEA5	-0.158758	1.03225	-13.2017	3.87046e-39	7.0166e-37	77.9945
AMD1	0.265487	0.115775	13.156	6.94342e-39	1.22378e-36	77.4167
PSMD14	0.167009	0.606257	13.1457	7.92643e-39	1.35928e-36	77.2858
MRPL15	0.236615	0.506549	13.1242	1.0422e-38	1.74021e-36	77.0152
MTHFD2	0.244532	0.609773	13.1217	1.07699e-38	1.75219e-36	76.9827
RABEP1	-0.290961	0.622101	-13.0276	3.56121e-38	5.64897e-36	75.8005
DPH2	0.110759	-0.332631	13.0159	4.13053e-38	6.39224e-36	75.6539
NDRG1	0.389464	0.743762	12.962	8.16611e-38	1.23367e-35	74.9802
NAT1	-0.702286	0.542627	-12.8916	1.97822e-37	2.91903e-35	74.1057
TEAD4	0.191785	-0.148795	12.8323	4.16081e-37	6.00008e-35	73.3708
TOR1AIP1	-0.177731	0.656219	-12.8064	5.74565e-37	8.10136e-35	73.0519
LZTFL1	-0.237214	0.112516	-12.7696	9.09229e-37	1.25414e-34	72.5983
CENPA	0.292656	-0.278711	12.7558	1.07928e-36	1.45703e-34	72.4288
UQCRB	0.21915	0.68225	12.7255	1.57143e-36	2.07723e-34	72.0575
VAMP2	-0.158044	0.232865	-12.6557	3.72473e-36	4.82314e-34	71.2047
POP7	0.151959	0.222054	12.5836	9.04551e-36	1.14787e-33	70.328
GARS	0.180735	0.991102	12.5611	1.19178e-35	1.48272e-33	70.0555
UQCRH	0.210062	0.33368	12.5549	1.28678e-35	1.57012e-33	69.9797
PARP3	-0.150642	-0.045689	-12.5525	1.32478e-35	1.58599e-33	69.951
TREM1	0.191335	-0.515183	12.5316	1.71018e-35	2.00946e-33	69.6987
SEC61G	0.203183	1.10589	12.5248	1.85989e-35	2.14564e-33	69.6157
PDCD5	0.181637	0.379475	12.4962	2.63646e-35	2.98721e-33	69.271
SPTAN1	-0.166564	1.17038	-12.4696	3.64344e-35	4.05572e-33	68.9514
CCT7	0.160686	0.865647	12.4182	6.80133e-35	7.44042e-33	68.3347
DICER1	-0.187479	0.372675	-12.4073	7.76736e-35	8.3532e-33	68.2035
CYC1	0.221208	1.11085	12.3929	9.2414e-35	9.77278e-33	68.0318
TPR	-0.192126	0.786753	-12.3901	9.55728e-35	9.94114e-33	67.9986
CHEK1	0.19695	-0.311741	12.3686	1.24059e-34	1.2696e-32	67.7409
PTP4A2	-0.223618	1.65947	-12.3322	1.92297e-34	1.9367e-32	67.3079
RAI2	-0.337825	-0.182197	-12.3294	1.98996e-34	1.97286e-32	67.2741
TXNIP	-0.310249	1.4464	-12.3198	2.23346e-34	2.16101e-32	67.1601
BYSL	0.166709	0.124718	12.3192	2.24785e-34	2.16101e-32	67.1537
UBE2V2	0.197396	0.486596	12.2973	2.92631e-34	2.77126e-32	66.8932
ANKRD12	-0.19314	0.157869	-12.2869	3.3154e-34	3.09356e-32	66.7699
MAD2L1	0.296271	0.0104977	12.2435	5.58013e-34	5.13129e-32	66.2556
LAPTM4B	0.3778	1.05573	12.2415	5.71278e-34	5.17822e-32	66.2324
PTPN6	-0.148449	0.40852	-12.238	5.96087e-34	5.327e-32	66.1904
BAZ2B	-0.192705	0.253585	-12.2161	7.73559e-34	6.81699e-32	65.933
EBP	0.179148	0.111847	12.1986	9.53889e-34	8.291e-32	65.726
HN1	0.259795	0.147399	12.1913	1.04068e-33	8.92312e-32	65.64
TRIP13	0.265374	-0.0676984	12.1746	1.26995e-33	1.07438e-31	65.4433
SNRK	-0.148649	0.238376	-12.1614	1.48453e-33	1.23939e-31	65.2891
PHF11	-0.154578	0.753252	-12.1508	1.68393e-33	1.3876e-31	65.1647
AARS	0.187149	1.18059	12.1444	1.8185e-33	1.47928e-31	65.0887
PDHA1	0.147078	0.371167	12.1342	2.05067e-33	1.64702e-31	64.97
HSPD1	0.228768	1.38318	12.1309	2.13284e-33	1.69161e-31	64.9312
S100A9	0.655525	0.156855	12.1043	2.92545e-33	2.2916e-31	64.6192
SRRM2	-0.196352	1.76213	-12.0827	3.77381e-33	2.9201e-31	64.3677
KARS	0.1723	0.559117	12.0113	8.76092e-33	6.69735e-31	63.5359
LAMB2	-0.264426	0.947918	-11.9916	1.104e-32	8.33916e-31	63.3076
DGKA	-0.160344	-0.094159	-11.9228	2.46798e-32	1.84227e-30	62.5132
PTPRT	-0.34224	-0.0416573	-11.9041	3.07176e-32	2.26632e-30	62.2971
CYBRD1	-0.474244	0.987891	-11.8914	3.559e-32	2.59562e-30	62.1517
WDR4	0.108855	-0.471208	11.8797	4.08e-32	2.94177e-30	62.0168
TMED9	0.180131	1.02094	11.8696	4.58592e-32	3.2694e-30	61.9014
RBM6	-0.165558	0.378028	-11.8595	5.16067e-32	3.63827e-30	61.7848
HMBS	0.136462	-0.118524	11.8472	5.95159e-32	4.14976e-30	61.6441
PJA2	-0.193398	1.07365	-11.8437	6.20131e-32	4.23738e-30	61.6035
GATA3	-0.533232	1.17274	-11.8435	6.21081e-32	4.23738e-30	61.602
DAZAP2	-0.14551	1.62544	-11.839	6.54291e-32	4.41647e-30	61.5505
WDR12	0.135176	0.162872	11.8103	9.12843e-32	6.09683e-30	61.2217
RRM2	0.30159	-0.244525	11.7972	1.06228e-31	7.02102e-30	61.0721
PSD3	-0.419651	0.0714459	-11.7904	1.14869e-31	7.51386e-30	60.9948
BCL2	-0.270163	0.216116	-11.7882	1.17824e-31	7.62851e-30	60.9698
ASXL2	-0.121597	0.422489	-11.7808	1.28336e-31	8.22518e-30	60.8854
PTS	0.17554	0.165581	11.7231	2.49437e-31	1.58268e-29	60.2293
NFKB1	-0.132682	0.899491	-11.7026	3.15628e-31	1.9676e-29	59.997
PSMB5	0.154652	0.898723	11.7024	3.16305e-31	1.9676e-29	59.9949
SUCLG1	0.112511	0.687959	11.694	3.48489e-31	2.14676e-29	59.8992
CCNB2	0.290703	0.103105	11.6833	3.93687e-31	2.40187e-29	59.7788
IRAK1	0.190459	0.82868	11.6746	4.3496e-31	2.6284e-29	59.6804
POLR2A	-0.164038	1.09024	-11.6709	4.53976e-31	2.71743e-29	59.6382
ADD1	-0.141213	1.31181	-11.6289	7.33034e-31	4.34682e-29	59.1652
GFRA1	-0.523459	0.623023	-11.6271	7.48475e-31	4.39729e-29	59.1446
FNBP4	-0.19148	0.650193	-11.624	7.75383e-31	4.51358e-29	59.1098
DPP8	-0.125473	0.242957	-11.6097	9.12769e-31	5.26502e-29	58.9487
GMPS	0.189312	0.534511	11.5823	1.24704e-30	7.12707e-29	58.6407
PURA	-0.146415	0.193183	-11.5815	1.25805e-30	7.12707e-29	58.6321
CCNA2	0.227661	-0.146052	11.5741	1.36737e-30	7.67782e-29	58.5498
VILL	-0.173436	-0.463291	-11.5605	1.59613e-30	8.88374e-29	58.3971
KIAA0753	-0.128198	-0.215079	-11.5294	2.27119e-30	1.24825e-28	58.049
S100A8	0.635987	-0.0140388	11.529	2.28207e-30	1.24825e-28	58.0443
TALDO1	0.164167	1.3621	11.5259	2.36356e-30	1.28178e-28	58.0096
MACF1	-0.201202	0.977927	-11.5133	2.72297e-30	1.46417e-28	57.8699
P4HA2	0.184893	0.394119	11.5074	2.91166e-30	1.55248e-28	57.8038
PHYH	0.216955	0.0714364	11.4984	3.2225e-30	1.7039e-28	57.7037
IMPA2	0.298826	0.0584245	11.4725	4.31327e-30	2.26179e-28	57.416
TKT	0.21555	0.881439	11.4691	4.48644e-30	2.33332e-28	57.3771
BIRC5	0.313171	-0.137583	11.4581	5.07589e-30	2.61842e-28	57.2553
ATP5C1	0.176695	1.09842	11.4258	7.29287e-30	3.73171e-28	56.8977
TARS	0.173547	0.533708	11.408	8.90318e-30	4.51925e-28	56.7008
COX5A	0.145472	1.17226	11.397	1.00735e-29	5.07275e-28	56.5789
GCLM	0.178763	-0.00379135	11.3904	1.084e-29	5.39566e-28	56.5065
GLCE	-0.230358	0.215248	-11.3901	1.08849e-29	5.39566e-28	56.5025
RFC2	0.143975	-0.156158	11.3863	1.13592e-29	5.58714e-28	56.4604
TRIM44	-0.135482	0.845939	-11.384	1.165e-29	5.68611e-28	56.4354
HEBP2	0.204145	0.835764	11.3563	1.58812e-29	7.69207e-28	56.1297
MRPL12	0.175442	0.272715	11.3308	2.1078e-29	1.01318e-27	55.8503
SMARCA2	-0.19963	0.85767	-11.3279	2.17889e-29	1.03948e-27	55.8176
NFIL3	0.227109	-0.185605	11.3191	2.40214e-29	1.13743e-27	55.7214
MUC1	-0.454759	1.4934	-11.303	2.87274e-29	1.35019e-27	55.5448
MYO5C	-0.242261	0.509942	-11.3007	2.94707e-29	1.37494e-27	55.5196
ELOVL1	0.144807	0.204417	11.2888	3.36482e-29	1.55838e-27	55.3888
PCF11	-0.120273	0.192196	-11.2761	3.8711e-29	1.77987e-27	55.2505
LRBA	-0.233773	0.869282	-11.2687	4.20275e-29	1.91845e-27	55.1694
RSBN1	-0.141815	0.191334	-11.2327	6.25869e-29	2.83653e-27	54.7765
OGT	-0.164747	0.832619	-11.208	8.21983e-29	3.69892e-27	54.5076
NSDHL	0.132631	0.223181	11.2018	8.79725e-29	3.93088e-27	54.4406
ECE2	0.135459	-0.158393	11.2005	8.92811e-29	3.96146e-27	54.4261
ZNF589	-0.11961	-0.236952	-11.186	1.0468e-28	4.61247e-27	54.2691
SLC7A5	0.316967	0.458872	11.1614	1.37206e-28	6.00396e-27	54.0022
NMB	0.185025	-0.232385	11.1457	1.62873e-28	7.07828e-27	53.833
SRD5A1	0.242747	-0.16391	11.1353	1.82592e-28	7.84196e-27	53.7203
NUMB	-0.117128	0.433629	-11.1351	1.82917e-28	7.84196e-27	53.7185
CREBBP	-0.145609	0.668221	-11.1179	2.21005e-28	9.41126e-27	53.5319
CHCHD3	0.126368	0.100021	11.1078	2.46606e-28	1.04314e-26	53.4238
PHLDA2	0.227346	-0.487872	11.1001	2.68235e-28	1.12712e-26	53.3409
FUCA1	-0.185642	0.655769	-11.0937	2.87578e-28	1.20045e-26	53.2722
CCT5	0.184724	0.52125	11.0773	3.43933e-28	1.42631e-26	53.0957
CHD1	-0.177974	0.333413	-11.0688	3.77416e-28	1.555e-26	53.004
TMEM45A	0.313147	0.022029	11.0561	4.3321e-28	1.77337e-26	52.868
YRDC	0.110057	0.132915	11.0532	4.47482e-28	1.82005e-26	52.8361
PSMA7	0.172265	0.137317	11.0483	4.716e-28	1.90592e-26	52.7843
RBM25	-0.154704	0.611435	-11.0376	5.29783e-28	2.12751e-26	52.6695
MYB	-0.361722	0.764873	-11.0036	7.66445e-28	3.05855e-26	52.3053
SALL2	-0.18018	0.0123954	-10.9702	1.09988e-27	4.3617e-26	51.9491
SRM	0.158143	0.436005	10.9686	1.11898e-27	4.40989e-26	51.9321
CDKN3	0.215061	-0.111174	10.9619	1.20229e-27	4.70897e-26	51.8612
BTG3	0.229145	0.191981	10.9595	1.23452e-27	4.80553e-26	51.8352
HHEX	-0.184398	-0.282212	-10.9354	1.59983e-27	6.18959e-26	51.5795
TBPL1	0.142221	0.0888353	10.9293	1.70926e-27	6.57287e-26	51.5143
PTTG1	0.222106	0.441413	10.9192	1.90439e-27	7.27911e-26	51.4077
TPI1	0.187848	1.58291	10.9177	1.93593e-27	7.35536e-26	51.3915
ELF1	-0.161533	0.553357	-10.9115	2.06978e-27	7.81712e-26	51.3255
NETO2	0.26192	-0.160454	10.8986	2.37638e-27	8.92196e-26	51.1893
ADAM9	0.257738	0.121956	10.893	2.52385e-27	9.41991e-26	51.1299
PELO	0.123559	0.20151	10.8835	2.79436e-27	1.03685e-25	51.0295
ALG3	0.122822	0.429402	10.8605	3.57405e-27	1.31845e-25	50.7869
ESR1	-0.551792	1.10894	-10.8522	3.90838e-27	1.43345e-25	50.6987
MDH2	0.142248	1.66546	10.8504	3.98314e-27	1.45247e-25	50.68
KIF2C	0.229509	-0.124562	10.8483	4.07225e-27	1.47648e-25	50.6582
FAM64A	0.19875	-0.361729	10.7664	9.74125e-27	3.51183e-25	49.7982
MVD	0.161738	-0.416877	10.7593	1.05079e-26	3.76681e-25	49.7235
MPHOSPH6	0.215169	-0.143387	10.743	1.2488e-26	4.45149e-25	49.5533
YARS	0.134691	0.763434	10.7375	1.32371e-26	4.69215e-25	49.4959
MRPS18A	0.110298	0.106546	10.7287	1.45224e-26	5.11914e-25	49.4045
CYFIP2	-0.217019	0.392406	-10.7255	1.50264e-26	5.26756e-25	49.3709
BTBD7	-0.14403	-0.102923	-10.7037	1.89148e-26	6.59421e-25	49.144
HSD17B4	-0.201699	0.899956	-10.694	2.09601e-26	7.2673e-25	49.0428
CPEB3	-0.167439	-0.145306	-10.6878	2.2381e-26	7.71778e-25	48.9781
COL4A5	-0.35101	0.404857	-10.6848	2.30886e-26	7.89522e-25	48.9474
POLR2D	0.0994718	0.0070505	10.6846	2.31444e-26	7.89522e-25	48.945
HRSP12	0.188819	0.126881	10.6694	2.715e-26	9.21212e-25	48.7877
PIAS1	-0.106117	0.349308	-10.6569	3.09609e-26	1.04493e-24	48.6582
POLR2F	0.13515	0.584717	10.6365	3.83619e-26	1.28787e-24	48.4469
SEL1L	-0.141557	0.212454	-10.6169	4.71217e-26	1.57362e-24	48.2442
DHODH	0.0910588	-0.528928	10.595	5.92735e-26	1.96906e-24	48.018
GLRX2	0.14766	-0.089835	10.5935	6.0191e-26	1.98912e-24	48.0029
P2RX4	-0.160281	0.349084	-10.5916	6.13909e-26	2.01827e-24	47.9834
MRFAP1L1	-0.147951	0.894129	-10.5876	6.40003e-26	2.09321e-24	47.9424
SHFM1	0.149907	0.0960344	10.5745	7.33685e-26	2.3873e-24	47.8077
VDAC2	0.127108	0.702846	10.5708	7.63112e-26	2.47038e-24	47.769
TFF1	-0.746693	0.451398	-10.5661	8.01484e-26	2.58143e-24	47.7206
UBE2C	0.267984	0.492311	10.5654	8.06989e-26	2.58603e-24	47.7139
TGFB3	-0.230646	0.536687	-10.5602	8.52292e-26	2.71748e-24	47.6601
STC2	-0.510371	1.11643	-10.5584	8.67749e-26	2.75293e-24	47.6423
SUZ12	-0.162165	0.75373	-10.5566	8.84866e-26	2.79327e-24	47.6231
P4HA1	0.187724	0.297989	10.5481	9.66555e-26	3.03604e-24	47.536
ASNS	0.231117	0.281503	10.543	1.01929e-25	3.18591e-24	47.4837
MRPL42	0.154381	0.294795	10.5396	1.05628e-25	3.28533e-24	47.4486
PYCARD	-0.280349	0.734817	-10.5225	1.26156e-25	3.90469e-24	47.2735
GGH	0.308185	0.0976328	10.4926	1.71934e-25	5.29573e-24	46.9684
CDC20	0.286338	0.347277	10.4884	1.79597e-25	5.50504e-24	46.9254
SENP7	-0.187553	-0.193067	-10.4834	1.89183e-25	5.77099e-24	46.8742
CDC34	0.1349	0.00910874	10.4748	2.06793e-25	6.278e-24	46.7865
CHCHD2	0.147964	1.29472	10.47	2.17286e-25	6.56515e-24	46.7377
DCP2	-0.139185	0.38634	-10.4686	2.20525e-25	6.62447e-24	46.7231
XPOT	0.161622	0.496267	10.4682	2.21338e-25	6.62447e-24	46.7195
MELK	0.250023	-0.00742582	10.463	2.3353e-25	6.95657e-24	46.6666
CISH	-0.225665	0.0567679	-10.4558	2.51683e-25	7.46227e-24	46.5929
CCNC	0.176734	0.218227	10.4412	2.92381e-25	8.62863e-24	46.4452
PDCD6IP	-0.12852	0.634348	-10.4367	3.06335e-25	8.99858e-24	46.3992
HERC1	-0.134119	0.424647	-10.4354	3.10577e-25	9.08117e-24	46.3857
PES1	0.122598	-0.121088	10.4346	3.13128e-25	9.11375e-24	46.3776
JAK2	-0.143637	-0.368007	-10.4308	3.25404e-25	9.40712e-24	46.3397
RFX5	-0.128829	0.658621	-10.4306	3.26173e-25	9.40712e-24	46.3374
SNRPC	0.122458	0.339639	10.4164	3.77414e-25	1.08357e-23	46.1936
PRRG1	0.151548	-0.329966	10.4135	3.88863e-25	1.11057e-23	46.1642
PTDSS1	0.168488	0.691286	10.413	3.90825e-25	1.11057e-23	46.1592
F2RL2	-0.249465	-0.34804	-10.4127	3.92067e-25	1.11057e-23	46.1561
NCOR1	-0.142125	0.273276	-10.3964	4.63985e-25	1.30844e-23	45.9901
ARHGDIB	-0.207248	1.75831	-10.3878	5.06794e-25	1.42284e-23	45.9032
NIN	-0.164941	-0.0419681	-10.3784	5.58026e-25	1.55977e-23	45.8083
GALK2	0.10081	-0.326653	10.3736	5.85711e-25	1.62997e-23	45.7606
GART	0.119597	0.00409072	10.3638	6.4784e-25	1.795e-23	45.6612
CARHSP1	0.170512	0.450027	10.3573	6.92604e-25	1.91068e-23	45.5954
KDELR2	0.171356	1.16679	10.3504	7.43071e-25	2.04103e-23	45.5261
MCM10	0.227611	-0.249763	10.329	9.24652e-25	2.52884e-23	45.3107
KIAA0040	-0.217546	0.24126	-10.3248	9.65417e-25	2.629e-23	45.2682
ADRM1	0.161916	0.436543	10.3181	1.03298e-24	2.80097e-23	45.2015
CECR5	0.135112	0.414863	10.3123	1.0957e-24	2.9584e-23	45.1434
COG2	-0.141769	0.478752	-10.3118	1.10221e-24	2.96335e-23	45.1376
FBP1	-0.281655	0.729779	-10.302	1.21773e-24	3.26012e-23	45.0394
COQ3	0.105927	-0.0820647	10.2905	1.36893e-24	3.64952e-23	44.9241
PFKL	0.136694	0.590734	10.2799	1.5238e-24	4.04541e-23	44.8185
NF1	-0.114435	-0.121651	-10.2745	1.61086e-24	4.2587e-23	44.7638
COQ2	0.120557	0.0993646	10.2514	2.03442e-24	5.35619e-23	44.5338
CCL19	-0.388257	0.154622	-10.2494	2.07786e-24	5.44795e-23	44.513
H2AFZ	0.189851	1.39925	10.2389	2.31111e-24	6.03457e-23	44.4082
SPOP	-0.153891	0.840208	-10.2323	2.47e-24	6.42302e-23	44.3427
SLC19A1	0.1341	-0.437992	10.2314	2.4922e-24	6.4543e-23	44.3339
GLI3	-0.223403	0.13058	-10.2267	2.61384e-24	6.74179e-23	44.2869
RASGRP1	-0.256918	-0.310605	-10.2215	2.75546e-24	7.07829e-23	44.235
NIPBL	-0.128703	0.422839	-10.1873	3.89148e-24	9.95622e-23	43.8949
IL16	-0.13438	-0.1966	-10.1634	4.94717e-24	1.26063e-22	43.6585
PGM3	0.148959	0.0233682	10.1582	5.21434e-24	1.3234e-22	43.6067
GPR126	0.258795	-0.466796	10.1493	5.70228e-24	1.44147e-22	43.5186
LYPLA2	0.112538	0.0187338	10.1431	6.06695e-24	1.52757e-22	43.4575
DNALI1	-0.346799	0.183882	-10.1286	7.01739e-24	1.7599e-22	43.3142
IKBKB	-0.189989	0.461628	-10.1242	7.32963e-24	1.83096e-22	43.2713
ZWINT	0.211698	0.0940715	10.1208	7.58229e-24	1.88665e-22	43.2379
GAS7	-0.140806	0.0414326	-10.1068	8.7223e-24	2.16184e-22	43.1
ZMYND10	-0.180665	-0.372826	-10.0936	9.95458e-24	2.44838e-22	42.9698
SEC14L2	-0.333267	-0.0100529	-10.0936	9.95559e-24	2.44838e-22	42.9697
ZNF250	0.114668	-0.171335	10.0916	1.01555e-23	2.48791e-22	42.9501
BCAP31	0.152132	1.4634	10.0908	1.02379e-23	2.49843e-22	42.9422
CCT2	0.186998	1.03256	10.0831	1.10609e-23	2.68895e-22	42.866
FLNB	-0.238598	1.53531	-10.0803	1.13677e-23	2.75298e-22	42.8391
ANGPTL4	0.251506	-0.211951	10.0696	1.2647e-23	3.05114e-22	42.7341
RAD54B	0.149235	-0.356409	10.0687	1.27636e-23	3.06761e-22	42.725
ZNF671	-0.15827	-0.265649	-10.0665	1.30459e-23	3.11201e-22	42.7035
ABCB6	0.13402	-0.33482	10.0665	1.30464e-23	3.11201e-22	42.7035
SNX1	-0.152059	0.191703	-10.0594	1.40051e-23	3.32818e-22	42.6336
PSMC1	0.111339	0.483264	10.0563	1.4442e-23	3.41919e-22	42.6034
RPP40	0.137516	0.229795	10.0532	1.48864e-23	3.51131e-22	42.5735
PHF3	-0.135106	0.505983	-10.043	1.64824e-23	3.87336e-22	42.4732
RBBP6	-0.129572	0.263863	-10.0397	1.70363e-23	3.98876e-22	42.4407
ABAT	-0.225725	-0.174018	-10.0318	1.84155e-23	4.29581e-22	42.364
LTA4H	-0.132174	0.927159	-10.0296	1.88335e-23	4.37724e-22	42.3419
SOX11	0.368506	-0.435203	10.0149	2.17907e-23	5.04605e-22	42.1983
ANKRD10	-0.14781	0.350445	-10.0054	2.39434e-23	5.51579e-22	42.1055
RERE	-0.124064	0.452002	-10.0052	2.3993e-23	5.51579e-22	42.1035
RUNX1	-0.167409	0.633192	-10.0008	2.50439e-23	5.7366e-22	42.0613
RASA1	-0.163678	0.594668	-9.99896	2.55122e-23	5.82285e-22	42.043
SYNE2	-0.165223	0.309659	-9.99744	2.58986e-23	5.88984e-22	42.0282
G6PD	0.194618	0.534474	9.98184	3.02191e-23	6.84786e-22	41.8763
ISOC2	0.126405	0.215657	9.97805	3.13705e-23	7.08347e-22	41.8395
PSD4	-0.121736	0.194338	-9.95947	3.76882e-23	8.47985e-22	41.6589
HOMER3	0.145637	-0.094204	9.95445	3.95971e-23	8.87787e-22	41.6102
KCTD3	-0.238342	0.866156	-9.93818	4.64797e-23	1.03843e-21	41.4524
LRP8	0.174299	-0.372277	9.93603	4.74751e-23	1.05694e-21	41.4316
ATP7B	-0.185649	-0.0385722	-9.93067	5.00444e-23	1.11025e-21	41.3797
CXCL14	-0.513041	0.561334	-9.92813	5.1312e-23	1.13441e-21	41.355
RIPK4	0.17507	-0.283252	9.91988	5.56429e-23	1.22588e-21	41.2753
TIMM13	0.129489	-0.179719	9.9175	5.69592e-23	1.25054e-21	41.2522
TK1	0.24026	0.249672	9.91563	5.80182e-23	1.2694e-21	41.2341
INPP5D	-0.149583	-0.381642	-9.90703	6.31293e-23	1.37648e-21	41.151
ABCB1	-0.136498	-0.447281	-9.90197	6.63408e-23	1.44155e-21	41.1021
BTRC	-0.144082	-0.144426	-9.90103	6.69534e-23	1.4499e-21	41.0931
STAT5B	-0.120053	0.102838	-9.89897	6.83237e-23	1.47454e-21	41.0731
LPP	-0.169553	1.03462	-9.89786	6.90667e-23	1.48552e-21	41.0625
PSMB2	0.12549	0.912118	9.8737	8.7504e-23	1.87572e-21	40.8296
UBP1	-0.12218	0.719511	-9.85547	1.0457e-22	2.234e-21	40.6542
CDCA3	0.216805	-0.287335	9.85271	1.07429e-22	2.28738e-21	40.6276
NEDD4L	-0.203858	0.217924	-9.83938	1.22348e-22	2.59631e-21	40.4996
MPP6	0.175447	-0.550695	9.83504	1.27638e-22	2.69955e-21	40.4579
CHAD	-0.39081	-0.346418	-9.83457	1.28216e-22	2.70276e-21	40.4535
METTL1	0.102735	0.0564098	9.83181	1.31712e-22	2.76727e-21	40.427
PPP2R2A	-0.129308	0.585872	-9.80948	1.63682e-22	3.42759e-21	40.2131
CD3E	-0.142269	-0.302397	-9.80486	1.71207e-22	3.57339e-21	40.1689
SORL1	-0.194655	0.351439	-9.7968	1.85144e-22	3.85161e-21	40.0918
DACH1	-0.340792	0.126717	-9.79466	1.89025e-22	3.91949e-21	40.0714
CLASP2	-0.113361	-0.0178074	-9.78846	2.00749e-22	4.14903e-21	40.0122
RFC4	0.164877	0.134281	9.78785	2.01948e-22	4.16026e-21	40.0063
HMGB3	0.244651	0.233126	9.78261	2.12475e-22	4.36296e-21	39.9563
VPS13D	-0.113527	0.0292537	-9.76215	2.59059e-22	5.30235e-21	39.7612
POLR2C	0.0997861	0.376013	9.76008	2.64286e-22	5.39194e-21	39.7415
CD8A	-0.210392	-0.0270377	-9.75598	2.74993e-22	5.59241e-21	39.7025
PSAT1	0.210196	-0.316936	9.75164	2.86762e-22	5.81312e-21	39.6612
SMARCC2	-0.117707	0.550253	-9.74687	3.00311e-22	6.06839e-21	39.6158
TXN	0.16297	1.36257	9.72516	3.70303e-22	7.45896e-21	39.4096
PLOD3	0.145841	0.662908	9.72053	3.87236e-22	7.75871e-21	39.3656
KATNB1	0.113433	-0.0312921	9.72042	3.8763e-22	7.75871e-21	39.3646
PLOD2	0.24027	0.640405	9.69608	4.89984e-22	9.77657e-21	39.134
CRY2	-0.173317	0.121468	-9.69543	4.93082e-22	9.80754e-21	39.1278
CNIH4	0.194395	0.614378	9.68928	5.23079e-22	1.03717e-20	39.0697
MDFI	0.216119	-0.471323	9.67741	5.86251e-22	1.1588e-20	38.9575
MRPL18	0.114268	0.622432	9.67654	5.91174e-22	1.16491e-20	38.9492
SLC16A3	0.206999	0.31881	9.67523	5.98646e-22	1.17598e-20	38.9369
SESN1	-0.161164	0.195897	-9.64507	7.9924e-22	1.56518e-20	38.6525
EBNA1BP2	0.123797	0.787043	9.6426	8.18387e-22	1.59774e-20	38.6292
PRKCH	-0.116254	0.259425	-9.63854	8.50753e-22	1.65584e-20	38.5911
RBM22	-0.103142	0.802661	-9.62415	9.76155e-22	1.8941e-20	38.4558
DDB1	0.107721	0.462444	9.59533	1.28485e-21	2.48549e-20	38.1854
COX4I1	0.139472	1.7651	9.59059	1.34415e-21	2.59229e-20	38.141
RPP25	0.142898	-0.21884	9.58766	1.38217e-21	2.65753e-20	38.1136
ARHGAP19	-0.107927	-0.106045	-9.57096	1.61993e-21	3.10528e-20	37.9574
CA12	-0.417553	1.29953	-9.56445	1.72333e-21	3.29353e-20	37.8965
PSME1	-0.144825	1.52745	-9.56382	1.73358e-21	3.30317e-20	37.8907
FAIM	0.143578	-0.134229	9.56169	1.76901e-21	3.36059e-20	37.8708
ITPR2	-0.188622	0.185511	-9.5511	1.95603e-21	3.70477e-20	37.7719
HDAC2	0.167797	0.853561	9.5504	1.96899e-21	3.71824e-20	37.7654
PUM2	-0.0958021	0.777196	-9.52927	2.40523e-21	4.52854e-20	37.5686
CBFA2T2	-0.103025	0.00493681	-9.52797	2.43484e-21	4.57072e-20	37.5565
CD6	-0.130355	-0.258201	-9.52539	2.49512e-21	4.67006e-20	37.5325
TYK2	-0.10911	0.645499	-9.48603	3.61732e-21	6.75056e-20	37.1671
ANKRA2	-0.124869	0.0339932	-9.48559	3.63255e-21	6.7591e-20	37.163
CDCA8	0.211934	-0.212497	9.47975	3.83768e-21	7.1199e-20	37.109
SQLE	0.239674	0.53306	9.47183	4.13467e-21	7.64854e-20	37.0356
SRPK1	0.132671	0.383918	9.45971	4.63376e-21	8.54686e-20	36.9235
RARRES3	-0.311869	1.28061	-9.45691	4.75733e-21	8.74934e-20	36.8977
KATNA1	0.105226	0.159117	9.45009	5.07181e-21	9.30076e-20	36.8347
ZNF148	-0.140101	0.743518	-9.4434	5.40029e-21	9.85271e-20	36.773
ZNF91	-0.23997	0.427177	-9.44333	5.40385e-21	9.85271e-20	36.7723
TIMM17A	0.114854	-0.0774612	9.43738	5.71373e-21	1.03878e-19	36.7175
COX7B	0.139264	0.79859	9.43441	5.87524e-21	1.0651e-19	36.6901
MRPL39	0.111586	0.189499	9.43228	5.99328e-21	1.0834e-19	36.6705
TNRC6B	-0.12137	0.324348	-9.43113	6.05832e-21	1.09205e-19	36.6599
PBXIP1	-0.119033	-0.0323976	-9.42427	6.4603e-21	1.16121e-19	36.5967
ARL6IP5	-0.137855	1.25401	-9.41868	6.80744e-21	1.22015e-19	36.5452
HSPA14	0.143002	0.175116	9.41424	7.09576e-21	1.26824e-19	36.5044
AHCY	0.170379	0.963805	9.40819	7.50915e-21	1.33614e-19	36.4487
DPM1	0.148887	0.573676	9.40807	7.51774e-21	1.33614e-19	36.4476
SPP1	0.418478	0.794246	9.40712	7.58474e-21	1.34428e-19	36.4389
CSAD	-0.194212	0.33674	-9.40401	7.80826e-21	1.38004e-19	36.4103
ZNF236	-0.105354	-0.451572	-9.40342	7.85135e-21	1.3838e-19	36.4049
BBS1	-0.127576	0.124535	-9.399	8.18231e-21	1.43814e-19	36.3643
NRIP1	-0.244059	0.744329	-9.39493	8.49881e-21	1.48964e-19	36.327
ENO1	0.1934	2.1899	9.39012	8.88947e-21	1.55382e-19	36.2828
RTF1	-0.0899432	0.00188313	-9.38495	9.32851e-21	1.62608e-19	36.2354
GEMIN6	0.108882	0.151863	9.38133	9.64842e-21	1.67724e-19	36.2022
WDR7	-0.0967005	-0.15605	-9.3794	9.82335e-21	1.70298e-19	36.1846
GPAA1	0.159367	0.703872	9.37297	1.04304e-20	1.8033e-19	36.1256
ZNF593	0.119542	0.354773	9.36812	1.09115e-20	1.88135e-19	36.0812
AQP9	0.194636	-0.505571	9.36528	1.12046e-20	1.92664e-19	36.0552
SETDB1	-0.107301	0.342895	-9.36306	1.14384e-20	1.96152e-19	36.0349
HPSE	0.141328	-0.524701	9.36036	1.17292e-20	2.00598e-19	36.0102
FMOD	-0.259209	0.389181	-9.3587	1.19119e-20	2.03174e-19	35.995
TSTA3	0.17686	0.422901	9.35764	1.20298e-20	2.04635e-19	35.9853
EXO1	0.171804	-0.239961	9.35508	1.23195e-20	2.09003e-19	35.9619
B4GALT2	0.0914195	-0.146799	9.34827	1.31246e-20	2.22069e-19	35.8996
CD37	-0.188822	-0.093592	-9.3397	1.42106e-20	2.39805e-19	35.8215
LTBR	0.128651	0.251933	9.33751	1.45023e-20	2.44078e-19	35.8015
PLOD1	0.15605	1.01702	9.33587	1.47257e-20	2.47182e-19	35.7865
TSC1	-0.0966962	0.1952	-9.3336	1.50387e-20	2.51769e-19	35.7658
RIPK2	0.147953	0.143806	9.33308	1.51113e-20	2.52319e-19	35.761
FBXO5	0.13974	-0.178712	9.3316	1.53208e-20	2.55146e-19	35.7475
RHEB	0.109604	0.477335	9.32937	1.56402e-20	2.59784e-19	35.7272
ZAP70	-0.1665	-0.480154	-9.32455	1.63558e-20	2.7096e-19	35.6832
DOCK10	-0.147444	-0.0192852	-9.322	1.67456e-20	2.76695e-19	35.6601
STIP1	0.171001	0.801978	9.32043	1.69912e-20	2.80024e-19	35.6457
PRDX1	0.158777	1.75132	9.31732	1.74879e-20	2.87463e-19	35.6174
IL2RG	-0.187884	-0.33764	-9.31518	1.78377e-20	2.92455e-19	35.5979
MRPL33	0.12757	0.479964	9.30982	1.8745e-20	3.06538e-19	35.5492
BUB1	0.188423	-0.236861	9.30806	1.90523e-20	3.10764e-19	35.5332
PFDN2	0.137761	-0.216678	9.30082	2.03722e-20	3.31439e-19	35.4673
UFD1L	0.117452	-0.0494506	9.29137	2.22324e-20	3.60778e-19	35.3814
TES	0.15454	-0.0737746	9.29049	2.24141e-20	3.62799e-19	35.3734
NAPG	0.0998394	-0.198672	9.26275	2.89473e-20	4.67355e-19	35.1219
PIK3R1	-0.206407	0.636724	-9.2608	2.94714e-20	4.74609e-19	35.1043
VBP1	0.136223	0.505125	9.25284	3.17136e-20	5.09425e-19	35.0322
FLT3	-0.145112	-0.473296	-9.25025	3.2476e-20	5.20353e-19	35.0088
POGZ	-0.138068	0.276403	-9.23676	3.67662e-20	5.87612e-19	34.8868
NXF1	-0.101098	0.534099	-9.22221	4.20183e-20	6.69865e-19	34.7556
FNDC3A	-0.132961	0.046858	-9.22038	4.27271e-20	6.79457e-19	34.7391
ITK	-0.178597	-0.254157	-9.21592	4.45134e-20	7.06094e-19	34.6989
RANBP1	0.118724	0.410537	9.21496	4.49068e-20	7.10557e-19	34.6902
IGF1R	-0.265125	0.454432	-9.20459	4.93792e-20	7.79381e-19	34.5969
UTP11L	0.0962994	0.365935	9.20295	5.01282e-20	7.8924e-19	34.5821
CSTB	0.168395	1.36873	9.19958	5.16986e-20	8.1195e-19	34.5518
VAV3	-0.363247	0.562582	-9.19816	5.23738e-20	8.20523e-19	34.539
CDC42EP1	0.148981	-0.0761672	9.19246	5.51744e-20	8.62271e-19	34.4878
DNMT3B	0.133697	-0.387596	9.18309	6.01084e-20	9.3707e-19	34.4036
ECHDC2	-0.178418	0.870474	-9.17587	6.42027e-20	9.98446e-19	34.3389
TNFRSF12A	0.163762	0.0987244	9.16632	7.00513e-20	1.08674e-18	34.2532
ATP6V0B	0.134624	1.2614	9.16321	7.20637e-20	1.11523e-18	34.2253
RORC	-0.160292	-0.124898	-9.14821	8.26176e-20	1.27545e-18	34.091
GNAI2	-0.11845	1.19876	-9.14006	8.8974e-20	1.37024e-18	34.0181
TRIM45	-0.14009	-0.120284	-9.1374	9.11509e-20	1.40037e-18	33.9944
LEF1	-0.130372	-0.0455615	-9.13137	9.62888e-20	1.47573e-18	33.9405
FAAH	-0.165436	0.11956	-9.12837	9.89477e-20	1.51283e-18	33.9137
ADRA2A	-0.199682	-0.235381	-9.12344	1.03478e-19	1.57828e-18	33.8697
ARNT2	-0.273361	0.0663818	-9.118	1.08718e-19	1.65424e-18	33.8212
PHF1	-0.0972163	0.0444703	-9.10177	1.25957e-19	1.91195e-18	33.6765
FOXA1	-0.395938	1.22379	-9.09738	1.31062e-19	1.9847e-18	33.6375
ADAR	-0.149316	1.50188	-9.0948	1.3416e-19	2.02678e-18	33.6145
GOSR2	0.0824146	-0.106833	9.0939	1.3525e-19	2.03838e-18	33.6066
SHMT2	0.128802	0.710121	9.09298	1.36386e-19	2.05064e-18	33.5983
ELP3	-0.117239	0.233744	-9.09105	1.38795e-19	2.08193e-18	33.5811
MRPS12	0.112786	-0.466485	9.08919	1.41138e-19	2.11208e-18	33.5647
RPS21	0.16544	1.26466	9.08807	1.42583e-19	2.12867e-18	33.5547
RACGAP1	0.179962	0.211406	9.05284	1.95982e-19	2.91903e-18	33.2421
MADD	-0.089669	0.0385994	-9.05246	1.96645e-19	2.92204e-18	33.2388
CCNG2	-0.2014	0.437918	-9.04878	2.03289e-19	3.01372e-18	33.2061
PKP4	-0.139261	0.749033	-9.04589	2.08649e-19	3.08532e-18	33.1805
MKL2	-0.162542	0.239429	-9.04565	2.09092e-19	3.08532e-18	33.1785
H1F0	-0.191452	1.58003	-9.03775	2.24499e-19	3.30499e-18	33.1086
MOAP1	-0.14272	0.324981	-9.0276	2.45961e-19	3.61256e-18	33.0189
PLAUR	0.146679	0.206298	9.02704	2.47204e-19	3.62242e-18	33.0139
ADH5	0.0999589	0.0398378	9.02369	2.54757e-19	3.72449e-18	32.9844
MAP4K1	-0.159161	-0.248394	-9.02041	2.62371e-19	3.827e-18	32.9554
PER2	-0.137815	0.391475	-9.01922	2.65201e-19	3.8594e-18	32.9449
RAC2	-0.183768	0.363145	-9.00774	2.93992e-19	4.2686e-18	32.8436
PPP3CB	-0.0982749	0.574365	-8.98548	3.58875e-19	5.19604e-18	32.6477
PDZK1	-0.449418	-0.265453	-8.98528	3.59506e-19	5.19604e-18	32.646
ABI3BP	-0.170721	-0.269708	-8.97598	3.90701e-19	5.63409e-18	32.5642
GZMK	-0.26987	-0.0707679	-8.95047	4.90621e-19	7.05893e-18	32.3405
RRS1	0.150116	0.140767	8.93918	5.42541e-19	7.77651e-18	32.2417
MMD	0.174867	0.130077	8.9391	5.42946e-19	7.77651e-18	32.2409
CSTF1	0.0968168	-0.257277	8.92225	6.30764e-19	9.01396e-18	32.0937
UGP2	0.134412	0.462665	8.91473	6.74339e-19	9.61502e-18	32.028
PFN2	0.210097	0.577395	8.89944	7.72372e-19	1.09881e-17	31.8947
MCTS1	0.115406	0.00036729	8.89893	7.75834e-19	1.10127e-17	31.8903
YKT6	0.111148	-0.135947	8.89848	7.78945e-19	1.10322e-17	31.8864
PLXNB3	0.13931	-0.499461	8.89296	8.18042e-19	1.15601e-17	31.8383
NDUFAB1	0.11304	1.04562	8.88725	8.60472e-19	1.21327e-17	31.7886
TCF4	-0.167494	0.536288	-8.88648	8.66391e-19	1.2189e-17	31.7819
HIVEP2	0.100838	-0.21679	8.87767	9.3665e-19	1.31483e-17	31.7053
EIF4E2	0.0876827	0.473363	8.86991	1.00318e-18	1.40512e-17	31.6379
ARHGEF18	-0.09343	0.429987	-8.86269	1.06926e-18	1.49438e-17	31.5752
CILP	-0.345493	0.78698	-8.85888	1.10583e-18	1.54209e-17	31.5422
RAD51	0.120002	-0.656208	8.85841	1.11049e-18	1.54518e-17	31.5381
NUP210	-0.155466	0.1576	-8.856	1.13434e-18	1.57492e-17	31.5172
ARIH2	-0.0928533	0.355746	-8.85095	1.18603e-18	1.64309e-17	31.4735
POLD2	0.108663	1.08318	8.84027	1.30316e-18	1.80143e-17	31.381
ATP1B3	0.148015	0.65897	8.83173	1.40497e-18	1.93795e-17	31.3071
PRC1	0.231202	0.357986	8.82722	1.46191e-18	2.0121e-17	31.2681
SLC31A1	0.121275	0.143425	8.81875	1.57492e-18	2.16296e-17	31.1949
UCHL1	0.20966	-0.296674	8.79974	1.8611e-18	2.55046e-17	31.031
CLK4	-0.136321	-0.0893838	-8.79646	1.91539e-18	2.61921e-17	31.0027
SAP30	0.12625	-0.173807	8.79557	1.93052e-18	2.63423e-17	30.995
ERBB3	-0.197	1.26274	-8.78896	2.0456e-18	2.78526e-17	30.9382
SUOX	-0.107163	0.486267	-8.78652	2.08981e-18	2.83936e-17	30.9172
FTSJ1	0.0757107	-0.0982768	8.78375	2.14117e-18	2.90294e-17	30.8933
SMARCD2	0.135197	0.291728	8.78292	2.15689e-18	2.91801e-17	30.8861
TRIM38	-0.119775	0.0407135	-8.77394	2.33317e-18	3.14978e-17	30.809
CD79A	-0.192032	-0.105927	-8.76737	2.47121e-18	3.32905e-17	30.7526
TTK	0.211064	-0.199096	8.76578	2.50583e-18	3.36703e-17	30.7389
MYBL2	0.181269	-0.415422	8.76559	2.51001e-18	3.36703e-17	30.7373
GOLPH3L	-0.157799	0.411037	-8.75915	2.65521e-18	3.54971e-17	30.682
IFRD1	0.158053	-0.10804	8.75906	2.65739e-18	3.54971e-17	30.6812
ANXA2	0.159115	1.40658	8.74719	2.94754e-18	3.92902e-17	30.5795
PDCD10	0.131264	0.486868	8.73804	3.19221e-18	4.24624e-17	30.5012
ARHGAP25	-0.146904	-0.16164	-8.73387	3.31044e-18	4.39429e-17	30.4655
HDLBP	0.114861	0.701378	8.73183	3.36977e-18	4.46371e-17	30.4481
CEBPG	0.137574	0.353528	8.72352	3.62276e-18	4.78883e-17	30.377
ARID4A	-0.105108	-0.206665	-8.72308	3.63659e-18	4.79077e-17	30.3732
TPP2	-0.105079	-0.0965317	-8.72299	3.63932e-18	4.79077e-17	30.3725
PTPRE	-0.113934	0.159907	-8.72117	3.69742e-18	4.85717e-17	30.357
DDX17	-0.209847	1.18172	-8.71424	3.92729e-18	5.14848e-17	30.2977
KIF4A	0.160955	-0.263935	8.7126	3.98347e-18	5.21137e-17	30.2838
AR	-0.303409	0.396892	-8.70794	4.1481e-18	5.41558e-17	30.244
RPL26L1	0.104122	-0.00322133	8.70657	4.19786e-18	5.46929e-17	30.2323
HCCS	0.101356	-0.0124748	8.70389	4.2968e-18	5.58672e-17	30.2095
PVR	0.0954125	-0.339532	8.70221	4.35972e-18	5.65693e-17	30.1952
UCHL3	0.130756	0.219415	8.70018	4.43746e-18	5.74606e-17	30.1778
ETFB	0.172148	0.285362	8.69284	4.72924e-18	6.11141e-17	30.1153
SF3B5	0.118886	0.787131	8.68895	4.89126e-18	6.30793e-17	30.0823
FUT3	0.160813	-0.473402	8.6877	4.94456e-18	6.36374e-17	30.0716
PAQR3	0.111465	-0.272141	8.68555	5.03785e-18	6.47068e-17	30.0533
PFKP	0.244383	0.315487	8.68351	5.12742e-18	6.56919e-17	30.036
SLC25A12	-0.12171	-0.0329234	-8.68333	5.13572e-18	6.56919e-17	30.0344
IGBP1	-0.112762	0.53116	-8.68311	5.14561e-18	6.56919e-17	30.0325
TCEB3	0.081572	0.0776832	8.67502	5.51879e-18	7.03147e-17	29.9638
SIAH2	-0.232856	0.28838	-8.67042	5.74314e-18	7.30265e-17	29.9246
ITM2A	-0.24955	0.318028	-8.66875	5.82677e-18	7.39417e-17	29.9105
CCNE1	0.170922	-0.32033	8.66135	6.21176e-18	7.86699e-17	29.8476
KLF2	-0.156753	0.776819	-8.65133	6.77343e-18	8.56124e-17	29.7627
LRMP	-0.13748	-0.346717	-8.64636	7.07021e-18	8.91858e-17	29.7206
CA9	0.220179	-0.562246	8.64278	7.2921e-18	9.18023e-17	29.6903
PLCD1	-0.0815559	-0.123624	-8.63893	7.53815e-18	9.4712e-17	29.6577
USP34	-0.126217	0.26085	-8.6381	7.59196e-18	9.51996e-17	29.6507
SPCS3	0.119566	0.0280287	8.63769	7.61922e-18	9.5353e-17	29.6472
AGR2	-0.516731	0.748214	-8.63614	7.72147e-18	9.64423e-17	29.6341
FAIM3	-0.171651	0.105219	-8.63489	7.80495e-18	9.72935e-17	29.6235
NCOR2	-0.120717	1.18996	-8.63355	7.89607e-18	9.82365e-17	29.6121
NOLC1	0.114394	0.294063	8.61748	9.06745e-18	1.12589e-16	29.4764
PKP3	0.131564	-0.282459	8.6167	9.12856e-18	1.13126e-16	29.4698
MST1	-0.13363	-0.0243042	-8.61558	9.21722e-18	1.14003e-16	29.4603
YWHAQ	0.132294	1.65882	8.60123	1.04268e-17	1.28712e-16	29.3393
DKK1	0.282146	-0.451778	8.59979	1.05569e-17	1.30065e-16	29.3271
DNAJC12	-0.358723	0.416564	-8.58004	1.25045e-17	1.53762e-16	29.161
MRPS28	0.150323	0.186362	8.57811	1.2713e-17	1.56023e-16	29.1447
TPX2	0.202453	0.059421	8.57744	1.27861e-17	1.56617e-16	29.1391
GOLGA1	-0.0819687	-0.0275374	-8.57509	1.30464e-17	1.59498e-16	29.1193
TRPV6	0.222395	-0.472888	8.56443	1.42926e-17	1.74398e-16	29.0298
SDHA	0.107418	0.523922	8.56022	1.4817e-17	1.80449e-16	28.9944
EPB41L5	-0.121973	-0.120203	-8.55438	1.55749e-17	1.89094e-16	28.9455
VPS13A	-0.110541	-0.214692	-8.55429	1.55865e-17	1.89094e-16	28.9448
STK39	-0.194973	0.424848	-8.54736	1.65364e-17	2.00236e-16	28.8867
STK3	0.124191	0.426157	8.54138	1.74029e-17	2.10327e-16	28.8366
CCNI	-0.126351	2.0574	-8.53807	1.79005e-17	2.15707e-16	28.8089
NEIL3	0.121964	-0.502985	8.53788	1.79293e-17	2.15707e-16	28.8073
MARK3	-0.0769885	0.0333273	-8.53775	1.79501e-17	2.15707e-16	28.8062
DDOST	0.101891	0.948804	8.53351	1.86105e-17	2.23221e-16	28.7707
ZNF224	-0.0926896	-0.380911	-8.53316	1.86665e-17	2.23469e-16	28.7678
CCNE2	0.19299	-0.283921	8.52667	1.97268e-17	2.35719e-16	28.7136
LDHB	0.268038	0.685999	8.5179	2.12559e-17	2.53512e-16	28.6403
DUSP3	-0.0997997	0.820945	-8.51656	2.14993e-17	2.55935e-16	28.6292
PGM1	0.149176	0.740582	8.51357	2.20533e-17	2.62037e-16	28.6042
SOD1	0.124507	1.73939	8.50241	2.42474e-17	2.87569e-16	28.5111
CSE1L	0.138681	0.914055	8.49243	2.63913e-17	3.12412e-16	28.428
SFMBT1	-0.0766092	-0.12336	-8.48151	2.89535e-17	3.42104e-16	28.3371
SNRPD1	0.111832	-0.0437411	8.48053	2.9194e-17	3.44305e-16	28.329
ZNF266	-0.106159	-0.144743	-8.47965	2.94129e-17	3.46243e-16	28.3217
UBASH3A	-0.139301	-0.669328	-8.4786	2.9675e-17	3.48682e-16	28.313
CDK5RAP2	-0.111283	0.369737	-8.47684	3.01216e-17	3.53274e-16	28.2983
FNBP1	-0.121839	0.618974	-8.47627	3.02668e-17	3.53695e-16	28.2936
CCNB1	0.19529	-0.0815326	8.47626	3.0269e-17	3.53695e-16	28.2935
RAB5B	-0.0978119	1.25897	-8.4744	3.07489e-17	3.58642e-16	28.2781
CD2	-0.21628	0.0926329	-8.47332	3.1033e-17	3.61292e-16	28.2691
ALDOC	0.189264	0.0697107	8.4661	3.29863e-17	3.8333e-16	28.2092
MYO10	0.196715	-0.0458784	8.46421	3.35187e-17	3.88314e-16	28.1935
NIPSNAP1	0.120518	0.43852	8.46414	3.35376e-17	3.88314e-16	28.1929
CXCR3	-0.170564	-0.466841	-8.46262	3.39714e-17	3.9262e-16	28.1803
IQSEC1	-0.104838	0.24848	-8.46174	3.42273e-17	3.94858e-16	28.173
CHN1	0.133033	0.0687697	8.46083	3.44919e-17	3.97189e-16	28.1654
DHX29	-0.122775	0.435938	-8.45992	3.47561e-17	3.99506e-16	28.1579
RSRC1	0.147259	-0.0285064	8.45945	3.48945e-17	4.00371e-16	28.154
SEMA4D	-0.131984	0.271949	-8.44762	3.85637e-17	4.41673e-16	28.0559
CALB2	0.246847	-0.172519	8.44475	3.95097e-17	4.51692e-16	28.0322
RPS6KA5	-0.126521	0.11857	-8.44043	4.09749e-17	4.67601e-16	27.9964
CAMK2G	0.0872393	0.010318	8.43752	4.19918e-17	4.78345e-16	27.9724
RNASEH2A	0.126332	0.068695	8.43401	4.32532e-17	4.91831e-16	27.9434
PLAT	-0.330476	0.607379	-8.43267	4.3747e-17	4.96556e-16	27.9322
RAC3	0.137368	-0.293907	8.43096	4.43789e-17	5.02829e-16	27.9182
CCDC25	-0.116807	0.338817	-8.4292	4.50436e-17	5.0945e-16	27.9036
DEF6	-0.119818	-0.134516	-8.42498	4.66727e-17	5.26936e-16	27.8687
PIGN	-0.108973	0.152197	-8.42248	4.76663e-17	5.37199e-16	27.8481
SLC10A3	0.102309	0.255475	8.41508	5.07304e-17	5.70717e-16	27.7869
SH3BGRL	-0.255343	1.26745	-8.40579	5.48477e-17	6.15944e-16	27.7104
ZC3H7A	-0.0918986	0.370225	-8.39852	5.83031e-17	6.53593e-16	27.6505
SMOX	0.105462	-0.334062	8.39309	6.10203e-17	6.82847e-16	27.6058
PER3	-0.143234	-0.0744549	-8.38953	6.28686e-17	7.02291e-16	27.5765
GALNT14	0.187004	-0.508849	8.38813	6.36134e-17	7.09362e-16	27.565
COPS5	0.130657	0.919888	8.38697	6.42338e-17	7.15024e-16	27.5555
MAN2C1	-0.100145	0.108816	-8.38601	6.47527e-17	7.19538e-16	27.5476
ACTL6A	0.11856	0.363125	8.38166	6.7159e-17	7.44971e-16	27.5118
WDR48	-0.0926439	0.289319	-8.37775	6.93964e-17	7.68447e-16	27.4796
HSPA2	-0.286951	0.189659	-8.37501	7.10086e-17	7.8493e-16	27.4571
MUSK	0.0930764	-0.399697	8.37307	7.21689e-17	7.96368e-16	27.4412
ACP1	0.125646	0.792842	8.37086	7.35181e-17	8.09198e-16	27.4231
PSMD2	0.11314	1.05833	8.37075	7.35867e-17	8.09198e-16	27.4221
IDUA	-0.094021	-0.229849	-8.35752	8.21925e-17	9.02269e-16	27.3137
RTN1	-0.286272	-0.238795	-8.35711	8.24766e-17	9.03824e-16	27.3103
RASSF2	-0.142886	0.31726	-8.3454	9.09477e-17	9.94937e-16	27.2144
AURKB	0.153134	-0.19355	8.34387	9.21141e-17	1.00596e-15	27.2019
MCCC1	0.132785	0.290591	8.33765	9.70225e-17	1.05775e-15	27.151
APBB3	-0.109178	0.312511	-8.33324	1.00651e-16	1.09543e-15	27.115
RECQL4	0.174694	-0.39264	8.32847	1.04734e-16	1.13791e-15	27.076
HRAS	0.127097	0.19776	8.32402	1.08693e-16	1.1789e-15	27.0396
CSRP2	0.19856	-0.0706693	8.31722	1.15019e-16	1.24538e-15	26.9841
RALA	0.125076	0.861462	8.31627	1.15932e-16	1.25313e-15	26.9764
KIAA0101	0.162208	0.321599	8.31536	1.16812e-16	1.26049e-15	26.969
ATF4	0.118701	0.746428	8.31496	1.17201e-16	1.26255e-15	26.9657
CDKN2A	0.196321	-0.336722	8.3123	1.19817e-16	1.28854e-15	26.9441
CD79B	-0.153351	-0.178058	-8.30998	1.22159e-16	1.31092e-15	26.9251
SCN3A	0.136532	-0.372548	8.30983	1.22311e-16	1.31092e-15	26.9239
TROAP	0.10895	-0.173784	8.3087	1.23456e-16	1.32096e-15	26.9147
SOD2	0.205853	0.535208	8.30713	1.25085e-16	1.33613e-15	26.9019
STAT3	-0.136657	0.907964	-8.29025	1.43892e-16	1.53444e-15	26.7645
BRD3	-0.137675	0.471697	-8.28649	1.48449e-16	1.58038e-15	26.734
KYNU	0.213967	-0.31987	8.28305	1.52749e-16	1.62344e-15	26.706
CHIC2	0.102744	0.180276	8.27372	1.65024e-16	1.75096e-15	26.6302
SNRPA1	0.13278	0.681782	8.2681	1.72866e-16	1.83111e-15	26.5847
MAPK14	0.0725256	-0.176467	8.26359	1.79438e-16	1.89755e-15	26.5481
HPN	-0.187348	0.112834	-8.25891	1.86525e-16	1.96922e-15	26.5101
TGFBR3	-0.268164	0.411272	-8.25858	1.87032e-16	1.97129e-15	26.5075
CCND2	-0.146735	0.296248	-8.25573	1.9149e-16	2.01493e-15	26.4844
TOMM40	0.108194	0.638276	8.2279	2.40893e-16	2.53057e-15	26.2594
DRG1	0.0960093	0.615779	8.22632	2.44033e-16	2.55932e-15	26.2467
VIPR1	-0.140587	0.110116	-8.21112	2.76544e-16	2.8955e-15	26.1241
DFNB31	-0.117071	-0.265962	-8.20937	2.80552e-16	2.93262e-15	26.11
TRAF3IP3	-0.1514	-0.343405	-8.20851	2.82537e-16	2.94852e-15	26.103
RCN2	0.131415	0.59011	8.20314	2.95279e-16	3.07643e-15	26.0598
TCEAL4	-0.203581	1.3249	-8.20025	3.02376e-16	3.14521e-15	26.0365
PDAP1	0.104997	-0.0766408	8.18759	3.35464e-16	3.48367e-15	25.9347
PRKAB1	-0.102233	0.0852128	-8.18624	3.39197e-16	3.51668e-15	25.9239
UBE3A	-0.110879	0.733547	-8.1802	3.56389e-16	3.68889e-15	25.8754
STX7	0.0891866	0.0216712	8.17867	3.60898e-16	3.72948e-15	25.8631
CENPE	0.173242	-0.246907	8.17829	3.62006e-16	3.73485e-15	25.8601
KCTD12	-0.158585	0.462384	-8.1745	3.73402e-16	3.84616e-15	25.8297
FRZB	-0.20349	0.0940534	-8.17056	3.85633e-16	3.96571e-15	25.7981
EPS15	-0.0865818	0.184899	-8.16421	4.06194e-16	4.17039e-15	25.7472
ATP5J	0.103039	0.447009	8.16396	4.07037e-16	4.1723e-15	25.7452
VWF	-0.179785	1.16324	-8.16235	4.12408e-16	4.22053e-15	25.7324
QARS	-0.102973	1.38453	-8.16081	4.17661e-16	4.2674e-15	25.7199
CHORDC1	0.120372	-0.150376	8.15658	4.32347e-16	4.41036e-15	25.6861
SUPT16H	-0.0951625	0.940478	-8.15512	4.37505e-16	4.45581e-15	25.6745
FZD9	0.15066	-0.67935	8.15127	4.51493e-16	4.59091e-15	25.6436
MRPL17	0.101441	0.671339	8.14476	4.76122e-16	4.83359e-15	25.5916
PTPN7	-0.109658	-0.310667	-8.14247	4.85068e-16	4.91654e-15	25.5733
RBM28	0.0945106	-0.0266807	8.14157	4.88663e-16	4.94508e-15	25.5661
BTN3A1	-0.116523	-0.0448019	-8.13914	4.98424e-16	5.03583e-15	25.5467
CCT8	0.106517	0.423333	8.13741	5.05517e-16	5.09938e-15	25.5328
PHGDH	0.236899	0.619363	8.13205	5.28073e-16	5.31845e-15	25.4901
CHST10	-0.0962518	-0.123182	-8.12787	5.46363e-16	5.49393e-15	25.4567
GPI	0.146252	1.23404	8.11979	5.83482e-16	5.8579e-15	25.3923
SLAMF1	-0.0999735	-0.469612	-8.11841	5.90052e-16	5.9145e-15	25.3813
MDH1	0.100004	1.25299	8.11814	5.91357e-16	5.91823e-15	25.3792
HMMR	0.139052	-0.224546	8.11426	6.103e-16	6.0982e-15	25.3483
LYL1	-0.110922	0.0804256	-8.11243	6.19426e-16	6.17965e-15	25.3337
TFF3	-0.484967	1.23955	-8.1054	6.55858e-16	6.53284e-15	25.2777
TARBP1	-0.133525	0.225846	-8.10327	6.67301e-16	6.6364e-15	25.2608
EBAG9	0.109062	0.587412	8.10137	6.77642e-16	6.7287e-15	25.2457
DLD	0.118537	0.322936	8.10075	6.81065e-16	6.75212e-15	25.2408
BCOR	-0.119629	0.148396	-8.09725	7.00699e-16	6.93593e-15	25.2129
TP53BP1	-0.0888677	0.271696	-8.09165	7.33253e-16	7.24687e-15	25.1684
CD44	-0.190631	0.926807	-8.08967	7.45083e-16	7.35234e-15	25.1527
KCNG1	0.103172	-0.656626	8.08588	7.68309e-16	7.56975e-15	25.1227
GLUD1	-0.129758	1.06721	-8.08305	7.86155e-16	7.73357e-15	25.1002
NUP155	0.115104	0.192254	8.08198	7.92961e-16	7.78845e-15	25.0917
SPARCL1	-0.23619	1.31055	-8.07876	8.1394e-16	7.98215e-15	25.0661
COX7A2	0.11958	1.42975	8.06567	9.04784e-16	8.85935e-15	24.9625
CLK2	-0.0972255	0.33405	-8.06215	9.3089e-16	9.10092e-15	24.9346
RIT1	0.111361	-0.112843	8.05661	9.73494e-16	9.5028e-15	24.8907
NPAT	-0.0856681	-0.21408	-8.05605	9.77916e-16	9.5313e-15	24.8863
MRPL48	0.100656	-0.02574	8.05076	1.02052e-15	9.93125e-15	24.8445
GPR18	-0.158639	-0.523671	-8.04685	1.05321e-15	1.02337e-14	24.8136
STAMBP	0.0815982	0.291028	8.04343	1.08268e-15	1.0504e-14	24.7866
CD3G	-0.143114	-0.497246	-8.0428	1.08822e-15	1.05416e-14	24.7816
UPP1	0.133861	-0.0147384	8.04229	1.09262e-15	1.05681e-14	24.7776
ARHGAP15	-0.147986	0.0143021	-8.03164	1.19048e-15	1.14971e-14	24.6936
SLC35C1	0.0955599	-0.1157	8.03011	1.20527e-15	1.16222e-14	24.6815
PGR	-0.321309	-0.174281	-8.02119	1.29492e-15	1.24677e-14	24.6112
CTDSP2	-0.0972205	1.12393	-8.02035	1.30367e-15	1.2533e-14	24.6046
DVL1	0.0927206	-0.157786	7.99606	1.58434e-15	1.52082e-14	24.4136
E2F5	0.151749	-0.183887	7.99482	1.60009e-15	1.53362e-14	24.404
RNF38	-0.0892137	0.353563	-7.98897	1.67694e-15	1.60485e-14	24.358
AP2S1	0.107385	0.887781	7.9887	1.68058e-15	1.60592e-14	24.3559
LCT	0.134546	-0.586691	7.98707	1.70267e-15	1.62457e-14	24.3431
ESPL1	0.124045	-0.242671	7.98583	1.71964e-15	1.63831e-14	24.3334
USP47	-0.104553	0.114734	-7.98505	1.73034e-15	1.64603e-14	24.3273
SLC7A8	-0.177039	0.521834	-7.98275	1.76244e-15	1.67405e-14	24.3093
ZMYND11	-0.117814	1.11737	-7.97806	1.82993e-15	1.73557e-14	24.2725
TIMM8A	0.0792858	-0.44857	7.97314	1.90338e-15	1.80253e-14	24.2339
NKG7	-0.221714	-0.139504	-7.96502	2.03086e-15	1.92039e-14	24.1705
PPAT	0.135031	0.00162321	7.96286	2.06621e-15	1.95091e-14	24.1536
F7	-0.157732	-0.400628	-7.96154	2.08812e-15	1.96824e-14	24.1432
MFN1	0.102532	-0.114624	7.96138	2.09077e-15	1.96824e-14	24.142
MRPL35	0.114202	0.392968	7.94711	2.34283e-15	2.20226e-14	24.0305
NDUFB3	0.099615	0.784122	7.9426	2.42851e-15	2.27942e-14	23.9953
CEBPB	0.14475	1.17067	7.93835	2.51204e-15	2.35434e-14	23.9622
H2AFX	0.132939	0.379391	7.93569	2.56584e-15	2.40122e-14	23.9415
ALDH6A1	-0.1202	0.207936	-7.93296	2.62206e-15	2.45022e-14	23.9202
LAMP2	0.125863	0.888329	7.93013	2.68183e-15	2.50238e-14	23.8982
ZNF324	-0.107208	-0.104395	-7.9283	2.72118e-15	2.53537e-14	23.8839
NELL2	-0.282008	0.0780877	-7.9253	2.7868e-15	2.5927e-14	23.8606
POLR1C	0.0778363	0.334675	7.92468	2.80048e-15	2.60162e-14	23.8558
SHC3	0.090276	-0.695611	7.91609	2.99821e-15	2.78123e-14	23.789
PRPF8	-0.106827	1.2457	-7.91501	3.02403e-15	2.80109e-14	23.7806
TTC3	-0.138582	1.56029	-7.91406	3.04697e-15	2.81822e-14	23.7732
VPS35	0.104841	1.08222	7.90604	3.24708e-15	2.99894e-14	23.7109
FADS2	0.279518	-0.188118	7.90557	3.25935e-15	3.00589e-14	23.7072
MYO1F	-0.0891482	-0.246361	-7.90493	3.27579e-15	3.01434e-14	23.7023
STAT6	-0.105834	0.449588	-7.90485	3.27801e-15	3.01434e-14	23.7016
CD1C	-0.165049	-0.436987	-7.90412	3.29707e-15	3.02748e-14	23.6959
AP2B1	-0.149687	0.710071	-7.90188	3.35592e-15	3.07707e-14	23.6786
NPY1R	-0.495613	-0.527245	-7.90042	3.39502e-15	3.10842e-14	23.6673
SCCPDH	-0.202546	0.356144	-7.89876	3.4401e-15	3.14517e-14	23.6543
USP21	-0.0890153	0.12934	-7.88885	3.72079e-15	3.39689e-14	23.5775
AKAP11	-0.107197	0.258876	-7.88786	3.75016e-15	3.41879e-14	23.5698
MLLT11	0.151215	0.0647521	7.88188	3.93174e-15	3.57918e-14	23.5235
NCOA1	-0.103175	0.494544	-7.87901	4.02208e-15	3.65618e-14	23.5013
LRP2	-0.297291	-0.0210992	-7.87836	4.0428e-15	3.66975e-14	23.4963
USP4	-0.0777802	0.254359	-7.87466	4.16245e-15	3.77296e-14	23.4677
MCAM	0.114768	-0.140714	7.86483	4.49856e-15	4.0718e-14	23.3917
SH2D1A	-0.133446	-0.435874	-7.85606	4.82075e-15	4.35722e-14	23.324
ZC3H11A	-0.108304	0.3708	-7.85319	4.93095e-15	4.44863e-14	23.3018
TYRO3	0.083866	-0.425852	7.85306	4.93591e-15	4.44863e-14	23.3009
TMC5	-0.340773	-0.2187	-7.85273	4.9486e-15	4.45374e-14	23.2983
FANCA	0.10769	-0.57046	7.85182	4.98422e-15	4.47944e-14	23.2913
CRADD	0.0947344	-0.090542	7.84721	5.16867e-15	4.63864e-14	23.2558
RPL6	0.118288	1.10459	7.84188	5.38999e-15	4.83043e-14	23.2147
STAT2	-0.0944551	0.929523	-7.84024	5.46018e-15	4.88644e-14	23.202
MT1G	0.208174	0.222488	7.83976	5.48078e-15	4.89797e-14	23.1984
PPWD1	-0.0965645	-0.0644522	-7.83886	5.51956e-15	4.92568e-14	23.1915
FBXO11	-0.0954318	0.388269	-7.83689	5.60604e-15	4.99583e-14	23.1762
SNN	0.0968574	-0.186718	7.83601	5.64504e-15	5.02353e-14	23.1694
ZNF230	-0.0918999	-0.529728	-7.83543	5.67046e-15	5.03909e-14	23.165
ADORA2B	0.127467	-0.480376	7.83192	5.82915e-15	5.17286e-14	23.138
PSMA4	0.106826	0.939484	7.81845	6.47953e-15	5.74199e-14	23.0345
VAMP1	-0.112873	-0.0905531	-7.81821	6.49209e-15	5.74509e-14	23.0326
PSMD8	0.111106	0.727735	7.81744	6.53116e-15	5.77162e-14	23.0267
SLC35A2	0.0805942	0.431055	7.8143	6.69422e-15	5.90748e-14	23.0026
ADCY9	-0.115665	0.0726033	-7.81351	6.73564e-15	5.93578e-14	22.9965
CDC25C	0.0951614	-0.418341	7.81033	6.90582e-15	6.07731e-14	22.9721
PEX11B	-0.0972156	0.777835	-7.80707	7.08443e-15	6.22586e-14	22.9471
FCHSD2	-0.105159	0.0918825	-7.80414	7.24915e-15	6.3618e-14	22.9246
MAGI1	-0.116604	-0.32709	-7.80004	7.4853e-15	6.55997e-14	22.8933
PPP2R5E	-0.0917943	0.648844	-7.7996	7.51123e-15	6.57362e-14	22.8899
HELZ	-0.113357	0.325711	-7.7992	7.53449e-15	6.58489e-14	22.8868
FLRT2	-0.161096	-0.388123	-7.79615	7.71684e-15	6.73498e-14	22.8634
GUK1	0.116152	1.23763	7.78996	8.09944e-15	7.05919e-14	22.8161
PCNX	-0.0827811	0.167149	-7.78963	8.12054e-15	7.06788e-14	22.8135
CMAS	0.118878	0.260009	7.78545	8.39025e-15	7.29262e-14	22.7815
TRIM33	-0.09012	0.503845	-7.77278	9.26291e-15	8.0401e-14	22.6847
ENTPD5	-0.141964	-0.132897	-7.7717	9.34107e-15	8.09687e-14	22.6765
SUPT6H	-0.131148	0.193671	-7.76823	9.5975e-15	8.30779e-14	22.65
ALDOA	0.171677	2.19167	7.75882	1.03277e-14	8.92771e-14	22.5782
AP3B1	-0.071307	0.58665	-7.75064	1.1007e-14	9.50193e-14	22.5159
DHX8	-0.103325	-0.0362728	-7.74887	1.116e-14	9.62096e-14	22.5024
SELL	-0.182737	-0.239236	-7.74454	1.15417e-14	9.93649e-14	22.4695
APH1B	-0.100766	0.126431	-7.73137	1.27859e-14	1.09928e-13	22.3693
VPS13C	-0.12007	0.165002	-7.72862	1.30615e-14	1.12145e-13	22.3484
HIST1H2AB	0.0939198	-0.665292	7.72345	1.35956e-14	1.16522e-13	22.3092
BAX	0.111348	-0.10695	7.72334	1.3608e-14	1.16522e-13	22.3083
C5	-0.103463	-0.170217	-7.70218	1.60314e-14	1.37088e-13	22.1479
ME3	-0.135264	-0.110002	-7.7	1.63035e-14	1.39227e-13	22.1315
STAT4	-0.11745	-0.249179	-7.69968	1.63445e-14	1.39389e-13	22.129
BCAT1	0.143294	-0.401283	7.698	1.6558e-14	1.40821e-13	22.1163
NPR3	0.131276	-0.45498	7.69793	1.65667e-14	1.40821e-13	22.1158
MEOX1	-0.15919	-0.375588	-7.69784	1.65789e-14	1.40821e-13	22.1151
GNAI1	0.112531	-0.468967	7.6962	1.67892e-14	1.42416e-13	22.1028
CIC	-0.0877177	0.193454	-7.69478	1.69751e-14	1.43801e-13	22.092
LY9	-0.106116	-0.586245	-7.69425	1.70442e-14	1.44194e-13	22.088
TNFRSF13B	-0.0920133	-0.469145	-7.69169	1.73847e-14	1.46879e-13	22.0687
PSMB1	0.0926728	1.49469	7.68931	1.77077e-14	1.49409e-13	22.0506
PCMT1	0.110034	0.958866	7.68515	1.82864e-14	1.54087e-13	22.0192
IL18R1	-0.110216	-0.469963	-7.67742	1.94092e-14	1.63331e-13	21.9609
PAK1IP1	0.112486	0.167304	7.67629	1.95793e-14	1.64544e-13	21.9524
YME1L1	0.103563	0.673503	7.67559	1.9685e-14	1.65213e-13	21.9471
APEX2	0.08611	0.342583	7.67425	1.98902e-14	1.66715e-13	21.9369
AK5	-0.170707	-0.394885	-7.67374	1.99687e-14	1.67152e-13	21.9331
KCTD5	0.10186	0.401435	7.67276	2.01204e-14	1.682e-13	21.9257
ANXA9	-0.209067	-0.0971611	-7.6696	2.06158e-14	1.72114e-13	21.9019
NFKBIA	-0.117068	1.34311	-7.66506	2.13491e-14	1.78003e-13	21.8677
MTUS1	-0.162137	0.160495	-7.66409	2.15092e-14	1.79102e-13	21.8604
ZNF211	-0.093305	-0.0863099	-7.65407	2.32332e-14	1.93204e-13	21.785
MTDH	0.129309	0.655456	7.65306	2.34147e-14	1.94458e-13	21.7774
CD5	-0.0964217	-0.452623	-7.65141	2.37144e-14	1.9669e-13	21.7649
PXMP2	0.123427	0.0704729	7.6481	2.43246e-14	2.01488e-13	21.7401
SNRPG	0.108518	1.10117	7.64414	2.50763e-14	2.07444e-13	21.7103
WAS	-0.102111	0.0923103	-7.64361	2.51783e-14	2.08016e-13	21.7063
ADSL	0.0870521	0.672441	7.64209	2.54741e-14	2.10186e-13	21.6949
TDO2	0.186501	-0.329751	7.63775	2.6338e-14	2.17032e-13	21.6623
CCL22	-0.132683	-0.444998	-7.6372	2.64482e-14	2.17658e-13	21.6582
UCHL5	0.102468	0.200459	7.6354	2.68166e-14	2.20404e-13	21.6447
LMNB2	0.116342	0.465207	7.63182	2.75627e-14	2.26243e-13	21.6178
SYTL2	-0.18424	0.664996	-7.62972	2.80099e-14	2.29616e-13	21.6021
MTIF2	0.0905652	0.393653	7.6294	2.80797e-14	2.29891e-13	21.5996
RPL39L	0.161247	0.161595	7.62395	2.92766e-14	2.39382e-13	21.5588
PDCD2	0.0962201	0.31741	7.6236	2.9356e-14	2.39722e-13	21.5562
U2AF1	0.0868651	0.160882	7.61938	3.03194e-14	2.4727e-13	21.5246
SPEN	-0.106077	0.605609	-7.61828	3.05765e-14	2.49047e-13	21.5163
RPS6KB2	0.089384	0.56267	7.61477	3.14086e-14	2.55497e-13	21.4901
ZZEF1	-0.0816927	0.107036	-7.61379	3.16441e-14	2.57083e-13	21.4828
LDHA	0.13105	2.10671	7.61342	3.1736e-14	2.575e-13	21.4799
TIMM10	0.0993134	0.453803	7.61263	3.1927e-14	2.58719e-13	21.474
UQCRFS1	0.111291	1.04044	7.60899	3.28279e-14	2.65671e-13	21.4468
ALOX5	-0.116589	0.28138	-7.60883	3.28686e-14	2.65671e-13	21.4456
ELOVL2	-0.248807	-0.310505	-7.60094	3.49121e-14	2.81804e-13	21.3866
MEF2D	-0.0941965	0.277193	-7.60079	3.49535e-14	2.81804e-13	21.3855
TLK1	-0.112962	0.189476	-7.5988	3.54878e-14	2.85749e-13	21.3706
CCL8	0.188156	0.106932	7.59482	3.65819e-14	2.94185e-13	21.3409
E2F1	0.104885	-0.490912	7.59366	3.69089e-14	2.9644e-13	21.3322
LOX	0.150179	0.0120896	7.58759	3.86582e-14	3.10096e-13	21.2869
EIF2S2	0.107033	-0.177734	7.5867	3.89196e-14	3.11799e-13	21.2804
TBX3	-0.252181	0.198363	-7.58101	4.06457e-14	3.25217e-13	21.2379
MTCH2	0.0978724	0.0657287	7.57943	4.1139e-14	3.28749e-13	21.2261
S100A10	0.165252	1.45135	7.56318	4.65548e-14	3.7156e-13	21.1052
PRUNE	-0.104238	0.254319	-7.56087	4.73783e-14	3.77657e-13	21.088
MARS	0.0869331	0.275412	7.56034	4.75695e-14	3.78706e-13	21.0841
MRPS22	0.0693599	0.508974	7.5535	5.01099e-14	3.9843e-13	21.0332
MED12	-0.0698072	0.115865	-7.54843	5.20758e-14	4.13543e-13	20.9956
RGS5	-0.228329	0.303599	-7.54705	5.26224e-14	4.17362e-13	20.9854
BTF3	-0.119669	2.07951	-7.54676	5.27399e-14	4.17771e-13	20.9832
ICAM3	-0.106009	0.228604	-7.54	5.55146e-14	4.39202e-13	20.9331
SEMA4A	-0.0922266	0.259316	-7.53557	5.74091e-14	4.53625e-13	20.9003
HPRT1	0.11639	0.552972	7.53291	5.85803e-14	4.62303e-13	20.8805
HOXD13	0.0777432	-0.648186	7.53233	5.8835e-14	4.63736e-13	20.8763
NR2F2	-0.165151	0.401986	-7.52721	6.11604e-14	4.81467e-13	20.8384
AHSA1	0.0957233	0.574541	7.5255	6.19606e-14	4.87162e-13	20.8257
GGA2	-0.0877745	0.539757	-7.51934	6.49148e-14	5.09758e-13	20.7801
FAF1	0.0854851	0.0493419	7.51148	6.88895e-14	5.40301e-13	20.722
SYT17	-0.201556	0.0124644	-7.51057	6.93648e-14	5.43358e-13	20.7153
RAD51AP1	0.142318	-0.165456	7.51027	6.95217e-14	5.43915e-13	20.7131
LAMA3	-0.222935	-0.0709597	-7.50761	7.09316e-14	5.54263e-13	20.6935
GMNN	0.147739	-0.121141	7.50288	7.35077e-14	5.73686e-13	20.6586
FCN2	0.0915649	-0.64426	7.49638	7.72037e-14	6.01791e-13	20.6106
FCER1A	-0.205023	-0.211365	-7.49195	7.98259e-14	6.21467e-13	20.578
NRAS	0.117819	0.119394	7.49039	8.07716e-14	6.28058e-13	20.5665
ACADSB	-0.192038	-0.0782026	-7.48044	8.70534e-14	6.76075e-13	20.4933
IBSP	0.125988	-0.598411	7.46935	9.46268e-14	7.33994e-13	20.4117
MAP1LC3B	0.0893616	0.492351	7.46433	9.82604e-14	7.61248e-13	20.3749
IMPDH1	0.103669	0.608255	7.45943	1.01946e-13	7.88841e-13	20.3389
NUP93	0.143728	0.227451	7.44281	1.1547e-13	8.92395e-13	20.2172
ZCCHC8	-0.0761617	0.0851838	-7.44228	1.15926e-13	8.94831e-13	20.2133
FCN3	0.0966548	-0.315673	7.43888	1.1892e-13	9.16827e-13	20.1884
RNF40	-0.0856147	0.426287	-7.43563	1.21843e-13	9.38222e-13	20.1647
ADORA3	0.112219	-0.212695	7.43335	1.23944e-13	9.53244e-13	20.148
PLCB2	-0.0943494	-0.227668	-7.43283	1.24427e-13	9.55795e-13	20.1442
CACNA1D	-0.104546	-0.412201	-7.42979	1.27291e-13	9.76618e-13	20.1219
FARP2	-0.0854321	-0.219943	-7.42619	1.30764e-13	1.00205e-12	20.0956
CBX6	-0.141228	0.436399	-7.42569	1.31245e-13	1.00453e-12	20.092
SNX3	0.103398	1.27723	7.42525	1.31677e-13	1.00661e-12	20.0888
PTGDS	-0.182555	0.0695479	-7.42028	1.36666e-13	1.04349e-12	20.0525
SMAD3	-0.0943182	0.134085	-7.40877	1.48917e-13	1.13567e-12	19.9686
IMPDH2	-0.141996	1.29104	-7.40047	1.58423e-13	1.20672e-12	19.9081
SLC4A7	-0.142686	0.163347	-7.39611	1.63656e-13	1.24508e-12	19.8764
GP2	-0.20082	-0.0983888	-7.39525	1.64702e-13	1.25154e-12	19.8701
NUP214	-0.0649506	0.430491	-7.39151	1.69352e-13	1.28534e-12	19.8429
CDC25A	0.128899	-0.54745	7.38538	1.77247e-13	1.34364e-12	19.7984
DUSP9	0.175154	-0.78603	7.38333	1.79973e-13	1.36269e-12	19.7835
OSM	0.0771575	-0.658719	7.37815	1.87033e-13	1.41445e-12	19.7459
LIMK2	0.110549	0.00713964	7.37077	1.97576e-13	1.49241e-12	19.6923
MYC	0.217853	0.565327	7.3646	2.06822e-13	1.56039e-12	19.6476
GMPR2	-0.0983549	0.589811	-7.36302	2.09252e-13	1.57684e-12	19.6362
MID1	0.192685	-0.15558	7.3549	2.22235e-13	1.6727e-12	19.5774
DRD2	0.0688729	-0.513152	7.3513	2.28236e-13	1.71583e-12	19.5514
PSTPIP1	-0.0948707	-0.41772	-7.34465	2.39745e-13	1.80021e-12	19.5033
PGBD5	0.191513	-0.5787	7.34397	2.40959e-13	1.80719e-12	19.4984
EPHX2	-0.199043	-0.0963346	-7.34116	2.46026e-13	1.84302e-12	19.4781
PPP1R3C	-0.223677	0.246599	-7.34012	2.47921e-13	1.85502e-12	19.4706
COL13A1	0.0862018	-0.4967	7.33694	2.53811e-13	1.89686e-12	19.4476
COL14A1	-0.212708	0.0432182	-7.33146	2.64302e-13	1.97294e-12	19.4081
THUMPD1	-0.103702	0.451308	-7.33004	2.67081e-13	1.99133e-12	19.3978
SPG21	0.0770732	0.448932	7.32954	2.68059e-13	1.99629e-12	19.3943
MMP15	0.139295	-0.329098	7.32669	2.73777e-13	2.03647e-12	19.3737
MRPS33	0.100578	0.614978	7.32617	2.74823e-13	2.04186e-12	19.3699
RNF11	0.102611	0.287609	7.32459	2.78045e-13	2.06338e-12	19.3585
PLCL2	-0.102309	-0.122164	-7.32213	2.83131e-13	2.09868e-12	19.3408
ICT1	0.115443	0.270391	7.32157	2.84304e-13	2.10491e-12	19.3368
CTSO	-0.101222	0.335126	-7.31892	2.89912e-13	2.14393e-12	19.3177
PPIE	0.0816405	0.122254	7.31668	2.94741e-13	2.1771e-12	19.3016
SLC13A3	0.106182	-0.636826	7.31321	3.02374e-13	2.23089e-12	19.2766
GOLGB1	-0.124606	0.63904	-7.30961	3.10501e-13	2.28819e-12	19.2507
RPP38	0.0703373	-0.162231	7.30636	3.18005e-13	2.34077e-12	19.2274
CASC1	-0.132427	-0.400956	-7.30469	3.21945e-13	2.36702e-12	19.2154
EPHB4	0.112745	0.543813	7.30403	3.23506e-13	2.37574e-12	19.2106
WWP2	0.0730355	-0.23593	7.30227	3.27737e-13	2.40404e-12	19.1979
RBM15B	-0.0672132	0.0743891	-7.29716	3.40286e-13	2.49321e-12	19.1612
MAPK12	0.0929732	-0.476111	7.29577	3.43778e-13	2.51486e-12	19.1513
CDH15	0.0876829	-0.582553	7.29567	3.44035e-13	2.51486e-12	19.1505
SPCS1	-0.103291	1.26063	-7.2946	3.46747e-13	2.53177e-12	19.1429
ST14	0.128338	0.46651	7.29398	3.48319e-13	2.54033e-12	19.1385
CLDN4	0.138073	0.138459	7.29059	3.57113e-13	2.60147e-12	19.1141
BLK	-0.087369	-0.705321	-7.28823	3.63342e-13	2.64382e-12	19.0972
CCL20	0.134443	-0.580758	7.28777	3.64579e-13	2.64978e-12	19.0939
TUSC2	-0.0791606	-0.0994419	-7.28742	3.65521e-13	2.65358e-12	19.0914
CAP2	-0.168394	0.383417	-7.28598	3.69396e-13	2.67865e-12	19.0811
UBTF	-0.0847253	0.207144	-7.28442	3.73668e-13	2.70654e-12	19.0698
BTD	-0.111005	-0.0577145	-7.27567	3.98435e-13	2.88264e-12	19.0072
FBLN1	-0.168253	1.16199	-7.27442	4.02095e-13	2.9058e-12	18.9982
CHAF1B	0.148228	-0.252453	7.27371	4.04191e-13	2.91763e-12	18.9932
PSMD10	0.093454	0.348799	7.27136	4.11214e-13	2.96495e-12	18.9763
SLC2A1	0.137551	0.360881	7.26923	4.17664e-13	3.00804e-12	18.9611
CORO1C	0.11228	0.343374	7.2684	4.20209e-13	3.02293e-12	18.9552
APOBEC3G	-0.11761	-0.087649	-7.26469	4.31801e-13	3.10281e-12	18.9286
PRKCD	-0.128796	0.700493	-7.26344	4.35772e-13	3.1278e-12	18.9197
MCRS1	0.064716	-0.115203	7.25594	4.6034e-13	3.3004e-12	18.8661
ZNF83	-0.119565	0.163728	-7.25255	4.71881e-13	3.37933e-12	18.842
GSTM1	-0.197628	-0.108768	-7.25113	4.76808e-13	3.41076e-12	18.8318
DLC1	-0.124726	0.0335675	-7.25004	4.80624e-13	3.43419e-12	18.824
RUNX1T1	-0.117386	-0.420575	-7.24949	4.82572e-13	3.44423e-12	18.8201
PIK3CD	-0.0821397	-0.207767	-7.2489	4.84632e-13	3.45505e-12	18.8159
C7	-0.184079	-0.385869	-7.24727	4.9043e-13	3.49246e-12	18.8043
ARID4B	-0.111	0.0616977	-7.24692	4.91687e-13	3.49748e-12	18.8018
SHCBP1	0.122256	-0.557862	7.24381	5.02998e-13	3.57174e-12	18.7796
SAFB2	-0.0695577	0.238425	-7.24374	5.03252e-13	3.57174e-12	18.7791
L1CAM	0.111524	-0.543045	7.24068	5.14625e-13	3.64837e-12	18.7573
MTR	-0.091252	0.122499	-7.23864	5.22337e-13	3.69892e-12	18.7428
BANP	0.0837898	0.0760698	7.23612	5.32043e-13	3.76345e-12	18.7248
LAMA2	-0.145622	-0.131395	-7.23361	5.4185e-13	3.82855e-12	18.707
MRPL11	0.0874824	0.434377	7.23198	5.48332e-13	3.87004e-12	18.6953
GALNT10	-0.145415	0.331916	-7.22741	5.66882e-13	3.99652e-12	18.6629
HBEGF	0.0954048	-0.226346	7.22557	5.74562e-13	4.04616e-12	18.6497
ENPEP	0.0895191	-0.366276	7.22453	5.7891e-13	4.07226e-12	18.6424
PLXNB1	-0.114685	0.283081	-7.22019	5.9748e-13	4.19824e-12	18.6115
DPAGT1	0.0894368	0.00393356	7.21979	5.99232e-13	4.20589e-12	18.6087
APAF1	-0.0648058	0.0064634	-7.21799	6.0713e-13	4.25662e-12	18.5959
ATRX	-0.101638	-0.0317235	-7.21758	6.08936e-13	4.26456e-12	18.593
BTN3A2	-0.152844	0.146391	-7.21734	6.10023e-13	4.26747e-12	18.5913
GLYAT	0.0582596	-0.585332	7.2139	6.25486e-13	4.37083e-12	18.5668
SERPINB1	-0.102511	0.416142	-7.21221	6.33209e-13	4.41992e-12	18.5548
LCP1	-0.174608	1.00606	-7.21108	6.38425e-13	4.44764e-12	18.5468
AP3S1	0.111689	0.499967	7.21105	6.38581e-13	4.44764e-12	18.5466
ITM2B	-0.113159	1.69	-7.20494	6.67572e-13	4.64446e-12	18.5032
KLF12	-0.0761546	-0.420383	-7.1989	6.97457e-13	4.84706e-12	18.4605
NDUFA9	0.0952305	0.603471	7.1955	7.14911e-13	4.96292e-12	18.4364
GBF1	-0.0747252	0.240607	-7.19192	7.33703e-13	5.08781e-12	18.411
SEMA5A	-0.118182	-0.172962	-7.18132	7.92298e-13	5.48813e-12	18.336
AK2	0.0873955	0.590114	7.17746	8.14706e-13	5.6372e-12	18.3088
SLC39A4	0.152871	-0.417809	7.17707	8.17002e-13	5.64609e-12	18.3061
MRPS31	-0.0792799	0.270039	-7.17694	8.1777e-13	5.64609e-12	18.3051
KLK6	0.198843	-0.631891	7.17655	8.20101e-13	5.65602e-12	18.3024
LSM6	0.0702102	-0.383313	7.1749	8.2995e-13	5.71773e-12	18.2907
POLR3G	0.0848845	-0.607651	7.17338	8.39153e-13	5.77487e-12	18.2799
PQBP1	0.0801374	0.317879	7.1681	8.71784e-13	5.99292e-12	18.2427
COX5B	0.0926072	1.3068	7.16657	8.81486e-13	6.05306e-12	18.2319
STAM	0.0771295	0.122661	7.16449	8.94815e-13	6.13795e-12	18.2173
AMPD1	-0.080031	-0.549717	-7.16107	9.17216e-13	6.28481e-12	18.1931
GPR132	-0.0798559	-0.686927	-7.15935	9.28686e-13	6.35654e-12	18.181
PTTG2	0.096555	-0.402575	7.158	9.37753e-13	6.41168e-12	18.1715
CHEK2	0.0926195	-0.257987	7.15723	9.42996e-13	6.44059e-12	18.1661
FBXO34	-0.0621811	0.173512	-7.1564	9.48632e-13	6.47212e-12	18.1603
SPINK1	0.123651	-0.608848	7.1517	9.81386e-13	6.68839e-12	18.1271
AKAP8	-0.0653494	0.204048	-7.1493	9.98545e-13	6.79803e-12	18.1102
SMS	0.121795	0.745497	7.14755	1.0112e-12	6.87681e-12	18.0979
RGS20	0.112977	-0.700263	7.14595	1.02294e-12	6.94918e-12	18.0867
RAB27B	-0.155071	0.326377	-7.1452	1.02843e-12	6.97904e-12	18.0814
EZH2	0.141939	-0.22113	7.14083	1.06135e-12	7.19475e-12	18.0507
FN1	0.244215	1.44582	7.13844	1.07981e-12	7.31208e-12	18.0338
HSD17B6	0.142337	-0.28553	7.13192	1.13167e-12	7.65506e-12	17.9881
MNT	-0.0804646	0.182397	-7.12913	1.15458e-12	7.80171e-12	17.9685
NIT2	0.0897182	0.503131	7.12142	1.22041e-12	8.23774e-12	17.9144
ATP1B1	-0.195639	1.05491	-7.11587	1.27001e-12	8.56345e-12	17.8755
HOMER1	0.148539	-0.501148	7.10689	1.35453e-12	9.12366e-12	17.8127
ACSL5	-0.110621	0.0988729	-7.10609	1.36228e-12	9.16611e-12	17.8071
GADD45GIP1	0.0867623	-0.480887	7.09695	1.4545e-12	9.7763e-12	17.7432
SLC35B1	0.138151	0.716302	7.09427	1.48269e-12	9.95521e-12	17.7244
SMARCE1	-0.106927	0.504947	-7.09308	1.49538e-12	1.00298e-11	17.7161
PRPF4B	-0.0858166	0.0885684	-7.09277	1.49867e-12	1.00413e-11	17.714
LAD1	0.203633	0.439165	7.08774	1.55362e-12	1.03985e-11	17.6788
CD4	-0.090997	-0.0481559	-7.08276	1.60993e-12	1.07639e-11	17.6441
ARHGEF6	-0.140775	0.566534	-7.08215	1.61698e-12	1.07997e-11	17.6398
CDK8	0.0830487	-0.356589	7.07523	1.6988e-12	1.13342e-11	17.5917
PDE6B	-0.124655	-0.580647	-7.07051	1.75708e-12	1.17108e-11	17.5588
MTHFR	-0.0781304	-0.277716	-7.06437	1.8357e-12	1.2222e-11	17.5161
ARHGEF2	-0.095557	0.936054	-7.06397	1.84099e-12	1.22443e-11	17.5133
RIOK3	0.0909981	0.160552	7.06321	1.85102e-12	1.22981e-11	17.508
PHEX	0.0862006	-0.507889	7.06286	1.85559e-12	1.23156e-11	17.5056
DVL2	-0.0682943	-0.108665	-7.06149	1.87384e-12	1.24237e-11	17.496
COLEC11	0.0901957	-0.539154	7.06099	1.88054e-12	1.24551e-11	17.4925
KRT16	0.251348	-0.541502	7.05775	1.92443e-12	1.27326e-11	17.47
PSMA5	0.0900363	1.09606	7.05552	1.95517e-12	1.29224e-11	17.4546
PFDN5	-0.100821	1.61647	-7.05445	1.97016e-12	1.3008e-11	17.4471
LASP1	-0.156034	1.77699	-7.05244	1.99859e-12	1.31819e-11	17.4331
INPP4B	-0.163339	0.160291	-7.04554	2.09913e-12	1.38307e-11	17.3853
ST6GALNAC2	-0.185471	-0.0315525	-7.04447	2.11513e-12	1.39217e-11	17.3779
EFHC1	-0.130748	-0.0920852	-7.04051	2.17558e-12	1.43047e-11	17.3504
SCGB2A2	-0.621342	0.9182	-7.0391	2.19736e-12	1.4433e-11	17.3407
JAG1	-0.113383	0.0341016	-7.0379	2.21621e-12	1.45417e-11	17.3323
VPS41	0.0660343	-0.239103	7.03619	2.24336e-12	1.47047e-11	17.3204
CELSR2	-0.187917	0.379037	-7.03361	2.28484e-12	1.49611e-11	17.3026
RHOT2	-0.097763	0.445831	-7.02441	2.43889e-12	1.59533e-11	17.2389
NARF	0.103738	0.300199	7.02321	2.45983e-12	1.60738e-11	17.2306
ARHGEF1	-0.0808862	0.0249068	-7.02222	2.47703e-12	1.61695e-11	17.2238
LSM7	0.0815257	0.705816	7.02111	2.49662e-12	1.62806e-11	17.2161
NEK4	-0.0936445	-0.340072	-7.01933	2.52832e-12	1.64704e-11	17.2038
DNM1L	0.095667	0.0370281	7.01905	2.53338e-12	1.64865e-11	17.2019
GLUL	-0.179637	0.841614	-7.01853	2.5427e-12	1.65301e-11	17.1983
ME2	0.104268	0.0785011	7.01392	2.6271e-12	1.70613e-11	17.1664
ATAD2	0.160397	0.126341	7.01372	2.63085e-12	1.70682e-11	17.165
USP10	0.0891991	0.147683	7.01169	2.66898e-12	1.72979e-11	17.151
EVI2B	-0.139435	0.0612758	-7.01023	2.69666e-12	1.74595e-11	17.1409
GNAZ	0.0984285	-0.513534	7.0069	2.76107e-12	1.78583e-11	17.1179
TLR5	-0.104211	0.143774	-7.00672	2.76445e-12	1.7862e-11	17.1167
RAB32	0.0969954	0.273268	7.00548	2.78888e-12	1.80015e-11	17.1081
HPCAL1	0.103193	0.462897	6.99668	2.96793e-12	1.91377e-11	17.0475
PRPF18	0.0782881	-0.312419	6.99359	3.03332e-12	1.95363e-11	17.0262
THBS4	-0.246775	0.332515	-6.99347	3.0359e-12	1.95363e-11	17.0254
TAF15	-0.103789	0.938452	-6.99325	3.04062e-12	1.95469e-11	17.0239
EMD	0.0855147	0.661056	6.98932	3.12608e-12	2.00759e-11	16.9968
SELENBP1	-0.169674	0.817754	-6.9863	3.19343e-12	2.04877e-11	16.9761
ACAA2	0.0994034	-0.0598872	6.97724	3.40424e-12	2.18181e-11	16.9137
NCBP2	0.0855268	0.325904	6.97697	3.41068e-12	2.18373e-11	16.9119
PTK2B	-0.0789782	-0.217408	-6.96923	3.60162e-12	2.30366e-11	16.8588
FEN1	0.114406	0.414093	6.96652	3.67104e-12	2.3457e-11	16.8401
BMPR2	-0.122072	0.3152	-6.96427	3.72957e-12	2.38069e-11	16.8247
CDKN2D	0.0924971	-0.35722	6.96247	3.77703e-12	2.40857e-11	16.8124
CXCL12	-0.167482	0.757672	-6.96036	3.83372e-12	2.44227e-11	16.7979
LGMN	0.113728	0.603547	6.95878	3.87637e-12	2.46696e-11	16.7871
DAG1	-0.0916234	0.994396	-6.95747	3.91238e-12	2.48738e-11	16.7781
HCLS1	-0.130334	0.486365	-6.95522	3.97464e-12	2.52443e-11	16.7627
SELP	-0.0904713	-0.412152	-6.95292	4.03937e-12	2.56298e-11	16.7469
CASP2	0.0877117	-0.225238	6.9524	4.05423e-12	2.56984e-11	16.7433
BTAF1	-0.0912013	0.305601	-6.94894	4.1539e-12	2.63039e-11	16.7197
TRADD	0.0760448	-0.11168	6.94676	4.21783e-12	2.66821e-11	16.7048
KIAA1598	-0.125198	0.632592	-6.93751	4.50046e-12	2.84417e-11	16.6415
CD40LG	-0.0973002	-0.663446	-6.93639	4.53594e-12	2.86374e-11	16.6339
SDC2	0.164473	0.0133748	6.93348	4.62939e-12	2.91983e-11	16.614
LGALS1	0.140567	1.91628	6.9322	4.67097e-12	2.94313e-11	16.6053
REL	-0.077141	-0.454174	-6.92718	4.83803e-12	3.04537e-11	16.571
FBXO7	0.0716486	0.175459	6.92301	4.98156e-12	3.13261e-11	16.5425
PTH	0.112806	-0.826388	6.92256	4.99704e-12	3.13923e-11	16.5395
CD24	0.300119	2.09879	6.91689	5.19906e-12	3.26291e-11	16.5009
CADPS2	-0.146226	0.164933	-6.91585	5.23719e-12	3.2836e-11	16.4937
PPP2R1B	0.0774415	-0.196066	6.91335	5.32943e-12	3.33813e-11	16.4767
ABCD3	-0.138863	0.276717	-6.9066	5.58666e-12	3.4958e-11	16.4308
NCK2	0.0836795	0.386478	6.90608	5.60711e-12	3.50513e-11	16.4272
PDHB	-0.0839197	0.907418	-6.90436	5.67478e-12	3.54394e-11	16.4155
RPS7	0.121844	1.23717	6.89901	5.8902e-12	3.67486e-11	16.3792
RHBDF1	-0.107868	0.686934	-6.89668	5.98662e-12	3.73135e-11	16.3634
TBL2	0.0633663	0.0512078	6.89644	5.99679e-12	3.73402e-11	16.3617
DMXL1	-0.108725	-0.331502	-6.89608	6.01193e-12	3.73978e-11	16.3593
HSD17B2	0.191648	-0.57971	6.89549	6.03674e-12	3.75153e-11	16.3553
NMU	0.19631	-0.649277	6.89406	6.09718e-12	3.78538e-11	16.3455
CD19	-0.143204	-0.444391	-6.88688	6.40981e-12	3.97559e-11	16.2968
CDC42BPB	-0.105347	0.346093	-6.88543	6.47493e-12	4.01205e-11	16.287
CXCL1	0.146543	-0.642905	6.88358	6.55873e-12	4.06001e-11	16.2744
DTX3	-0.0783001	-0.192575	-6.88219	6.62244e-12	4.09545e-11	16.265
PRAME	0.289924	-0.612647	6.88163	6.64825e-12	4.10741e-11	16.2612
SERPINB8	0.0633101	-0.387338	6.88054	6.69866e-12	4.13453e-11	16.2538
NDUFB6	0.0878412	0.546433	6.86844	7.28623e-12	4.49282e-11	16.1719
SMARCD1	-0.0732603	0.499792	-6.86753	7.33256e-12	4.517e-11	16.1657
E2F4	0.0613208	0.135125	6.86156	7.64261e-12	4.70343e-11	16.1254
TNFSF10	-0.20028	0.954839	-6.85966	7.74419e-12	4.76133e-11	16.1125
GCHFR	0.104849	0.0852759	6.85943	7.75632e-12	4.76417e-11	16.111
LTBP1	0.137959	-0.30765	6.8576	7.85536e-12	4.82033e-11	16.0986
ABCD1	0.0832617	-0.160303	6.85719	7.87774e-12	4.82939e-11	16.0958
SRPRB	0.0856032	0.863929	6.852	8.16603e-12	4.99873e-11	16.0608
LY6E	0.202839	1.28458	6.85194	8.16972e-12	4.99873e-11	16.0604
ETF1	0.0768765	0.161161	6.84898	8.33879e-12	5.09727e-11	16.0404
MT1H	0.121206	-0.157318	6.84783	8.40557e-12	5.13314e-11	16.0326
CX3CR1	-0.189443	0.0402936	-6.84595	8.51534e-12	5.19517e-11	16.02
ABHD5	0.075935	-0.169721	6.84017	8.86281e-12	5.40197e-11	15.981
PCSK6	-0.1688	-0.356333	-6.83194	9.38155e-12	5.71266e-11	15.9256
CSPG4	0.120441	-0.314387	6.8318	9.39074e-12	5.71278e-11	15.9247
SMAD5	-0.094538	0.410157	-6.8315	9.41015e-12	5.7191e-11	15.9226
KLHDC4	0.0914514	-0.0441223	6.83092	9.44784e-12	5.73651e-11	15.9187
NPR1	0.0952857	-0.58058	6.83065	9.46588e-12	5.74197e-11	15.9169
TBC1D8	-0.114194	0.120091	-6.82917	9.56315e-12	5.79151e-11	15.9069
SSBP1	0.079434	0.98458	6.82913	9.56581e-12	5.79151e-11	15.9067
DDX24	-0.0716202	0.846382	-6.8231	9.97232e-12	6.03188e-11	15.8661
HRK	0.112867	-0.76886	6.82136	1.00924e-11	6.09868e-11	15.8544
MAML1	-0.0635495	0.0737428	-6.81892	1.02636e-11	6.19624e-11	15.8381
NFX1	-0.0720831	0.0327406	-6.81707	1.03955e-11	6.26994e-11	15.8256
SH3GL1	0.0756914	0.128918	6.81596	1.04757e-11	6.31225e-11	15.8181
CPD	-0.141689	0.712524	-6.8155	1.05086e-11	6.32611e-11	15.8151
CR2	-0.15169	-0.598053	-6.81474	1.05637e-11	6.35322e-11	15.81
GAMT	-0.165844	0.257919	-6.81103	1.08372e-11	6.51156e-11	15.7851
CHODL	0.114985	-0.46372	6.8104	1.08848e-11	6.53398e-11	15.7808
EP300	-0.0880278	0.369609	-6.80811	1.10576e-11	6.63139e-11	15.7655
DCTN4	-0.0960792	0.246176	-6.7973	1.19111e-11	7.13655e-11	15.693
FBXL5	-0.0943284	0.620692	-6.79178	1.23717e-11	7.40551e-11	15.6561
SUPV3L1	0.0759614	0.0664052	6.78562	1.29064e-11	7.71828e-11	15.6149
JRKL	0.100266	-0.467185	6.78402	1.30486e-11	7.796e-11	15.6042
SDC1	0.201231	1.12097	6.78115	1.33081e-11	7.94352e-11	15.585
UBE2E3	0.152327	0.285546	6.77168	1.42007e-11	8.4684e-11	15.5218
DDIT4	0.173459	0.698789	6.76989	1.43763e-11	8.56503e-11	15.5098
IRS1	-0.169003	0.120229	-6.76912	1.44522e-11	8.60215e-11	15.5047
TRAF1	-0.0908331	-0.350808	-6.76395	1.4973e-11	8.90383e-11	15.4702
TNFRSF21	0.145659	0.293478	6.76303	1.50671e-11	8.95139e-11	15.4641
CCNT2	-0.0719547	-0.0684706	-6.76212	1.51613e-11	8.99892e-11	15.458
PLK2	-0.177512	0.0664103	-6.75851	1.55401e-11	9.21511e-11	15.434
FABP6	0.13718	-0.778704	6.75742	1.56569e-11	9.27197e-11	15.4267
NUMA1	-0.117702	0.863424	-6.75734	1.56652e-11	9.27197e-11	15.4262
BAP1	-0.0613809	0.214267	-6.75508	1.59087e-11	9.40731e-11	15.4112
PHF21A	-0.0684376	0.445973	-6.75329	1.61051e-11	9.51459e-11	15.3992
CSPG5	0.0573384	-0.663424	6.7476	1.67428e-11	9.88216e-11	15.3614
SDCBP	0.11687	0.803159	6.74711	1.6799e-11	9.90609e-11	15.3581
FMNL1	-0.104277	-0.444965	-6.74588	1.69408e-11	9.98042e-11	15.3499
MRPS15	0.088299	0.703983	6.72934	1.89635e-11	1.11617e-10	15.2401
SGK2	0.0595592	-0.552607	6.72404	1.96595e-11	1.15607e-10	15.205
HLA-DQB1	-0.197225	0.195622	-6.71908	2.03339e-11	1.19462e-10	15.1722
RFC3	0.0884824	-0.212432	6.71639	2.07105e-11	1.21562e-10	15.1543
MRPS30	-0.232589	0.775736	-6.70832	2.18763e-11	1.28286e-10	15.101
P2RY6	0.102719	-0.37532	6.69451	2.40257e-11	1.4076e-10	15.0097
ACTR3	0.102952	0.583049	6.68823	2.50702e-11	1.46744e-10	14.9683
FAM49B	0.101698	-0.078009	6.67909	2.66689e-11	1.55958e-10	14.9081
CACNA1B	0.0622143	-0.558182	6.67871	2.67372e-11	1.56213e-10	14.9056
FAM3C	0.096385	0.0414059	6.67664	2.71148e-11	1.58218e-10	14.892
IL10RA	-0.132226	-0.0690973	-6.67655	2.71302e-11	1.58218e-10	14.8914
ATXN1	-0.123694	0.0222806	-6.6753	2.73608e-11	1.59416e-10	14.8832
ARID3B	-0.0678008	-0.32497	-6.67328	2.77364e-11	1.61456e-10	14.8699
WNT5A	-0.171811	-0.195619	-6.67159	2.80552e-11	1.63162e-10	14.8588
SLC25A1	0.110686	0.383953	6.67126	2.81177e-11	1.63376e-10	14.8566
PARP11	-0.0847671	-0.452857	-6.66564	2.92065e-11	1.69547e-10	14.8196
KLRG1	-0.0755014	-0.322207	-6.6616	3.00123e-11	1.74066e-10	14.7932
FTSJ3	0.0934306	-0.0400767	6.66129	3.00755e-11	1.74273e-10	14.7911
RPS24	0.120562	1.46245	6.6603	3.02771e-11	1.75281e-10	14.7846
DDX49	0.0742957	-0.265339	6.65979	3.03807e-11	1.7572e-10	14.7813
LRRC41	0.068685	0.313715	6.65941	3.04604e-11	1.76013e-10	14.7787
GRM5	0.0799095	-0.727232	6.65928	3.04868e-11	1.76013e-10	14.7779
COX8A	0.0920469	1.439	6.6565	3.10623e-11	1.79173e-10	14.7597
TH	0.109016	-0.683318	6.65569	3.12323e-11	1.7999e-10	14.7544
EGFL6	0.148881	-0.320565	6.64557	3.34359e-11	1.92514e-10	14.688
PBK	0.150594	-0.286913	6.64366	3.38687e-11	1.9483e-10	14.6755
NT5E	0.0829565	-0.270322	6.64291	3.40395e-11	1.95634e-10	14.6706
TSEN34	0.0835506	0.741927	6.64	3.47126e-11	1.99226e-10	14.6515
CD163	0.161974	0.272496	6.63994	3.47272e-11	1.99226e-10	14.6511
BFSP1	0.105628	-0.626371	6.6379	3.52062e-11	2.01792e-10	14.6378
GLI2	-0.0716468	-0.499399	-6.62891	3.73972e-11	2.14157e-10	14.579
ABCA7	-0.0772583	-0.217199	-6.62513	3.83607e-11	2.19476e-10	14.5543
WFDC2	-0.242893	-0.180107	-6.62304	3.89005e-11	2.22364e-10	14.5407
SSH3	-0.116267	0.478948	-6.62042	3.9592e-11	2.26113e-10	14.5235
BCL9	-0.0788753	0.28242	-6.6195	3.98366e-11	2.27305e-10	14.5176
ALDH3A2	-0.138293	0.658596	-6.61689	4.05378e-11	2.31098e-10	14.5006
H2AFV	0.0779318	0.149671	6.61482	4.11058e-11	2.34126e-10	14.487
TSC2	-0.0911281	0.0699522	-6.59929	4.5608e-11	2.59536e-10	14.3859
MARCO	0.15822	-0.66368	6.59288	4.76039e-11	2.70651e-10	14.3442
KLHDC2	-0.107313	0.546564	-6.59211	4.78489e-11	2.718e-10	14.3392
SRRM1	-0.0816413	0.78794	-6.5873	4.94112e-11	2.80424e-10	14.308
RARA	-0.147023	0.779226	-6.58647	4.96851e-11	2.81727e-10	14.3026
CDC25B	0.140724	0.390078	6.58436	5.03892e-11	2.85464e-10	14.2889
WDR60	-0.096582	0.0352651	-6.58292	5.08762e-11	2.87965e-10	14.2796
BACH2	-0.0742258	-0.478745	-6.57547	5.3466e-11	3.02354e-10	14.2312
APOB	0.0818485	-0.622933	6.5692	5.57472e-11	3.14974e-10	14.1906
POLQ	0.0862966	-0.301157	6.56408	5.76786e-11	3.25597e-10	14.1575
GK2	0.0708413	-0.289622	6.56275	5.81941e-11	3.28215e-10	14.1488
COL9A1	0.0796771	-0.68553	6.56251	5.82867e-11	3.28445e-10	14.1473
SS18L2	-0.0704618	0.78888	-6.56167	5.86128e-11	3.2999e-10	14.1418
CDK5RAP3	-0.11517	0.835634	-6.56035	5.91288e-11	3.32599e-10	14.1333
ANKFY1	-0.0724211	0.233163	-6.5598	5.93455e-11	3.33523e-10	14.1298
CHD9	-0.0912377	0.428306	-6.55874	5.97653e-11	3.35585e-10	14.1229
PLP2	0.100821	0.318481	6.55799	6.0062e-11	3.36953e-10	14.1181
TPD52L2	0.0856401	0.96722	6.55591	6.09019e-11	3.41362e-10	14.1046
IRF2	-0.0618943	-0.174672	-6.54872	6.38776e-11	3.57726e-10	14.0582
NMD3	0.104024	0.010959	6.54678	6.47052e-11	3.62041e-10	14.0456
EDEM1	-0.0850929	0.147551	-6.54117	6.7158e-11	3.75434e-10	14.0095
IQGAP1	-0.101614	0.923684	-6.53915	6.80634e-11	3.8016e-10	13.9964
TAF13	0.119498	-0.505052	6.53537	6.97897e-11	3.8946e-10	13.9721
GZMA	-0.150288	-0.137338	-6.52942	7.25969e-11	4.04769e-10	13.9337
TMSB10	0.134288	2.61354	6.52736	7.35913e-11	4.09953e-10	13.9205
TTLL7	0.0953137	-0.475236	6.52152	7.64891e-11	4.25722e-10	13.8829
CLIC4	0.124833	0.850605	6.51405	8.03646e-11	4.469e-10	13.8349
LCK	-0.123963	-0.472886	-6.50947	8.28317e-11	4.60216e-10	13.8055
DBI	0.128692	0.732152	6.50297	8.64573e-11	4.7994e-10	13.7638
ITGA8	-0.0723157	-0.506651	-6.49847	8.90612e-11	4.93963e-10	13.735
IRF1	-0.111006	0.585749	-6.49482	9.12302e-11	5.05551e-10	13.7116
B4GALT5	0.100618	0.594019	6.49425	9.15699e-11	5.0699e-10	13.7079
LUC7L	-0.0964908	0.200237	-6.49307	9.22896e-11	5.1053e-10	13.7003
CD48	-0.144055	-0.0356695	-6.49143	9.32899e-11	5.15244e-10	13.6898
GIMAP4	-0.127824	0.440346	-6.4914	9.33042e-11	5.15244e-10	13.6897
TEX10	0.0688975	0.00131688	6.49114	9.34646e-11	5.15681e-10	13.688
MAPK11	0.0505909	-0.709538	6.49074	9.37115e-11	5.16594e-10	13.6855
SNX7	0.121572	-0.148571	6.47153	1.06325e-10	5.85616e-10	13.5627
BCS1L	0.055033	0.113085	6.46235	1.12928e-10	6.21449e-10	13.5041
SEC63	0.0913273	0.0850168	6.46046	1.14333e-10	6.28636e-10	13.4921
SLC1A4	-0.142267	0.245618	-6.45986	1.14781e-10	6.30553e-10	13.4883
DFFA	0.0674658	0.0897917	6.45724	1.16771e-10	6.40927e-10	13.4716
TRPM4	-0.148552	0.269014	-6.45407	1.19217e-10	6.53789e-10	13.4514
POMT2	-0.0801497	-0.130764	-6.45349	1.19672e-10	6.55716e-10	13.4477
SCGB1D2	-0.520405	0.19846	-6.45318	1.19921e-10	6.56515e-10	13.4457
CAPN3	-0.0745914	-0.316578	-6.45304	1.2003e-10	6.56546e-10	13.4448
SLC6A8	0.127933	-0.0837832	6.45231	1.20604e-10	6.59113e-10	13.4402
ZNF423	-0.104438	-0.246908	-6.44502	1.26494e-10	6.90709e-10	13.3938
PPP1R13B	-0.0794266	0.266226	-6.44449	1.26933e-10	6.92511e-10	13.3905
GALK1	0.0880548	0.220111	6.44269	1.2844e-10	7.00129e-10	13.379
PMM2	0.0850498	0.198511	6.43957	1.31085e-10	7.13935e-10	13.3592
DAP	0.0942676	0.762905	6.43503	1.35028e-10	7.34779e-10	13.3304
LMO1	0.0721917	-0.626692	6.43134	1.3832e-10	7.52048e-10	13.307
CPA4	0.0925398	-0.435496	6.43082	1.38786e-10	7.53843e-10	13.3037
EEF2	-0.114342	2.70543	-6.43071	1.38888e-10	7.53843e-10	13.303
TMEM40	0.0944766	-0.556903	6.42724	1.42072e-10	7.70469e-10	13.281
GPR19	0.107263	-0.546862	6.42699	1.42302e-10	7.71058e-10	13.2794
PAK2	-0.0811899	0.377555	-6.42268	1.46355e-10	7.92341e-10	13.2521
MAN1C1	-0.0981928	-0.0480165	-6.41919	1.49719e-10	8.0986e-10	13.23
FOXE3	0.0593589	-0.724724	6.41859	1.5031e-10	8.12364e-10	13.2262
ATP6V1F	0.0755103	1.16955	6.41758	1.51299e-10	8.17015e-10	13.2198
KLRB1	-0.134859	-0.267543	-6.41684	1.52034e-10	8.20284e-10	13.2151
RNF8	0.0613392	-0.201308	6.40723	1.61843e-10	8.72468e-10	13.1543
RASA2	-0.0828857	-0.32519	-6.40558	1.63589e-10	8.81131e-10	13.1439
IVL	0.0784237	-0.60027	6.4037	1.65603e-10	8.91223e-10	13.132
GABRA6	0.0943945	-0.752564	6.39846	1.71333e-10	9.21278e-10	13.099
ZNF7	0.0886162	0.0848268	6.39689	1.73088e-10	9.29182e-10	13.0891
GOT1	0.09553	0.433119	6.39688	1.73096e-10	9.29182e-10	13.089
MAPK6	0.0886902	0.354306	6.39215	1.78503e-10	9.57398e-10	13.0591
PDE8A	0.0612306	-0.156967	6.39078	1.80088e-10	9.65081e-10	13.0505
SIRT2	0.0586033	-0.126155	6.38555	1.86301e-10	9.97535e-10	13.0176
ZNF654	-0.0761463	-0.316296	-6.38403	1.88147e-10	1.00657e-09	13.008
NUSAP1	0.151448	0.281232	6.38111	1.91747e-10	1.02496e-09	12.9896
TOMM22	0.0953377	0.414783	6.38097	1.91912e-10	1.02498e-09	12.9888
TOMM70A	0.0758419	0.871913	6.37761	1.96134e-10	1.04665e-09	12.9676
CDC6	0.156141	-0.525779	6.37582	1.98423e-10	1.05798e-09	12.9563
ATP6V1H	0.100579	0.511985	6.37269	2.02489e-10	1.07875e-09	12.9366
CXXC1	-0.0682077	0.445869	-6.37228	2.03016e-10	1.08065e-09	12.9341
BAIAP2L2	0.103651	-0.566946	6.37211	2.03244e-10	1.08096e-09	12.933
RABGAP1	-0.0710677	0.797737	-6.3715	2.04051e-10	1.08434e-09	12.9292
XRCC1	-0.067838	0.01267	-6.37062	2.05218e-10	1.08963e-09	12.9236
MAFK	0.0953211	-0.569455	6.37042	2.05482e-10	1.09012e-09	12.9224
CNGA1	0.103786	-0.600622	6.36758	2.09293e-10	1.10941e-09	12.9045
SMYD2	0.102478	0.133073	6.36393	2.1429e-10	1.13495e-09	12.8816
DSCR3	0.0808846	0.223034	6.36365	2.14674e-10	1.13604e-09	12.8799
ABCC8	-0.12067	-0.463551	-6.36331	2.15143e-10	1.13757e-09	12.8777
BRD4	-0.0719259	0.0383727	-6.36133	2.17909e-10	1.15123e-09	12.8653
CCL5	-0.204109	0.599317	-6.35927	2.20837e-10	1.16573e-09	12.8524
SELPLG	-0.0802494	-0.3675	-6.35856	2.2185e-10	1.17011e-09	12.8479
TAF2	0.0907161	0.166174	6.35798	2.22682e-10	1.17352e-09	12.8443
FLNA	0.146278	0.75286	6.35616	2.25315e-10	1.18641e-09	12.8329
HR	0.0733261	-0.609723	6.35435	2.27961e-10	1.19935e-09	12.8215
FAM20B	-0.0876464	0.665145	-6.35093	2.33039e-10	1.22505e-09	12.8001
HAPLN1	0.135515	-0.723447	6.34965	2.34966e-10	1.23416e-09	12.7921
TAL1	0.0502128	-0.530853	6.34907	2.35854e-10	1.2378e-09	12.7885
BCL10	0.0657161	-0.165529	6.34683	2.39278e-10	1.25473e-09	12.7745
ENPP4	-0.12243	-0.0998115	-6.34362	2.4429e-10	1.27995e-09	12.7543
CLTA	0.0637354	0.805219	6.34185	2.47083e-10	1.29352e-09	12.7433
SEPHS1	0.0901869	0.4528	6.33938	2.5105e-10	1.3132e-09	12.7278
WT1	0.184133	-0.668602	6.33653	2.55701e-10	1.33643e-09	12.71
FSHB	0.0781886	-0.616555	6.33628	2.56104e-10	1.33743e-09	12.7084
PPIG	-0.105186	0.29028	-6.32793	2.70236e-10	1.41007e-09	12.6563
PRKD2	-0.0688024	0.03148	-6.32586	2.7385e-10	1.42775e-09	12.6434
IFI35	-0.112783	0.440159	-6.32408	2.77014e-10	1.44306e-09	12.6322
SLC6A4	-0.143537	-0.431394	-6.31787	2.88265e-10	1.50045e-09	12.5935
PFDN4	0.0740623	-0.413797	6.31245	2.98467e-10	1.55227e-09	12.5598
SIRT1	-0.0733704	0.012239	-6.3117	2.99915e-10	1.55853e-09	12.5551
DIABLO	0.0629388	0.169174	6.30324	3.16618e-10	1.6427e-09	12.5024
CST7	-0.115792	-0.210367	-6.30323	3.1663e-10	1.6427e-09	12.5024
CSNK1G1	-0.0920959	-0.0315169	-6.30211	3.18926e-10	1.65326e-09	12.4954
AGGF1	-0.0624262	0.117398	-6.30155	3.20069e-10	1.65783e-09	12.4919
COL4A3BP	-0.103501	0.325924	-6.29288	3.38327e-10	1.75096e-09	12.4381
CRNKL1	-0.102614	0.0245086	-6.2921	3.40005e-10	1.75821e-09	12.4332
ELK1	0.059563	0.276015	6.29105	3.42309e-10	1.76869e-09	12.4267
KIAA0020	0.0970495	0.350089	6.2836	3.58982e-10	1.85333e-09	12.3805
PSMD3	0.190278	0.192568	6.27655	3.75502e-10	1.93704e-09	12.3368
PODXL2	0.132789	-0.0334501	6.27447	3.8051e-10	1.96128e-09	12.324
ABCA8	-0.177741	-0.272326	-6.26682	3.99519e-10	2.05759e-09	12.2766
PSMD13	0.0711183	0.106702	6.26516	4.03782e-10	2.07786e-09	12.2663
NF2	0.072982	-0.512099	6.26149	4.13328e-10	2.12526e-09	12.2437
GMIP	-0.086182	-0.107764	-6.26046	4.16032e-10	2.13743e-09	12.2373
ECT2	0.137274	0.167921	6.25964	4.18215e-10	2.1469e-09	12.2322
ALAS2	0.0442319	-0.751513	6.25703	4.25214e-10	2.18107e-09	12.2161
GPKOW	0.0565918	-0.0604954	6.25119	4.41281e-10	2.26165e-09	12.1801
GPR107	0.0682157	-0.0354261	6.24922	4.46847e-10	2.28834e-09	12.168
AXL	-0.0944393	0.28131	-6.24597	4.56163e-10	2.33287e-09	12.1479
ZNF189	-0.0637946	0.125977	-6.24593	4.56289e-10	2.33287e-09	12.1477
ZNF43	-0.0903843	-0.361445	-6.24581	4.56648e-10	2.33287e-09	12.1469
EN2	0.0779358	-0.662558	6.24322	4.64207e-10	2.36958e-09	12.131
IRF8	-0.116805	0.243639	-6.23695	4.83033e-10	2.4637e-09	12.0924
PAX7	0.0723296	-0.674937	6.23398	4.92212e-10	2.5085e-09	12.0741
RIMS2	0.0848051	-0.505198	6.23311	4.94954e-10	2.52045e-09	12.0687
KIF11	0.117504	-0.176231	6.22829	5.10291e-10	2.59647e-09	12.0391
QDPR	-0.187645	0.724917	-6.21953	5.39354e-10	2.74215e-09	11.9853
SH3TC1	-0.0647436	-0.243589	-6.21924	5.40359e-10	2.74506e-09	11.9835
OSBPL8	-0.125757	0.23346	-6.21564	5.52786e-10	2.80594e-09	11.9615
PLS3	0.128004	0.573227	6.21323	5.61297e-10	2.84687e-09	11.9466
UNG	0.0884173	0.337647	6.21214	5.65172e-10	2.86423e-09	11.94
ARHGAP11A	0.091847	-0.519304	6.20981	5.73533e-10	2.90428e-09	11.9257
LRRC40	0.0668763	-0.309433	6.20955	5.74474e-10	2.90673e-09	11.9241
EGFR	0.139897	-0.165881	6.20933	5.75268e-10	2.90843e-09	11.9228
PRF1	-0.0956464	-0.341314	-6.20866	5.77721e-10	2.9185e-09	11.9187
MMP13	0.198705	-0.402446	6.20731	5.82675e-10	2.94119e-09	11.9104
HS3ST2	0.077628	-0.43864	6.2069	5.84161e-10	2.94635e-09	11.9079
BNIP3L	-0.109415	0.627429	-6.20255	6.00412e-10	3.02511e-09	11.8813
CACNA2D2	-0.129766	-0.184175	-6.20247	6.00731e-10	3.02511e-09	11.8808
CSF3	0.0567032	-0.74794	6.20086	6.06856e-10	3.05353e-09	11.8709
FCGRT	-0.122564	0.850895	-6.19884	6.14648e-10	3.09028e-09	11.8585
PGPEP1	-0.0676159	-0.372631	-6.19847	6.16085e-10	3.09506e-09	11.8563
APLP1	0.133038	-0.526543	6.196	6.25729e-10	3.14102e-09	11.8412
MYO6	-0.142454	0.688862	-6.19421	6.32824e-10	3.17413e-09	11.8303
VAX2	0.0791301	-0.493886	6.19108	6.45419e-10	3.23474e-09	11.8111
DGUOK	0.0605356	0.0510649	6.19061	6.47334e-10	3.24178e-09	11.8083
TINF2	-0.0662366	0.544181	-6.18968	6.5114e-10	3.25827e-09	11.8026
KCNIP2	0.0747991	-0.623668	6.18773	6.59202e-10	3.29601e-09	11.7906
SPRR1A	0.0755036	-0.709195	6.18262	6.80735e-10	3.401e-09	11.7594
E2F2	0.108425	-0.312508	6.18246	6.81418e-10	3.40173e-09	11.7585
FNTA	0.0964895	0.352332	6.18195	6.83595e-10	3.40991e-09	11.7554
RBMS3	-0.075962	-0.276202	-6.17979	6.92962e-10	3.45392e-09	11.7422
ELOVL5	-0.180482	1.07058	-6.17949	6.94264e-10	3.45769e-09	11.7404
ANXA11	-0.0839285	0.722374	-6.17692	7.05577e-10	3.51128e-09	11.7247
MTMR2	0.075088	-0.340365	6.17544	7.12134e-10	3.54114e-09	11.7157
LCP2	-0.10701	-0.377183	-6.17393	7.18944e-10	3.5722e-09	11.7065
DAB2	-0.102164	0.752559	-6.17061	7.34085e-10	3.64458e-09	11.6862
DNASE1	0.0578647	-0.56336	6.16985	7.37608e-10	3.6592e-09	11.6816
SNRPF	0.0846853	0.767332	6.16845	7.4411e-10	3.68858e-09	11.6731
CCR9	0.0510687	-0.590217	6.16183	7.75653e-10	3.84193e-09	11.6328
GATAD1	-0.0793225	-0.0180266	-6.15937	7.87704e-10	3.89858e-09	11.6179
MPDZ	-0.0960954	0.100315	-6.15712	7.98878e-10	3.9508e-09	11.6042
ARSD	-0.101354	0.66796	-6.15405	8.14402e-10	4.02444e-09	11.5855
B4GALT4	0.0644742	-0.00894516	6.15342	8.17584e-10	4.03702e-09	11.5817
ABL1	-0.0695487	0.544386	-6.15266	8.2152e-10	4.0533e-09	11.5771
BRD8	-0.0744877	0.253992	-6.15125	8.28805e-10	4.08607e-09	11.5685
CNOT4	-0.055483	0.330516	-6.14824	8.44561e-10	4.16051e-09	11.5503
BDKRB1	0.0683892	-0.541749	6.14766	8.47596e-10	4.17222e-09	11.5468
POLR2H	0.0765123	0.785194	6.14435	8.6535e-10	4.25632e-09	11.5267
GPR37	0.109256	-0.29285	6.14278	8.73902e-10	4.29505e-09	11.5171
NXT1	0.0653057	0.431907	6.14157	8.80529e-10	4.32427e-09	11.5098
NEDD9	-0.119085	-0.0567659	-6.14029	8.87598e-10	4.35562e-09	11.502
PTPRH	0.0563407	-0.59339	6.13894	8.95099e-10	4.38903e-09	11.4939
MSRB2	0.0803985	0.873024	6.13666	9.07919e-10	4.44845e-09	11.4801
KCNK5	0.12161	-0.479376	6.1352	9.16262e-10	4.48587e-09	11.4712
AASS	-0.0848194	-0.570236	-6.13297	9.29069e-10	4.54506e-09	11.4578
EIF5A	0.105256	1.18855	6.1311	9.39999e-10	4.59499e-09	11.4464
TSSC1	0.0579058	0.19593	6.12725	9.62854e-10	4.70309e-09	11.4231
GBE1	0.0903734	0.0173357	6.12403	9.82353e-10	4.79464e-09	11.4037
STK4	-0.0768325	0.467253	-6.1217	9.96731e-10	4.86108e-09	11.3896
SLC24A1	-0.0776983	-0.268834	-6.11562	1.0352e-09	5.04481e-09	11.3529
YWHAE	-0.111362	0.881052	-6.1122	1.05748e-09	5.14942e-09	11.3322
MYO9A	-0.0752276	0.126349	-6.10992	1.07258e-09	5.21895e-09	11.3185
SH3GLB1	0.0760889	0.703026	6.10283	1.12093e-09	5.45002e-09	11.2757
IL1RL2	0.0801967	-0.703817	6.10086	1.13468e-09	5.51265e-09	11.2639
CHSY1	-0.0998465	0.712115	-6.09834	1.15257e-09	5.5953e-09	11.2487
DSC2	0.163432	-0.202864	6.09733	1.15983e-09	5.62623e-09	11.2426
NDST2	-0.0497718	0.0127826	-6.09575	1.17125e-09	5.67731e-09	11.2331
BMPR1B	-0.263419	0.108681	-6.09495	1.17711e-09	5.70137e-09	11.2283
POU2F2	-0.063622	-0.54942	-6.09377	1.18576e-09	5.73888e-09	11.2212
FBXL2	-0.0887379	-0.0803532	-6.09207	1.19829e-09	5.7951e-09	11.211
CSF1R	-0.10332	0.73003	-6.08953	1.21738e-09	5.88292e-09	11.1957
PTPRB	-0.0829807	-0.294481	-6.08917	1.22006e-09	5.89138e-09	11.1935
TNFSF14	-0.0835399	-0.658777	-6.0887	1.22365e-09	5.90424e-09	11.1907
GABARAPL2	0.0785566	0.823423	6.08804	1.22863e-09	5.92375e-09	11.1868
ELN	-0.163092	0.0244555	-6.08637	1.24145e-09	5.98103e-09	11.1767
H1FX	-0.0981642	0.555443	-6.08072	1.28566e-09	6.18931e-09	11.1428
HMGCS2	-0.309741	-0.0941945	-6.07945	1.29582e-09	6.23347e-09	11.1351
RBPMS	-0.108765	0.10825	-6.07846	1.30378e-09	6.26703e-09	11.1292
NEK2	0.138859	-0.131059	6.0779	1.30824e-09	6.28372e-09	11.1259
CREB1	-0.0806224	0.281529	-6.07671	1.31793e-09	6.32545e-09	11.1187
PTPRA	-0.0728399	0.632457	-6.07127	1.36305e-09	6.53707e-09	11.0861
COL6A3	-0.185304	1.95083	-6.0706	1.36872e-09	6.55929e-09	11.0821
MAGEB3	0.0911608	-0.722866	6.06866	1.38524e-09	6.63345e-09	11.0705
RCBTB1	-0.0880288	-0.249808	-6.06793	1.39145e-09	6.65818e-09	11.0661
IDH2	0.138952	0.844747	6.06005	1.46081e-09	6.98483e-09	11.019
USP2	0.0624577	-0.567897	6.0567	1.49138e-09	7.1256e-09	10.9989
PRDX6	0.084696	1.46604	6.05343	1.52173e-09	7.26471e-09	10.9794
HS6ST1	0.0796226	-0.279973	6.05332	1.52278e-09	7.26471e-09	10.9787
RASGRP2	-0.0923004	-0.578728	-6.05179	1.53721e-09	7.32801e-09	10.9696
MXRA5	-0.172845	1.57511	-6.05118	1.54304e-09	7.3503e-09	10.9659
LBP	0.170927	-0.367574	6.04821	1.57147e-09	7.48009e-09	10.9482
MECP2	-0.0691719	-0.0336817	-6.04619	1.59116e-09	7.56813e-09	10.9361
CAPN1	0.0875546	0.792021	6.04584	1.59464e-09	7.57901e-09	10.934
TNFSF9	0.0484985	-0.527119	6.0397	1.65604e-09	7.86493e-09	10.8974
FAM50A	0.0741127	0.934733	6.03601	1.69405e-09	8.03944e-09	10.8754
NPM3	0.0867344	0.180397	6.03309	1.72473e-09	8.17893e-09	10.858
GSTM4	-0.0947666	-0.352536	-6.03086	1.74854e-09	8.28565e-09	10.8447
TIMELESS	0.0825832	0.176009	6.02719	1.78832e-09	8.46783e-09	10.8229
PRCP	-0.0975436	0.74895	-6.02561	1.80577e-09	8.54407e-09	10.8135
RAMP3	-0.121064	0.0050768	-6.02471	1.81581e-09	8.58517e-09	10.8081
CDC7	0.095899	-0.305838	6.024	1.8237e-09	8.61607e-09	10.8039
PTPLA	0.146386	-0.337504	6.02139	1.8532e-09	8.74891e-09	10.7884
RPL7	0.111433	1.35235	6.02078	1.86012e-09	8.77506e-09	10.7848
CD74	-0.165171	1.56635	-6.01848	1.88655e-09	8.89316e-09	10.7711
CACNA1F	-0.0572947	-0.668595	-6.01474	1.93028e-09	9.09251e-09	10.7489
COL16A1	-0.127209	0.587066	-6.01373	1.94233e-09	9.14247e-09	10.7429
ZNF446	-0.0784135	-0.0690551	-6.0088	2.00187e-09	9.41576e-09	10.7136
RASGRP3	-0.0918148	-0.176959	-6.00734	2.01978e-09	9.49294e-09	10.705
FGG	0.210416	-0.640271	6.00537	2.04431e-09	9.60114e-09	10.6933
HS3ST1	0.0674532	-0.585736	5.99932	2.12135e-09	9.95559e-09	10.6574
MAP2	0.0927866	-0.498313	5.99349	2.19825e-09	1.03089e-08	10.623
TEAD3	0.0638218	-0.282358	5.99187	2.22022e-09	1.04042e-08	10.6133
NDUFA4	0.0905598	1.51972	5.99118	2.2296e-09	1.04404e-08	10.6092
ECHDC3	0.111436	0.198587	5.99037	2.24063e-09	1.04844e-08	10.6045
CD3D	-0.151332	0.0813476	-5.98952	2.25222e-09	1.05309e-08	10.5995
YWHAZ	0.126773	2.15689	5.98174	2.36179e-09	1.1035e-08	10.5534
POU2F1	-0.0896292	-0.0972312	-5.98065	2.37754e-09	1.11005e-08	10.547
STXBP2	-0.0899007	0.37806	-5.9797	2.39128e-09	1.11564e-08	10.5414
TBXA2R	0.039676	-0.522647	5.97522	2.45738e-09	1.14563e-08	10.515
BATF	-0.11107	0.0585069	-5.97189	2.50783e-09	1.1683e-08	10.4953
GFER	0.0626808	-0.388771	5.97065	2.52686e-09	1.1763e-08	10.488
NRXN2	-0.079512	-0.394299	-5.96681	2.58645e-09	1.20315e-08	10.4654
BIRC3	-0.140244	-0.401952	-5.96619	2.5963e-09	1.20685e-08	10.4617
SLC28A1	0.0542369	-0.542868	5.96564	2.60494e-09	1.20983e-08	10.4585
TMLHE	0.0678784	-0.455532	5.96554	2.60653e-09	1.20983e-08	10.4579
PPEF1	0.0980599	-0.309928	5.96113	2.67742e-09	1.24183e-08	10.4319
MYO9B	-0.0612037	0.322021	-5.96019	2.69273e-09	1.24802e-08	10.4264
MAD2L1BP	0.0599667	-0.079528	5.95903	2.71181e-09	1.25594e-08	10.4196
RASAL1	0.0773125	-0.506577	5.95836	2.72284e-09	1.25931e-08	10.4157
EIF4E	0.0866975	0.0590468	5.95835	2.72304e-09	1.25931e-08	10.4156
PRIM1	0.0749417	-0.0740137	5.95649	2.75392e-09	1.27266e-08	10.4047
STAC	0.0784134	-0.494571	5.95583	2.76494e-09	1.27609e-08	10.4008
SLC25A4	0.0835063	0.42883	5.95581	2.76537e-09	1.27609e-08	10.4006
DUSP14	0.0822354	0.194324	5.95479	2.78258e-09	1.2831e-08	10.3946
FZD5	0.0609279	-0.702886	5.95464	2.78508e-09	1.28332e-08	10.3938
MAPK10	0.0802241	-0.282086	5.95188	2.83217e-09	1.30407e-08	10.3775
AGTR1	-0.260994	-0.189665	-5.94903	2.88153e-09	1.32584e-08	10.3608
TAOK2	-0.0661844	0.094015	-5.9484	2.89255e-09	1.32995e-08	10.3571
FPGS	0.0553572	-0.239687	5.94725	2.91275e-09	1.33826e-08	10.3504
DEAF1	-0.0887698	0.0898327	-5.94553	2.9433e-09	1.35132e-08	10.3403
VSIG4	0.113888	-0.197819	5.94424	2.96636e-09	1.36092e-08	10.3327
JAM2	-0.0865656	-0.13694	-5.9441	2.96901e-09	1.36115e-08	10.3318
BTG1	-0.109507	1.33988	-5.93959	3.05116e-09	1.39781e-08	10.3054
HSBP1	0.0929364	1.04338	5.93917	3.05889e-09	1.40034e-08	10.303
ZNF586	-0.0635806	0.0392474	-5.93599	3.11843e-09	1.42656e-08	10.2843
FBXO21	-0.0669123	0.684203	-5.93554	3.12686e-09	1.42939e-08	10.2817
RLN2	-0.132656	-0.4525	-5.93533	3.13099e-09	1.43025e-08	10.2804
MTRF1L	0.0574403	-0.37961	5.93385	3.15899e-09	1.442e-08	10.2718
DNAJA2	0.0830363	0.690167	5.93179	3.1986e-09	1.45829e-08	10.2597
MS4A4A	0.140422	-0.360688	5.93176	3.19927e-09	1.45829e-08	10.2595
FGD6	-0.0880279	-0.299204	-5.92756	3.28154e-09	1.49471e-08	10.2349
CCS	0.0710852	-0.0989697	5.92218	3.38995e-09	1.54299e-08	10.2034
LYPLA1	0.113797	0.236509	5.91914	3.45273e-09	1.57044e-08	10.1857
TXNDC9	0.0782752	0.0280826	5.91555	3.52833e-09	1.60367e-08	10.1647
SGSH	-0.0814087	0.321212	-5.91523	3.53525e-09	1.60567e-08	10.1628
PLA2G7	0.150791	-0.277073	5.91241	3.59596e-09	1.63207e-08	10.1463
ILVBL	0.0792642	0.400907	5.91147	3.61625e-09	1.64011e-08	10.1409
HIST1H3J	0.0815023	-0.68799	5.90748	3.70431e-09	1.67885e-08	10.1176
FZD2	-0.0907174	-0.0318458	-5.90065	3.85987e-09	1.7481e-08	10.0778
CALML5	0.296077	-0.0780535	5.89309	4.03954e-09	1.82816e-08	10.0337
CCL7	0.100827	-0.699985	5.88481	4.24548e-09	1.92e-08	9.9856
NGB	0.0687535	-0.636075	5.88088	4.34696e-09	1.96449e-08	9.96274
CALU	0.100641	0.87468	5.88011	4.36716e-09	1.97222e-08	9.95825
ACE2	0.122517	-0.707131	5.87864	4.4057e-09	1.98749e-08	9.94975
RPLP0	0.0944286	1.71322	5.87858	4.40725e-09	1.98749e-08	9.94941
TPD52L1	0.173832	0.401533	5.87273	4.56459e-09	2.05698e-08	9.91546
FLAD1	0.0807663	0.58673	5.86695	4.72548e-09	2.12797e-08	9.88194
PRPF38B	-0.0635628	-0.149985	-5.86612	4.74893e-09	2.13702e-08	9.87715
TBC1D13	-0.0724173	0.00110467	-5.86141	4.88475e-09	2.19658e-08	9.84986
PRNP	0.120934	0.393103	5.8601	4.92307e-09	2.21224e-08	9.8423
CHST2	0.0983804	-0.456391	5.85896	4.9568e-09	2.22583e-08	9.83569
NCOA4	-0.0774892	1.4851	-5.85765	4.99592e-09	2.2418e-08	9.82808
HMGA1	0.109488	0.556886	5.85381	5.11173e-09	2.29215e-08	9.80591
LANCL1	-0.0735088	0.469286	-5.84911	5.25727e-09	2.35575e-08	9.77874
PDGFRB	-0.11076	1.06174	-5.84673	5.33254e-09	2.38779e-08	9.76499
GTSE1	0.0820001	-0.396708	5.84297	5.45346e-09	2.44021e-08	9.74329
DBN1	0.100353	0.587766	5.8423	5.47531e-09	2.44826e-08	9.73942
MASP1	0.0493523	-0.653342	5.83644	5.66998e-09	2.53352e-08	9.70562
ATRN	-0.0652505	0.259374	-5.83369	5.7636e-09	2.57354e-08	9.68978
S100A5	0.0692954	-0.723774	5.83221	5.8148e-09	2.59458e-08	9.68122
SERPINA4	0.0560681	-0.564587	5.83139	5.84299e-09	2.60532e-08	9.67654
HDGF	0.0895404	1.28299	5.82907	5.92446e-09	2.6398e-08	9.66315
ZNF136	-0.0639346	-0.328277	-5.82329	6.13154e-09	2.73015e-08	9.62991
TUBG2	-0.0820178	0.0172692	-5.82103	6.21451e-09	2.76515e-08	9.61691
SDHC	0.0787914	0.612605	5.81731	6.35334e-09	2.82494e-08	9.59554
CAV2	0.110676	-0.0539871	5.81668	6.37739e-09	2.83365e-08	9.59188
GSTO1	0.0715313	0.863135	5.81403	6.47838e-09	2.87651e-08	9.57668
SURF2	0.0847837	-0.41195	5.81085	6.60192e-09	2.92931e-08	9.55841
KCNN4	0.142523	-0.327154	5.80883	6.68127e-09	2.96245e-08	9.54686
RFWD3	0.0744425	0.0595269	5.80825	6.70441e-09	2.97063e-08	9.54351
CCL21	-0.162773	-0.311744	-5.80479	6.84336e-09	3.03008e-08	9.52367
CLTCL1	0.0796338	-0.567467	5.8041	6.87146e-09	3.04041e-08	9.51971
SSFA2	-0.16971	0.183294	-5.80007	7.03756e-09	3.11173e-08	9.49661
MYRIP	-0.134141	-0.564215	-5.79984	7.04708e-09	3.11377e-08	9.4953
ANKMY1	-0.0759241	-0.0650654	-5.79907	7.07935e-09	3.12585e-08	9.49088
PRRX2	0.113172	-0.0639182	5.79759	7.14169e-09	3.15118e-08	9.4824
ATP5F1	0.0749946	0.713169	5.79484	7.25875e-09	3.20061e-08	9.46668
EN1	0.162501	-0.483207	5.79425	7.28437e-09	3.20952e-08	9.46327
IL22RA1	0.0471308	-0.561311	5.79414	7.28906e-09	3.20952e-08	9.46265
ZFPL1	0.0596901	-0.154885	5.79363	7.31105e-09	3.21696e-08	9.45973
AKAP13	-0.0718699	-0.00847859	-5.78648	7.6269e-09	3.35362e-08	9.41883
POP5	0.0655162	0.197938	5.78618	7.6404e-09	3.35723e-08	9.41712
DOK5	0.0724037	-0.490069	5.786	7.64862e-09	3.35851e-08	9.41608
PARVB	0.0723566	0.0886949	5.78138	7.85993e-09	3.44891e-08	9.38973
BAG5	-0.0713706	0.490417	-5.77792	8.0223e-09	3.51773e-08	9.36996
SPAG5	0.12667	-0.341454	5.77305	8.25628e-09	3.61783e-08	9.34216
CSF3R	-0.106206	-0.00304676	-5.77212	8.30154e-09	3.63515e-08	9.33687
SLC4A3	0.0872907	-0.548692	5.77159	8.32763e-09	3.64406e-08	9.33384
DST	-0.154956	0.0265151	-5.77013	8.39932e-09	3.67289e-08	9.32555
DFNA5	0.0772399	0.00212414	5.76955	8.42835e-09	3.68305e-08	9.32221
DTNA	0.0872235	-0.187107	5.76234	8.79379e-09	3.8401e-08	9.28118
ESRRG	-0.167505	-0.34866	-5.76173	8.82576e-09	3.85141e-08	9.27767
DLL3	0.0838566	-0.604166	5.75776	9.03398e-09	3.93956e-08	9.25512
NDUFB5	0.0674655	1.07021	5.75604	9.12597e-09	3.97694e-08	9.24533
RPL41	0.0548634	-0.0208813	5.75472	9.19738e-09	4.00531e-08	9.23779
HTR6	0.0580393	-0.513959	5.75305	9.28799e-09	4.042e-08	9.22831
ACVR1B	-0.0638306	0.46587	-5.75285	9.29917e-09	4.04409e-08	9.22715
CD7	-0.0907542	-0.391182	-5.75076	9.41397e-09	4.09121e-08	9.21529
DUSP22	0.0672564	-0.049293	5.74903	9.51017e-09	4.13019e-08	9.20546
ITIH4	-0.0556099	-0.641895	-5.747	9.62429e-09	4.17689e-08	9.19393
KIF5B	0.0795618	0.695032	5.7451	9.73231e-09	4.22047e-08	9.18314
ACTR3B	0.103454	-0.368981	5.745	9.73802e-09	4.22047e-08	9.18257
GUCA1A	0.0507575	-0.646072	5.74449	9.76706e-09	4.23017e-08	9.17969
ATP2B4	-0.0848052	0.569545	-5.74382	9.80572e-09	4.24402e-08	9.17588
CRISP2	0.118788	-0.632704	5.74091	9.97442e-09	4.31409e-08	9.15939
TXN2	0.0568931	-0.0562615	5.73911	1.00801e-08	4.35683e-08	9.1492
DOC2A	-0.0813272	-0.539791	-5.73725	1.01905e-08	4.40154e-08	9.13867
ARL2BP	0.0585637	0.262485	5.73663	1.02277e-08	4.4146e-08	9.13515
DIAPH3	0.0928116	-0.62924	5.7352	1.03137e-08	4.44872e-08	9.12705
CUL4A	-0.0778184	0.333598	-5.73216	1.04995e-08	4.52576e-08	9.1098
MR1	-0.068045	0.0227351	-5.72938	1.06719e-08	4.59698e-08	9.09405
PAFAH1B1	-0.0635337	0.553266	-5.72591	1.0891e-08	4.68817e-08	9.07441
PARD6A	0.0717632	-0.308938	5.72473	1.0966e-08	4.71723e-08	9.06778
DDX3X	-0.0670879	1.28373	-5.71975	1.12904e-08	4.85348e-08	9.03961
WASF1	0.0804539	-0.485207	5.71712	1.1465e-08	4.92521e-08	9.02477
PTP4A3	0.0870002	-0.11023	5.7149	1.1615e-08	4.98626e-08	9.01221
RIPK1	-0.0610638	0.259137	-5.71417	1.16645e-08	5.00413e-08	9.0081
TBC1D4	-0.0869334	-0.00857485	-5.71281	1.17578e-08	5.04077e-08	9.0004
PAICS	0.0911109	1.1134	5.71228	1.17942e-08	5.05296e-08	8.99741
ANPEP	-0.209935	0.056916	-5.70718	1.21502e-08	5.19871e-08	8.96868
RFC1	-0.0627889	0.299475	-5.70718	1.21508e-08	5.19871e-08	8.96863
LSM1	0.108716	0.849228	5.70346	1.24167e-08	5.3089e-08	8.94771
MTX2	0.0674065	0.45115	5.70254	1.24836e-08	5.33388e-08	8.94252
TXNL4B	0.0521527	-0.380549	5.7024	1.24937e-08	5.33461e-08	8.94174
RREB1	-0.0589603	0.0306571	-5.70146	1.25625e-08	5.36039e-08	8.93643
MAGEB2	0.0638054	-0.617907	5.70084	1.26078e-08	5.3761e-08	8.93295
HIRA	0.0930778	-0.423139	5.69959	1.27006e-08	5.41205e-08	8.92587
MCM2	0.106654	0.258337	5.69656	1.29263e-08	5.50453e-08	8.90885
RPN2	0.0941488	1.18322	5.69636	1.29414e-08	5.50727e-08	8.90772
TOMM34	0.0618893	0.463203	5.69563	1.29964e-08	5.52696e-08	8.90362
ITGB7	-0.0978867	-0.301576	-5.69535	1.30182e-08	5.53253e-08	8.902
GPR3	0.0755807	-0.625247	5.69348	1.31602e-08	5.58911e-08	8.89152
ADAMTS1	0.137815	-0.131343	5.69235	1.32474e-08	5.6224e-08	8.88514
IL1RAP	0.0732301	-0.553251	5.69195	1.32785e-08	5.63184e-08	8.88287
PLEKHA6	-0.125104	0.0116064	-5.69068	1.33766e-08	5.66964e-08	8.87576
GATA6	0.111467	-0.57367	5.68957	1.34633e-08	5.70258e-08	8.86952
SERPINB6	-0.0838309	1.21661	-5.68535	1.37978e-08	5.84038e-08	8.8458
GSTZ1	-0.108001	-0.0797367	-5.68324	1.3968e-08	5.90846e-08	8.83396
ACOX1	0.0654803	-0.149891	5.6796	1.4267e-08	6.03094e-08	8.8135
LARP6	0.0906774	-0.0975319	5.67341	1.47885e-08	6.2472e-08	8.77882
SEMA6A	-0.104275	-0.107404	-5.67099	1.49975e-08	6.33127e-08	8.76526
RUVBL2	0.0757591	0.472049	5.66974	1.51067e-08	6.37314e-08	8.75825
DNAH7	-0.0599388	-0.481514	-5.66831	1.52329e-08	6.42212e-08	8.75021
RNF10	-0.0578922	0.446289	-5.66683	1.53638e-08	6.473e-08	8.74195
TCN1	-0.271731	-0.181944	-5.65691	1.62725e-08	6.85128e-08	8.68645
IFITM1	-0.158115	1.32145	-5.65508	1.64456e-08	6.91546e-08	8.67623
NHP2L1	0.0681187	0.50637	5.65507	1.64467e-08	6.91546e-08	8.67616
CYB5R1	-0.0972515	0.765725	-5.65307	1.66379e-08	6.99124e-08	8.665
SGCB	0.0831164	-0.212687	5.6508	1.68577e-08	7.07889e-08	8.65232
KHDRBS3	0.11823	0.13594	5.64944	1.69912e-08	7.13022e-08	8.64471
MOSPD1	0.054503	-0.368664	5.64142	1.77963e-08	7.46316e-08	8.59999
NNMT	0.128166	0.557764	5.63953	1.79919e-08	7.54018e-08	8.58944
TFRC	0.133742	0.980181	5.63702	1.82544e-08	7.64514e-08	8.57545
CCL13	0.127339	-0.542101	5.63483	1.84857e-08	7.73692e-08	8.56329
SLC7A2	-0.213965	0.368097	-5.63323	1.86571e-08	7.8035e-08	8.55438
RPGR	-0.0502779	-0.348246	-5.63271	1.87137e-08	7.82202e-08	8.55145
E2F8	0.0900866	-0.617815	5.63254	1.87321e-08	7.82456e-08	8.55051
MBNL1	-0.0857602	0.186089	-5.62844	1.91795e-08	8.00618e-08	8.52771
GNAI3	0.0682583	0.2685	5.62516	1.95449e-08	8.15333e-08	8.50949
NINJ1	-0.0855328	1.02179	-5.62025	2.01054e-08	8.38164e-08	8.48219
HDAC9	0.0946607	-0.473682	5.61647	2.05469e-08	8.56008e-08	8.46122
RNF111	-0.0553079	-0.313679	-5.61541	2.06721e-08	8.60658e-08	8.45535
RAB8A	-0.0680906	0.823839	-5.61146	2.11476e-08	8.79718e-08	8.4334
RAD51C	0.086664	0.145792	5.61137	2.11576e-08	8.79718e-08	8.43294
MAPKAPK3	-0.0631974	0.492456	-5.60916	2.14277e-08	8.90365e-08	8.42069
OPRK1	0.0825012	-0.594557	5.60698	2.16983e-08	9.01021e-08	8.40857
SACM1L	-0.0697151	0.191448	-5.60557	2.18748e-08	9.07755e-08	8.40075
AAMP	0.0598625	0.216863	5.6043	2.20342e-08	9.13771e-08	8.39375
AZGP1	-0.264431	1.59153	-5.60371	2.21094e-08	9.16291e-08	8.39046
PSMB4	0.0830013	1.41673	5.60289	2.22134e-08	9.19999e-08	8.38593
MTMR11	-0.0812905	0.109079	-5.59666	2.30209e-08	9.52821e-08	8.35146
CCND1	-0.197098	1.67451	-5.59572	2.31457e-08	9.57361e-08	8.34624
POGK	-0.0819826	0.907282	-5.59488	2.32563e-08	9.61311e-08	8.34164
HSPA8	0.107205	2.16701	5.5926	2.35629e-08	9.73351e-08	8.32899
PTP4A1	0.0935494	0.127785	5.59206	2.36347e-08	9.75683e-08	8.32606
MAGOH	0.0900343	-0.0760861	5.59134	2.37333e-08	9.79115e-08	8.32204
PKP1	0.124738	-0.420018	5.58961	2.39687e-08	9.88182e-08	8.31251
TRIM2	0.102731	-0.150147	5.58696	2.43348e-08	1.00263e-07	8.29788
MKRN1	-0.0609803	1.22232	-5.58673	2.43675e-08	1.00332e-07	8.29658
PMAIP1	-0.159664	-0.246773	-5.58618	2.44435e-08	1.0058e-07	8.29358
RPIA	0.0593244	0.157766	5.58431	2.47069e-08	1.01598e-07	8.28323
IRF4	-0.0802205	-0.455097	-5.58039	2.52662e-08	1.0377e-07	8.26163
MAST2	0.0621687	-0.0885994	5.58038	2.5268e-08	1.0377e-07	8.26156
NOVA2	0.0530135	-0.783889	5.57859	2.55277e-08	1.04769e-07	8.25169
TCEAL1	-0.126976	0.252572	-5.57657	2.58246e-08	1.05919e-07	8.24053
AGPAT3	0.0686172	-0.0465902	5.57422	2.61723e-08	1.07276e-07	8.22762
SLC1A1	-0.220535	-0.471899	-5.57301	2.63547e-08	1.07954e-07	8.22092
FTL	0.0986994	2.8746	5.57117	2.66323e-08	1.0902e-07	8.21081
ARHGAP4	-0.0895094	-0.0491766	-5.56312	2.78828e-08	1.14066e-07	8.16653
SCD	0.187416	1.50039	5.56254	2.79762e-08	1.14327e-07	8.1633
AAAS	-0.0684044	-0.212689	-5.5625	2.79827e-08	1.14327e-07	8.16308
MAGEH1	0.0698393	-0.198714	5.56107	2.82109e-08	1.15185e-07	8.15524
GNG5	0.0723538	0.573721	5.55794	2.87181e-08	1.17181e-07	8.13804
EXOSC2	0.0519208	-0.0883392	5.5558	2.90693e-08	1.18538e-07	8.12632
OR1D2	0.0449307	-0.559232	5.55333	2.94815e-08	1.20142e-07	8.11273
SLC26A6	0.065522	-0.0890108	5.55065	2.99337e-08	1.21906e-07	8.09804
STK10	-0.0715271	-0.150783	-5.54735	3.05004e-08	1.24134e-07	8.07995
MECR	0.0585017	-0.425126	5.53786	3.21899e-08	1.30926e-07	8.02793
CDH1	0.185193	1.0394	5.53458	3.27937e-08	1.33297e-07	8.01
ABCG1	-0.0921614	0.0937424	-5.52901	3.38447e-08	1.3748e-07	7.97957
SLC9A2	0.117746	-0.531131	5.52821	3.39996e-08	1.38021e-07	7.97517
DOCK9	-0.0699862	-0.0496046	-5.52678	3.42754e-08	1.39052e-07	7.96737
ADAM28	-0.0990505	-0.534939	-5.52646	3.43386e-08	1.39219e-07	7.9656
CLIC3	0.157384	-0.188346	5.52603	3.44215e-08	1.39466e-07	7.96327
CFTR	0.0659215	-0.72196	5.52542	3.45405e-08	1.39859e-07	7.95994
TGFA	0.0973761	-0.690733	5.5221	3.51953e-08	1.4242e-07	7.94183
CCL18	0.170591	-0.668159	5.52033	3.55503e-08	1.43764e-07	7.93215
DHRS3	0.0858483	0.362833	5.51903	3.58128e-08	1.44734e-07	7.92505
HOOK1	-0.0940516	0.24752	-5.51858	3.59029e-08	1.45005e-07	7.92263
DGKD	-0.083787	-0.104915	-5.51445	3.67513e-08	1.48338e-07	7.9001
PGLYRP4	0.0403425	-0.502924	5.51351	3.69478e-08	1.49036e-07	7.89496
CAST	-0.0840113	0.483798	-5.50919	3.78609e-08	1.52622e-07	7.87141
DHX38	0.0650731	-0.119454	5.50893	3.79153e-08	1.52744e-07	7.87003
NDUFA8	0.0641471	0.893643	5.50861	3.79851e-08	1.52929e-07	7.86825
GALE	0.0989545	0.181359	5.50462	3.88496e-08	1.5631e-07	7.84655
SLC15A1	0.0876867	-0.750487	5.50379	3.90326e-08	1.56947e-07	7.84202
SLC16A2	0.0859692	-0.158211	5.50204	3.94189e-08	1.58399e-07	7.83252
ICA1	-0.0812491	0.433487	-5.49992	3.98935e-08	1.60205e-07	7.82098
TLX3	0.0906608	-0.733768	5.49874	4.01588e-08	1.61168e-07	7.81459
GNB2	0.0778198	0.512635	5.49848	4.02172e-08	1.61301e-07	7.81318
P2RY10	-0.0854722	-0.534881	-5.4978	4.03723e-08	1.61821e-07	7.80947
NCR1	0.0595471	-0.696197	5.49473	4.10759e-08	1.64537e-07	7.79281
RSAD2	0.170365	-0.136334	5.49324	4.14226e-08	1.65821e-07	7.78471
CTRC	0.0485452	-0.403686	5.49174	4.17745e-08	1.67124e-07	7.77655
FTCD	0.0664904	-0.648012	5.49012	4.21576e-08	1.68551e-07	7.76775
CLPP	0.0606015	0.284491	5.48862	4.25131e-08	1.69865e-07	7.75965
ACTR8	-0.0510362	-0.293217	-5.48833	4.25826e-08	1.70035e-07	7.75807
TNFRSF17	-0.156822	-0.458809	-5.48705	4.28904e-08	1.71157e-07	7.75113
TOPORS	-0.06447	-0.0758337	-5.4824	4.40267e-08	1.75581e-07	7.72592
ALK	0.0585201	-0.633466	5.47987	4.46564e-08	1.77981e-07	7.71222
ARMC1	0.0877836	0.373197	5.47865	4.49656e-08	1.791e-07	7.70557
KIF14	0.133736	-0.364812	5.47771	4.52022e-08	1.7993e-07	7.70051
GTF2A2	0.0644687	0.518965	5.47653	4.55041e-08	1.81018e-07	7.69409
PLSCR4	-0.105626	0.0129122	-5.47609	4.56164e-08	1.81351e-07	7.69172
KLF13	-0.108887	0.242505	-5.47339	4.63124e-08	1.84003e-07	7.67712
TNK2	-0.0777703	0.436565	-5.46648	4.81425e-08	1.91154e-07	7.63976
CD226	-0.0479308	-0.6458	-5.46617	4.82265e-08	1.91368e-07	7.63807
IMPA1	0.0809777	-0.117553	5.46544	4.84237e-08	1.9203e-07	7.63414
GTDC1	0.0424487	-0.252147	5.46405	4.88027e-08	1.93412e-07	7.62662
SLPI	0.199589	0.103945	5.46255	4.92141e-08	1.94921e-07	7.61853
VRK1	0.0779059	-0.142723	5.46179	4.94253e-08	1.95636e-07	7.6144
HRH1	0.0649359	-0.499655	5.4598	4.99787e-08	1.97702e-07	7.60367
HOXB3	-0.088876	-0.346676	-5.45922	5.01405e-08	1.98219e-07	7.60056
NUP37	0.0634719	0.412625	5.45597	5.10607e-08	2.01731e-07	7.58303
APBB1IP	-0.0841579	-0.0359462	-5.45521	5.12792e-08	2.02417e-07	7.57891
LMAN2	0.0739137	0.21746	5.45514	5.1298e-08	2.02417e-07	7.57856
ASPM	0.142039	-0.000643371	5.45299	5.19201e-08	2.04744e-07	7.56694
PCTP	0.102145	-0.286079	5.4511	5.24699e-08	2.06783e-07	7.55678
YPEL5	-0.0600956	0.789274	-5.45048	5.26524e-08	2.07374e-07	7.55344
PRLR	-0.130067	0.35564	-5.44837	5.32788e-08	2.09711e-07	7.54204
COL9A2	-0.117755	0.0480639	-5.44582	5.40432e-08	2.12588e-07	7.52831
TLE1	0.0909172	-0.0940123	5.44453	5.4432e-08	2.13984e-07	7.5214
CHRNA1	0.0563238	-0.555633	5.44375	5.46713e-08	2.14792e-07	7.51717
GORASP2	0.0562971	0.724766	5.44	5.5828e-08	2.19201e-07	7.49699
TIMM44	0.0612733	-0.0950212	5.43838	5.63325e-08	2.21045e-07	7.48832
S100A11	0.112771	1.40099	5.4365	5.69263e-08	2.23237e-07	7.47822
KIF3C	0.0557571	-0.345785	5.43634	5.69774e-08	2.23299e-07	7.47735
FOXD1	0.107132	-0.647873	5.43476	5.74838e-08	2.25145e-07	7.46883
PALM	-0.0883081	0.231678	-5.43428	5.7636e-08	2.25602e-07	7.46628
JPH3	0.0914455	-0.610961	5.4335	5.7887e-08	2.26445e-07	7.46209
PLA2G4C	-0.0999765	0.0706653	-5.43228	5.82838e-08	2.27856e-07	7.45551
MTF1	-0.0538519	0.0725215	-5.4317	5.84709e-08	2.28447e-07	7.45242
PLEKHM1	-0.0577658	-0.144638	-5.42639	6.0227e-08	2.35163e-07	7.4239
HSF2BP	0.0490385	-0.338787	5.42558	6.04992e-08	2.36081e-07	7.41956
NEK1	-0.0642844	-0.292355	-5.42416	6.09787e-08	2.37806e-07	7.41195
NUDT1	0.105008	0.149125	5.42377	6.11102e-08	2.38172e-07	7.40987
ADPGK	-0.0579581	0.386986	-5.42057	6.22077e-08	2.42301e-07	7.39272
SLC5A6	0.108995	0.772062	5.42031	6.22973e-08	2.42501e-07	7.39134
PLSCR1	0.104356	-0.0856587	5.42005	6.23888e-08	2.42708e-07	7.38992
ATP5L	0.0696315	0.531986	5.41988	6.24466e-08	2.42784e-07	7.38903
SMAD4	-0.0591862	0.272508	-5.41634	6.36903e-08	2.47468e-07	7.37003
LRRC42	0.0679014	0.261238	5.41585	6.38613e-08	2.47981e-07	7.36744
EIF4G3	-0.0740567	0.462779	-5.41298	6.48875e-08	2.51811e-07	7.35209
ITPKB	-0.0793968	0.185334	-5.41133	6.54854e-08	2.53976e-07	7.34325
JPH2	0.0438039	-0.760986	5.40752	6.68842e-08	2.59242e-07	7.32289
SP140	-0.0813207	-0.49363	-5.40269	6.87018e-08	2.66125e-07	7.29705
GBP2	-0.118168	0.942775	-5.40246	6.8791e-08	2.66308e-07	7.29581
SEC61B	0.0638068	1.21408	5.40215	6.89083e-08	2.666e-07	7.29416
ORMDL2	0.068212	-0.140186	5.40066	6.94781e-08	2.6864e-07	7.28623
TGOLN2	-0.0773025	1.05136	-5.40037	6.9591e-08	2.68913e-07	7.28467
MSR1	0.0716045	-0.324009	5.39435	7.19497e-08	2.77858e-07	7.25256
VRK3	-0.0594223	0.295281	-5.3939	7.21294e-08	2.78383e-07	7.25015
ARID1A	-0.0735153	0.609905	-5.39272	7.2602e-08	2.80036e-07	7.24386
TMPRSS3	-0.174969	-0.165402	-5.39089	7.33428e-08	2.82722e-07	7.23408
REPS2	-0.140765	0.200329	-5.38807	7.44939e-08	2.86985e-07	7.21908
SLBP	0.0785055	0.0607121	5.3878	7.46071e-08	2.87246e-07	7.21762
CDS2	-0.0739917	0.319858	-5.38219	7.69581e-08	2.96119e-07	7.18774
ING3	0.0621114	-0.286467	5.38045	7.76985e-08	2.98786e-07	7.17852
BMP7	0.0684202	-0.429898	5.37899	7.83277e-08	3.01023e-07	7.17075
CRLF3	-0.0690639	-0.0158367	-5.37772	7.88809e-08	3.02966e-07	7.16397
TMED3	0.0926844	1.43013	5.37686	7.92565e-08	3.04191e-07	7.1594
AGTPBP1	0.0650624	-0.292269	5.37677	7.92959e-08	3.04191e-07	7.15892
ANKRD27	0.0712663	-0.169375	5.37616	7.95611e-08	3.05024e-07	7.1557
SFN	0.131071	-0.00165178	5.375	8.00737e-08	3.06804e-07	7.14952
FCGR2B	0.0895099	-0.355509	5.37477	8.01743e-08	3.07004e-07	7.14831
RAB17	-0.115033	0.376112	-5.37274	8.10757e-08	3.10269e-07	7.13754
PDLIM7	0.0708636	0.0654997	5.36947	8.25518e-08	3.15727e-07	7.12016
KCNJ15	0.0600262	-0.659208	5.36645	8.39385e-08	3.20837e-07	7.10412
PPP3CC	-0.0564706	-0.0784281	-5.3645	8.48465e-08	3.24113e-07	7.09376
SPTB	0.0650903	-0.606272	5.36141	8.62987e-08	3.29461e-07	7.07742
BCL7B	0.053345	0.121228	5.35726	8.82957e-08	3.36883e-07	7.05539
GGA1	0.0533452	-0.346458	5.35643	8.86987e-08	3.38217e-07	7.05101
NOL8	-0.0655207	-0.0320187	-5.35355	9.01124e-08	3.43401e-07	7.03578
PEPD	0.0665687	0.601952	5.35318	9.02953e-08	3.43892e-07	7.03383
NPEPPS	-0.0881858	0.559277	-5.35306	9.03568e-08	3.4392e-07	7.03317
NFAT5	-0.0899526	-0.0580163	-5.34959	9.20944e-08	3.50323e-07	7.01483
SLC34A1	0.064084	-0.603547	5.34924	9.22746e-08	3.50798e-07	7.01295
ANAPC2	-0.0612444	-0.21788	-5.34899	9.24006e-08	3.51067e-07	7.01164
CDH3	0.213192	0.0403124	5.34807	9.28702e-08	3.5264e-07	7.00676
TRPM3	0.0475322	-0.660833	5.34713	9.33509e-08	3.54174e-07	7.00179
PRDM2	-0.0527085	-0.185757	-5.34706	9.33858e-08	3.54174e-07	7.00143
FGF6	0.0574697	-0.617479	5.3446	9.46539e-08	3.58769e-07	6.98844
ETV2	0.0660806	-0.608833	5.34225	9.5881e-08	3.63203e-07	6.97604
HOXD11	0.0729075	-0.620004	5.33857	9.78406e-08	3.70405e-07	6.95656
FKBP14	0.0773647	-0.0485055	5.3377	9.83062e-08	3.71946e-07	6.95199
KLF10	0.0822832	0.106618	5.3369	9.87395e-08	3.73362e-07	6.94776
TPST1	0.0715852	-0.0700342	5.33651	9.89508e-08	3.73938e-07	6.9457
ITGA4	-0.0772189	-0.506318	-5.33634	9.90435e-08	3.74066e-07	6.9448
MTCH1	0.0594084	1.48116	5.33587	9.92952e-08	3.74794e-07	6.94236
ENTPD4	-0.0583581	0.0079002	-5.32989	1.02602e-07	3.87043e-07	6.91083
FLII	-0.0740564	0.639317	-5.32466	1.05582e-07	3.98049e-07	6.88326
OSTF1	0.0599832	0.48114	5.32146	1.07444e-07	4.0483e-07	6.86644
SRP72	0.0644836	0.529523	5.3196	1.08543e-07	4.08727e-07	6.85664
SEMA3C	-0.136725	0.101768	-5.31927	1.08738e-07	4.0922e-07	6.85491
WSB2	0.0735066	0.115423	5.31633	1.10503e-07	4.15613e-07	6.83942
B3GAT1	0.0727612	-0.723224	5.31484	1.11405e-07	4.1876e-07	6.83159
MEPE	0.0649958	-0.714114	5.31367	1.12116e-07	4.21182e-07	6.82547
ARF5	0.0725278	0.851905	5.31179	1.13276e-07	4.25288e-07	6.81556
SPTA1	0.0498307	-0.625933	5.31143	1.13499e-07	4.25874e-07	6.81367
GML	0.0492131	-0.568221	5.30841	1.15386e-07	4.32698e-07	6.7978
CLIC5	-0.0707734	-0.439692	-5.308	1.15642e-07	4.3334e-07	6.79567
RAN	0.075443	0.695525	5.30792	1.15694e-07	4.3334e-07	6.79524
CLK1	-0.103296	0.0356915	-5.30669	1.16471e-07	4.35995e-07	6.78879
ATP2B3	0.0528582	-0.705298	5.30093	1.20187e-07	4.49638e-07	6.75858
FEM1C	-0.0785126	0.309533	-5.29892	1.21505e-07	4.54301e-07	6.74808
CSNK1D	0.0695041	0.677705	5.29626	1.23283e-07	4.60676e-07	6.7341
RARRES1	0.206284	0.155304	5.29568	1.23671e-07	4.61855e-07	6.73108
PTEN	-0.0753791	0.870558	-5.29318	1.25361e-07	4.67892e-07	6.71802
MAST1	0.0759916	-0.743124	5.28646	1.30029e-07	4.8503e-07	6.68284
NDUFC1	0.0640201	0.640763	5.28456	1.31378e-07	4.89772e-07	6.67291
COLEC10	0.0784831	-0.711108	5.284	1.31775e-07	4.90965e-07	6.67001
MRPL22	0.0617841	0.327889	5.28335	1.32247e-07	4.92432e-07	6.66657
MAEA	0.0625644	0.0235643	5.27932	1.35167e-07	5.03011e-07	6.64556
RAD23B	0.0688774	0.733923	5.27891	1.35466e-07	5.03829e-07	6.64343
DEGS1	0.117176	0.563984	5.2745	1.38746e-07	5.15727e-07	6.62042
MCM6	0.0931686	0.64772	5.27364	1.39395e-07	5.17834e-07	6.61593
HPX	-0.133801	-0.227299	-5.26976	1.42358e-07	5.28435e-07	6.5957
MRPL16	0.0507534	0.0212683	5.26969	1.42415e-07	5.28435e-07	6.59531
PLA2G10	-0.139252	-0.285915	-5.26805	1.43684e-07	5.32833e-07	6.58677
CYCS	0.0727765	0.276792	5.26734	1.44236e-07	5.34566e-07	6.58309
BTC	0.0895931	-0.562529	5.26723	1.44322e-07	5.34572e-07	6.58252
KLF11	0.0651818	0.186262	5.2652	1.45921e-07	5.40182e-07	6.57191
SLC35D2	-0.0606165	-0.167413	-5.2594	1.50571e-07	5.5707e-07	6.54174
SCNN1B	0.0952746	-0.346556	5.25906	1.50846e-07	5.57762e-07	6.53999
ACN9	0.0979706	-0.0683379	5.2584	1.51386e-07	5.59431e-07	6.53655
EDA	0.0403448	-0.558335	5.25826	1.51501e-07	5.59533e-07	6.53582
FADS3	0.0743474	-0.450029	5.25563	1.53674e-07	5.67228e-07	6.52212
PAFAH1B2	0.05004	-0.155952	5.24908	1.59206e-07	5.87304e-07	6.48811
GOLGA3	-0.0578334	0.884922	-5.24764	1.60443e-07	5.91522e-07	6.48067
DECR1	0.0800372	0.721813	5.24752	1.60554e-07	5.91587e-07	6.48001
MAK	-0.101553	-0.577709	-5.24651	1.61424e-07	5.94447e-07	6.47481
KCNB1	0.0567357	-0.546567	5.2453	1.62485e-07	5.98008e-07	6.46851
ZNF165	0.102682	-0.251439	5.24494	1.62802e-07	5.9883e-07	6.46663
PPP5C	0.0582169	-0.276036	5.24287	1.64631e-07	6.05207e-07	6.45589
SYT11	-0.0602655	0.132965	-5.2416	1.65763e-07	6.09012e-07	6.4493
YES1	0.10021	0.269072	5.24118	1.66138e-07	6.10039e-07	6.44713
PLEKHA4	-0.0880726	-0.251206	-5.23852	1.68538e-07	6.18494e-07	6.43334
SHC1	-0.0706585	1.03387	-5.23568	1.71136e-07	6.27663e-07	6.41863
ICOS	-0.100465	-0.529055	-5.23555	1.71251e-07	6.27723e-07	6.41798
VANGL1	0.0706154	-0.288576	5.23478	1.71963e-07	6.29969e-07	6.41399
BANK1	-0.109765	-0.480856	-5.23339	1.73255e-07	6.34334e-07	6.4068
LRP10	-0.0793252	1.00837	-5.22885	1.77541e-07	6.49622e-07	6.3833
KDELR3	0.0981023	0.226262	5.22875	1.77635e-07	6.49622e-07	6.38279
KHK	0.0499787	-0.667247	5.22802	1.78332e-07	6.51796e-07	6.37903
DPM2	0.0584142	0.21756	5.22616	1.80128e-07	6.57982e-07	6.36939
MAN2A2	-0.0559701	-0.134905	-5.22453	1.81708e-07	6.63371e-07	6.36099
ARNTL2	0.0891338	-0.574349	5.22153	1.84667e-07	6.73786e-07	6.34546
MRPS27	-0.0621424	0.400183	-5.22066	1.85525e-07	6.76528e-07	6.34101
RNPS1	0.06326	0.621832	5.22016	1.86025e-07	6.77959e-07	6.33842
HSPH1	0.104519	0.861333	5.21882	1.87368e-07	6.82464e-07	6.3315
NET1	0.111869	0.327676	5.21737	1.88832e-07	6.87399e-07	6.32403
KTN1	-0.120902	0.854575	-5.21488	1.91379e-07	6.96273e-07	6.31114
MARK1	0.0716876	-0.394135	5.21345	1.92853e-07	7.01233e-07	6.30377
DMRT1	0.0788245	-0.739442	5.21291	1.93413e-07	7.02866e-07	6.30098
PKD2L1	0.0770662	-0.568922	5.21229	1.94055e-07	7.04796e-07	6.2978
ONECUT2	0.0661223	-0.575211	5.21052	1.959e-07	7.11091e-07	6.2887
GLA	-0.148863	0.547331	-5.21026	1.96172e-07	7.11309e-07	6.28737
TLN1	-0.0788582	0.858126	-5.21025	1.96185e-07	7.11309e-07	6.28731
ABCE1	0.0663365	0.318183	5.20899	1.97518e-07	7.15735e-07	6.28079
CPB2	0.0855018	-0.699833	5.20884	1.9768e-07	7.15912e-07	6.28001
PLA2G5	0.0636014	-0.570955	5.20749	1.99106e-07	7.20665e-07	6.2731
MAP3K4	-0.0589872	0.227519	-5.20695	1.9969e-07	7.22368e-07	6.27028
ZNF410	-0.0451381	0.175907	-5.20506	2.01719e-07	7.2929e-07	6.26057
TGFBI	0.128864	1.15623	5.20473	2.02078e-07	7.30173e-07	6.25886
B3GNT3	0.0738483	-0.571539	5.20458	2.0224e-07	7.30342e-07	6.25809
TP53	-0.0883367	-0.0287867	-5.20406	2.02804e-07	7.31964e-07	6.25541
FKBP2	0.0735321	0.0363157	5.20298	2.03983e-07	7.358e-07	6.24984
MCC	-0.0634625	-0.301589	-5.2016	2.05488e-07	7.40809e-07	6.24277
PGRMC1	0.0921683	1.12058	5.20112	2.06017e-07	7.42294e-07	6.2403
CRYZ	-0.0997234	0.360916	-5.19818	2.09287e-07	7.53648e-07	6.22516
ADAM17	0.0534265	-0.189566	5.19489	2.13007e-07	7.66607e-07	6.20823
CLDN5	-0.10037	-0.113787	-5.19428	2.13697e-07	7.68654e-07	6.20512
AKR1B10	0.128802	-0.571378	5.19404	2.13967e-07	7.69192e-07	6.20391
CCK	0.0777951	-0.698621	5.19357	2.14513e-07	7.70718e-07	6.20146
VDAC1	0.068433	1.28648	5.19214	2.16153e-07	7.76169e-07	6.19414
DDX47	0.0576786	0.140993	5.19059	2.17951e-07	7.82184e-07	6.18618
HTR1E	0.0707516	-0.574285	5.18715	2.21999e-07	7.96259e-07	6.1685
SLC2A5	0.0782976	-0.258905	5.18504	2.24504e-07	8.04791e-07	6.15771
CDC14A	-0.0887129	-0.520436	-5.17983	2.30835e-07	8.2677e-07	6.13099
ARF3	-0.0760925	0.922256	-5.17977	2.30909e-07	8.2677e-07	6.13068
IL4R	-0.0737017	0.173441	-5.17967	2.31027e-07	8.2677e-07	6.13019
UBL3	-0.0858532	0.459371	-5.17846	2.32525e-07	8.31664e-07	6.12398
ARNTL	-0.0684668	-0.186734	-5.17317	2.39174e-07	8.54963e-07	6.09689
LSM4	0.0868398	0.816552	5.17222	2.40385e-07	8.58806e-07	6.09204
PLK4	0.0744273	-0.318531	5.17189	2.40807e-07	8.5983e-07	6.09036
RBKS	-0.0739266	-0.130661	-5.17038	2.42749e-07	8.66278e-07	6.08264
MTL5	-0.123698	-0.131156	-5.16791	2.45965e-07	8.77261e-07	6.06999
PLXNC1	-0.0730809	-0.341973	-5.16616	2.48267e-07	8.84975e-07	6.06104
SERPING1	-0.114676	0.999506	-5.1656	2.49006e-07	8.87108e-07	6.05819
RRAGA	-0.0593862	1.02239	-5.16166	2.54278e-07	9.05385e-07	6.03806
LEPROTL1	-0.0655147	0.367114	-5.15982	2.56779e-07	9.13775e-07	6.02866
NDRG4	0.0916755	-0.355086	5.15948	2.57238e-07	9.14898e-07	6.02694
FPR1	0.0680174	-0.491603	5.15898	2.5793e-07	9.16843e-07	6.02436
ZDHHC6	-0.049058	0.47478	-5.15784	2.59492e-07	9.21881e-07	6.01856
SEC14L1	0.0607905	0.0427277	5.15693	2.60743e-07	9.25806e-07	6.01394
ADAMTS7	0.0633045	-0.549852	5.15143	2.68471e-07	9.52711e-07	5.98589
GJB1	0.0660972	-0.495218	5.15034	2.70034e-07	9.57722e-07	5.98031
XK	0.0790574	-0.610711	5.15013	2.70335e-07	9.58253e-07	5.97924
SSR3	0.0782608	0.156003	5.14905	2.71877e-07	9.63182e-07	5.97378
PKN2	-0.0602082	-0.218456	-5.14847	2.72715e-07	9.65142e-07	5.97082
FBXO38	-0.0694666	-0.342942	-5.14846	2.72734e-07	9.65142e-07	5.97075
RAPGEF3	-0.0873512	-0.416529	-5.14834	2.72904e-07	9.65205e-07	5.97015
SRP19	0.0595452	0.465837	5.14818	2.73144e-07	9.65516e-07	5.96931
PLA1A	-0.0889741	-0.481869	-5.14536	2.77257e-07	9.79508e-07	5.95495
MBP	-0.0842143	0.131486	-5.14385	2.79481e-07	9.86815e-07	5.94728
FGB	0.159054	-0.603628	5.14249	2.81498e-07	9.93386e-07	5.94037
HMOX1	0.105952	0.0355391	5.14213	2.82044e-07	9.94759e-07	5.93851
RHOA	-0.0719296	1.88857	-5.14096	2.83784e-07	1.00034e-06	5.93261
CCNA1	0.0758038	-0.564372	5.14071	2.84169e-07	1.00081e-06	5.93131
KCNJ4	0.0585849	-0.723716	5.14067	2.84232e-07	1.00081e-06	5.93109
HOXC13	0.102983	-0.268719	5.13431	2.93952e-07	1.03446e-06	5.8988
GPR56	0.0841191	-0.204615	5.13375	2.94826e-07	1.03696e-06	5.89595
COQ7	-0.0665741	-0.174159	-5.12804	3.03863e-07	1.06815e-06	5.86695
SVIL	-0.0756123	0.605063	-5.12723	3.05157e-07	1.07211e-06	5.86287
TSPYL2	-0.0594244	-0.0224762	-5.1245	3.09596e-07	1.0871e-06	5.849
ZNF76	-0.0599518	-0.185821	-5.12359	3.11076e-07	1.09169e-06	5.84443
SLC1A5	0.0848146	0.513945	5.12112	3.15173e-07	1.10546e-06	5.83186
POLA2	0.0694595	0.0694964	5.1169	3.22258e-07	1.12968e-06	5.81052
TGM5	0.106412	-0.635169	5.11436	3.26595e-07	1.14426e-06	5.79768
PHLDA1	0.113999	0.292379	5.11296	3.29012e-07	1.15201e-06	5.7906
KCNH2	0.110005	-0.702337	5.11287	3.29172e-07	1.15201e-06	5.79013
IFNA5	0.0483333	-0.664766	5.10862	3.36617e-07	1.17735e-06	5.76866
KLF1	0.0476512	-0.613505	5.10853	3.36784e-07	1.17735e-06	5.76819
FNDC4	0.0632091	-0.478321	5.10797	3.37786e-07	1.18021e-06	5.76533
STYK1	0.098761	-0.696193	5.1076	3.38441e-07	1.18184e-06	5.76348
BCL11B	-0.103346	-0.330548	-5.10638	3.40621e-07	1.1888e-06	5.75731
SLC9A3	0.0506421	-0.743316	5.10403	3.44856e-07	1.20292e-06	5.74545
TERF2	0.0518782	0.0506713	5.1024	3.47828e-07	1.21262e-06	5.73721
MTRF1	-0.0674941	-0.481454	-5.09909	3.53928e-07	1.23321e-06	5.72052
DHTKD1	0.0880102	0.111161	5.09887	3.54342e-07	1.23397e-06	5.7194
SDHB	0.0595484	0.794886	5.09866	3.54729e-07	1.23464e-06	5.71835
SLC27A2	-0.192574	-0.244377	-5.09745	3.56997e-07	1.24186e-06	5.71223
EPHA5	0.0534957	-0.707864	5.09621	3.59316e-07	1.24924e-06	5.70602
LSS	0.0641884	0.360661	5.09385	3.63809e-07	1.26417e-06	5.69409
CRYAB	0.1836	0.345539	5.09212	3.6712e-07	1.27497e-06	5.6854
DNASE1L3	-0.0694053	-0.49093	-5.09146	3.68397e-07	1.27871e-06	5.68206
CXCR6	-0.0814704	-0.492855	-5.0909	3.69475e-07	1.28121e-06	5.67926
TAOK1	-0.0830126	0.254771	-5.09088	3.69522e-07	1.28121e-06	5.67914
FASTK	0.0642585	0.201469	5.08955	3.72115e-07	1.2895e-06	5.67242
HMGN3	0.0855983	-0.178162	5.08932	3.72563e-07	1.29035e-06	5.67127
KIAA0355	-0.0625084	0.440092	-5.08877	3.73626e-07	1.29332e-06	5.66854
DEFB1	0.17596	-0.384617	5.08713	3.76851e-07	1.30377e-06	5.66029
DBP	-0.0674696	-0.217193	-5.08675	3.77614e-07	1.3057e-06	5.65834
RGS16	0.0941527	-0.0322845	5.08629	3.78526e-07	1.30814e-06	5.65603
OGDHL	0.0681872	-0.749368	5.08542	3.80247e-07	1.31337e-06	5.65168
CST6	0.141536	-0.280354	5.08335	3.84406e-07	1.32702e-06	5.64124
STMN3	0.0988393	-0.422311	5.08235	3.86428e-07	1.33327e-06	5.6362
CRKL	-0.0520054	0.689033	-5.0822	3.8672e-07	1.33355e-06	5.63548
TLE2	-0.0805854	0.103991	-5.07996	3.91297e-07	1.3486e-06	5.62419
CHRNB3	0.0429944	-0.576207	5.07912	3.93017e-07	1.3538e-06	5.61998
GATM	-0.11089	-0.126496	-5.07797	3.9538e-07	1.3612e-06	5.61422
CBFB	0.0698948	0.318751	5.07533	4.00889e-07	1.37942e-06	5.60094
XRCC3	-0.0706087	-0.430211	-5.07515	4.01271e-07	1.37998e-06	5.60003
FRAT1	-0.0557759	-0.386865	-5.07492	4.01758e-07	1.38091e-06	5.59887
VDAC3	0.0759519	1.02741	5.07145	4.091e-07	1.40538e-06	5.58149
DDB2	-0.055768	-0.327037	-5.0713	4.09432e-07	1.40576e-06	5.58071
LLGL2	0.0947575	-0.0479261	5.07011	4.11988e-07	1.41377e-06	5.57474
ALDH2	-0.116843	0.633674	-5.0694	4.13505e-07	1.41821e-06	5.57121
SEPHS2	0.089263	0.663635	5.06901	4.14365e-07	1.42039e-06	5.56922
SLC25A28	-0.0545659	0.46227	-5.06866	4.15127e-07	1.42224e-06	5.56746
PLAA	0.0482311	-0.370946	5.0665	4.19824e-07	1.43755e-06	5.55666
GPS1	0.0773335	0.794291	5.06166	4.30573e-07	1.47356e-06	5.5324
UBE2A	0.0501408	0.587925	5.06144	4.31077e-07	1.47449e-06	5.53128
ARMC8	0.0522974	-0.0770778	5.05903	4.3652e-07	1.49231e-06	5.51924
DSP	-0.155829	1.3308	-5.05728	4.40529e-07	1.5052e-06	5.51047
BZW2	0.0847615	0.874164	5.05483	4.4618e-07	1.52313e-06	5.49824
ARMCX1	-0.111135	0.208281	-5.0548	4.46258e-07	1.52313e-06	5.49808
AKR1C4	0.0979164	-0.359952	5.05292	4.50645e-07	1.53728e-06	5.48869
PMM1	0.0578081	0.297937	5.05016	4.57173e-07	1.55871e-06	5.47489
PLVAP	-0.0839483	0.25968	-5.04989	4.57835e-07	1.55993e-06	5.4735
MIS12	-0.0581118	0.105234	-5.04981	4.58022e-07	1.55993e-06	5.47311
MPP5	-0.0644213	-0.0458612	-5.04829	4.61657e-07	1.57146e-06	5.46553
GTF3C1	-0.0690965	0.535244	-5.04771	4.63053e-07	1.57537e-06	5.46263
TULP4	-0.0751725	0.446244	-5.04048	4.80796e-07	1.63486e-06	5.42656
KLHL12	-0.0717758	0.431725	-5.03948	4.83295e-07	1.64248e-06	5.42159
CNOT8	-0.0630651	0.207662	-5.03727	4.88877e-07	1.66056e-06	5.41058
BET1L	-0.0629243	-0.138736	-5.03706	4.89427e-07	1.66154e-06	5.4095
ARPC3	0.0670175	1.07674	5.03609	4.91896e-07	1.66903e-06	5.40467
ZFHX4	-0.0890734	-0.365765	-5.03571	4.92863e-07	1.67141e-06	5.40279
CYP7B1	0.0817287	-0.560921	5.03362	4.98236e-07	1.68873e-06	5.39239
GOLGA5	-0.0671101	0.52192	-5.03291	5.00078e-07	1.69407e-06	5.38885
SDS	0.0612803	-0.246218	5.03245	5.01291e-07	1.69727e-06	5.38653
FABP7	0.223352	-0.778617	5.03149	5.03773e-07	1.70477e-06	5.38179
CPLX2	0.0937023	-0.847338	5.02958	5.08809e-07	1.72089e-06	5.37225
KPNB1	-0.0588995	1.43053	-5.02311	5.26159e-07	1.77863e-06	5.34009
AIM1	0.128403	-0.00339844	5.02229	5.28403e-07	1.78456e-06	5.33601
CSTF2	0.0508567	0.174955	5.02226	5.28478e-07	1.78456e-06	5.33588
GFAP	0.0660671	-0.795338	5.02017	5.34229e-07	1.80302e-06	5.3255
LRIG2	-0.0399715	-0.267427	-5.01679	5.43666e-07	1.83312e-06	5.30871
EPM2A	0.0402834	-0.504229	5.01677	5.43724e-07	1.83312e-06	5.3086
POLR2G	0.0591228	0.874666	5.01666	5.44036e-07	1.8332e-06	5.30806
TRIP11	-0.0669029	0.21662	-5.01473	5.49489e-07	1.85059e-06	5.29849
SSRP1	0.0699152	0.274561	5.01379	5.52186e-07	1.85868e-06	5.2938
SLC2A9	0.0442393	-0.340799	5.01304	5.54327e-07	1.8649e-06	5.29009
UVRAG	-0.067078	0.00594657	-5.00815	5.68525e-07	1.91165e-06	5.26584
SLC4A8	-0.118828	-0.442338	-5.0065	5.73385e-07	1.92697e-06	5.25768
IGFBP1	0.0855813	-0.697858	5.0038	5.81441e-07	1.95302e-06	5.2443
PECAM1	-0.090818	0.591137	-5.0027	5.84763e-07	1.96313e-06	5.23884
AP2A2	-0.0428195	0.0941516	-5.00254	5.85224e-07	1.96364e-06	5.23808
CPT1A	0.0825822	0.06685	5.00215	5.86424e-07	1.96663e-06	5.23612
RPS6	-0.089931	2.49391	-5.00195	5.87009e-07	1.96755e-06	5.23516
NFKBIB	0.0611276	-0.325626	4.99799	5.99137e-07	2.00714e-06	5.21556
PIP	-0.34931	0.873006	-4.99787	5.99514e-07	2.00735e-06	5.21495
ACBD4	-0.0678912	-0.410983	-4.99761	6.00324e-07	2.009e-06	5.21366
PNPLA4	-0.0898951	-0.247273	-4.99739	6.01007e-07	2.01022e-06	5.21257
MVK	0.0614778	-0.371861	4.99585	6.05807e-07	2.02521e-06	5.20495
DNAJC13	-0.0547203	0.208321	-4.99422	6.10895e-07	2.04114e-06	5.19693
LGI2	0.0539618	-0.597768	4.99344	6.13379e-07	2.04836e-06	5.19304
GRB2	0.0787595	0.547457	4.99153	6.1942e-07	2.06745e-06	5.18364
HMOX2	0.0509203	-0.222599	4.99135	6.19996e-07	2.06828e-06	5.18275
ABCA6	-0.0667022	-0.43968	-4.99079	6.21805e-07	2.07323e-06	5.17996
TACC3	0.0945934	-0.0869125	4.98947	6.26031e-07	2.08622e-06	5.17347
DPP6	0.0672567	-0.612628	4.98853	6.29094e-07	2.09473e-06	5.16879
TMEM14A	0.0813185	0.463119	4.98848	6.29245e-07	2.09473e-06	5.16856
DAZAP1	0.0542001	0.31904	4.98819	6.30189e-07	2.09677e-06	5.16712
CYP4F12	-0.0738995	-0.517794	-4.98226	6.49704e-07	2.16057e-06	5.13789
ETV6	-0.0754143	0.340011	-4.98124	6.53141e-07	2.17087e-06	5.13283
AMPD2	0.0459885	-0.344043	4.9741	6.77533e-07	2.25076e-06	5.0977
ATF3	0.140041	0.1085	4.96997	6.92066e-07	2.29783e-06	5.07736
MATN3	-0.139446	-0.247179	-4.96932	6.94378e-07	2.3043e-06	5.07416
LRRC20	0.0713468	-0.104604	4.96788	6.99505e-07	2.3201e-06	5.06711
UBE3C	0.0608575	0.681667	4.96739	7.01294e-07	2.32482e-06	5.06466
NSD1	-0.0544629	0.004645	-4.9632	7.16512e-07	2.37403e-06	5.04409
HUS1	0.0392943	-0.496002	4.96232	7.19745e-07	2.3835e-06	5.03978
ZNF263	-0.0575876	0.369445	-4.96123	7.23782e-07	2.39561e-06	5.03442
THOC1	-0.0636546	0.219168	-4.96089	7.25036e-07	2.39852e-06	5.03276
LHX2	0.0759852	-0.642334	4.95977	7.29212e-07	2.41107e-06	5.02726
NKX2-5	0.08198	-0.704737	4.95901	7.32076e-07	2.41928e-06	5.0235
YIPF1	-0.0635629	0.591611	-4.95857	7.33691e-07	2.42336e-06	5.02139
ESD	-0.058512	0.848182	-4.95814	7.3533e-07	2.42751e-06	5.01925
TBC1D5	-0.052491	-0.110929	-4.95762	7.37301e-07	2.43152e-06	5.01669
PDE8B	-0.126983	-0.248273	-4.95761	7.37312e-07	2.43152e-06	5.01668
TBK1	-0.0542101	0.397293	-4.95681	7.40349e-07	2.44027e-06	5.01274
EXT1	0.0718378	0.22297	4.95617	7.42778e-07	2.447e-06	5.0096
SNRPB2	0.0620601	0.541367	4.95377	7.51954e-07	2.47595e-06	4.99783
SCNN1D	-0.060746	-0.291357	-4.94934	7.69179e-07	2.53135e-06	4.97614
ASPH	0.103438	0.124592	4.94914	7.69967e-07	2.53263e-06	4.97516
COL6A1	-0.135368	1.51673	-4.94227	7.97501e-07	2.62184e-06	4.9415
HTN1	0.0619555	-0.682672	4.93959	8.0847e-07	2.65652e-06	4.92841
ABCF2	0.0569207	0.165606	4.93874	8.12e-07	2.66674e-06	4.92424
PTPN13	-0.106523	-0.103488	-4.93831	8.13749e-07	2.6711e-06	4.92218
SPTBN1	-0.0844119	0.662574	-4.93775	8.16106e-07	2.67745e-06	4.91941
GPR161	0.0643413	-0.522259	4.93643	8.21622e-07	2.69416e-06	4.91296
CXCL9	-0.245647	0.317097	-4.93538	8.26017e-07	2.70717e-06	4.90785
DPYSL4	0.0711124	-0.415066	4.93363	8.33409e-07	2.72998e-06	4.89931
ITPA	0.0538173	0.178995	4.93351	8.33945e-07	2.73033e-06	4.8987
FLOT2	-0.0704355	1.06639	-4.93131	8.43345e-07	2.75968e-06	4.88796
SPTLC2	-0.0761813	0.248116	-4.92979	8.49885e-07	2.77959e-06	4.88056
SUCLG2	-0.0730786	0.59226	-4.92969	8.50304e-07	2.77959e-06	4.88009
WDR45	0.0448112	-0.160087	4.92697	8.6216e-07	2.81689e-06	4.86683
TTYH1	0.162931	-0.837143	4.92631	8.65083e-07	2.82499e-06	4.86359
FBXO9	0.0549801	0.029714	4.92487	8.71453e-07	2.84433e-06	4.85656
PARD3	0.064341	-0.25219	4.91933	8.9634e-07	2.92405e-06	4.8296
PADI3	0.0707205	-0.672907	4.91917	8.97082e-07	2.92497e-06	4.8288
PRKCE	-0.0475249	-0.415107	-4.91895	8.98105e-07	2.9268e-06	4.82771
LILRA5	0.0590539	-0.436608	4.91765	9.04017e-07	2.94455e-06	4.82143
LPXN	-0.0828495	0.377124	-4.91601	9.11594e-07	2.96771e-06	4.81344
COL15A1	-0.113321	0.665955	-4.91473	9.1755e-07	2.98557e-06	4.8072
MYH13	0.0608181	-0.69343	4.91405	9.20714e-07	2.99433e-06	4.80391
SMTN	0.0652813	0.0825952	4.91386	9.21627e-07	2.99576e-06	4.80296
MRAS	0.0931044	-0.391687	4.91357	9.22978e-07	2.99861e-06	4.80155
PNMA2	-0.081402	-0.468626	-4.91319	9.24763e-07	3.00288e-06	4.7997
TCEA2	-0.0762841	0.275151	-4.9096	9.41738e-07	3.05643e-06	4.78229
UBQLN3	0.0454311	-0.530336	4.90871	9.46036e-07	3.06881e-06	4.77793
PPFIBP2	-0.0772633	0.442175	-4.90658	9.56321e-07	3.10059e-06	4.76758
INADL	-0.0732321	-0.130785	-4.9052	9.62994e-07	3.11923e-06	4.76092
PSMD11	0.0735682	-0.0554332	4.90519	9.63054e-07	3.11923e-06	4.76086
PTPRU	0.0604286	-0.301503	4.90369	9.70436e-07	3.14154e-06	4.75355
MYL4	0.0462363	-0.516957	4.90325	9.72581e-07	3.14688e-06	4.75143
SLAMF7	-0.0980158	-0.53819	-4.89958	9.90814e-07	3.20424e-06	4.73365
NIPSNAP3B	0.0394244	-0.578693	4.89846	9.96496e-07	3.22097e-06	4.72818
CLGN	-0.167156	-0.443621	-4.89748	1.00144e-06	3.23531e-06	4.72344
PHKB	0.0725556	0.420899	4.89403	1.01906e-06	3.29055e-06	4.70674
BLM	0.0713292	-0.309769	4.89338	1.02244e-06	3.29977e-06	4.70358
NFIC	-0.0867602	0.905056	-4.892	1.02961e-06	3.32031e-06	4.69689
HOXB13	0.109849	-0.87021	4.89195	1.02984e-06	3.32031e-06	4.69667
CD28	-0.0590503	-0.539772	-4.89098	1.0349e-06	3.33491e-06	4.69198
ABI1	0.0614824	0.246755	4.88871	1.04687e-06	3.37178e-06	4.68097
SECTM1	0.106235	-0.362156	4.88617	1.06039e-06	3.41359e-06	4.66869
POLRMT	-0.0498157	0.248251	-4.8806	1.09064e-06	3.50919e-06	4.64177
ELOVL4	0.0890472	-0.496545	4.87989	1.09457e-06	3.52005e-06	4.63832
ARHGEF10	-0.0701423	0.037101	-4.87873	1.10096e-06	3.53879e-06	4.63276
ATP9B	-0.0462554	-0.396658	-4.87749	1.10787e-06	3.55921e-06	4.62677
RAB1A	0.0660262	0.514288	4.87588	1.1169e-06	3.5864e-06	4.619
RUNX3	-0.0956526	0.0870485	-4.87403	1.12738e-06	3.61823e-06	4.61006
ATP2C1	0.0658498	0.368659	4.87383	1.12851e-06	3.62001e-06	4.6091
ATP5O	0.0556211	1.19668	4.87285	1.13412e-06	3.63618e-06	4.60435
SLC2A4	0.0603816	-0.685805	4.87247	1.13629e-06	3.64129e-06	4.60253
TOB2	-0.0678741	0.0541697	-4.87148	1.14198e-06	3.65766e-06	4.59775
RAB26	-0.104386	0.0193284	-4.87134	1.14277e-06	3.65836e-06	4.59709
POLR3D	0.0449408	-0.366317	4.87117	1.14372e-06	3.65957e-06	4.59628
IDH1	0.0918309	0.437826	4.87055	1.14734e-06	3.66928e-06	4.59327
OLFML2B	-0.0982291	0.444181	-4.86887	1.15708e-06	3.69856e-06	4.58518
PI3	0.106933	-0.572715	4.86797	1.16232e-06	3.71216e-06	4.58085
BMPR1A	0.0563938	0.0115898	4.86794	1.1625e-06	3.71216e-06	4.5807
LMO2	-0.0651029	0.0370064	-4.86784	1.16311e-06	3.71225e-06	4.5802
DOK4	0.0492548	-0.363812	4.86692	1.16851e-06	3.72759e-06	4.57577
WDR37	-0.057703	0.240671	-4.86647	1.17116e-06	3.73416e-06	4.57361
SNAPC5	0.0528223	-0.140937	4.86634	1.17192e-06	3.73471e-06	4.57298
COPE	0.072811	0.749748	4.86512	1.17911e-06	3.75575e-06	4.56713
RAP2A	0.0672398	0.0358042	4.86427	1.18419e-06	3.77002e-06	4.56302
TMED1	0.0462767	0.139416	4.86383	1.18678e-06	3.77639e-06	4.56092
PTPN14	0.0694847	-0.316056	4.86346	1.18904e-06	3.78168e-06	4.55911
MSH6	0.0639358	0.58535	4.86205	1.1975e-06	3.80668e-06	4.55232
SPTLC1	0.0615398	0.170433	4.86135	1.20171e-06	3.81816e-06	4.54896
SLC6A2	0.0440044	-0.725883	4.86111	1.20314e-06	3.82077e-06	4.54783
[truncated: 1,716 more rows]
