# Supplementary material for: From Cellular Infiltration Assessment to a Functional Gene Set-Based Prognostic Model for Breast Cancer
Source: Frontiers journal article supplement (doi:10.3389/fimmu.2021.751530), 2021-10-04
Supplement: Data_Sheet_1.ZIP [file Table_S1.xlsx]

## Sheet: Sheet1
Usage	Name	Tissue	Literature	Data Entry	Tech	Number of Samples Used	Sample Types	Species
Construction of BC-specific RGEP	Azizi	Breast	Azizi et al.（2018）	GSE114725	scRNA-Seq	12	Immune cells (25555 cells)	Human
Performance estimation for BC-specific RGEP	Bassez	Breast	Bassez et al. (2021)	https://lambrechtslab.sites.vib.be/en/single-cell	scRNA-Seq	40	Treatment-naive patients receiving anti-PD1 (n = 29, cells = 175942) or patients receiving neoadjuvant chemotherapy before anti-PD1 (n = 11, cells = 50693)	Human
	Chung	Breast	Chung W et al. (2017)	GSE75688	scRNA-Seq	11	Primary breast cancer cells and lymph node metastases (513 cells)	Human
Build function-based prognostic model	TCGA-BRCA	Breast		https://www.cancer.gov/about-nci/organization/ccg/research/structural-genomics/tcga	RNA-Seq	1091	Primary breast cancer	Human
1. Validation of our function-based prognostic model 2. SVM classification of high- and low-risk patients	Metabric	Breast	Christina Curtis et al. (2012)	EGAS00000000083	Microarray	1904	Primary breast cancer	Human
	NKI	Breast	Laura et al. (2002)	https://www.bioconductor.org/	Microarray	319	Breast cancer	Human
	Mainz	Breast	Schmidt M et al. (2020)		Microarray	200	Primary breast cancer	Human
	Transbig	Breast	Desmedt C et al. (2007)		Microarray	198	Primary breast cancer	Human
	UNT	Breast	Sotiriou C et a. (2006)		Microarray	125	Primary breast cancer	Human
	UPP	Breast	Miller LD et al. (2005)		Microarray	236	Primary breast cancer	Human
	Caldas	Breast	Naderi et al. (2007)	https://xenabrowser.net/datapages/	Microarray	113	Breast cancer	Human
	Chin	Breast	Chin et al. (2006)		Microarray	112	Breast cancer	Human
	Yao	Breast	Yao et al. (2010)		Microarray	682	Breast cancer	Human
Risck Score Model for Neoadjuvant chemotherapy or Immune therapy response analysis	Hatzis	Breast	Hatzis C et al.（2011）	GSE25066	Microarray	508	Breast cancer patients with neoadjuvant chemotherapy	Human
	Horak	Breast	Horak CE et al. (2013)	GSE41998	Microarray	279	Breast cancer patients with neoadjuvant chemotherapy	Human
	Korde	Breast	Korde LA et al. (2010)	GSE18728	Microarray	61	Breast cancer patients with neoadjuvant chemotherapy	Human
	Liu	Breast	Liu JC et al. (2012)	GSE37946	Microarray	50	Breast cancer patients with neoadjuvant chemotherapy	Human
	IMvigor210	Urothelial	Jean H et al. (2016)	IMvigor210CoreBiologies (R packages)	Microarray	310	Metastatic urothelial cancer patients with immune therapy	Human
	Miller	Breast	Miller WR et al. (2010)	GSE5462	Microarray	116	Breast cancer patients with neoadjuvant chemotherapy	Human
Extending functional gene set-based prognostic model to pan-cancer	TCGA			https://www.cancer.gov/about-nci/organization/ccg/research/structural-genomics/tcga	RNA-Seq	1091	32 Cancer types	Human

## Sheet: Sheet2
Name	Literature	Tissue	Tech.	Genes × Cell types	Malignant (Y/N)	Fibroblasts (Y/N)
LM22	Newman et al. (2015)	Tonsils & Lung & FL lymph nodes & peripheral blood mononuclear cell (PBMC)	Microarray	547 × 22	N	N
ABIS	Monaco et al. (2019)	PBMC	RNA-seq	1296 × 17	N	N
ImmunoStates	Vallania et al. (2018)	PBMC	Microarray	317× 20	N	N
Yu et al.	Yu et al. (2019)	Head and neck squamous cell carcinoma (HNSCC)	scRNA-seq	610 × 11	Y	Y
