# Supplementary material for: From Cellular Infiltration Assessment to a Functional Gene Set-Based Prognostic Model for Breast Cancer
Source: Frontiers journal article supplement (doi:10.3389/fimmu.2021.751530), 2021-10-04
Supplement: Data_Sheet_1.ZIP [file Table_S2.xlsx]

## Sheet: level.1_top20_positive_markers
Table S2. Top 20 differential expression genes for each cell type
Malignant cell	Fibroblasts	Proliferating T cell	Cytotoxic T cell	Treg	Naïve-like T cell	NK cell	Neutrophils	pDC	Dendritic cell	Macrophage	Monocyte	Mast cell	B cell	Transitional
AZGP1	COL1A1	TOP2A	FGFBP2	FOXP3	IL7R	XCL1	S100A9	LILRA4	CST3	APOE	FCN1	TPSB2	IGHM	CD8A
KRT19	DCN	TYMS	PRF1	TNFRSF4	CD40LG	TRDC	G0S2	IL3RA	CLEC10A	SPP1	VCAN	TPSAB1	CD79A	CD8B
TACSTD2	APOD	RRM2	GNLY	TNFRSF18	EEF1A1	XCL2	FCGR3B	TCL1A	FCER1A	C1QA	S100A9	CPA3	MS4A1	CCL5
KRT18	IGFBP7	MKI67	NKG7	CTLA4	LTB	KRT86	S100A8	TSPAN13	HLA.DQA1	C1QB	S100A8	MS4A2	IGHD	CCL4
SAA1	MGP	UBE2C	GZMB	IL2RA	TCF7	IL2RB	CSF3R	PTGDS	HLA.DRB1	C1QC	LYZ	CTSG	TNFRSF13C	TRAC
KRT7	HBB	KIFC1	ADGRG1	TIGIT	MAL	CTSW	FPR1	PLD4	HLA.DPB1	RNASE1	SERPINA1	GATA2	POU2AF1	GZMK
ERBB3	COL1A2	BIRC5	SPON2	TNFRSF9	SPOCK2	SH2D1B	CXCR2	JCHAIN	HLA.DQB1	FN1	CTSS	KIT	VPREB3	TRGC2
MGP	COL6A1	NUSAP1	MYOM2	IKZF2	CCR7	NCAM1	SLC25A37	RASD1	HLA.DRA	APOC1	LST1	SLC18A2	CD22	ZNF683
PIGR	IGFBP4	KIAA0101	GZMH	DUSP4	GPR171	KLRD1	MXD1	IRF4	HLA.DPA1	GPNMB	APOBEC3A	VWA5A	TCL1A	ITGA1
EFHD1	STC2	CENPF	KLRD1	AC133644.2	BIRC3	AREG	VNN2	TCF4	HLA.DRB5	SEPP1	FPR1	C1ORF186	CD79B	CD3D
SDC4	AQP1	FANCI	CX3CR1	IKZF4	LEF1	CD7	CXCR1	IRF7	CD1C	FTL	AIF1	HPGD	BANK1	TRBC2
AGR2	COL3A1	STMN1	KLRF1	TBC1D4	LDHB	KLRC1	IL1R2	CYB561A3	LYZ	LGMN	C5AR1	ADCYAP1	RALGPS2	XCL1
KRT15	ACKR1	PCNA	CST7	ICOS	AQP3	GNLY	NAMPT	SERPINF1	CD74	C3	LILRB2	HDC	RP5.887A10.1	CXCR6
STC2	COL6A3	H2AFX	CTSW	BATF	PIK3IP1	TNFRSF18	BASP1	CLN8	FCGR2B	CD68	MPEG1	LMO4	PAX5	XCL2
SFRP1	SPARC	TUBB	S1PR5	IL32	CCR6	DUSP2	AQP9	IRF8	MS4A6A	CTSB	HCK	IL1RL1	LINC00926	DUSP2
LTF	ADIRF	HMGB2	FCGR3A	PMAIP1	KLRB1	MATK	SLC11A1	UGCG	CPVL	HMOX1	THBS1	LIF	CD37	AC092580.4
SLC39A6	CCL21	TUBA1B	CD247	LTB	BCL11B	HSPA6	SOD2	PLAC8	HLA.DMA	MAFB	EREG	SLC45A3	IGKC	KLRC1
SCGB2A2	CXCL12	HIST1H4C	GZMA	GBP5	CD6	HSPA1B	NEAT1	MPEG1	FGL2	ACP5	CYBB	HPGDS	IGLC3	IFNG
IGFBP4	IGF2	H2AFZ	TBX21	PIM2	PBXIP1	CCL3	IFITM2	GZMB	SGK1	GRN	NAMPT	EGR1	IGLC2	ITGAE
XBP1	CTGF	IDH2	EFHD2	HSPA1A	AC090498.1	HSPA1A	CXCL8	SOX4	MRC1	CD14	IL1B	CMA1	IGHA1	CCL4L2
Note: The genes marked in red are canonical genes used to annotate cell types.
