# Supplementary material for: From Cellular Infiltration Assessment to a Functional Gene Set-Based Prognostic Model for Breast Cancer
Source: Frontiers journal article supplement (doi:10.3389/fimmu.2021.751530), 2021-10-04
Supplement: Data_Sheet_1.ZIP [file Table_S3.xlsx]

## Sheet: BC-specific RGEP
Table S3. Reference gene expression profile for breast cancer (BC-specific RGEP)
Gene symbol	Malignant cell	Fibroblasts	Proliferating T cell	Cytotoxic T cell	Treg	Naïve-like T cell	NK cell	Neutrophils	pDC	Dendritic cell	Macrophage	Monocyte	Mast cell	B cell	Transitional
A2M	0.0880271	0.73334	0.120623	0.0593447	0.0399898	0.0445101	0.0320598	0.0559361	0.231771	0.574523	1.37792	0.09502	0.0876147	0.0574197	0.0665161
ABCA5	0.106195	0.102852	0.0456849	0.0430999	0.0433149	0.0496965	0.0301679	0.0161071	0.184181	0.0140621	0.0208904	0.0199875	0.0808966	0.0355302	0.0578906
ABCB1	0	0.0777597	0	0.072332	0.0218271	0.0862405	0.171749	0	0.0180729	0.0171373	0.00858807	0	0.0203966	0.0109071	0.0980809
ABCB4	0	0.00412345	0	0	0	0	0	0	0	0.0225072	0.0160809	0.0038407	0.00454492	0.0385786	0.00140743
ABCB9	0	0.00984782	0	0.00260444	0	0.00534844	0.00554936	0	0	0.00352772	0.00835608	0.00645859	0.00542224	0.00823358	0.00277076
ABCC4	0	0.0292965	0	0.0140825	0.0173862	0.0238772	0.0197845	0	0.0245234	0.0577618	0.0569585	0.00358306	0.253477	0.00921434	0.0220506
ABHD5	0.0528081	0.0368963	0	0.0389156	0.0231383	0.023593	0.0267932	0.25884	0.0245234	0.0591674	0.0395355	0.191684	0.0181636	0.0313218	0.0216114
ABI3BP	0	0.0509653	0	0.008969	0	0.00106485	0	0	0	0.00235304	0.003379	0.00304613	0.0287375	0	0
ACAA1	0.0418649	0.205053	0.109171	0.17562	0.23859	0.11533	0.188565	0.196626	0.592669	0.409749	0.215095	0.50985	0.25124	0.119323	0.111789
ACAP1	0.361293	0.333429	0.701834	0.443223	0.507213	0.552604	0.505081	0.225736	0.350515	0.133969	0.0648686	0.0924275	0.157983	0.50595	0.57124
ACP5	0.117778	0.204186	0.551094	0.0576171	0.461601	0.134264	0.201456	0.0315994	0.402024	0.378464	1.28548	0.358041	0.233221	0.356719	0.196645
ACSL1	0.134656	0.179276	0.120158	0.0336839	0.0970208	0.037269	0.0572601	1.02686	0.143382	0.406027	0.487786	0.937211	0.0826766	0.0624723	0.0548237
ACSM3	0	0.0050701	0	0	0.0102219	0.00961796	0.00404971	0	0	0.0111352	0.00625118	0.0072192	0.0222743	0.00904135	0.00408543
ACTA2	0	0.306318	0	0.0511774	0.15382	0.0249707	0.00434656	0.0107516	0	0.0591139	0.0301607	0.0466011	0.0274846	0.00895758	0.058716
ACTN4	1.4764	1.10986	1.28205	1.20422	1.05362	0.724844	1.03656	0.713595	1.02045	0.675235	0.586755	0.893863	1.25451	0.538459	0.932028
ACTR1A	0.0757679	0.165299	0.240583	0.166992	0.167245	0.122543	0.160981	0.0457747	0.134382	0.241365	0.231499	0.294802	0.241655	0.0897963	0.136863
ACVRL1	0.0222717	0.118794	0	0.00753684	0	0.00444937	0.00442011	0.0153319	0	0.0309419	0.0535497	0.0571372	0.0157514	0.0152228	0.00171509
ADAM15	0.364323	0.252642	0.137337	0.10199	0.0546346	0.0443539	0.0338218	0.0195515	0.0977428	0.355475	0.206168	0.280714	0.042604	0.0199507	0.0356697
ADAM19	0	0.16526	0.309463	0.0321688	0.165539	0.206909	0.0508853	0.144695	0.516153	0.178415	0.0292101	0.0618251	0.0150014	0.313828	0.127739
ADAM28	0.0528081	0.0786786	0.0543466	0.0217101	0.00817093	0.00696709	0.127297	0.00442594	0.0485391	0.379291	0.218633	0.093975	0.0494012	0.613129	0.0112539
ADAM33	0	0.0545183	0	0.0036607	0	0.00204227	0	0	0	0.00208075	0	0	0.00422773	0	0
ADAMDEC1	0	0.00792016	0	0	0	0	0	0	0.0398197	0.0168043	0.0551625	0.0130016	0	0.00863826	0.000861194
ADAMTS2	0	0.0132953	0	0.00236638	0	0.00123219	0	0	0.0217469	0.00445367	0.00319652	0.00582321	0	0	0
ADAMTS3	0	0.00560182	0	0	0.00330161	0	0	0	0	0	0	0	0.0484405	0	0
ADAMTS5	0	0.0853873	0	0.0164377	0	0.00124489	0	0	0	0.00218634	0.00365381	0.00960885	0.00540538	0	0.00353997
ADAP2	0	0.119159	0.131722	0.0111019	0.0172958	0.00928465	0.00694526	0.078821	0.15166	0.321543	0.670289	0.362367	0.0149374	0.0388278	0.010706
ADCY4	0	0.135131	0	0.0142132	0.0135271	0.00651362	0.0179952	0.03633	0	0.00688489	0.00811427	0.0110237	0.00312011	0	0.00740157
ADCYAP1	0	0.0165493	0	0.00608144	0.00980683	0.0098633	0.00840775	0	0	0.00897727	0.00470687	0.0173854	0.870315	0.00945762	0.00569699
ADI1	0	0.19008	0.104343	0.108201	0.234589	0.132032	0.116577	0.0384626	0.357761	0.220859	0.192386	0.229886	0.222492	0.178705	0.0776543
ADRB2	0.0401982	0.0738095	0	0.259917	0.00914334	0.0329523	0.0983427	0.0215357	0.0649733	0.0632259	0.0700966	0.0666687	0.667582	0.0200866	0.0792494
AFAP1L1	0	0.018651	0	0	0	0.00206703	0.0209889	0	0	0.00133912	0.00412778	0.00242968	0.00575161	0	0
AFF3	0.352994	0.150295	0	0.0079133	0.00733786	0.00702656	0.0700921	0	0.207867	0.129053	0.0295175	0.018871	0.00340076	0.116091	0.00517367
AGPAT5	0.0433503	0.0280101	0	0.0178299	0.0297974	0.0329687	0.083448	0	0.299546	0.0577286	0.0561285	0.0471133	0.041734	0.0669459	0.0223549
AGTRAP	0.0834877	0.177576	0.475693	0.244928	0.168535	0.0909005	0.195322	0.347486	0.0814853	0.143353	0.162078	0.462373	0.472956	0.0381011	0.137485
AIF1	0.0509804	0.291518	0.0638201	0.0265668	0.0565831	0.0626895	0.0477087	0.882113	0.592207	1.47295	1.33381	2.11635	0.103701	0.0665267	0.071357
AIM2	0	0.0120359	0	0.00259806	0.0578596	0.0269434	0.00590733	0.039119	0	0.00365762	0.011757	0.0262904	0	0.13219	0.0081586
ALAS1	0.0561587	0.0692466	0	0.038264	0.123738	0.0325691	0.0609228	0.108548	0.159428	0.0773079	0.120655	0.0977225	0.366325	0.0317873	0.0526449
ALOX5	0.188586	0.238552	0.0983992	0.0312439	0.0325139	0.0247938	0.0507262	0.605961	0.170713	0.577153	0.496438	0.848538	1.75097	0.342337	0.0294377
ALPL	0.0743833	0.0545925	0	0.00693192	0	0.00108789	0.00786641	0.696279	0.0485391	0.0030866	0.00124693	0.00578295	0.00269694	0.0445367	0.00102206
AMOTL2	0.0291384	0.0869016	0	0.00283864	0	0.00114084	0	0	0	0	0.00132373	0	0	0	0.00135397
ANGPT2	0.0796333	0.129054	0	0.00254468	0	0	0.00465317	0	0	0	0.00275153	0.00260394	0.0392952	0	0.00401553
ANK3	0.044474	0.0438273	0	0.00926732	0.0264596	0.068736	0.0114471	0	0	0.00888412	0.0116397	0.0040377	0.0243916	0.0163645	0.0503844
ANKRD10	0.329586	0.25577	0.166964	0.14879	0.437373	0.153921	0.222944	0.0414525	0.243347	0.1908	0.215664	0.226068	0.367283	0.284086	0.153191
ANKRD55	0	0.0251748	0	0.00328957	0.00856438	0.0349975	0	0.0116521	0	0	0	0.00254047	0	0.00355402	0.00148309
ANTXR1	0.0735992	0.0724081	0	0.00318925	0	0.00184754	0	0	0.0180729	0.0149377	0.0341345	0	0	0	0.00115765
ANXA11	0.721889	0.629466	1.06502	0.472753	0.840173	0.582689	0.601661	0.942106	0.713214	0.693179	0.691159	0.791518	1.21755	0.391239	0.5902
ANXA2	1.27645	1.04024	1.68413	0.63154	0.714532	0.520749	0.353005	0.207954	1.42136	1.66106	1.72486	1.66283	0.265808	0.377358	0.647641
ANXA3	0.0463532	0.0450501	0	0	0	0	0	0.113401	0	0	0.00199191	0.00448821	0.00451497	0	0.00164232
AOX1	0	0.0288371	0	0.0030629	0	0	0	0	0	0	0.00115827	0	0	0	0
AP2M1	0.561463	0.584971	0.906396	0.45643	0.539653	0.387413	0.428924	0.276516	0.548021	0.798569	0.758331	0.808938	0.992652	0.299627	0.418283
APLNR	0	0.0287661	0	0.00616555	0	0.00109104	0.0111092	0.0123846	0	0.00344475	0.000478384	0.00444847	0.00400686	0	0.00244143
APLP2	1.3501	0.879416	0.340292	0.441317	0.443554	0.211016	0.341062	0.568384	0.532271	1.23458	1.47794	1.77908	0.552683	0.340802	0.221015
APOBEC3A	0	0.0179875	0.16431	0.00825324	0.0353686	0.0132361	0.00951855	1.01747	0.140127	0.198814	0.0804585	0.900713	0.0420232	0.0501159	0.0134052
APOBEC3C	0.328704	0.375122	1.16482	0.703986	0.727136	0.378271	0.442082	0.054045	0.494556	0.426861	0.363824	0.51256	0.400477	0.539089	0.630376
APOBEC3G	0.0906652	0.308733	1.3864	0.776593	0.473612	0.288769	0.804472	0.140891	0.250048	0.230592	0.146378	0.225742	0.10126	0.22002	0.730879
APOC1	0.0560573	0.148858	0.244696	0.0449307	0.0540393	0.0411323	0.0610169	0.0431735	0.311136	0.258224	1.4823	0.0907117	0.131786	0.0907009	0.0751599
APOE	0.124968	0.583381	0.671117	0.151137	0.279014	0.25363	0.213889	0.153781	0.81723	0.551306	2.83951	0.384011	0.248491	0.365277	0.314185
APOL3	0.152554	0.212673	0.140266	0.113634	0.183065	0.148329	0.113965	0.0224571	0.0994929	0.129902	0.0749916	0.133549	0.0190525	0.0942562	0.138773
APOL6	0.136018	0.255953	0.593185	0.41613	0.506818	0.342137	0.327358	0.0933324	0.0646419	0.325423	0.285425	0.451652	0.146956	0.0901604	0.329517
APOLD1	0.107389	0.326865	0.298185	0.0669167	0.180543	0.0955921	0.0439524	0.0119126	0.0485391	0.0534154	0.0191295	0.0501488	0.0172932	0.0599374	0.0878237
APP	1.44659	0.648675	0.0658485	0.065536	0.058739	0.114052	0.0809576	0.0622266	1.57249	0.337306	0.31908	0.375275	0.0587379	0.123354	0.044983
AQP9	0	0.0572996	0.247001	0.00261815	0.0123411	0.00991292	0.0230842	1.37256	0.124282	0.105063	0.228427	0.394781	0.0100604	0.0134796	0.00889239
ARHGAP22	0	0.0068148	0	0	0	0.00106718	0	0	0.065604	0.0811298	0.0874842	0.0375885	0	0	0.00390567
ARHGAP29	0.232035	0.135657	0	0.0115676	0.00348717	0.00221932	0	0	0	0.00107027	0.0015548	0.0189522	0.0331761	0	0.00337784
ARHGAP9	0.179578	0.206997	0.394197	0.362324	0.504373	0.287743	0.449251	0.837151	0.244521	0.277611	0.203636	0.348982	0.181882	0.26714	0.397974
ARHGEF6	0.205025	0.254516	0.435967	0.198988	0.380227	0.255697	0.233071	0.144814	0.466111	0.396794	0.235898	0.308915	1.59139	0.140846	0.177867
ARID4A	0.0408821	0.164886	0.190381	0.0830765	0.109607	0.0909381	0.127739	0.231485	0.111665	0.10823	0.107909	0.153666	0.214356	0.0893478	0.0933919
ARNT2	0.134616	0.00324655	0	0	0	0	0	0	0	0.00441434	0.0012956	0	0.00901366	0	0
ARPC1B	0.505287	1.14878	2.05967	1.34526	1.43114	1.08601	0.937652	1.35483	1.82865	2.10032	1.65049	2.27412	0.887157	1.02568	0.981802
ARPC5L	0.0738136	0.157102	0.576448	0.451157	0.362758	0.207428	0.309388	0.0423129	0.270531	0.16241	0.115426	0.161428	0.084283	0.184012	0.285036
ARRB1	0.0716912	0.0679018	0	0.0386145	0.0731452	0.0224901	0.0728061	0.0686807	0.0228076	0.16362	0.166228	0.292467	0.168867	0.0131957	0.02855
ARRDC1	0.237722	0.196934	0.357271	0.152604	0.2004	0.103875	0.150072	0.129332	0.163636	0.248589	0.148364	0.308873	0.229922	0.0982958	0.133058
ASGR1	0	0.0211946	0	0	0	0.00233134	0	0.0115233	0.0407914	0.0794867	0.0438018	0.222088	0.0101914	0.00514432	0.00231919
ASGR2	0	0	0	0	0	0.00265661	0	0	0	0.12373	0.0246288	0.235374	0	0	0.00346697
ASRGL1	0	0.0533842	0.0456849	0.00658351	0.00925644	0.00535824	0	0.0124197	0.0215327	0.0625691	0.0657876	0.0678066	0.267521	0	0.0068301
ATP2B1	0.209247	0.38192	0.275055	0.146188	0.225035	0.264916	0.140132	0.62764	0.258884	0.667671	0.44462	0.576666	0.085424	0.338882	0.195097
ATP5B	0.611991	0.430315	1.03468	0.477218	0.669314	0.417546	0.532225	0.113943	0.744457	0.851937	0.706299	0.84538	0.585445	0.387734	0.437351
ATP5E	1.0813	1.26939	2.25265	1.28528	1.98023	1.47513	1.30564	1.17516	1.81575	2.0049	1.5393	2.02575	1.21421	1.30386	1.50213
ATP6V0E1	0.531831	0.529683	0.591335	0.503692	0.677362	0.467028	0.360321	0.818819	1.20176	0.738639	0.813991	0.901872	0.658252	0.567938	0.514288
ATP6V1E1	0.428359	0.374916	0.566331	0.286208	0.459017	0.261991	0.214319	0.28173	0.26153	0.43031	0.464546	0.424587	0.431367	0.288822	0.305412
ATP8B4	0	0.0407324	0	0.0102829	0.0042139	0.00577947	0.103213	0.0279076	0	0.148051	0.108896	0.0722812	0.214039	0.00843532	0.0135835
AZU1	0	0	0	0	0	0	0	0	0	0	0.000708585	0	0	0	0.00103274
B4GALT1	0.233475	0.369228	0.378451	0.221345	0.214581	0.159981	0.339906	0.187854	0.725592	0.366066	0.388666	0.417502	0.206002	0.317692	0.194426
BACH2	0.0408821	0.123801	0	0.0277007	0.0314489	0.110768	0.122155	0	0.0648306	0.0211259	0.0149231	0	0.0025307	0.350652	0.0282438
BANF1	0.432977	0.113902	0.575122	0.236738	0.209305	0.160029	0.22149	0.018717	0.291906	0.280486	0.274071	0.263895	0.293125	0.206925	0.145952
BANK1	0	0.0327784	0	0.00233044	0.00345614	0.00193457	0.0163156	0	0.0648306	0.0552114	0.00867666	0.0205078	0	0.85079	0.00344438
BARX2	0.154332	0.0191252	0	0	0.0246421	0.00329524	0.0101881	0	0	0	0.00122096	0	0.0085563	0.0109004	0
BATF	0.130431	0.172764	0.954716	0.268965	1.12167	0.258179	0.102816	0.0380182	0.215936	0.076227	0.0775188	0.108917	0.644645	0.0600671	0.173839
BCL11A	0.166006	0.0564036	0	0	0.00739841	0.00389997	0.0118043	0	0.917321	0.0810281	0.0340483	0.0646163	0.135901	0.517943	0.00612958
BCL11B	0.176437	0.415987	0.502045	0.472862	0.666421	0.84018	0.117897	0.0600708	0.0593565	0.0721968	0.0574605	0.03571	0.0243222	0.0217737	0.671663
BCL2A1	0.0222717	0.108996	0.09649	0.0657009	0.073601	0.0869516	0.0817371	1.55572	0.101743	0.243287	0.24041	0.779402	0.241954	0.202652	0.080109
BCL7A	0	0.0224777	0	0.00344838	0.00718538	0.00194783	0.00690734	0	0.135862	0.0675598	0.0151618	0.00566122	0.0167557	0.0490114	0.00217592
BEND5	0.0291384	0.0116192	0	0.00265121	0	0.00218499	0.0183054	0	0	0.0176888	0.00319807	0	0.0142965	0.052769	0.00194003
BEX1	0	0.0109181	0	0	0	0.00282143	0	0	0	0	0.00304882	0	0.0116731	0	0.00159326
BFSP1	0	0.00765672	0	0.0406068	0	0.000941041	0.00550368	0.00803387	0	0.00250411	0	0	0	0	0
BHLHE41	0.0291384	0.0845086	0.0549096	0.00775764	0.00590436	0.00335067	0.00565979	0.00442594	0.0363459	0.0760017	0.283226	0.0086178	0.0204132	0.130407	0.0131207
BIRC3	0.635918	0.760614	1.45719	0.356718	1.994	1.37409	0.753532	0.165103	0.474013	0.683485	0.27373	0.680884	1.38993	2.04785	0.590311
BLK	0	0.00666284	0	0	0.0112653	0.00922075	0.00505888	0	0	0.00161026	0.000437205	0.00711424	0.00345938	0.53871	0.00547792
BLNK	0.0409245	0.0280492	0	0	0.00973838	0.00166387	0.00320303	0	0.292586	0.0947596	0.134019	0.0122387	0.0066402	0.342776	0.00308407
BMP2K	0.146497	0.117317	0	0.0208828	0.0469121	0.0288329	0.0374682	0.0563767	0.105833	0.296041	0.401576	0.197003	1.12282	0.18373	0.0365312
BMX	0	0.0178647	0	0	0	0	0	0.0103858	0	0	0	0	0	0	0
BPI	0	0	0	0	0	0	0	0	0	0	0	0.0141284	0.00367769	0	0
BRAF	0	0.0982724	0	0.02853	0.0304903	0.0376973	0.04966	0.0640018	0.0313912	0.0494367	0.0471612	0.0503105	0.105733	0.0799222	0.0673559
BST1	0	0.0426899	0	0.00518516	0.00589796	0.00424183	0.0224114	0.182823	0.0547433	0.0884658	0.125782	0.39166	0.075565	0.0125989	0.00992228
BST2	0.558598	0.654111	1.07963	0.529391	0.752365	0.38289	0.869464	0.121774	1.1911	0.966888	0.938739	1.01196	0.878121	0.452867	0.436841
BTNL8	0	0.00329612	0	0	0.00671029	0.00101864	0	0.151314	0	0.00307284	0.000641171	0.0083468	0	0	0
BUB3	0.294498	0.324399	1.41523	0.332582	0.545325	0.326782	0.326361	0.0744226	0.173895	0.222407	0.176016	0.209896	0.326868	0.262217	0.405139
C1QA	0	0.412462	0.191604	0.0494165	0.0372276	0.0409767	0.0448362	0.0653865	0.389119	0.690923	2.4607	0.327767	0.0570043	0.100583	0.0783086
C1QB	0.0985698	0.393815	0.274064	0.0429975	0.074931	0.0570751	0.0521996	0.0380437	0.512732	0.493144	2.26705	0.151236	0.0600835	0.0512553	0.0777686
C1QC	0	0.173121	0	0.0127678	0.0133006	0.0214374	0.0369063	0.0136837	0.373342	0.265331	1.73286	0.0420323	0.026362	0.00487635	0.0325517
C1R	0.117179	0.606142	0	0.0374639	0.00530701	0.0160282	0.0203147	0.0116764	0.187244	0.0142405	0.0119158	0.025833	0.0135531	0.0055992	0.0155418
C1S	0	0.400329	0	0.0340165	0	0.0079932	0.014896	0.0101756	0	0.0102081	0.0141956	0.0169946	0.0223177	0.00458579	0.0114343
C3	0.313401	0.742445	0	0.065431	0.0229756	0.01622	0.0374213	0.0182548	0.114793	0.232136	1.06891	0.180591	0.0579753	0.00703085	0.0473754
C3AR1	0.165625	0.182459	0.129388	0.0484298	0.160677	0.0687362	0.042561	0.210264	0.115912	0.650107	0.9719	0.766108	0.495325	0.0332258	0.072397
C5AR1	0	0.167242	0.0441259	0.0268803	0.0272633	0.0291934	0.0302425	1.7684	0.3035	0.437055	0.978535	1.70442	0.0688892	0.0568765	0.0436973
C5AR2	0.211623	0.0708169	0	0.0143803	0.00358303	0.00214785	0	0.4345	0.135467	0.0692142	0.122405	0.291246	0.0103235	0.0150226	0.00160791
CA12	0.567167	0.397736	0	0.0190794	0	0.0108417	0	0.0139991	0	0.00822375	0.0091377	0	0.00946466	0	0.00879089
CA4	0	0.0282829	0	0	0	0	0	0.0356012	0	0	0.0034432	0	0	0.00464583	0.00101743
CA8	0.0461183	0	0	0	0.00644852	0	0	0	0	0	0	0.00217207	0	0.00639211	0
CACNA2D3	0	0.00772097	0	0	0.00332733	0.00194569	0	0	0	0.169956	0.0352561	0.0759457	0.00854457	0.00373148	0.0013528
CACYBP	0.191941	0.212591	1.26449	0.182317	0.600842	0.211308	0.245814	0.0641283	0.239538	0.314226	0.244411	0.283328	0.28533	0.215601	0.221379
CALB2	0.0414096	0.0229066	0	0.00577747	0	0	0.00478446	0	0	0.00169406	0.0133818	0	0.64294	0	0.00106311
CALCRL	0	0.0800163	0	0.00600082	0	0	0.00544548	0	0	0.0202263	0.0100259	0.0128681	0.0234216	0	0.00106216
CALM3	0.427875	0.689619	2.22137	0.778654	1.17065	0.739176	0.599728	0.518337	0.453338	0.612564	0.938105	0.877037	1.09288	0.445791	0.742671
CALML4	0	0	0	0	0.00709213	0.00119945	0	0	0	0.00118415	0.00920643	0.0271711	0.00346586	0	0
CAMK4	0.173427	0.0758007	0.191399	0.0455653	0.118089	0.226608	0.0201388	0.00528446	0	0.010386	0.0117676	0.012984	0.0142805	0.0228133	0.194604
CAMP	0	0.00789903	0	0	0.00534034	0.00179486	0	0.119718	0	0.0105065	0.00115768	0.00771903	0.0207643	0.0106392	0.00151728
CAP1	1.18313	0.852241	1.62862	1.51855	1.30756	0.941101	1.04545	1.79192	1.19735	1.67037	1.47327	1.91665	1.23723	0.868139	1.10131
CASP1	0.0525112	0.108874	0.384306	0.180177	0.374282	0.158337	0.161277	0.244277	0.208753	0.593493	0.277179	0.838682	0.0401547	0.10926	0.158831
CASP5	0	0.00222095	0	0.00255451	0	0	0	0.0250301	0	0.0120699	0.00606988	0.0410724	0	0	0
CAST	0.738583	0.515335	0.282653	0.47262	0.542968	0.423674	0.370799	0.167153	0.368615	0.611951	0.51623	0.868956	0.828558	0.370757	0.342463
CBLB	0.204561	0.316332	0.411928	0.236201	0.195176	0.212027	0.332392	0.00761381	0.130307	0.0697135	0.116345	0.0510607	0.0931454	0.111132	0.367554
CCDC102B	0	0.00224508	0	0.00780885	0.00785235	0.00800695	0.0179884	0	0	0.00376059	0.0062566	0	0.0132303	0.010119	0.00371769
CCDC80	0.174073	0.569913	0	0.0470349	0.00675138	0.00673103	0.0265177	0.0125755	0.116411	0.0197379	0.0213433	0.026107	0.024393	0.0146303	0.00870672
CCL13	0	0	0	0	0	0	0	0	0	0	0.0189259	0	0	0	0.00084329
CCL14	0	0.0107965	0	0	0	0	0	0	0	0	0	0.00306044	0	0.00540145	0
CCL17	0.0700278	0.00224508	0	0	0	0	0	0	0	0.0804669	0.00624134	0.00447349	0	0	0.000981234
CCL18	0	0.0226143	0.0638201	0.00613206	0.00670606	0.0027057	0	0.0129527	0.0917105	0.0123339	0.260229	0.0166644	0.00301026	0.0244004	0.0164362
CCL19	0.0452656	0.0136541	0	0	0	0.000888499	0	0	0.0672471	0	0.00507797	0	0.0030037	0	0.00182029
CCL20	0	0.0116961	0	0.00541112	0.0797452	0.0468965	0.0105595	0.0355019	0	0.0192161	0.0191202	0.0209638	0	0	0.0225961
CCL22	0.100376	0.0129963	0.134087	0	0.270084	0.00925199	0.0103978	0	0	0.0685438	0.0750216	0.0280004	0.00924394	0.0191929	0.0155424
CCL23	0	0.0043602	0	0	0.00935434	0	0	0.0160185	0	0.00212034	0.00936071	0	0.0286449	0	0.00733954
CCL4	0.7279	1.3745	2.67049	2.82866	0.51273	0.303296	2.19139	0.300282	0.444246	0.465771	0.799347	0.416943	0.376598	0.310881	2.32385
CCL5	1.45725	2.00143	2.25298	3.32719	0.757692	1.27514	2.22486	0.193895	0.639969	0.446523	0.401706	0.346563	0.171884	0.274965	3.61299
CCL7	0	0	0	0.00250634	0.0322373	0.00380672	0.00899521	0	0.117126	0.026713	0.0178556	0.00868449	0	0	0.000810286
CCL8	0	0.00514767	0.0835055	0.00644822	0.00503815	0.00356029	0.00518299	0	0.113363	0.0671685	0.0687306	0.0146671	0.00280937	0.0215208	0.0048177
CCND2	0.0755123	0.327872	0.433273	0.530452	1.08173	0.452757	0.494908	0.0485617	0.284644	0.336474	0.137066	0.0907268	0.265232	0.220817	0.509934
CCR1	0.213692	0.156321	0.155275	0.0257049	0.184448	0.0140042	0.103428	0.242967	0.0793041	0.435598	0.576842	0.506074	0.0125737	0.0239721	0.0909649
CCR10	0	0	0	0	0.00909733	0.0110943	0	0	0	0.0057438	0.00186961	0.00304161	0.00493768	0.0110039	0.00491043
CCR2	0.109068	0.121762	0.09649	0.0188522	0.115854	0.128354	0.0185104	0.0184971	0.244644	0.286386	0.0586312	0.284452	0.0111908	0.0253795	0.143079
CCR3	0	0	0	0	0.0157216	0.00211045	0.00464466	0.0589231	0.0582414	0.00248393	0.00198859	0	0.00930172	0	0
CCR4	0	0.00317452	0	0.00505401	0.100939	0.0427815	0.00397698	0.0113851	0	0.00325181	0.0111566	0	0.00964545	0.00402028	0.0102956
CCR5	0.147415	0.184109	0.914021	0.169478	0.424043	0.148869	0.103126	0.00740551	0.265762	0.349159	0.193024	0.181076	0.0152417	0.0390137	0.458633
CCR6	0.136328	0.0903698	0.230246	0.0145261	0.223339	0.322106	0.0335227	0	0.0314133	0.146206	0.0220191	0.00449933	0.00275282	0.298983	0.0654595
CCR7	0.129943	0.299392	0.0835055	0.024123	0.155865	0.593396	0.142616	0.0397143	0.0788187	0.0389504	0.0294544	0.026944	0.0184801	0.594248	0.0909659
CCR8	0	0	0	0.00331019	0.0185971	0.00514283	0	0	0.0245234	0.00210273	0.00364982	0.00639861	0	0	0.00463731
CD14	0.102336	0.312513	0.102488	0.0620546	0.0967337	0.0566578	0.086749	0.765627	0.502278	0.927882	1.77149	1.89556	0.0842589	0.0913177	0.0650305
CD160	0	0.0153112	0.201118	0.11088	0.0211593	0.006335	0.310861	0.00724763	0	0.01088	0.010108	0.00530814	0.00611729	0	0.0835005
CD163	0.0329126	0.209102	0	0.0313813	0.0542651	0.0479249	0.0530438	0.0363837	0.398552	0.928591	1.15839	1.01975	0.0358104	0.0816085	0.0594152
CD180	0	0.0537708	0	0.00608293	0	0.00172086	0.024785	0.00442594	0.183498	0.278544	0.306288	0.21727	0.00666656	0.201743	0.0144839
CD19	0	0.0103244	0	0	0	0	0	0	0	0.00178956	0.00235502	0.00626269	0.00509683	0.313939	0
CD1A	0	0.00703421	0	0	0	0	0	0	0	0.0624356	0.00366569	0.0170136	0	0	0.00036684
CD1B	0	0.0035195	0	0	0.00332571	0	0	0	0	0.130498	0.0081685	0.00786383	0.00243327	0	0.000623343
CD1C	0.308396	0.0461581	0	0.00311083	0.00398728	0.00400312	0.0122189	0	0.0632661	1.04553	0.0403913	0.0605376	0.00370133	0.0582308	0.00148526
CD1D	0.0222717	0.0709441	0	0	0.00744018	0.00570356	0.0189765	0.0242113	0.101761	0.501642	0.0855421	0.43927	0.00275282	0.114855	0.0128037
CD1E	0.148974	0.0214654	0.09649	0.00188486	0.00519552	0.00692784	0.00430897	0	0.053436	0.586635	0.0189351	0.0140605	0.00456484	0	0.0049673
CD2	0.40158	0.856427	1.87724	1.05061	1.65711	1.31967	0.755787	0.07511	0.424409	0.272931	0.110133	0.0898831	0.0581037	0.108123	1.43055
CD209	0	0.00779097	0	0.00315967	0.00260957	0.0010365	0.00389283	0.0107709	0	0.032882	0.140024	0.00664898	0.0123824	0	0.000903786
CD22	0	0.0545296	0	0	0	0.0032694	0.0079516	0	0.0463915	0.0396702	0.0583966	0.0286001	0.523625	0.883541	0.00592852
CD244	0	0.0095759	0.11115	0.0980896	0.0038194	0.00115185	0.11008	0.0324861	0	0.0290421	0.0108461	0.0855081	0.0187096	0	0.0469589
CD247	0.224252	0.499556	0.688132	1.23477	0.917571	0.57323	0.929563	0.0588585	0.103888	0.0739109	0.0755101	0.0818239	0.0347884	0.0823597	0.727146
CD248	0	0.0972534	0	0.0113866	0	0.00705377	0.0202517	0	0.117859	0.0141161	0.00591311	0.00342599	0	0.00579459	0.0118361
CD27	0.233733	0.240663	0.771185	0.0903403	1.21735	0.45541	0.104419	0.0136559	0.069087	0.0457721	0.0316197	0.0357823	0.00301246	0.316358	0.592765
CD28	0	0.0530339	0.406887	0.0200578	0.406206	0.258448	0.0442416	0	0	0.0292958	0.058026	0.0225891	0.0112107	0.0157975	0.104412
CD300A	0.0367103	0.141084	0.0835055	0.292602	0.0170614	0.0646129	0.277299	0.414909	0.326094	0.561013	0.510688	0.586286	0.263306	0.0280999	0.0780371
CD300E	0	0.0453652	0.0459453	0.00319786	0.00477663	0.00735245	0.0191298	0.0107516	0.0919644	0.271747	0.0963071	0.949476	0.00699472	0.00416527	0.00462714
CD33	0	0.064157	0	0.00589602	0.00332571	0.00577683	0.0210743	0.00891875	0.107554	0.397654	0.208114	0.355786	0.592633	0	0.0105129
CD34	0.0375143	0.322725	0	0.0199874	0.00708384	0.00896598	0.00512319	0.0109976	0	0.0169123	0.0098717	0.00815611	0.0107678	0.00960167	0.00384953
CD37	0.481407	1.02971	0.730238	1.17037	1.11964	1.29124	1.11711	1.25775	1.32697	1.37904	1.0309	1.53894	1.40214	3.10026	1.10124
CD38	0.0222717	0.0383905	0.26417	0.07313	0.0641329	0.0117998	0.171371	0.0213574	0.11557	0.0537764	0.0283871	0.0618731	0.149365	0.0613509	0.0267409
CD3D	0	0	1.72224	1.49875	1.91767	1.52745	0	0	0	0	0	0	0	0	1.70297
CD3E	0	0	1.15995	1.28372	1.11137	1.41456	0	0	0	0	0	0	0	0	1.36863
CD3G	0	0	1.24617	1.26241	0.947306	0.973922	0	0	0	0	0	0	0	0	1.09206
CD4	0.265059	0.431762	0.173577	0.171146	1.18263	0.838267	0.0553038	0.0414712	1.66935	1.38953	1.17196	1.22792	0.215639	0.0435629	0.215868
CD40	0.0222717	0.0530919	0	0.00196162	0.0350683	0.0118052	0.0316506	0	0.0623089	0.114206	0.113471	0.112278	0.0324678	0.375107	0.0118002
CD40LG	0.0741217	0.140839	0.105808	0.0913646	0.134247	0.645044	0.0341995	0.0104349	0.0685371	0.0162321	0.0217149	0.0149913	0	0.00893771	0.122981
CD5	0.243846	0.211907	0.309846	0.365081	0.567019	0.495652	0.0147303	0.0106831	0.119612	0.0647884	0.022932	0.0352863	0.02019	0.0252887	0.27689
CD58	0.11143	0.120809	0.590991	0.0649041	0.190598	0.0781232	0.0902854	0.155182	0.0487515	0.148987	0.170586	0.183057	0.166861	0.0406044	0.102632
CD6	0.306715	0.392999	0.902274	0.686171	0.48584	0.824744	0.076044	0.0409754	0.0360761	0.0817667	0.0832748	0.0396944	0.0451633	0.0644436	0.61627
CD68	0.104608	0.321796	0.2077	0.0300629	0.0672375	0.0590241	0.101336	0.25227	1.35627	1.34746	2.35518	2.09014	0.577989	0.175731	0.0845237
CD69	0.933874	1.31389	1.20371	1.22251	1.07186	1.85296	2.3143	0.22282	0.399097	0.611916	0.318512	0.377103	2.90835	1.72259	1.92136
CD7	0.313462	0.582279	0.873149	0.816692	1.18702	0.577864	1.80581	0.0807745	0.216849	0.0983564	0.0891751	0.0802968	0.0827131	0.0828796	0.944194
CD70	0	0.015454	0.484305	0.0305499	0.195528	0.0170067	0.0139667	0	0	0.010685	0.00415997	0.00506563	0.00477762	0.0627266	0.0522249
CD72	0	0.046916	0	0.0200521	0.036717	0.0167155	0.0377048	0.0101135	0.0180729	0.233947	0.13562	0.0343187	0.0108864	0.260882	0.0188811
CD74	1.66457	3.17204	3.89282	1.87831	3.17622	1.71718	2.44332	1.43043	5.07869	5.76075	5.2075	4.67143	1.37391	5.48794	2.14141
CD79A	0	0.166308	0.0900891	0.0199722	0.136872	0.020701	0.00929627	0.0487758	0.410417	0.00807775	0.0115883	0.0253308	0.0249399	2.94443	0.00961621
CD79B	0	0.0848874	0	0.0499497	0.235656	0.0626732	0.0573532	0	0.0786924	0.0294383	0.0148354	0.0777088	0.0198963	1.04176	0.0455041
CD80	0	0.00323835	0	0	0.107701	0.00425338	0.00435788	0	0.018273	0.0468693	0.0257318	0.0202643	0.00269694	0.03633	0.00219364
CD83	0.0495002	0.233501	0	0.0440378	0.21555	0.0535981	0.162927	0.0486913	1.00759	0.830264	0.715348	0.619222	0.906262	0.839464	0.0569677
CD86	0.205932	0.0669231	0	0.0130772	0.0281321	0.00581363	0.00634716	0.060618	0.299822	0.707829	0.480243	0.656605	0.0187616	0.12036	0.0150277
CD8A	0.654174	0.726969	1.15203	1.49968	0.215359	0.280356	0.187571	0.0647131	0.273309	0.105736	0.0833402	0.068174	0.0322321	0.0572463	1.80859
CD8B	0.171372	0.27222	0.964466	0.60002	0.111943	0.123021	0.0541757	0.0324326	0.0971329	0.0451756	0.0430271	0.0273883	0	0.00741051	1.07247
CD9	1.23146	0.59905	0	0.0630247	0.0542258	0.0683509	0.184398	0.294537	0.428003	0.487967	1.30438	0.347237	1.72064	0.0527622	0.245009
CD96	0.226063	0.419804	0.426072	0.337124	0.458677	0.623899	0.685306	0.0381553	0.183582	0.0315868	0.0376047	0.0370947	0.0369334	0.121745	0.633296
CDA	0	0.0319307	0	0	0	0.00205074	0.0168534	0.761698	0	0.0127156	0.0217459	0.291112	0.00580327	0.0143114	0.00221997
CDC14B	0.0778134	0.0189756	0	0.0319257	0.0239486	0.0143011	0.00501168	0	0	0.00252547	0.0122354	0	0.0209817	0.0262124	0.0201562
CDC42EP4	0.206263	0.101124	0	0.00598655	0.00260957	0.00705895	0.00968023	0.0127374	0	0.0274571	0.0204454	0.0546277	0.0494999	0	0.00321689
CDH5	0	0.166124	0	0.00546744	0.00347516	0.0040712	0	0	0	0.00549872	0.00243822	0.0122818	0.00714744	0	0.0029926
CDHR1	0	0.0101217	0	0.00978902	0	0.00937679	0.108943	0.0242123	0	0.00215655	0	0	0	0	0.0248531
CDK2AP2	0.194923	0.310942	1.03412	0.393799	0.388825	0.257627	0.351589	0.0870522	0.566875	0.389892	0.273383	0.332831	0.370884	0.231729	0.323071
CDK6	0.0970564	0.117512	0	0.113653	0.147996	0.101918	0.133305	0.0204088	0.0886089	0.0727316	0.0834123	0.0574832	0.136175	0.0200235	0.115298
CDKN1B	0.516444	0.421511	0.245627	0.40519	0.642613	0.587773	0.501324	0.242656	0.241935	0.370547	0.182782	0.382239	0.358759	0.464835	0.562141
CDKN1C	0.275172	0.263875	0	0.0302962	0.0269937	0.0195137	0.0301805	0.0212297	0	0.0434821	0.0435418	0.460612	0.107996	0.0239703	0.0213327
CDR2L	0.0903224	0.0289686	0	0	0	0	0	0	0	0.00982217	0.0207727	0.00232423	0	0.00429285	0.000312726
CEACAM1	0.0421146	0.00349116	0.135209	0	0.0792632	0.0205969	0.018393	0.0576415	0	0.00389084	0.00768695	0	0.0507171	0.0113632	0.00343312
CEACAM3	0	0.00451578	0	0.0030416	0	0	0	0.272369	0	0.00575466	0.00151675	0.0404831	0.00315049	0	0.00074256
CECR1	0.299196	0.30497	0.372945	0.291514	0.283543	0.315914	0.284345	0.0861062	0.813073	1.29576	1.06748	1.37629	0.107465	0.262479	0.357208
CFP	0.106815	0.0499197	0	0.00286021	0.011945	0.026746	0.00656858	0.260833	0.109936	0.650284	0.0935238	0.957037	0.0170543	0	0.00261255
CHI3L1	0.134201	0.0921447	0	0.00552793	0.0306206	0.0176544	0.00816189	0.209553	0.0694968	0.0319337	0.295916	0.0277374	0.013347	0.038142	0.0138209
CHI3L2	0.0486517	0.0328901	0	0.0780333	0.00289497	0.0188423	0.0171152	0.0155028	0	0.00879714	0.0171018	0.00407865	0	0.04236	0.0343817
CHMP7	0.193329	0.171545	0.0874481	0.0868024	0.301361	0.233487	0.103239	0.018893	0.0625382	0.107953	0.0976103	0.129283	0.160671	0.348098	0.141997
CHST15	0.0929493	0.102477	0	0.00566733	0.0128361	0.00479792	0	0.576818	0.118813	0.0643021	0.130201	0.423254	0.0884202	0.0805823	0.00965472
CHST7	0	0.044287	0.0441259	0.00589098	0.131544	0.0336071	0.00549524	0.025232	0	0.0219201	0.0468135	0.0220749	0.00463677	0.0102466	0.0326977
CIB2	0	0.016911	0	0.00930131	0.00915934	0.00655861	0.0137823	0	0.168268	0.00500037	0.00431001	0	0.0170909	0.00913166	0.00963563
CIITA	0.0222717	0.0971057	0.190397	0.026026	0.0317988	0.0147982	0.0408354	0	0.52545	0.71562	0.283385	0.255317	0.0576048	0.439562	0.0335542
CKAP4	0.169557	0.0789851	0	0.0204894	0.0142732	0.0348911	0.0149576	0.560536	0.303072	0.0811393	0.142407	0.469328	0.107879	0.100714	0.0187677
CLC	0	0	0	0	0	0.00178912	0.00942591	0.125094	0	0.00641158	0.00669883	0.00622204	0.0543716	0.00441355	0.0019331
CLCC1	0.0336762	0.111433	0.260317	0.0514502	0.0546356	0.0546556	0.0268307	0.0400164	0.18364	0.0802844	0.0798887	0.0602957	0.164648	0.115745	0.0455124
CLCF1	0	0.022198	0	0.0281533	0.0257201	0.0198221	0.0118815	0	0	0.00702304	0.0106035	0.018278	0.0190599	0.0195972	0.0106096
CLDN11	0	0.0241201	0	0	0	0.00102311	0.004298	0	0	0.00770914	0.00324342	0.00364406	0.00947977	0.00585059	0.00197685
CLDN5	0.0850196	0.331756	0	0.0188822	0.0328967	0.00221795	0	0	0.0407914	0.0168716	0.0137341	0.00477868	0.0191583	0.00981987	0.00726102
CLEC10A	0	0.0900868	0.0835055	0.0138051	0.0226334	0.0100009	0.0267485	0	0.454619	1.85755	0.28699	0.447364	0.00623203	0	0.0186455
CLEC14A	0	0.203248	0	0.0151943	0	0.00554287	0	0	0	0.00561872	0.00433543	0.0119634	0.00418932	0	0.00608645
CLEC2D	0.325596	0.287502	0.479927	0.430838	0.808253	0.462912	0.305437	0.054095	0.0903952	0.146713	0.109995	0.0917273	0.108235	0.342497	0.517902
CLEC3B	0	0.00999845	0	0	0	0	0.0043021	0	0	0	0.000932256	0	0	0	0
CLEC4A	0	0.0314388	0	0.00490511	0.00577668	0.00201326	0.00330179	0.170217	0.132254	0.339572	0.142275	0.27969	0.013885	0.0250317	0.011352
CLEC4E	0	0.0321015	0	0.0023639	0.0283333	0.00796162	0.0146999	1.11398	0.0591534	0.277132	0.15159	0.696378	0.0136706	0.0168844	0.00315197
CLEC5A	0	0.0154731	0.105808	0.00838803	0.0231746	0.0172755	0.0194351	0.17357	0.0942804	0.20869	0.239489	0.217711	0.022786	0.0138872	0.0139422
CLEC7A	0.0480538	0.0984408	0.156797	0.0205869	0.0776662	0.0205019	0.0259689	0.27376	0.15994	0.717383	0.528725	0.919405	0.052662	0.0469319	0.0280016
CLIC1	0.650385	1.28487	2.48213	1.30084	1.5499	0.977338	1.32662	1.21569	1.25626	1.63073	1.44206	1.80891	1.7987	1.07775	1.18308
CLIC2	0.0774877	0.0917076	0	0.00334104	0.00532098	0.000435198	0.00688217	0	0.117382	0.312426	0.101664	0.0405637	0.0234472	0.00484842	0.00380294
CMA1	0.0420689	0.0769359	0	0.00535011	0	0.0010799	0	0	0	0.00185478	0.00047498	0.00437734	0.885349	0	0.00278881
CMC2	0.148624	0.119537	0.581975	0.0995497	0.233875	0.151965	0.138492	0.0466363	0.0821323	0.19102	0.163588	0.172049	0.22126	0.0898082	0.180466
CMTM7	0.241552	0.207077	0.205625	0.111451	0.256168	0.261015	0.0754917	0.0601834	0.337861	0.287782	0.257314	0.391503	0.10886	0.249082	0.224382
CNOT1	0.159425	0.287221	0.338678	0.281063	0.238982	0.221237	0.216571	0.118671	0.284092	0.280463	0.260527	0.231264	0.208607	0.195689	0.221088
CNRIP1	0	0.0615165	0	0.00236638	0.00362671	0.00348952	0.00758819	0	0.108663	0.00514797	0.0816097	0.00652484	0.860459	0.0100145	0.00479542
COL14A1	0	0.153101	0	0.00249129	0	0.00189972	0	0.00859788	0	0.0191317	0.00294238	0.00768266	0.0101466	0	0.00185737
COL15A1	0	0.324389	0	0.0146624	0.0156959	0.00262795	0.0171408	0.0228852	0	0.0352893	0.0226836	0.0215139	0.0286027	0.0202349	0.0056277
COL1A1	0.30803	2.94667	0	0.247594	0.030063	0.0896142	0.153845	0.0211687	0.837784	0.342556	0.226351	0.193201	0.130636	0.113356	0.0842891
COL1A2	0.157675	1.27516	0	0.0706103	0.00836638	0.0275435	0.0531595	0.023588	0.305825	0.161844	0.0868359	0.0772321	0.0458908	0.0377506	0.0320972
COL3A1	0.153491	0.898481	0.0631736	0.0594474	0	0.027818	0.0873843	0.0118509	0.114683	0.127027	0.0746799	0.0524337	0.0289819	0.0216633	0.0198219
COL4A1	0	0.21107	0	0.0083479	0.0106423	0.0052644	0.00579082	0.00875124	0	0.0137005	0.00875667	0.00462311	0.0183261	0.00494832	0.0031498
COL4A3	0	0.0122442	0	0	0	0	0.0045636	0	0	0	0.00128784	0	0.00924394	0.0468013	0.00103577
COL5A2	0	0.132341	0	0.00818368	0.00395602	0.0031551	0	0	0.10217	0.01213	0.00873572	0.00794495	0.0102373	0	0.00495546
COL6A1	0.164606	1.12421	0.0899682	0.0467707	0.0250509	0.0330011	0.0345521	0.0113445	0.221921	0.0701092	0.143336	0.0215892	0.0514393	0.0224884	0.0311624
COL6A2	0.12556	0.346858	0.0809527	0.260846	0.00962366	0.0333519	0.0343344	0	0.0964089	0.0598569	0.0830315	0.0275115	0.0284275	0.0143835	0.04537
COL6A3	0.0414096	0.766481	0	0.033693	0.0382854	0.021586	0.0228228	0.0122925	0	0.0339714	0.0216536	0.0108502	0.0150385	0.00900257	0.0164688
COL8A2	0.0291384	0.0254745	0	0.00416362	0.00394627	0.000910069	0.0136261	0	0.0408804	0.0767469	0.0898225	0.0488471	0.00828984	0	0.00376544
COLQ	0	0.0124401	0	0.00867689	0.00410697	0.0155368	0.0386714	0.00724763	0	0.00677083	0.00413138	0.0115837	0.00345391	0	0.0138509
COX17	0.166843	0.127832	0.399253	0.207474	0.340441	0.150363	0.112311	0.0881231	0.259819	0.252886	0.216746	0.229173	0.33646	0.18908	0.163847
COX5A	0.415883	0.448302	1.36797	0.378875	0.822104	0.273561	0.350623	0.0721294	0.522342	0.75113	0.517128	0.677506	0.311298	0.263542	0.299728
COX6B1	0.362758	0.501545	1.41607	0.568211	0.789726	0.548363	0.532871	0.337344	0.942773	0.885561	0.709137	0.974747	0.569195	0.493819	0.591908
COX7A2L	0.609052	0.32308	0.585217	0.300268	0.368215	0.281104	0.328721	0.0895521	0.463251	0.473869	0.291244	0.451075	0.294781	0.295764	0.311231
CP	0.184119	0.0113939	0	0	0	0	0	0	0	0.00150102	0.00164589	0	0	0.00568767	0.00175547
CPA3	0	0.456672	0.109119	0.0508387	0.0265129	0.0458213	0.0688929	0.0770267	0.166804	0.0813806	0.0600641	0.0711252	4.5985	0.0664073	0.02659
CPE	0.0897598	0.290187	0	0.014705	0.0178143	0.00120553	0	0	0	0.0137978	0.0039323	0.00893536	0.00847459	0.00464583	0.0059809
CPVL	0.114408	0.169142	0.105147	0.0206613	0.0433643	0.0228749	0.0667319	0.04955	0.285132	1.48351	0.754537	1.23209	0.0313146	0.0361618	0.0347592
CPXM1	0	0.0653563	0	0.00869232	0	0	0.00494326	0	0.0407089	0.0111197	0.00400133	0.00935264	0.0145928	0	0.003817
CR2	0	0	0	0	0.005686	0	0	0	0	0	0	0	0.00490893	0.134245	0.000901808
CRADD	0.0885335	0.0214009	0.105808	0.0362605	0.163893	0.0281507	0.0408648	0.0200997	0	0.0214172	0.0267203	0.0352625	0.0137753	0.0102615	0.0327067
CREB5	0	0.0435993	0.0441259	0.00244686	0.0127166	0.00533613	0.00438507	0.3986	0.128621	0.240425	0.112301	0.269969	0.0588521	0.01008	0.00502056
CRIP1	0.173722	0.101387	1.13979	0.281448	0.32152	0.304025	0.258538	0.00528446	0.290517	0.223569	0.140552	0.198611	0.113531	0.191247	0.330122
CRISPLD2	0	0.207432	0	0.00643516	0	0.00663896	0.00586187	0.223717	0.0397503	0.0295577	0.0149739	0.153096	0.16577	0.00952732	0.00660825
CRLF2	0	0	0	0	0.0137645	0.00131841	0.00592691	0	0	0.00189025	0.00206406	0.00809196	0.132312	0	0
CRTAM	0	0.0681474	0.301198	0.110041	0.0141137	0.013646	0.308846	0.0334141	0.0397503	0.0581954	0.0348783	0.0451218	0	0.0143773	0.276556
CRYBB1	0	0.00575132	0	0	0	0	0	0	0	0.00582872	0.0300801	0.00547667	0.0232345	0.00378749	0.000639509
CSF1	0.093275	0.299177	0.227982	0.0444782	0.373521	0.119412	0.0906828	0.112397	0.0614175	0.0483047	0.0945389	0.0412158	1.44044	0.0365869	0.166452
CSF1R	0	0.314847	0.189313	0.0271964	0.048282	0.0394428	0.061072	0.11585	0.202045	1.31641	1.53629	1.38749	0.0396511	0.0737316	0.0407981
CSF2	0	0	0	0.00229013	0.00287853	0.0112453	0.141336	0.00803387	0	0	0	0	0	0	0.0110825
CSF2RB	0.0329126	0.0937386	0	0	0.0768644	0.0132113	0.0378764	0.835529	0.788994	0.252284	0.162707	0.261414	1.15661	0.0753235	0.0105439
CSF3R	0.136367	0.11827	0	0.0262931	0.0234694	0.020157	0.0325103	2.86443	0.134387	0.406493	0.402177	0.877094	0.0322316	0.0233378	0.018057
CST7	0.213485	0.63312	1.3543	2.05999	0.717463	0.369792	1.17277	0.499277	0.181842	0.380705	0.0890066	0.0999585	0.480013	0.123713	1.03753
CSTA	0.0721123	0.0577524	0	0.0111026	0.00330161	0.00512136	0.00961229	0.22941	0.106083	0.485787	0.210306	0.855999	0.0101115	0.00868235	0.0126053
CTGF	0.205122	0.677475	0	0.0517999	0	0.0186282	0.0303521	0	0	0.029333	0.0270811	0.0295903	0.0438783	0	0.0131409
CTLA4	0.0375143	0.0422159	0.716583	0.102003	1.32145	0.212016	0.0391378	0.02064	0	0.121135	0.0332997	0.041298	0.021973	0.0599639	0.122399
CTNNB1	0.443528	0.337777	0.500795	0.232035	0.395084	0.206116	0.415968	0.160706	0.382711	0.649397	0.613437	0.886549	0.499323	0.30093	0.221127
CTSA	0.292678	0.52466	0.570158	0.234861	0.483604	0.434296	0.520336	0.166195	0.589711	0.597553	1.04328	0.969825	0.162303	0.308602	0.556492
CTSC	0.112044	0.503144	1.50257	0.9964	1.01132	0.333256	0.407907	0.171003	1.65313	0.846318	1.26874	0.905944	0.372469	0.144476	0.535137
CTSG	0.0619724	0.176801	0.0835055	0.0216221	0.0396209	0.0043006	0.0107465	0.0248748	0	0.0162302	0.0120576	0.0211333	2.08427	0.0281998	0.00849473
CTSW	0.119407	0.402387	0.241418	1.3227	0.0613857	0.131725	1.48537	0.0340367	0.107387	0.0500773	0.0484484	0.0301492	0.11888	0.0139176	0.418401
CXCL10	0	0.0157054	0	0	0.0389766	0.0137489	0.0384859	0	0.0288101	0.163632	0.0858061	0.13296	0.00414717	0.040723	0.0193153
CXCL11	0	0.00236728	0	0	0	0.00315187	0.00432835	0	0.0402403	0.0390495	0.0133628	0.0180926	0	0.0054946	0.00247636
CXCL12	0.0808935	0.775634	0	0.0384654	0.00879582	0.0141671	0.00465317	0.0129061	0	0.0347241	0.146455	0.012929	0.0209304	0.0167269	0.0178237
CXCL13	0	0	0.576074	0.00215823	0.231374	0.0333375	0.0223305	0.0117652	0.0672641	0.0245579	0.010928	0.0151174	0	0.00875591	0.0349268
CXCL14	0.0782985	0.478116	0	0.01438	0	0.00729452	0.00981958	0.0115943	0	0.0094199	0.0170387	0.0157593	0.0232327	0.0110392	0.00834465
CXCL16	0.115991	0.212586	0.218292	0.0227466	0.0759843	0.0574865	0.0556376	0.612359	0.519557	1.31283	1.35223	1.06084	0.8315	0.117175	0.0813572
CXCL3	0.0532737	0.0392244	0.0737802	0.00321675	0.0117302	0.00681283	0.0130449	0	0	0.149161	0.219584	0.119748	0.11041	0	0.00791642
CXCL5	0	0.00397784	0	0	0	0.00232936	0.00457007	0	0.096493	0.00407851	0.00970834	0.00892557	0.00451497	0	0.000574863
CXCL9	0	0.0091612	0.0433223	0	0.00442107	0.00187132	0	0	0.105425	0.0498443	0.0345497	0.0105717	0	0.00426648	0.00531914
CXCR1	0	0.00946792	0	0.0699878	0	0.00292423	0.0180923	1.20608	0	0.00599519	0.00325833	0.00532799	0.0101713	0.0062453	0.00504492
CXCR2	0	0.0542206	0	0.112405	0.00601314	0.00430946	0.0201869	2.06659	0.061283	0.026454	0.018016	0.033891	0.00946272	0.0108393	0.00270504
CXCR3	0.0291384	0.151059	0.776152	0.095585	0.526116	0.204447	0.19358	0.0119022	1.33326	0.0519492	0.0277847	0.0253777	0.0153828	0.0667426	0.377264
CXCR5	0	0.0151976	0.0543466	0.00271818	0.0362279	0.0238195	0	0	0	0.0115659	0.00316586	0.00177346	0	0.307834	0.00962069
CXCR6	0.165791	0.138657	0.818455	0.0361885	0.418604	0.163567	0.161813	0.00731774	0	0.0206603	0.0241258	0.0161237	0	0.0292485	0.455484
CYBRD1	0.189112	0.30095	0	0.0250705	0.0321197	0.00723132	0.0201234	0.0493363	0.0288101	0.148922	0.207968	0.172286	0.0116806	0.0102066	0.00837544
CYCS	0.334879	0.244479	0.823332	0.345052	0.549445	0.359225	0.45272	0.121409	0.52527	0.536806	0.41389	0.614319	0.407282	0.486837	0.384243
CYP1B1	0	0.16559	0.0630524	0.0124485	0	0.0100967	0.00563532	0.00985097	0	0.0260535	0.117046	0.262707	0.00295337	0.00909506	0.0066717
CYP27A1	0.0987946	0.120529	0.056803	0.00800551	0.005686	0.0111424	0.0102957	0.0533727	0.0852358	0.0704361	0.429966	0.157433	0.0181312	0.0422277	0.0166141
CYP27B1	0.0417415	0.00477225	0	0	0	0.00129098	0	0	0	0.00142476	0.00543961	0.00359108	0	0	0.000965177
CYP4F3	0	0.0078836	0	0.00323748	0	0.00329258	0.00467376	0.956997	0	0.00946041	0.00460594	0.00869339	0.00887388	0	0
CYSLTR1	0	0.0600915	0	0.0031864	0.0648237	0.0633212	0.068642	0.0522893	0.214153	0.101963	0.0544011	0.0867608	0.151669	0.106515	0.0133265
DACH1	0.13583	0.0693647	0	0	0	0.00464746	0.00859304	0.0318979	0.0915865	0.0218203	0.00259889	0.00225065	0.144028	0	0.000700201
DAPK2	0.0631583	0.0650695	0	0.0363251	0.0130547	0.0217138	0.0596432	0.253217	0.225313	0.0176273	0.0128778	0.00396475	0.0670838	0.0296158	0.121108
DCN	0.255769	2.15973	0	0.175332	0.00707971	0.0618625	0.0350649	0.0435073	0.197293	0.100866	0.107463	0.0734486	0.102223	0.0610865	0.063305
DCSTAMP	0	0.00580114	0	0	0	0.00150564	0	0	0.0217469	0.00105363	0.0156965	0	0	0	0
DDB2	0	0.123411	0.748397	0.0676193	0.164691	0.0967651	0.0680421	0.0120575	0.0910947	0.0644888	0.0891375	0.0953892	0.133786	0.0714748	0.0925734
DEFB1	0.109273	0.00327228	0	0.00192771	0.00835437	0.00464291	0.0234674	0	0.111423	0.0383516	0.0251926	0.0492441	0	0.0172902	0.00444386
DENND3	0.0414096	0.064309	0.199655	0.0867608	0.00579139	0.0439215	0.13278	0.741172	0.0886962	0.19866	0.173203	0.307771	0.0780502	0.226733	0.0462076
DENND5B	0	0.0510154	0	0	0	0.00106443	0	0	0.104384	0.0150031	0.018436	0.00474121	0.0327454	0.163752	0.000861309
DEPDC5	0	0.014985	0.16091	0.0236371	0.0076213	0.0225326	0.0267439	0.0165326	0.0468829	0.0161452	0.0166223	0.0307825	0.126345	0.0602223	0.0303229
DGKA	0.0420689	0.207928	0.34734	0.111662	0.418021	0.444394	0.0993894	0.0453367	0.106266	0.152015	0.0781401	0.109517	0.0648239	0.182196	0.244437
DGUOK	0.207651	0.250393	0.329831	0.264922	0.308601	0.184679	0.143454	0.067043	0.160139	0.193445	0.15826	0.218833	0.26172	0.142008	0.217415
DHRS11	0	0.0202724	0.09649	0.00316944	0.0133254	0.00900294	0.00992292	0	0	0.0124092	0.0263604	0.0175418	0.0157272	0.0100684	0.00389005
DHX58	0.0222717	0.0195706	0.249491	0.0137902	0.0296185	0.0301899	0.036474	0.0498112	0.0228076	0.0805362	0.0597544	0.0693372	0.0129327	0.0586404	0.0410047
DOCK9	0.14998	0.148022	0	0.0572325	0.0713542	0.107438	0.0401378	0.011856	0.0894044	0.0196685	0.00669175	0.0104127	0.0182432	0.021926	0.0984277
DPEP2	0.0336762	0.0304938	0	0.0329528	0.0157037	0.0431524	0.0253609	0.335815	0.0604564	0.101172	0.109015	0.18587	0.0359722	0.0423708	0.0293699
DPP4	0	0.0876022	0.0899682	0.0308832	0.0224873	0.188222	0.0624933	0.0104349	0.0721825	0.0176108	0.0304863	0.00239614	0.0592743	0.0142253	0.0911978
DPT	0.0368889	0.0628203	0	0.00598073	0	0.00208036	0	0	0.0588011	0.00769481	0.0038048	0.0117973	0	0	0.000839432
DPYD	0.0222717	0.0739482	0.228482	0.0564665	0.0744068	0.0564126	0.0630419	0.040797	0.0639681	0.334954	0.168322	0.33132	0.0942693	0.00720309	0.0603885
DPYSL2	0.149022	0.413328	0.185401	0.0859725	0.263214	0.0827895	0.131492	0.0674694	0.997923	0.838086	0.610367	0.646853	0.27013	0.0664034	0.0900221
DSC1	0	0	0	0	0	0.00488985	0	0	0	0.00479226	0.00294943	0.00696106	0.0149542	0	0
DUSP16	0.0333977	0.138105	0.179995	0.0403819	0.711263	0.24251	0.0996508	0.0230021	0.0283781	0.0405389	0.0579816	0.0246752	0.0470946	0.0089214	0.120296
DUSP2	0.433642	0.814038	1.54694	1.12345	0.855243	0.733702	1.98423	0.195572	0.76215	0.817163	0.352856	0.688983	0.849295	0.518854	1.45121
DUSP4	0.465599	0.165651	0.984253	0.0558384	1.51107	0.168355	0.374423	0.0321084	0.165375	0.201557	0.0896316	0.156272	0.0758298	0.10879	0.400242
DYSF	0	0.0653088	0	0.0361615	0.00339314	0.00211955	0.0208948	0.518579	0.159377	0.012375	0.0894499	0.156888	0.00758098	0	0.00732716
EAF2	0	0.0189596	0.0441259	0.00658304	0.00371097	0.00794247	0	0.0476012	0.0206506	0.0768311	0.0410029	0.0732777	0.05275	0.146064	0.00705194
EBF1	0	0.145703	0	0.00801581	0	0.00234664	0.00575145	0	0	0.00767189	0.00627247	0.0152766	0.00422773	0.291446	0.00644041
EBI3	0.0399733	0.0104501	0.0835055	0.00176849	0.200014	0.00206371	0.00531682	0	0.0583131	0.0508648	0.113796	0.0104041	0.00949542	0.00954603	0.00162321
ECE1	0.234227	0.324142	0.0441259	0.106128	0.169827	0.10029	0.122352	0.418666	0.12531	0.0487586	0.0301476	0.143308	0.063645	0.147406	0.0952509
ECSCR	0	0.249021	0	0.0134981	0.0158019	0.0146185	0	0	0.0407914	0.00219986	0.00124693	0.0100491	0.00809191	0.00455081	0.00718016
EDN1	0.0760745	0.196947	0	0.00706708	0	0.00476114	0.00457982	0.113854	0.0340979	0.00612987	0.00396798	0.00672722	0.00886241	0	0.0038072
EDNRB	0	0.094577	0	0.00323152	0.00716812	0.00132446	0	0	0	0.0119201	0.0377666	0.0204327	0.136805	0	0.000938672
EFNA1	0.246906	0.142474	0	0.00828875	0	0.00752447	0.0103777	0	0.0407914	0.00577646	0.00240528	0.0127735	0.00295337	0.0038036	0.00204083
EFNA5	0.200452	0.037243	0	0.0235006	0	0.00230214	0.0189082	0.026184	0	0.00258252	0.0029917	0	0.00330156	0	0.00399371
EGFL7	0	0.208166	0	0.0094932	0	0.00331127	0.0103653	0	0.0841223	0.00696654	0.0910104	0.0123508	0.0815386	0	0.0038863
EGR2	0.0528081	0.131745	0.1824	0.109389	0.0146082	0.0310117	0.190516	0.0242372	0.0724257	0.388697	0.242147	0.156522	0.18218	0.0799363	0.121597
EID1	0.502974	0.707999	0.64108	0.465772	0.554204	0.447792	0.352517	0.0779961	0.520083	0.616308	0.387522	0.532013	0.631152	0.348397	0.438036
EIF1	2.19069	2.28823	2.19763	2.47225	2.38167	2.42363	2.15382	1.70834	2.67385	2.6113	2.08579	2.75041	2.50842	2.31784	2.42105
EIF4A1	0.787533	0.827686	0.629906	0.434094	0.297212	0.300994	0.306471	0.137835	0.944059	0.74074	0.717983	0.844261	0.727908	0.391584	0.324253
ELK3	0.0458078	0.364738	0.146558	0.133941	0.316742	0.317746	0.147511	0.0563489	0.205785	0.21419	0.139058	0.166507	0.150598	0.172878	0.126342
ELN	0.0420689	0.18521	0	0.00814068	0.00466234	0.00451242	0.0038855	0	0	0.00647758	0.00791196	0.00322434	0	0.00965277	0.0030962
EMCN	0.0375143	0.228491	0	0.00535555	0	0.00515723	0.00489717	0	0.0407914	0.0114258	0.00606415	0.00590578	0.00358918	0.00488847	0.00257472
EMILIN2	0	0.181943	0	0.0468947	0.0751568	0.0444862	0.0543183	0.139322	0.255761	0.495108	0.525477	0.888384	0.563983	0.0434101	0.0534441
EMP3	0.222587	0.298208	0.559014	0.689935	0.433198	0.370881	0.254929	0.135024	0.580435	0.699351	0.534788	0.828435	0.57361	0.207412	0.338957
ENG	0.0636813	0.353116	0.105808	0.0544084	0.0617333	0.0620223	0.128246	0.0607978	0.312128	0.347899	0.646795	0.400548	0.0848922	0.0185434	0.0637199
ENO1	1.04976	0.786349	1.99687	0.904842	1.3328	0.893783	0.863584	0.7446	0.923437	1.51275	1.29013	1.55588	0.980085	0.527779	0.782173
EPB41	0.335786	0.238662	0.21553	0.296694	0.377135	0.314159	0.234177	0.247909	0.0924423	0.174563	0.104782	0.184126	0.0937599	0.234763	0.276247
EPHA1	0.0368889	0.0728988	0	0.0088963	0.0318471	0.051577	0.0442904	0	0	0.00338707	0.0025849	0.00276408	0	0.00451336	0.126494
EPN2	0.0498407	0.0643934	0	0.0314495	0.0186823	0.0162619	0.00973945	0.0132586	0	0.00240853	0.0124235	0.0154266	0.0721871	0.02394	0.0133358
EPS15	0.147545	0.234116	0.355617	0.288542	0.406858	0.226932	0.203946	0.0927933	0.168083	0.231619	0.270657	0.298544	0.357232	0.267824	0.266556
ERG	0	0.122663	0	0.00561721	0.00919604	0.00205846	0.0102309	0	0	0.00336264	0.00516254	0.00209829	0.244358	0.00920203	0.00197772
ERI1	0.099753	0.0182556	0.329889	0.0386435	0.0936025	0.025842	0.0292547	0.071735	0	0.0789046	0.0451365	0.0417618	0.0716052	0.0459125	0.0389386
ESAM	0.0417415	0.154939	0	0.0112899	0	0.00495004	0	0	0	0.00793068	0.00664788	0.00577834	0.00812233	0.014385	0.00298389
ESPL1	0	0.00227212	0.0686282	0.00298961	0.00816633	0.00107467	0.0168925	0	0	0	0.00678107	0	0.00552739	0	0.00145268
ETS1	1.0706	1.42981	2.15975	1.83744	1.88912	2.05982	1.64652	0.17661	0.526494	0.171359	0.182384	0.156329	0.162165	1.07226	1.78458
ETV3	0.0433503	0.0990841	0.120184	0.0908193	0.0229198	0.065522	0.108006	0.00891875	0.214841	0.156662	0.0464092	0.0751136	0.0894853	0.0609549	0.0610447
EVL	1.22567	1.45342	1.47776	1.2067	1.11101	1.21134	1.28589	0.190869	0.337378	0.507706	0.57954	0.47514	0.255883	0.666517	1.37445
EXOSC7	0.143671	0.0606949	0.09649	0.0331273	0.0482148	0.0576631	0.044302	0	0	0.0759619	0.0544204	0.0804584	0.0603973	0.0581797	0.0526284
F13A1	0	0.0925263	0.0549096	0	0.0119243	0.0114728	0.00473354	0	0.0774422	0.681134	0.393862	0.374311	0.0314648	0.0089441	0.0105207
F2RL3	0	0.0176278	0	0.00309374	0	0	0	0	0	0	0.0021303	0.013549	0.0164799	0	0.000861309
F3	0.156341	0.0460369	0	0	0	0.00105694	0	0	0	0.00235304	0.00435642	0.00964994	0.00456962	0.00445179	0
F8	0	0.0807615	0	0.0284859	0.00901764	0.0134828	0.00488339	0.0115658	0.018273	0.017291	0.0278334	0.0140017	0.0265606	0.0157044	0.0263303
FABP4	0.134051	0.965119	0.124974	0.0757105	0.0298216	0.0358439	0.063926	0.00891875	0.314438	0.135985	0.500243	0.103234	0.0792395	0.0781749	0.0603092
FAM110A	0.0333977	0.0270718	0.129088	0.0437899	0.227248	0.0317161	0.0581201	0.0419768	0	0.0594988	0.0487163	0.200033	0.28537	0.0207211	0.0336696
FAM124B	0	0.00213081	0	0	0.0270171	0.00412954	0	0	0	0.00236176	0.0010947	0.00772108	0.065212	0	0
FAM129C	0	0.0179171	0	0.00296169	0.00688652	0.00180936	0.00864675	0	0.766809	0.0062406	0.00410518	0.0178895	0.0022332	0.508178	0.00269183
FAM174B	0.0834786	0.0238673	0	0.00564329	0.0736874	0.0107808	0	0.00859788	0	0.0191589	0.0205249	0.00977011	0.0711066	0.0196527	0.00649509
FAM198B	0.0635409	0.112091	0	0.0127269	0.0143879	0.00564097	0.00595375	0.00442594	0.0645662	0.219608	0.203172	0.273009	0.0138467	0.0093703	0.0105848
FAM212B	0.0483502	0.0151277	0	0	0.00515815	0.00374268	0	0.357576	0	0.00646998	0.0266688	0.0476639	0.0360102	0	0.0055137
FAM65B	0.127474	0.353204	0.209612	0.729684	0.311628	0.504565	0.50511	1.96441	0.407745	0.289728	0.0643008	0.816932	0.174936	0.867129	0.271007
FAP	0	0.033272	0	0.00265121	0	0	0.00446957	0	0	0.0021604	0.000469072	0	0	0	0
FARS2	0.125667	0.0451699	0.112641	0.021097	0.0934261	0.0405988	0.0446083	0	0.0503428	0.0502984	0.0383942	0.0473324	0.114497	0.0625882	0.048034
FASLG	0	0.048814	0.266526	0.12029	0.0304969	0.0174324	0.164448	0.00803387	0	0.00219	0.0111155	0.00191775	0.0220092	0	0.170731
FBLN1	0.0414096	0.599486	0	0.0479575	0.00296042	0.00371047	0.00589673	0.00740551	0.0422105	0.0177753	0.0209328	0.00822718	0.0170801	0.0054946	0.0127131
FBLN5	0	0.144522	0	0.0158817	0.0239472	0.0683455	0.0190092	0	0	0.0129205	0.0229986	0.0135858	0.0086649	0.00563343	0.0442934
FBN1	0.0414096	0.247673	0	0.00499808	0	0.00706525	0.00795667	0	0.0487416	0.0227351	0.0017153	0.0165776	0.0039105	0.00464583	0.0014229
FBXL8	0	0.00459861	0	0	0.013549	0.00661354	0.00227142	0	0	0.00657049	0.00444302	0.00439306	0.0101687	0.00456239	0.00400815
FBXW5	0.270109	0.113707	0.331349	0.333674	0.154959	0.166462	0.165052	0.0806215	0.254618	0.219667	0.154699	0.181557	0.112436	0.0936244	0.177326
FCER1A	0.347082	0.0859538	0	0.0126372	0	0.0128137	0.0148216	0.0868463	0.121177	1.61532	0.128918	0.0899756	0.469779	0.00820186	0.0121023
FCER1G	0.0486517	0.335621	0.103165	0.2158	0.0848237	0.0503833	0.841842	0.907366	1.38176	1.60143	1.64626	1.9832	1.32138	0.0952492	0.0687459
FCER2	0	0.0179511	0	0	0	0	0	0	0	0.00968794	0.0169215	0.0318031	0.00314404	0.341812	0.000834366
FCGR1A	0	0.0395575	0	0.00904305	0.0090215	0.00752559	0.0167922	0.102502	0.0863063	0.30497	0.373367	0.323407	0.00243327	0.0123114	0.00858539
FCGR1B	0	0.0337563	0	0.0030629	0.0033679	0.000435198	0	0.0882165	0.0822716	0.185364	0.206926	0.182234	0	0.00496947	0.00468973
FCGR2A	0.0705341	0.171774	0.110365	0.0419334	0.066843	0.0267127	0.0474611	1.49267	0.236356	1.36329	1.24992	1.33836	0.252646	0.0888159	0.0394534
FCGR2B	0	0.150487	0.107299	0.0249502	0.0377311	0.0274779	0.0278915	0.156109	0.291309	1.41618	0.56615	0.270394	0.0628781	0.334447	0.0353394
FCGR3A	0.0497324	0.482344	0.271626	1.27501	0.134269	0.0671388	0.191959	1.69173	0.433531	0.492347	1.39544	1.44197	0.0807633	0.0718276	0.0986289
FCGR3B	0	0.0378347	0	0.0179816	0.00558919	0.012305	0.00481428	3.01856	0.0353513	0.0315797	0.0364786	0.0719215	0.0207027	0.00408248	0.00805338
FCHO1	0.0291384	0.0407754	0.214767	0.0445258	0.0781966	0.0585056	0.0705378	0.132984	0.132762	0.122805	0.0532447	0.0942788	0.0870533	0.0705474	0.053664
FCN1	0	0.203736	0.0549096	0.0222978	0.099526	0.0292016	0.0690272	0.416675	0.378755	1.0678	0.363121	2.93032	0.0294473	0.089314	0.0306061
FCRL1	0	0.0198371	0	0	0	0	0.00330041	0	0	0	0	0.0021546	0.00668173	0.22493	0.00185151
FCRL2	0	0.00794328	0	0	0	0	0	0	0.0648306	0.00217107	0	0.00218004	0	0.149565	0
FCRL3	0	0.0181375	0.09649	0.0694417	0.109096	0.0184766	0.0498571	0	0.048778	0.0108376	0.00198801	0.00505445	0.00857525	0.222005	0.0274008
FCRL5	0	0	0	0.00264869	0.00789539	0.00191979	0	0.0115658	0.0387184	0.00119313	0.00205378	0.00507578	0.0205081	0.149286	0
FCRLA	0	0.0197421	0	0.0027254	0.01086	0.00199602	0.00171433	0.0202508	0.109098	0.01058	0.00327261	0.00292904	0.00930663	0.619989	0.00084329
FES	0.0427445	0.0605979	0	0.0181849	0.0110326	0.0038871	0.0748412	0.177845	0.0853458	0.3086	0.133164	0.383768	0.223874	0.0287569	0.0057598
FFAR2	0	0.0351367	0	0.00264953	0.00593519	0.000945531	0	0.911811	0	0.0209376	0.0219533	0.159219	0.0151384	0	0.000749686
FGF7	0	0.0552929	0	0.00331983	0	0.00201791	0	0	0	0	0.00333646	0.00213348	0	0	0.00074256
FGFR3	0.0464793	0.0260658	0	0.00343571	0	0.00319064	0	0	0.0582414	0.00130174	0.00112597	0	0	0	0
FGL2	0	0.339558	0.202298	0.415099	0.205133	0.113012	0.0799484	0.548305	0.346351	1.85927	0.975157	1.84045	0.323327	0.119036	0.100762
FGR	0	0.198972	0.0619289	0.380014	0.0288677	0.0217951	0.378876	0.898799	0.34514	0.656912	0.460794	1.35583	0.0962229	0.10209	0.0511349
FHL2	0.124351	0.150986	0	0.0135446	0.00289497	0.00408118	0	0	0	0.0074499	0.0040872	0.00670652	0	0	0.00622357
FKBP11	0.0705651	0.140117	0	0.185546	0.0548938	0.152932	0.133738	0.039742	0	0.0655578	0.0348603	0.0489681	0.0385902	0.0616569	0.137581
FKBP1A	0.373295	0.57952	1.21148	0.257605	0.667027	0.334722	0.325752	0.663387	0.631004	0.885392	0.76417	1.24886	0.572455	0.21541	0.329286
FLT3LG	0	0.0416877	0.0658485	0.111718	0.191167	0.241982	0.107088	0.00768806	0.0180729	0.0228016	0.0154459	0.0241881	0.0288799	0.0182357	0.137995
FLT4	0.0427445	0.134372	0	0	0.014328	0.0105931	0.0114696	0	0.0548061	0.00150617	0.00135106	0.00269798	0.0112936	0.00487233	0.00680773
FLVCR2	0	0.022371	0	0	0.0205653	0.0103221	0.0116841	0.0299278	0.020633	0.16578	0.129869	0.14431	0.0221296	0	0.00896264
FMO5	0	0.0120597	0	0.00980751	0.00760119	0.00196673	0.0102673	0	0	0.0092776	0.0121056	0.0283446	0.0564562	0.0249538	0.00148725
FOSB	1.18226	1.36866	0.883095	0.539347	0.69401	1.15215	1.49474	0.639413	1.33416	1.68712	1.21617	1.73627	3.35619	1.22318	1.17867
FOXP3	0	0.0269202	0.235847	0.00210994	1.34552	0.0196877	0.0109771	0	0	0.0120445	0.00613431	0.00259465	0.0027281	0.00918702	0.00906872
FPR1	0.0636813	0.119138	0.142435	0.00901708	0.0124762	0.0095423	0.0267435	3.093	0.318901	0.714621	0.469107	1.67157	0.0493279	0.02126	0.0159262
FPR2	0	0.0118411	0	0.00304408	0.0145794	0.00404367	0.0101704	0.657124	0.0180729	0.052881	0.045238	0.471903	0.019657	0.0185634	0.00115833
FPR3	0.111835	0.0986734	0	0.0190627	0.035172	0.0148333	0.0216237	0.00664673	0.23889	0.946323	0.784192	0.378731	0.0275717	0.0551621	0.0322591
FRK	0.0452448	0.00666923	0	0	0.00406988	0	0	0	0	0.00221564	0.000900934	0	0.00362532	0	0
FRMD4A	0.0222717	0.0936602	0	0.0077722	0	0.00842621	0	0.0125451	0	0.0748834	0.275523	0.015618	0.0115825	0.00428726	0.0081395
FRMD8	0.0663104	0.100345	0.209476	0.118187	0.123232	0.086163	0.066216	0.133951	0.162228	0.114636	0.100706	0.113082	0.148589	0.0814596	0.110555
FST	0	0.0682552	0	0.00954831	0	0	0	0	0	0.00528248	0.00299857	0.00207757	0.005401	0	0.00187432
FSTL1	0.107437	0.619117	0	0.0406344	0	0.0183448	0.0195227	0	0	0.0423682	0.0170813	0.017155	0.0161061	0	0.0193517
FTL	1.71073	2.30426	2.20347	1.85676	1.99379	2.07639	1.73254	4.21224	2.96733	3.72963	4.97096	4.39002	3.21301	2.77585	1.91186
FXYD6	0	0.100021	0	0.00560222	0	0.00526638	0	0	0.0635989	0.0274747	0.112888	0.113437	0.0103958	0	0.003177
FYN	0.366517	0.84771	0.911967	0.972949	1.19811	0.929994	0.848769	0.107488	0.564872	0.487812	0.149566	0.542348	0.519706	0.188455	1.06039
FZD2	0	0.016221	0	0.00540057	0	0.000789248	0	0	0.0652323	0.0797333	0.0456869	0.0570537	0.0199739	0	0.00119628
FZD3	0.1522	0.0318499	0	0.0333685	0.0225222	0.0317976	0.00697642	0.0106831	0.123531	0.0216672	0.0131296	0.0072772	0.0805819	0.0209628	0.0237336
GABARAP	0.601928	0.309105	0.803135	0.401154	0.495428	0.353605	0.390215	1.07584	0.643462	1.14311	0.959491	1.39362	0.766412	0.429872	0.372868
GABARAPL2	0.500911	0.288161	0.509061	0.195276	0.380319	0.209956	0.22061	0.409331	0.459279	0.470987	0.270463	0.378445	0.295999	0.191627	0.279651
GAL3ST4	0	0.0339544	0	0.010974	0.0197259	0.023648	0.019352	0.00442594	0.101346	0.069034	0.34895	0.0585497	0.0274515	0.0195845	0.0287857
GALM	0.0898666	0.156994	0.485075	0.127862	0.543793	0.251489	0.0795215	0.0890258	0.0856868	0.155971	0.183997	0.0702005	0.062848	0.0179738	0.235485
GAS7	0.0509804	0.142184	0.0841984	0.0669773	0.00936739	0.0115165	0.167041	0.114044	0.104328	0.217484	0.289594	0.444113	0.290094	0.00457237	0.0516654
GATA2	0.121668	0.272454	0	0.0177878	0.00448894	0.0176395	0.0191202	0.127388	0.0678716	0.025373	0.0236067	0.00970652	3.1929	0.0146174	0.00865137
GATA3	1.25564	0.674104	0.399172	0.181197	0.710317	0.402632	0.369439	0.042165	0.10394	0.0314781	0.0338724	0.0395939	0.0329806	0.0232686	0.29459
GBP1	0.0585965	0.10887	0.375359	0.20772	0.260422	0.108216	0.123069	0.178188	0.0558448	0.330588	0.169547	0.357407	0.0462259	0.0230212	0.126629
GBP2	0.512872	0.285688	0.348596	0.287186	0.906284	0.257641	0.296319	0.386991	0.0759678	0.340938	0.245183	0.468607	0.0535949	0.0562391	0.243578
GBP4	0.0532737	0.119165	0.202835	0.123093	0.227259	0.0918563	0.203889	0.0711381	0.0732175	0.168615	0.111892	0.217166	0.0178698	0.0789491	0.0906217
GBP5	0.0655603	0.185215	1.0363	0.35205	0.937158	0.253399	0.354074	0.239946	0.133918	0.123626	0.112068	0.223591	0.0166581	0.0744469	0.319492
GCH1	0	0.0511689	0	0.137335	0.135032	0.0913882	0.106712	0	0.0816087	0.0735989	0.0379211	0.267517	0.0299603	0.0348414	0.0976538
GCHFR	0.0892441	0.0861911	0.0433223	0.0474735	0.191745	0.103754	0.103451	0.00442594	0.156175	0.0610036	0.150409	0.0665978	0.132448	0.0342983	0.173364
GFI1	0.127274	0.144741	0.137525	0.129836	0.131993	0.0926918	0.157781	0.0214423	0	0.01414	0.0108701	0.00476915	0.0930052	0.0181736	0.190067
GFOD1	0.0346649	0.167283	0.275452	0.173651	0.0266711	0.0167722	0.229474	0.0219417	0.164808	0.0579526	0.0447406	0.120865	0.0296225	0.0982181	0.101173
GFOD2	0.149725	0.0591235	0	0.0178711	0.043632	0.0236934	0.026397	0.0405952	0.0360761	0.0189651	0.0250541	0.0162766	0.0579542	0.0450869	0.0243144
GFPT2	0	0.045042	0	0.00804535	0	0.00173875	0.00568148	0.00746893	0	0.00570376	0.00212049	0.00238302	0	0	0.015123
GGT5	0.078508	0.116593	0	0.00236638	0	0	0	0	0	0.00668158	0.00125357	0	0	0.00563657	0.00240846
GIMAP4	0.142433	0.389857	0.632684	0.452525	0.254515	0.522493	0.327652	0.366672	0.062476	0.310074	0.393244	0.616414	0.0351049	0.0215534	0.426549
GIMAP5	0.0432887	0.0371202	0.056803	0.0151642	0.00347516	0.0195579	0.0115615	0	0	0.00203373	0.00594312	0.012881	0	0	0.00622636
GIMAP8	0.040724	0.0915938	0.060593	0.0477741	0.0282311	0.0578824	0.0515623	0	0	0.0493896	0.0791656	0.148279	0.0172863	0	0.0433
GIPR	0	0.0127662	0	0.00844884	0.00583723	0.00625704	0	0	0	0.013076	0.00158289	0	0.0397476	0	0.0163107
GJB1	0	0.00194881	0	0	0	0	0.00575145	0	0	0	0	0	0	0	0
GK	0	0.015657	0	0.00950872	0.148639	0.0135259	0.0194298	0.30494	0.114766	0.1789	0.0993889	0.261166	0.055701	0.00626091	0.0169225
GLRX	0.190081	0.218434	0.206864	0.260264	0.626967	0.197913	0.224591	0.35471	0.314971	0.503885	0.436079	0.634786	0.242898	0.102922	0.191764
GLRX2	0.0464793	0.0410966	0	0.0121737	0.030171	0.0103975	0.0242235	0.0147212	0.0600543	0.0381121	0.0468508	0.0372693	0.0459571	0.0267027	0.0171219
GLUL	1.10682	1.01387	0.846291	0.519295	0.234494	0.298843	0.434504	2.00554	1.26631	1.30264	1.66584	1.8454	2.09555	0.181135	0.428627
GNG11	0.0483502	0.103605	0	0.0154284	0	0.00361428	0.0101335	0	0.0407914	0.00244283	0.00382782	0.00284233	0.0106539	0.0136859	0.00886856
GNG5	0.296895	0.41713	1.02596	0.364265	0.683694	0.300253	0.402487	0.673436	0.910196	0.990273	0.830668	1.01519	0.527365	0.39781	0.396436
GNG7	0.168886	0.028464	0	0.00268716	0.0230255	0.0124314	0.00969887	0.0721438	0.275885	0.103871	0.0433681	0.0233959	0.0850118	0.369248	0.0117513
GNLY	0.33317	0.970911	0.160691	3.20708	0.190939	0.112682	1.9762	0.0889858	0.139149	0.110009	0.106814	0.105782	0.0498038	0.0802181	0.620049
GNPTAB	0.235732	0.300334	0.109974	0.543916	0.267768	0.143368	0.221226	0.056988	0.275129	0.190481	0.25951	0.205223	0.956991	0.175615	0.24198
GPC4	0.0222717	0.0192032	0	0.00890408	0	0.00172396	0.00466754	0.00442594	0	0.0303477	0.131126	0.0159508	0.0106129	0.00429565	0.00227262
GPNMB	0.0820422	0.388741	0.231603	0.0505943	0.108479	0.100677	0.103248	0.0246522	0.388456	0.281966	1.63203	0.116034	0.213728	0.154444	0.113829
GPR146	0.0408821	0.0563881	0	0	0.0141674	0.01193	0.0102174	0	0	0.0170055	0.0132021	0	0.0137388	0	0.00234836
GPR171	0.208456	0.31879	0.223649	0.231922	0.272537	0.780919	0.248307	0.0531428	0.291714	0.0817717	0.033883	0.0406767	0.00532856	0.0319562	0.520123
GPR18	0.0417415	0.0211128	0	0.0412389	0.0205928	0.0400103	0.0294079	0.012062	0.0567267	0.0531527	0.02118	0.0191534	0	0.234836	0.0702404
GPR183	0.309064	0.544787	0.290332	0.112645	0.522252	0.950257	0.528543	0.0678868	2.27847	1.63017	0.855204	0.807811	0.300473	0.930498	0.481799
GPR19	0	0	0	0	0.0170757	0.00285021	0	0	0	0.00270366	0	0	0	0	0.0028633
GPR65	0.137335	0.17384	0.184004	0.466783	0.104366	0.166824	0.393943	0.202032	0.460505	0.160974	0.174222	0.173925	0.808057	0.167116	0.198431
GPS2	0	0.0165361	0.226859	0.0347195	0.0115287	0.0297208	0.0329823	0.0245828	0.0319358	0.038337	0.0405641	0.0274819	0.0596591	0.052719	0.0322222
GPX1	0.59825	0.58563	0.260209	0.190905	0.558372	0.292324	0.298638	0.469391	2.03241	2.36171	2.36068	1.87473	1.25046	0.46207	0.234567
GRAP2	0.040188	0.125651	0.319809	0.21245	0.104441	0.146928	0.0286943	0.00528446	0.126586	0.0203493	0.015182	0.00625773	0.938812	0.0257405	0.186665
GZMA	0.121735	0.523817	2.42667	1.88234	0.256504	0.451884	1.25709	0.154094	0.0894044	0.133464	0.102641	0.0936795	0.0499214	0.0965898	1.12681
GZMB	0.0494736	0.349818	0.541474	1.82715	0.147985	0.0354579	0.630068	0.0573242	2.32176	0.0607874	0.0654817	0.104404	0.0701092	0.0870689	0.333534
GZMH	0.160812	0.355615	1.13319	1.98224	0.0361215	0.0453776	0.249017	0.0525185	0.0228076	0.0671263	0.0479504	0.0742275	0.0336187	0.0448544	0.546334
GZMK	0.178249	0.258142	0.738556	0.122888	0.154205	0.292492	0.705992	0.0385239	0.139761	0.0980308	0.0737813	0.0377456	0.0300858	0.0558931	0.928711
GZMM	0.284562	0.226303	0.272308	0.824571	0.166961	0.279311	0.460033	0.0870457	0.0900698	0.059781	0.0287011	0.0347883	0.0135356	0.0314772	0.528294
HAGH	0.121183	0.251488	0.311652	0.145588	0.126937	0.133996	0.11509	0.042552	0.289664	0.213102	0.171218	0.231189	0.204925	0.11083	0.156925
HAL	0	0.00467737	0	0	0	0.00204187	0	0.221119	0	0.00641694	0.00242305	0.0680393	0.0131139	0	0
HAPLN3	0	0.0213377	0.0835055	0.00262222	0.225181	0.0585675	0.0555456	0.00847146	0.119937	0.0388691	0.0109404	0.0106033	0.00746527	0.0154212	0.0263432
HCK	0.0503547	0.193502	0.0441259	0.0351558	0.0478968	0.0349597	0.0492041	1.24435	0.379693	0.917323	0.737546	1.58449	0.0536466	0.0803649	0.0443666
HDC	0	0.103085	0	0.00996941	0.0161847	0.00886139	0.00354432	0.0263247	0	0.00895203	0.012394	0.0101577	2.01564	0.00373148	0.000934689
HERPUD1	0.50374	0.893193	1.08522	0.540714	0.922321	0.430183	0.470451	0.407815	1.87378	1.77715	1.36179	1.3451	0.524605	1.1411	0.634123
HESX1	0.0222717	0	0	0.00239094	0	0	0.00528796	0	0	0.0167661	0.0105376	0.00786954	0	0.00977907	0
HHEX	0.0647366	0.0620359	0	0.00516134	0	0.00156205	0.0312837	0	0	0.0947451	0.0790402	0.0704261	0.0891524	0.135391	0.00632629
HIC1	0.0336762	0.0820426	0	0.0270598	0.00515815	0.0144385	0.0202281	0.0273595	0	0.0339161	0.0130421	0.0427158	0.0179969	0	0.0212949
HIST1H2AE	0.0368889	0.00303321	0.131681	0.00326781	0.0264057	0.00748558	0.0205638	0	0.0215327	0.012647	0.00874961	0.00653458	0.00657671	0.0184009	0.00671571
HIST1H2BC	0.0346649	0.0102882	0	0.004107	0.0277864	0.00482759	0.010096	0.0665272	0.0602565	0.0174235	0.013681	0.0204317	0.00605846	0.0137786	0.00945985
HIST1H2BG	0.0346649	0.0788674	0.21875	0.0423306	0.109086	0.0442961	0.048319	0.00768806	0.137783	0.0516987	0.0485274	0.0522248	0.0695463	0.0421037	0.0414575
HK3	0	0.0230292	0.0638201	0	0	0.000962826	0.0226721	0.163778	0.15994	0.0724134	0.194206	0.542221	0	0.00582587	0.00725422
HNMT	0.0401982	0.101751	0	0.00933532	0.00822131	0.0102311	0.00488339	0.0138944	0.215021	0.318515	0.414327	0.317142	0.0190503	0.0205364	0.0167104
HOMER2	0.0401374	0.0291953	0.056803	0.00247648	0.00325562	0.00109014	0	0	0	0.10484	0.00522996	0.00682257	0.151277	0.0180297	0.00563282
HOXA1	0	0.00292776	0.0543466	0.0120547	0.00889829	0	0.00397698	0	0	0.00152802	0.000538841	0.00217384	0.00839002	0	0.00174047
HPGD	0.0222717	0.103817	0.0459453	0.074902	0.155955	0.0569985	0.0580638	0.0207748	0	0.053922	0.0292915	0.00930057	2.05671	0.0144852	0.0282187
HPGDS	0	0.0431884	0	0.00443647	0.0136455	0.00314346	0.0171458	0.012533	0.0314133	0.0231717	0.0870313	0.021701	1.80959	0.00497587	0.00182544
HPRT1	0.108357	0.0583821	0.643308	0.0900195	0.201097	0.0870454	0.132968	0.0232793	0.163816	0.187793	0.134045	0.172404	0.118121	0.0412999	0.090125
HPSE	0.0715538	0.0341253	0	0.0260415	0.0619618	0.0302331	0.0156064	0.0316943	0.0313912	0.0751091	0.0902626	0.249185	0.0155364	0.0165316	0.0352649
HRH1	0	0.0121242	0	0.00279295	0	0.00351152	0	0	0	0.00291247	0.0446834	0.0060872	0.0119702	0	0.00393712
HSD17B10	0.100813	0.153984	0.528976	0.129349	0.222836	0.134999	0.168369	0.0114953	0.112916	0.229117	0.134582	0.262502	0.109627	0.106857	0.136866
HSPA1A	0.719293	0.489444	1.1073	0.340754	1.68374	0.534788	1.14849	0.381496	0.863729	0.812167	0.978554	1.28906	1.15961	0.838485	0.484925
HSPA6	0	0.0332049	0.319813	0.154699	0.260885	0.115236	0.515066	0.366378	0.405302	0.177293	0.155746	0.37918	0.0344707	0.193724	0.119134
HSPG2	0.0464793	0.509451	0	0.0197704	0	0.00658046	0.0140792	0	0.0685371	0.0314689	0.0172992	0.0229181	0.478843	0.023146	0.016868
HTATIP2	0.0222717	0.120007	0.384822	0.0912426	0.374481	0.104832	0.102163	0.0949658	0.0617312	0.140799	0.145886	0.199266	0.148326	0.0794595	0.0950653
HTRA1	0	0.2761	0	0.0398745	0.0229525	0.048308	0.0381955	0.0208224	0.130247	0.0760042	0.370793	0.0745738	0.0169725	0.00464583	0.0759466
HVCN1	0.0509804	0.0639707	0	0.0256765	0.00999954	0.0201915	0.0698056	0.0925152	0.164288	0.130088	0.176759	0.243693	0.0789752	0.611084	0.0240769
HYAL2	0.199021	0.312128	0	0.0216083	0.0281745	0.0110892	0.0339245	0	0.153111	0.0415737	0.106528	0.0541345	0.0399604	0.0272907	0.0177777
ICA1	0.246355	0.120585	0.152134	0.0241291	0.263424	0.0174877	0.00844746	0	0	0.0353177	0.0544917	0.0117133	0.0574358	0.00511156	0.0107695
ICOS	0	0.0534404	0.913216	0.0704258	0.821569	0.220342	0.0914943	0.00847146	0.0387427	0.0176532	0.0195281	0.0177589	0	0.0264874	0.159609
ID1	0.0375143	0.236995	0	0.0255766	0.0235457	0.021465	0.0542956	0.0117602	0.124563	0.0232044	0.0233606	0.0648143	0.00906097	0.0445423	0.0261257
IDO1	0	0	0	0	0	0.00192123	0	0.0118509	0	0.0296767	0.00586643	0.0235221	0	0.00979145	0.000246062
IFI27	0.128744	0.393644	0.231102	0.0345483	0.374539	0.0488987	0.0716802	0.0338541	0.316623	0.166655	0.514018	0.158386	0.0476911	0.0458625	0.0770125
IFI30	0	0.0552608	0	0.0120026	0.00552524	0.00122908	0.00877983	0.0671816	0.23209	0.400418	0.285777	0.607334	0.0025307	0.0368378	0.0130236
IFI44L	0.085403	0.172561	0.792295	0.0960554	0.350763	0.275988	0.420189	0.0832346	0.582721	0.614464	0.501031	0.471782	0.174226	0.622269	0.141415
IFI6	0.205477	0.238833	1.22494	0.241369	0.790741	0.21818	0.434188	0.16895	0.608403	0.715842	1.06906	0.749913	0.382633	0.25442	0.252814
IFNG	0.152331	0.066976	0.489436	0.302533	0.094371	0.0644069	0.30978	0.0237408	0.0180729	0.0125196	0.0225295	0.0254756	0.00591008	0.0192013	0.383072
IFT20	0.102134	0.12405	0	0.0865643	0.0692669	0.0736644	0.0504512	0.0260886	0.114854	0.237807	0.0890032	0.190824	0.0729916	0.0389759	0.0764679
IGF2	0	0.71597	0	0.0450777	0	0.012622	0.0153133	0.0122303	0.0547158	0.0649508	0.0631365	0.0443496	0.0419189	0.0301195	0.0158087
IGFBP2	0.056664	0.159663	0	0.00219182	0	0.00365722	0.131669	0	0.0723017	0.00954436	0.00475969	0.0282875	0.00295337	0.0104341	0.0216218
IGFBP5	0.0666528	0.21786	0	0.0158492	0.00472113	0.00435227	0.00889039	0	0	0.0185684	0.0128212	0.0159115	0.0126329	0.00350797	0.00393916
IGFBP6	0.0336762	0.139271	0	0.0214904	0	0.00950139	0.0157173	0	0	0.00592966	0.0133807	0.00842629	0.00879735	0.0104579	0.0330309
IGHD	0	0.0567841	0	0	0	0.000948861	0.00915347	0	0.0621527	0.00230356	0.00148114	0.00863657	0	0.85264	0.000764758
IGHM	0	1.24113	0.120184	0.106045	0.102774	0.0894238	0.140272	0.12409	0.79139	0.127127	0.0717057	0.188456	0.167223	2.7425	0.0714089
IGKC	0.375412	1.68242	1.03014	0.44561	0.617361	0.494329	0.724644	1.30503	1.92039	0.86381	0.673648	0.977223	1.17727	2.79579	0.341532
IGSF6	0.12395	0.086833	0	0.00903624	0.0268044	0.0116615	0.0119862	0.316609	0.148816	0.637686	0.512703	0.585429	0.0301264	0.00428726	0.0206473
IKZF2	0.0425083	0.0404545	0.142435	0.0473619	0.541225	0.0383433	0.113444	0	0	0.00959018	0.0163254	0.00586892	0.0322512	0.0111574	0.0291842
IL10RA	0.0774877	0.221486	0.266535	0.409376	0.617482	0.389097	0.343969	0.180363	0.280735	0.523646	0.397975	0.482731	0.0204765	0.198187	0.456165
IL12RB2	0	0.0118244	0	0.00241881	0.129789	0.00800948	0.0406791	0	0	0	0.0109366	0.00598609	0.00332416	0	0.0111179
IL15RA	0	0.0636335	0.0433223	0.0447455	0.0943937	0.0402833	0.0582734	0.0260118	0.0548061	0.039912	0.0473755	0.0650235	0	0.0131796	0.0466471
IL18	0.0222717	0.0685855	0.0883448	0.00473915	0.00957736	0.0110072	0.0411862	0.038749	0.0706596	0.443755	0.364765	0.192338	0.491074	0.0182817	0.0131432
IL18R1	0.127968	0.0857321	0	0.0267746	0.18185	0.108732	0.203986	0.0548892	0.0228076	0.0769496	0.00762426	0.00846563	0.808303	0	0.040478
IL18RAP	0.0456086	0.0898493	0.0459453	0.0737494	0.0403944	0.0590237	0.177224	0.312051	0	0.0345801	0.00127549	0.0151528	0.0132786	0	0.0702632
IL1A	0	0	0	0	0.0177602	0.000557605	0	0	0	0.0102142	0.00620405	0.00777379	0.00600458	0.00449496	0.000588453
IL1B	0	0.0615393	0.173157	0.032211	0.0144116	0.0208349	0.0319704	0.216934	0.135217	0.60902	0.236313	0.774747	0.00986171	0.0224342	0.0224311
IL1R2	0.112014	0.0463697	0.148415	0.00340322	0.107676	0.00634921	0.0072318	1.41057	0.257528	0.464328	0.0616721	0.212687	0.0235314	0.00914635	0.00325532
IL1RAP	0	0.0412822	0	0.0176444	0.0201565	0.0234176	0.0135797	0.253826	0	0.0737762	0.0731608	0.176108	0.0624634	0.0107866	0.0265762
IL1RL1	0	0.0707334	0	0.0119572	0.0368707	0.00178214	0.00419617	0.0509786	0	0.0151624	0.00424647	0.00839969	1.8187	0	0.00584373
IL2RA	0	0.071344	0.403105	0.00292009	0.980959	0.0738806	0.0635135	0	0.0678716	0.00395761	0.0213527	0.00900788	0.0374457	0.0826474	0.0253953
IL2RB	0.157942	0.574773	0.859007	0.894704	1.12692	0.377794	1.98564	0.121574	0.217676	0.0645045	0.0627916	0.0551261	0.0409271	0.059916	0.835867
IL2RG	0.471371	0.715367	1.57733	1.30534	1.63839	1.12761	1.13041	0.670307	0.547015	0.56742	0.323133	0.28909	0.256017	0.622785	1.16017
IL32	1.00766	1.03703	2.87293	2.32341	3.2346	2.12925	1.17818	0.108865	0.179105	0.180791	0.198238	0.107635	0.0715656	0.112729	2.4267
IL3RA	0.0420689	0.0250209	0	0	0	0.00532368	0.0064512	0.029337	1.28884	0.0280945	0.0267414	0.0517335	0.041946	0.00541248	0.00149166
IL4	0	0	0	0	0	0.00119406	0	0.011014	0	0	0.00161642	0	0.0164477	0	0.0021458
IL4I1	0.0222717	0.021857	0	0.00714498	0.0234572	0.0472995	0.0450146	0.00442594	0.159408	0.101373	0.120709	0.0694701	0.00941227	0.00803522	0.0143155
IL4R	0.0681655	0.182219	0.31044	0.141025	0.417563	0.177536	0.271393	0.431994	0.243788	0.194753	0.192197	0.209138	0.809511	0.332797	0.127027
IL5RA	0	0	0	0.00348541	0	0.00468567	0.00450341	0	0	0	0.0022038	0	0.172704	0	0.00315143
IL6ST	1.25128	0.778173	0.127016	0.157656	0.413514	0.348954	0.116978	0.0139358	0.312137	0.211347	0.192016	0.2347	0.182563	0.0703034	0.19039
IL7	0	0	0	0.00317648	0.0300446	0.00230526	0	0	0	0.00331348	0.00455383	0.00204257	0.00968291	0.0230749	0.000823088
IL7R	1.19954	1.69371	0.296973	0.547543	1.08026	2.53701	1.01774	0.123177	0.274185	0.216636	0.190776	0.134039	0.0841386	0.124665	1.4698
ING2	0.0483502	0.0370408	0	0.0303557	0.0222612	0.0278348	0.00944435	0.0118971	0.0180729	0.0525618	0.0562224	0.0408891	0.177664	0.017726	0.0315393
IRF2	0.0368889	0.117745	0.417166	0.127259	0.215291	0.112369	0.142251	0.128336	0.0408804	0.191939	0.164477	0.201199	0.231252	0.216712	0.137711
IRF8	0.0414096	0.0948374	0.0670059	0.0483457	0.0422693	0.0267102	0.140909	0.0782924	2.00424	0.321176	0.386169	0.488413	0.0610307	0.993926	0.0257971
IRF9	0	0.0308838	0	0.0222026	0.047578	0.0164057	0.0252006	0.189127	0	0.0233913	0.0166139	0.071175	0.0248209	0.0425745	0.0168544
IRS1	0.140516	0.0514884	0	0.00614341	0	0.010903	0	0	0	0.00591483	0.000476109	0	0	0.0416813	0.00342342
ISG15	0.115078	0.244561	1.27389	0.229503	0.961244	0.285137	0.512172	0.115321	0.421109	0.649281	0.466618	0.782005	0.344362	0.434531	0.263132
ISG20	0.244007	0.55858	0.979111	0.662389	0.961923	0.579453	0.570702	0.410076	0.575969	0.334373	0.119894	0.309471	0.0695729	0.909545	0.592825
ISLR	0	0.174704	0	0	0	0.00226466	0.00446957	0	0	0.00446406	0.0041901	0.00314918	0.00451497	0.0103437	0.00227809
ITGA9	0	0.0487974	0	0	0	0	0.00994703	0	0	0.0120919	0.0556386	0.01413	0.18152	0	0.00194274
ITGAM	0.140111	0.151498	0.09649	0.442383	0.0614658	0.0251516	0.304748	0.299197	0.274915	0.564416	0.494137	0.657162	0.477519	0.123778	0.0644978
ITGAX	0.0638667	0.193407	0.0644197	0.10876	0.0436084	0.0227453	0.276182	0.997931	0.239425	0.917637	0.664054	0.972204	0.413571	0.058437	0.0387936
ITGB4	0.323571	0.154408	0	0.00535953	0.0119017	0.00710532	0	0	0.0658887	0.00424575	0.00292371	0.00776466	0.01111	0.0124027	0.00255613
ITK	0.200864	0.356231	0.273279	0.504108	0.503282	0.707135	0.206967	0.0527235	0.154644	0.0712199	0.0440684	0.0312167	0.205735	0.0696214	0.502957
ITM2A	0.297977	0.440818	1.27552	0.352564	0.968466	0.640629	0.37078	0.0779389	0.15456	0.0752756	0.0493475	0.0661218	0.641619	0.109747	0.624529
JAM2	0	0.0697619	0	0.00273726	0	0.00108034	0.00554936	0	0	0.00424469	0.0207106	0.0160376	0	0.0100847	0.00089867
JRKL	0	0.011965	0	0.0113911	0.0132444	0.0135983	0.00961811	0.011856	0	0.0155534	0.00838508	0.0111249	0.0342105	0.00408248	0.0173616
JUP	0.419726	0.258864	0	0.0200667	0	0.00694163	0.0467322	0.0446422	0	0.197665	0.104204	0.192728	0.39257	0.0936176	0.00639131
KCNA3	0	0.0206422	0	0.0322905	0.0460792	0.0423198	0.0260596	0	0	0.00103561	0.000806114	0	0.00525474	0.00817298	0.0287725
KCNG2	0	0.00592764	0	0	0	0	0	0	0.146768	0.00517977	0.00644435	0	0	0	0
KCNJ15	0	0.0106452	0	0.00550733	0	0	0	0.470945	0	0.0135219	0.0097924	0.0259767	0.00315049	0.0102543	0
KCNN4	0.125009	0.0463791	0.0835055	0.023636	0.200185	0.0316448	0.0156238	0	0	0.152148	0.0799554	0.0935523	0.04336	0.208473	0.0349098
KDR	0	0.0963138	0	0.00527036	0	0	0.00429254	0	0.0407914	0.00219986	0.00297714	0.0052966	0.0120959	0.00497801	0
KIF22	0.0868423	0.174841	0.612502	0.101689	0.117864	0.0837664	0.108399	0.02762	0.0747999	0.10318	0.0771355	0.11517	0.18644	0.0564941	0.101142
KIR2DL1	0	0.0229118	0.0809527	0.226299	0	0.000958421	0.0459323	0	0	0.0030198	0.00336533	0.00195467	0	0	0.00669553
KIR2DL4	0	0.0261017	0.0543466	0.0342989	0	0	0.223785	0	0	0.00334943	0.00284121	0	0	0.00430973	0.011831
KIR3DL1	0	0.0395329	0	0.138861	0	0.00103689	0.0576792	0	0	0.00749333	0	0.00553447	0	0	0.00175058
KIR3DL2	0	0.0129281	0	0.108485	0.0130274	0.00915655	0.0375375	0.0099457	0	0.00166521	0.00149599	0	0	0	0.016952
KIRREL	0	0.0493221	0	0	0	0.00106485	0	0	0	0	0.00189634	0	0	0	0.000971556
KIT	0.348653	0.273793	0	0.00797365	0.0103858	0.0200654	0.299173	0.042106	0.0688234	0.0247934	0.0227554	0.0369933	3.21181	0.0260869	0.0122074
KLHL18	0.0910703	0.0338333	0.0603073	0.0186723	0.0309636	0.0241026	0.0590565	0.0113851	0.067428	0.0719926	0.0583063	0.0745301	0.0642594	0.0331777	0.030816
KLRB1	0.587972	0.770605	0.386888	0.492876	0.308698	1.01131	1.29795	0.0391094	0.0794327	0.0816586	0.0601464	0.049697	0.0685744	0.0544067	0.621145
KLRC1	0.226112	0.0830748	0.0543466	0.0471854	0.014726	0.0123388	0.621345	0.0182845	0.0547158	0.0144196	0.00380129	0.00950674	0.00225418	0.00441355	0.320467
KLRC4	0	0	0	0.0150144	0	0.00313806	0.0313759	0	0	0	0	0	0	0	0.0109918
KLRD1	0.391081	0.727582	0.187797	2.22587	0.124679	0.0746875	1.85922	0.137093	0.0628711	0.0898803	0.0763736	0.0898661	0.0704547	0.0445557	0.961045
KLRF1	0.0433873	0.160222	0.0744848	0.424081	0	0.00236652	0.48216	0.0638225	0	0.0140055	0.00636023	0.0214014	0.00862379	0.0203618	0.0111623
KLRG1	0	0.101643	0.384815	0.49266	0.0468712	0.0924296	0.0826874	0	0	0.0271986	0.0170193	0.00421691	0.223796	0.00375284	0.174946
KLRK1	0	0	0	0.00889948	0.00710878	0.00123549	0.00947174	0	0.0245234	0	0	0.00314778	0	0	0.0120901
KRT19	2.12023	0.513539	0	0.0395567	0	0.0145926	0.0144093	0.0137078	0.0771503	0.0260913	0.0148217	0.0195782	0.201012	0.0193177	0.0149489
KRT5	0.2807	0.0461093	0	0	0.00645159	0.00317523	0.00822506	0	0.434835	0.0167358	0.0194136	0.0236156	0.00583677	0	0.00218674
KSR1	0	0.0562937	0.0543466	0.0183805	0.0590399	0.0320493	0.0766614	0.0352467	0	0.0719539	0.0314875	0.116435	0.057311	0.0235838	0.040383
KYNU	0.0222717	0.0466548	0	0.00239414	0.00925829	0.00264964	0.0235354	0.0187991	0.309216	0.18681	0.149695	0.275617	0.00870405	0.117002	0.00833925
LAG3	0.086371	0.0993068	1.07984	0.204261	0.122258	0.0681737	0.0630488	0	0.0404796	0.0200788	0.0234318	0.026111	0.0115981	0.0182145	0.29863
LAIR1	0.0802391	0.226534	0.174815	0.229782	0.0640776	0.114944	0.193356	0.0671303	0.634887	0.375655	0.863031	0.609873	0.779672	0.160963	0.189325
LAIR2	0	0.0073819	0	0.123631	0.372254	0.0314832	0.0916652	0.00803387	0.0288101	0.0965714	0.0639575	0.175862	0.0202414	0.0641928	0.0274696
LAMP3	0.0714429	0.0321108	0	0.00334104	0.0388865	0.00507131	0.0132695	0.00731774	0.0681366	0.0471122	0.00855687	0.00245613	0.0115904	0.00461467	0.0135534
LASP1	0.381379	0.532339	0.865276	0.495254	0.66455	0.2707	0.531573	0.500638	0.630847	0.479902	0.512221	0.564177	0.668347	0.17136	0.363162
LAT	0.176244	0.371234	0.875809	0.62459	0.738967	0.578738	0.313074	0.0734702	0.115114	0.0494937	0.0519863	0.0325608	1.10904	0.0415369	0.614228
LCK	0.252499	0.423435	1.21888	0.890856	1.03149	0.852593	0.493719	0.0688211	0.141947	0.0776896	0.0580327	0.0323618	0.0381024	0.152047	0.916022
LDB2	0.078547	0.0935155	0	0.00707457	0.00422153	0.00122503	0.0846976	0	0.0458952	0.00481609	0.0023784	0.00375099	0	0.00519467	0.00506836
LEF1	0.0417415	0.0799098	0.0835055	0.0566027	0.276848	0.335276	0.0840393	0.0114953	0	0.00933561	0.0106713	0.0171262	0.0101133	0.0287098	0.052119
LGALS1	0.393204	0.529818	1.2222	0.693387	0.966598	0.433535	0.370582	0.146299	0.893776	1.25214	1.26159	1.35777	0.778575	0.229995	0.633714
LGALS3	1.12673	0.761596	0.307426	0.157133	0.388358	0.306598	0.118914	0.113382	0.78775	0.810077	1.29172	0.950761	0.913681	0.0878561	0.378312
LILRA1	0	0.0106915	0	0.00199862	0.00661765	0	0	0.0237814	0.0622416	0.0931751	0.0405086	0.373479	0.0044493	0	0.00173872
LILRA2	0	0.0556441	0.0441259	0.0105781	0.00703096	0.00778513	0.0105807	0.430626	0.0180729	0.205665	0.217865	0.528666	0.0947721	0.0291217	0.00554492
LILRA4	0	0.0130653	0	0.00647223	0.00309823	0.00288231	0	0.0113851	1.27465	0.0126568	0.0338518	0.0327693	0.00297385	0.0130572	0.00491187
LILRA5	0	0.0176751	0	0	0.0123411	0.00272709	0.00590539	0.0855123	0.0953559	0.0538596	0.0364267	0.310857	0	0.00328423	0.00163405
LILRA6	0	0.00964592	0	0.00387956	0	0.00377806	0.00587506	0.0482971	0.0180729	0.0661297	0.0818731	0.131816	0.00385918	0.00414224	0.00470022
LILRB1	0.0503547	0.0485851	0	0.121557	0.0106991	0.0103751	0.00808251	0.00442594	0.286609	0.243394	0.281973	0.718211	0.0105358	0.109674	0.0294734
LILRB2	0	0.129412	0	0.0118473	0.0158027	0.00611162	0.0305674	0.330433	0.135108	0.396187	0.407313	1.16559	0.0652952	0.0229857	0.017168
LILRB4	0.0222717	0.0837266	0.0630524	0.00979517	0.0301107	0.0217301	0.0385905	0.0174642	0.935859	0.480938	0.757747	0.499453	0.0325907	0.0552993	0.0332327
LIMA1	0.36877	0.207778	0.0433223	0.0585549	0.187702	0.0357986	0.0400197	0	0	0.0816509	0.0777644	0.02774	0.0398308	0.0102323	0.0353025
LIMK2	0.169966	0.0553093	0	0.0558462	0.0800137	0.0544458	0.0163159	0.689798	0.053664	0.0350797	0.0454496	0.100629	0.0735714	0.0359683	0.036256
LINC00152	0.0368889	0.119286	1.01108	0.291191	0.442338	0.158251	0.107888	0.0944534	0.100768	0.14664	0.10987	0.166542	0.0642306	0.0216604	0.353197
LINC00921	0	0.0165489	0	0.0114587	0.00617321	0.00626624	0.0201267	0.0126184	0	0.00565784	0.00735955	0.0198152	0.0107251	0.00939502	0.011625
LINC01140	0	0.00895059	0	0	0	0	0	0	0	0	0.000622671	0	0.0574272	0	0.000832801
LIPA	0.185972	0.329433	0.302284	0.223878	0.13752	0.204557	0.125376	0.0356562	0.537368	0.615964	1.42912	0.785216	0.180688	0.209301	0.211088
LOX	0.0401374	0.111614	0	0.00288119	0	0	0.0059576	0	0.0407914	0	0.00112519	0.00606916	0.00697565	0.00980892	0.000775023
LPAR1	0	0.0343185	0	0.0029146	0.00885026	0	0.0228724	0	0	0.0228632	0.0344552	0.0217748	0	0	0.00135832
LRMP	0.0834868	0.107343	0.0835055	0.068976	0.00624211	0.0428266	0.136407	0.315898	0.0747322	0.107769	0.098708	0.193384	0.136015	0.222914	0.0761892
LRP5L	0.0826963	0.0233564	0	0.00848176	0	0.0102983	0.0115224	0.0120398	0.069757	0.00806772	0.0173682	0.00973715	0.0368876	0.00829613	0.0118126
LRRC25	0	0.0835185	0	0.0104404	0.025594	0.0157544	0.0232221	0.808653	0.276179	0.33086	0.373535	0.810647	0.100366	0.0338424	0.0172448
LRRC32	0	0.0771385	0	0.0059857	0.106178	0.00455196	0	0.0121581	0	0.00363125	0.0033612	0.00831921	0	0	0.000950478
LRRC8D	0.250031	0.0798689	0.19194	0.0496137	0.136022	0.0926695	0.0623993	0	0.28115	0.110066	0.122467	0.129346	0.061464	0.0453794	0.0558719
LSM4	0.155102	0.195293	0.622662	0.197411	0.0973431	0.166295	0.192152	0.0522046	0.382804	0.339232	0.218112	0.226392	0.219035	0.132838	0.18152
LSP1	0.614469	0.98784	1.86006	1.39679	1.52756	0.980361	1.31087	2.51434	1.59154	1.79152	0.960764	1.81242	0.159818	1.03256	1.21017
LST1	0	0.269338	0.056803	0.0398818	0.154511	0.0694791	0.244846	1.35793	0.505004	1.49821	0.772452	1.93073	0.109544	0.0394205	0.0542711
LTA	0	0.00492945	0.216674	0.0345709	0.363788	0.0493705	0.102229	0	0	0.00148401	0.00120425	0.017742	0	0.0517183	0.0363379
LTB	0.183537	0.644967	0.537357	0.217557	2.13225	1.56141	0.847991	0.725677	1.08683	0.172128	0.115013	0.217117	0.116456	2.13003	0.589668
LTBP2	0	0.0312812	0	0.0103271	0	0.00343584	0	0.0126494	0.0407089	0.0100547	0.0477561	0.0153372	0.0266009	0.00505462	0.0035333
LUM	0	0.518793	0	0.0318366	0	0.0141095	0.0107205	0	0.131226	0.0409018	0.0270175	0.02942	0.0126232	0.00970697	0.00946423
LY6E	0.51223	0.511759	1.5153	0.776985	0.989888	0.518661	0.823065	0.145876	0.722173	0.798577	0.776382	0.769348	0.333888	0.605918	0.63003
LY86	0	0.0773089	0	0.00630817	0.00935434	0.00361627	0.0300376	0	0.126562	0.417424	0.450444	0.487221	0.0125598	0.428936	0.0132657
LY9	0.0409245	0.193542	0.252019	0.225457	0.0857726	0.213454	0.143575	0	0.236207	0.0432953	0.0429483	0.0314529	0.00740541	0.406012	0.241755
LYVE1	0	0.0925763	0.0737802	0.00457638	0	0.00541058	0.0086583	0	0.0407914	0.0311451	0.245056	0.0186203	0.00710031	0	0.00226534
LYZ	0.405801	0.651766	1.44793	0.494032	1.03909	0.629938	1.00119	1.40857	1.83227	3.97471	2.81596	4.31865	0.982275	1.1505	0.688303
MAFB	0.212451	0.602585	0.114581	0.0487788	0.0831501	0.0590336	0.0851729	0.0320767	0.454895	1.1331	2.0514	2.06425	0.104976	0.099249	0.0701284
MAGEH1	0.0680626	0.117827	0.0835055	0.069676	0.337827	0.067333	0.0640562	0.0114953	0.0674049	0.0404581	0.0429599	0.0146059	0.0758176	0.0625201	0.0438927
MAL	0.0528081	0.057432	0.0900891	0.0170839	0.213279	0.345463	0	0	0.0868101	0.0011112	0.00756356	0.0211971	0.0043721	0	0.0298629
MAN1A1	0.11998	0.218478	0.112641	0.124704	0.0868025	0.063103	0.090594	0.0895886	0.436113	0.263002	0.257337	0.167317	0.14352	0.0404795	0.0945622
MANEA	0	0.0353734	0.0549096	0.0159217	0.0462614	0.0344207	0.038653	0.0128209	0	0.0276171	0.034619	0.0303683	0.0383837	0.0246754	0.0209984
MAOA	0	0.0713931	0	0.00336605	0	0.00107554	0	0	0	0.00274594	0.0148921	0.00221933	0	0.00496098	0.00205099
MAOB	0	0.0388626	0	0.00265795	0.00887297	0.00188311	0.0091749	0.0109812	0	0.00558813	0.00409535	0.00976503	1.36649	0.00941409	0.00250568
MAP3K13	0.322063	0.11501	0.0809527	0.0578553	0.0141849	0.0626979	0.0610023	0.151801	0.093486	0.267803	0.112996	0.13978	0.0421171	0.0699258	0.0664223
MAP4K1	0.104761	0.163984	0.639241	0.241925	0.314515	0.191942	0.133678	0.0109165	0.339224	0.197932	0.0637123	0.0913533	0.168955	0.275032	0.254457
MAP4K2	0	0.141092	0.370259	0.0634659	0.176982	0.14663	0.0520009	0.127895	0.110976	0.0574373	0.0654253	0.0824606	0.0662601	0.159861	0.104429
MAP9	0.145734	0.0289467	0	0.0111683	0.00690638	0.018934	0.0391216	0	0.077679	0.00342228	0.0143905	0.00310844	0	0.0625264	0.0377707
MAPK7	0.0494736	0.103178	0.305407	0.0718773	0.0454192	0.0332262	0.0306293	0.0341168	0.0960322	0.0659985	0.0587554	0.336443	0.0486388	0.0302566	0.0300724
MAPKAPK3	0.153248	0.151022	0.246954	0.180154	0.336365	0.132111	0.24326	0.274829	0.262391	0.378904	0.284279	0.615825	0.330489	0.0467034	0.160112
2021-03-03	0	0.0417245	0	0.00458265	0.031055	0.00755899	0.0118863	0	0	0.00838934	0.0356953	0.00566693	0.204983	0.0635992	0.00515345
MARCO	0	0.0632459	0.0433223	0.0120107	0.0255073	0.0202353	0.0261764	0.0216352	0.123042	0.177897	0.582138	0.431922	0.0143667	0.0180836	0.0302803
MAT2B	0.350651	0.277877	0.316322	0.407243	0.571667	0.322553	0.392243	0.228093	0.376334	0.313843	0.255823	0.355449	0.353693	0.343054	0.379968
MATN2	0	0.0525059	0	0.00552733	0	0.00502122	0.020253	0.0100942	0	0.0020189	0.00157686	0.00843132	0	0	0
MEFV	0	0.00628095	0	0.00285297	0	0.00221477	0.00527928	0.278687	0.0288101	0.0584208	0.0184601	0.18964	0.00387461	0.00454588	0.00179072
MEG3	0	0.0888176	0	0.00772042	0	0.0024349	0	0	0	0.00460543	0.002688	0.0052324	0.252549	0	0.00269527
MEST	0	0.0422555	0	0.00675814	0.011926	0.00737265	0	0	0	0.0165468	0.0257265	0.0079249	0.00563683	0	0.00487764
MFAP4	0.0427445	0.324634	0	0.0278724	0	0.00335975	0.00465317	0.0211534	0.0582414	0.0121642	0.00482365	0.0142105	0.00397162	0.00434696	0.00996904
MFAP5	0	0.066729	0	0.00300865	0	0.00241043	0	0	0	0.015954	0.0106437	0.00220342	0	0	0.00334145
MGAM	0	0.0201249	0	0.00610775	0	0.00190963	0	0.360821	0.0314133	0.00498089	0.0097024	0.00819147	0.00315049	0.00517772	0
MGAT1	0.447034	0.573485	0.746594	0.367388	0.543623	0.293384	0.354021	0.516969	0.601875	1.15626	1.15883	1.35882	0.429097	0.206782	0.323839
MGST1	0.486806	0.161908	0	0.00846718	0.0104551	0.0067756	0.0191792	0	0.0313912	0.0707445	0.0862085	0.156575	0.0157032	0	0.00949141
MICAL3	0.232487	0.0755027	0.0835055	0.0266163	0.0597574	0.0464536	0.0398127	0	0	0.0212029	0.016257	0.012773	0.172333	0.309976	0.0530297
MLPH	0.534745	0.295481	0	0.00981229	0.00589496	0.0043691	0.0142437	0.00442594	0.0685371	0.0154433	0.0139614	0.00561427	1.07288	0.00966605	0.0127664
MME	0	0.0270663	0	0	0	0	0.00420773	0.780174	0.0387238	0.0024325	0.00359085	0.0076941	0.00479154	0.00459085	0.00340709
MMP2	0	0.233751	0	0.00538867	0	0.00353301	0.0239404	0	0.0206506	0.0412023	0.138515	0.0214666	0.00388367	0.0155759	0.00577261
MMP25	0	0.0396094	0.0459453	0.009376	0.0156653	0.0134192	0.0495721	1.16021	0.097452	0.0265458	0.00947238	0.0330891	0.0217708	0.00796878	0.0165608
MMP8	0	0	0	0	0	0	0	0	0	0.00166029	0.0102839	0	0	0	0
MMP9	0	0.0906543	0.181205	0.0099807	0.0848947	0.0316806	0.0296069	0.713332	0.210265	0.0668863	0.404928	0.0557048	0.0508376	0.044767	0.0418012
MMRN1	0.0757451	0.311552	0	0.0200543	0.00690736	0.013187	0.0808447	0.0112363	0.0634893	0.00723274	0.0110478	0.0033217	0.0317035	0.011599	0.00797839
MMRN2	0	0.155032	0	0.0110649	0.0110934	0.00556537	0	0	0	0.00390169	0.00520017	0.0151554	0.0181764	0	0.00104756
MNDA	0	0.103419	0.0658485	0.0119136	0.0276914	0.0104788	0.037695	1.38829	0.152657	0.875529	0.411491	1.08854	0.0227885	0.0815961	0.0252978
MOCS3	0	0.0207784	0.0543466	0.025228	0.00346206	0.010926	0.0167281	0	0.0245234	0.0105756	0.0202999	0.0406029	0.00873127	0.0055491	0.0175243
MPO	0	0.00409466	0	0	0.0104011	0	0	0	0	0.00720543	0.011159	0.00901479	0.0078329	0	0
MPPED2	0	0.0133596	0	0	0.0042082	0	0.0158426	0	0	0.00951811	0.00628153	0.00367185	0.00429147	0	0.0017822
MRPL3	0.238692	0.159538	0.0835055	0.102673	0.177358	0.123863	0.135962	0.0296811	0.274532	0.266141	0.196991	0.204252	0.121833	0.0970824	0.125337
MRPL36	0.0483502	0.047683	0.0874481	0.0725693	0.0693952	0.0359123	0.0376584	0	0.104158	0.0599212	0.0457411	0.0728387	0.0556488	0.029226	0.0434497
MRPL4	0.0997035	0.164809	0.185567	0.141899	0.154211	0.0992642	0.120559	0	0.391063	0.166182	0.155655	0.16072	0.145838	0.112582	0.0955376
MRPS6	0.268198	0.224546	0.479713	0.185575	0.319118	0.192944	0.304788	0.107743	0.25843	0.266395	0.163802	0.224403	0.306577	0.118543	0.217372
MRPS7	0.0983462	0.152541	0.271345	0.156148	0.153868	0.0962054	0.139607	0.0225814	0.0878298	0.174783	0.170986	0.192611	0.123373	0.0916703	0.120307
MS4A1	0.0336762	0.106296	0.125978	0.00986211	0.018475	0.0320023	0.0240914	0	0	0.0104453	0.0143929	0.0112327	0.00940137	1.57907	0.050837
MS4A2	0	0.123672	0	0.0209531	0.00536887	0.00949816	0.0141119	0.0549698	0	0.0149799	0.0224136	0.0148868	3.42145	0.00318458	0.00318099
MS4A3	0	0	0	0	0	0.000726363	0.00901617	0.0474751	0	0.00404177	0.00161642	0.00217207	0.0939996	0	0
MS4A4A	0	0.103098	0	0.011256	0.0489122	0.0148481	0.0132861	0.00664673	0.180986	0.279483	0.675544	0.325747	0.047002	0.0221143	0.0211602
MS4A6A	0.226399	0.288824	0	0.0289957	0.121913	0.0672104	0.068215	0.0759155	0.755922	1.93209	1.54599	1.36979	0.0786204	0.0746782	0.0708432
MS4A7	0.0591605	0.261701	0	0.0189409	0.0442585	0.0147627	0.0136746	0.0370781	0.388753	0.633827	1.33543	1.06591	0.0647083	0.103816	0.0341726
MSC	0	0.00863772	0.11711	0.0238419	0.013457	0.0116585	0.00960837	0	0.0288101	0.0022998	0.00541534	0	0.00375567	0.00362113	0.0214121
MSR1	0.0503547	0.121025	0.0433223	0.0119607	0.0389741	0.019543	0.0439693	0.0108607	0.198532	0.426079	0.808572	0.213372	0.0380255	0.0322949	0.0321298
MT1X	0.135292	0.185789	0.318114	0.159918	0.124397	0.0848005	0.0665399	0.0109332	0.11207	0.0694566	0.0916526	0.0693449	0.0547472	0.0140505	0.110283
MTMR11	0	0.0197427	0	0	0.00425728	0.0011044	0	0	0.0228076	0.0325521	0.00911438	0.150005	0.012925	0.00460954	0.00140865
MTSS1	0.0375143	0.154748	0.0890072	0.162009	0.0397317	0.05519	0.0464605	0.00803387	0.0568254	0.0858734	0.189435	0.241533	0.12907	0.163018	0.048054
MUC1	0.885887	0.206011	0	0.0262032	0.00422153	0.0111386	0.00394405	0	0	0.0122577	0.00726836	0.00928403	0	0.00989244	0.0140882
MX1	0	0.138783	1.01309	0.174722	0.604945	0.178051	0.366739	0.132919	0.61824	0.575897	0.509044	0.543233	0.147919	0.442597	0.166185
MXD1	0.0832745	0.0693743	0.0835055	0.0704952	0.0540324	0.0372341	0.119136	2.12527	0.165736	0.256184	0.136877	0.502483	0.101672	0.0713936	0.0407952
MXRA8	0.11005	0.171656	0	0.01089	0	0.00487864	0	0	0	0.00447893	0.00947224	0.0116901	0.00341182	0.00519467	0.00102031
MYB	0.456267	0.12499	0.0441259	0.00368302	0.0371545	0.0138109	0.00901687	0	0.0387238	0.0218249	0.00776648	0.0128153	0.419335	0.0150147	0.0122302
MYCT1	0.0414096	0.101916	0	0.00812611	0	0.00118523	0	0	0	0.00230639	0	0.00437973	0	0	0
MYL6	1.10483	1.14068	2.21928	1.3128	1.66821	1.09702	1.2164	1.28069	1.78826	1.64671	1.51058	1.74757	1.32074	0.867543	1.09753
MYLIP	0.0780151	0.29041	0.194962	0.26718	0.355613	0.30625	0.350975	0.371976	0.217388	0.199103	0.132198	0.254764	0.579754	0.325018	0.265134
MYO1G	0.265133	0.240699	0.777716	0.712155	0.396272	0.252054	0.236264	0.0591984	0.218422	0.193484	0.136203	0.599231	0.193868	0.277368	0.346413
MZB1	0	0.00519419	0.285803	0.00241815	0.0269853	0.00391267	0.014498	0.00746893	0.640394	0.0140556	0.00264664	0.0149801	0.0265796	0.115596	0.0188711
NAALADL1	0	0.0211773	0	0.0236429	0.0740186	0.0269319	0.0770857	0	0	0.0255188	0.0119658	0.016978	0.089373	0.0209995	0.0185463
NAGA	0.0346649	0.118435	0.142435	0.0580665	0.122071	0.0580852	0.0979046	0.030972	0.621018	0.589483	0.497353	0.567315	0.0957351	0.0550935	0.0667011
NAMPT	0.0959633	0.255894	0.189862	0.043023	0.354663	0.0595508	0.0533393	2.91655	0.296241	0.814141	0.492378	1.62802	0.335376	0.0766954	0.0925063
NBN	0.251672	0.120046	0.147925	0.0866481	0.122837	0.0928365	0.146273	0.106594	0.0832054	0.129598	0.122106	0.162282	0.213163	0.0902096	0.0893237
NBR1	0.141161	0.19173	0.16167	0.168109	0.297334	0.149339	0.152196	0.237884	0.129408	0.174092	0.20534	0.27267	0.275435	0.12782	0.151496
NCALD	0.161337	0.0407037	0.199655	0.154485	0.0975523	0.0326559	0.118638	0.0202199	0.018273	0.0129882	0.00879032	0.0126726	0	0.00926938	0.0394234
NCAM1	0	0.0553453	0.0835055	0.0736825	0.0338374	0.00209236	0.409877	0.00724763	0	0.00219984	0.000922266	0.00344828	0	0.0129043	0.00973151
NCF2	0	0.11437	0	0.00559769	0.057791	0.0101778	0.0228518	1.33671	0.304371	0.613275	0.432323	1.19418	0.0171694	0.0590699	0.0169059
NCF4	0.0222717	0.120365	0	0.0164867	0.289936	0.0752976	0.0695529	0.82429	0.259107	0.270256	0.316071	0.336792	0.350174	0.171718	0.0680041
NCR3	0	0.0616808	0.123538	0.159643	0.0668518	0.0178401	0.165708	0.00803387	0.152566	0.00290166	0.00232028	0.00704724	0.00463677	0.102676	0.0398041
NDRG2	0.383567	0.187551	0	0.0224984	0.0161952	0.0421239	0.00982498	0	0.108778	0.49144	0.16254	0.0564377	0.475983	0.00494832	0.0348207
NDUFA11	0.418453	0.471326	0.818715	0.37897	0.50047	0.378651	0.35441	0.0857057	0.497539	0.524446	0.451329	0.490161	0.478116	0.247894	0.365234
NDUFA13	0.363459	0.160173	0.404729	0.22548	0.224759	0.15534	0.196788	0.0653633	0.25148	0.286566	0.182987	0.257047	0.200405	0.143076	0.177816
NDUFA3	0.403469	0.315746	0.760664	0.295511	0.318006	0.249079	0.301275	0.096387	0.388086	0.376301	0.278576	0.370734	0.269752	0.215444	0.294098
NDUFB10	0.721062	0.61636	0.851492	0.453354	0.387745	0.272368	0.240308	0.123321	0.573332	0.419373	0.338573	0.478276	0.38739	0.251267	0.329148
NDUFB8	0.319451	0.424977	0.940412	0.437673	0.514123	0.359175	0.392864	0.0709248	0.481178	0.453789	0.393814	0.433108	0.417326	0.362396	0.388086
NDUFV2	0.225167	0.170294	0.504222	0.147584	0.442241	0.241521	0.166985	0.06818	0.519944	0.376304	0.277049	0.290023	0.25183	0.166657	0.198531
NEFL	0	0.00555417	0	0	0	0.0178081	0	0	0	0	0	0	0	0	0.00126683
NEMF	0.387022	0.3373	0.394159	0.179449	0.213813	0.192799	0.138042	0.230221	0.325282	0.245455	0.193335	0.246692	0.336192	0.19715	0.176602
NFE2	0	0.00386759	0	0.00350249	0	0.00207269	0	0.268962	0.0288101	0.0178003	0.0043227	0.053147	0.0634283	0	0
NFKBIZ	0.101229	0.359538	0.129677	0.159768	0.411011	0.385881	0.583746	0.270399	0.460305	0.551924	0.256854	1.00085	1.95361	0.190093	0.240013
NID2	0	0.031939	0.0638201	0.00228217	0	0.00260921	0.0043214	0	0.0685371	0	0.00212283	0.00231165	0.00387913	0	0
NINJ1	0.204562	0.1477	0.125048	0.0724307	0.230973	0.0922251	0.136594	0.958074	0.295419	0.174572	0.463092	0.448274	0.146608	0.0607868	0.0906158
NIPSNAP3B	0	0.00213081	0	0.00552419	0	0.00212537	0	0	0	0.0217747	0.0151202	0.00740055	0.0079885	0.0287895	0.00331181
NKG7	0.165242	0.590264	1.20201	3.13669	0.113891	0.105074	1.74928	0.101991	0.222134	0.104592	0.0791246	0.108424	0.11314	0.0924678	0.969054
NLRP3	0	0.131175	0.0983992	0.00462334	0.0154168	0.0760805	0.0356262	0.104743	0.119918	0.770431	0.355503	0.775439	0.102526	0.0262447	0.044487
NME1	0.053208	0.0450613	0.0441259	0.0361251	0.100068	0.0265085	0.0645959	0	0.121656	0.0927596	0.0831156	0.0971505	0.0475558	0.0399694	0.0304966
NME8	0	0.00400459	0	0.0254917	0	0.00168401	0.00559181	0.0129527	0.0495903	0.0175367	0.00715559	0.00621463	0.0350355	0	0.000903786
NOD2	0.0553395	0.00296343	0	0.00939301	0.0141637	0.0137483	0.0457678	0.0992617	0.0288101	0.074571	0.0446186	0.0967593	0.00275282	0.00352288	0.0167788
NOP10	0.462479	0.356134	0.942093	0.386326	0.701126	0.279973	0.315491	0.481079	0.672382	0.668307	0.692443	0.779393	0.296595	0.305219	0.324561
NOS3	0	0.0374451	0	0.0082936	0.00631204	0.00939122	0.00549665	0	0	0	0.0053729	0.00184994	0.0289043	0	0.00559974
NOTCH4	0	0.0635239	0	0.00881841	0	0	0.00498231	0.00891875	0.155605	0.0145812	0.0140232	0.0381433	0.0225797	0.009691	0.00302124
NOV	0.0368889	0.0189981	0	0.00252458	0	0.00123749	0	0.00989344	0	0.00614237	0.0146583	0.002072	0.0480029	0	0.00238497
NPDC1	0.0764206	0.347759	0	0.0465263	0.0468392	0.0554683	0.0205256	0.0118356	0.0449064	0.0437962	0.0212467	0.0381053	0.0211677	0.00414224	0.0295139
NPEPPS	0.404095	0.205364	0.135121	0.140827	0.118645	0.106633	0.133866	0.249851	0.187864	0.211532	0.185268	0.169571	0.254011	0.0617246	0.123494
NPIPB15	0.0427445	0.0594038	0	0.0155004	0.00545704	0.0194289	0	0	0	0.00515736	0.0154905	0.0113428	0.049171	0.0105808	0.0165612
NPL	0.0824816	0.0599723	0.0630524	0.0199036	0.0359569	0.019221	0.0165131	0.162175	0.119421	0.0840168	0.463616	0.292989	0.013655	0.0328111	0.0340022
NR2E3	0	0.00194881	0	0	0	0	0	0	0	0	0	0	0	0	0.000880502
NR4A2	0.358842	0.51903	0.341821	0.520703	0.243788	0.400856	0.708652	0.220665	0.621874	1.17659	0.604412	0.979256	1.47639	0.672407	0.529082
NR4A3	0.0784792	0.085585	0	0.0292591	0.0714789	0.0313265	0.085216	0.0351407	0.317984	0.481824	0.192184	0.213417	0.398873	0.0434457	0.040378
NRG1	0	0.00286036	0	0.0042945	0	0.000762659	0	0	0	0.0366025	0.00891023	0.103374	0	0	0.000559569
NRGN	0	0.0300159	0.0631736	0	0	0.00963997	0.00643183	0	0.0704186	0.123855	0.0994422	0.36276	0.00771029	0.00889012	0.00296659
NTRK1	0	0.00213081	0	0.00327709	0.0384159	0	0.00385553	0	0	0.00660717	0.00177381	0.00728404	0.398597	0.0103205	0.00210238
NUDT1	0.169748	0.189011	1.22697	0.113264	0.190953	0.0861756	0.0754646	0.0215634	0.247018	0.229566	0.149801	0.200362	0.200368	0.0949031	0.109551
NUDT18	0.0621837	0.0252508	0.060593	0.0459426	0.024229	0.0244187	0.051934	0	0.0217469	0.0424789	0.0356631	0.0546239	0.0280133	0.0505678	0.0241143
NXT1	0.140503	0.0536706	0.0686282	0.0578226	0.0938866	0.0844427	0.0801991	0.0111098	0.0217469	0.0943282	0.0648985	0.0978743	0.125914	0.0726905	0.0717305
NXT2	0.108919	0.0179674	0	0.027409	0.0364191	0.0197837	0.0343016	0.00442594	0.09951	0.0451576	0.0398502	0.0416249	0.0322155	0.0574442	0.0268569
OAS1	0.120209	0.116729	0.433913	0.0769848	0.531614	0.0805257	0.178859	0.0709442	0.208099	0.361991	0.417049	0.560852	0.0865339	0.138936	0.0688589
OCIAD2	0.107293	0.229795	0.385461	0.217628	0.43395	0.361474	0.282416	0.0251512	0.166503	0.0441718	0.0451078	0.0348386	0.0984122	0.173728	0.370828
OLFM1	0.0472173	0.132096	0	0.0111549	0.00404303	0.0010508	0	0	0.0548061	0.0667171	0.0056705	0.0640824	0.0384739	0.00464583	0.00167483
OLFML2B	0	0.0739713	0	0.00535996	0	0.00455782	0.0048581	0	0.0206506	0.111361	0.228682	0.0739986	0	0.00884772	0.00179406
OLFML3	0.084797	0.119312	0	0.0129455	0.0033679	0.00622984	0.00446957	0	0.0422205	0.0277514	0.250218	0.0213161	0	0.0083449	0.0149718
OLR1	0	0.0504851	0.0441259	0.0253095	0.0474795	0.0244955	0.0331273	0.0830826	0.327489	0.321484	0.543258	0.329921	0.0186887	0.0130959	0.034592
ORC1	0	0.00708477	0.149934	0.0053858	0	0.00147909	0	0	0	0.0059609	0.00692336	0.00204257	0.0197244	0.00921224	0.00341197
OSBPL10	0.0841607	0.0174345	0	0.00254694	0	0.00123351	0	0	0	0	0.00645968	0.00193533	0.00373123	0.315494	0.00143633
OSM	0	0.0788483	0.176118	0.10919	0.0691774	0.093875	0.117292	0.735851	0	0.247034	0.164465	0.542961	0.19125	0.0304857	0.0601137
OTUB1	0.198081	0.232679	0.313819	0.212913	0.259643	0.154378	0.156368	0.0872865	0.363172	0.283811	0.197721	0.347464	0.242355	0.137442	0.190425
OTUD5	0.272087	0.315577	0.420583	0.238231	0.419124	0.197452	0.290135	0.219787	0.20097	0.222968	0.162288	0.205171	0.241822	0.205656	0.217505
P2RX1	0	0.0531956	0	0.00283864	0.00287853	0.00127451	0.00418342	0.0810401	0.119275	0.049384	0.0370552	0.138032	0.898384	0.00286181	0.0027288
P2RX5	0	0.0651599	0.0619289	0.0181434	0.0855326	0.0508202	0.0552697	0.0122868	0.126499	0.0368302	0.00942589	0.0410164	0.0136278	0.42782	0.0484182
P2RY10	0.085443	0.0281194	0.169628	0.0339185	0.253411	0.0924232	0.0679354	0	0	0.0218892	0.00723187	0.00285055	0.0333237	0.190133	0.0850488
P2RY13	0.0486517	0.0719748	0	0	0.0129877	0.00723969	0.00376139	0.284676	0.0206506	0.224691	0.246811	0.323096	0.00372003	0.0178624	0.00550167
P2RY14	0	0.0221293	0	0.00300865	0.019571	0.0121864	0.0358629	0.0107325	0.604041	0.236362	0.0322844	0.00780991	0.183431	0.0550898	0.00337299
P2RY2	0	0.00327228	0	0	0	0	0	0	0	0.00489068	0.00395493	0.0462257	0.00470847	0	0.00065568
PADI4	0	0.00346447	0	0.00505415	0	0	0.030428	0.325122	0.0485391	0.00437469	0.00213826	0.0923633	0.0301886	0.00558387	0.000977564
PAIP2	0.357399	0.485312	0.781941	0.419174	0.565128	0.35103	0.448562	0.532664	0.334255	0.55856	0.413714	0.583122	0.435203	0.368457	0.409804
PALLD	0.315914	0.144082	0	0.0729862	0.0133273	0.00626505	0.0204453	0.0260432	0.06936	0.157903	0.0840551	0.103979	0.168281	0.00996539	0.00925861
PANX1	0	0.0198328	0.157511	0.0149078	0.026603	0.0176369	0.026981	0.0139733	0	0.0391139	0.0407955	0.0376955	0.0159517	0.0101104	0.029738
PAPSS2	0.114066	0.108171	0	0.0080779	0.00307636	0.00453274	0.00435788	0	0.165399	0.236546	0.169647	0.279327	0.0716546	0.00565238	0.00333079
PAQR5	0	0.00739427	0	0	0	0.00174657	0.00822056	0	0	0.0116771	0.0645262	0.00489198	0.43911	0.0139456	0.00453458
PARK7	0.744887	0.626777	1.23278	0.552427	0.848361	0.412146	0.553819	0.137042	1.68859	0.734768	0.507978	0.714933	0.443124	0.371257	0.448029
PASK	0.0433873	0.0619211	0.0619289	0.0204974	0.0731774	0.109788	0.0257529	0.0356483	0	0.0110184	0.0197175	0.0141707	0.053072	0.0249765	0.0395097
PAX5	0	0.0150639	0	0	0	0	0.00389073	0	0	0	0.0025239	0.00350464	0	0.621714	0
PBXIP1	0.316609	0.461332	0.592434	0.282568	1.15466	0.908894	0.4716	0.315404	0.20168	0.198695	0.185345	0.22643	0.356833	0.322793	0.594159
PCGF2	0.128101	0.0794194	0	0.00588798	0	0.00410941	0	0.0127629	0	0.00566611	0.00542447	0.00949839	0.00935237	0.00970697	0.00175877
PCOLCE	0.0432887	0.279105	0	0.0236686	0	0.0100229	0.0127313	0	0	0.014383	0.0138316	0.0103997	0.0295679	0.0147926	0.00664809
PCSK5	0	0.0525845	0	0.0252724	0.00587399	0.0230647	0	0.011856	0	0.0321951	0.0381617	0.107419	0.0190692	0	0.00659251
PDCD1	0.114163	0.0882929	0.260373	0.0816861	0.229457	0.121334	0.0103758	0.00917879	0	0.014977	0.0154411	0.0112738	0	0	0.244187
PDCD1LG2	0	0.0104169	0	0	0.0205987	0.00233267	0.00465487	0	0	0.018398	0.0377604	0.0111877	0.0306972	0	0.000877216
PDE2A	0.0414096	0.0987237	0	0.00576382	0.00419309	0	0	0	0	0.00344683	0.0157929	0.00597137	0.0211815	0	0.00162582
PDGFA	0	0.0152635	0	0	0.0227075	0	0.00502656	0	0.0283781	0	0.0135939	0	0.0208297	0	0.00231231
PDGFB	0.065659	0.0887548	0	0.0114838	0.019407	0.0177419	0	0	0.0206506	0.0925222	0.152579	0.00171849	0	0	0.0244733
PDGFD	0	0.0735313	0	0.106089	0.00358303	0.00328653	0.0742817	0	0.0407089	0.0094127	0.00509341	0.00638351	0.0114133	0.00451658	0.018707
PDGFRA	0.0957861	0.171805	0	0	0	0.00215147	0.00446957	0	0	0.00495129	0.00966773	0.00281851	0.0104401	0	0.000984207
PDGFRB	0	0.253363	0	0.148159	0	0.00578243	0.00954558	0	0.0556176	0.0187322	0.0111747	0.0165761	0.00422773	0.00585772	0.00780165
PDGFRL	0.0414096	0.0956018	0	0.0027336	0	0.00384838	0.00562321	0.0175631	0	0.00691987	0.00804081	0.00232903	0.00826358	0	0.000887938
PDIA6	0.46648	0.314335	0.720007	0.383275	0.435718	0.297988	0.256626	0.04054	0.567939	0.52493	0.597791	0.587644	0.454171	0.238239	0.283616
PDK1	0	0.0243828	0	0.0290275	0.057677	0.0356317	0.0361333	0.176766	0.113363	0.0302121	0.0389314	0.0575346	0.0320747	0.0347236	0.0333832
PDK4	0.316597	0.657459	0.0638201	0.0616998	0.0416794	0.049125	0.053861	0.0538894	0.150422	1.02792	1.17509	0.529506	0.0797034	0.0186154	0.043137
PDPN	0	0.0941263	0	0.00392554	0	0.000776207	0	0	0.0180729	0.00283968	0.050997	0.00314778	0.00902501	0	0.00352991
PEBP1	1.41983	1.25719	0.637187	0.45416	0.823634	0.764639	0.458572	0.0869459	0.929857	0.765116	0.75091	0.406906	1.61807	0.663468	0.637675
PECAM1	0.11527	0.670072	0.0631736	0.16094	0.0557474	0.0576116	0.225369	1.13449	0.620968	0.647596	0.710779	1.30996	0.0721412	0.10929	0.176806
PELI1	0.190629	0.14697	0.137852	0.0631642	0.457404	0.102642	0.0890298	1.24301	0.0412904	0.297285	0.316855	0.79185	0.235766	0.275493	0.0736178
PGK1	0.655199	0.836375	1.19155	0.734654	1.00598	0.750731	0.650301	0.941156	1.16836	1.16279	1.05766	1.58897	0.773675	0.592445	0.740161
PHEX	0.0291384	0	0	0	0.00398894	0.000953762	0.00503512	0	0.10628	0	0.000618876	0	0	0	0.00103617
PHLDA1	0.349777	0.302522	1.08858	0.142634	0.898658	0.376857	0.403636	0.0540332	0.232609	0.216645	0.362983	0.15188	0.163261	0.0773031	0.302193
PHTF2	0.0485506	0.0995498	0.406742	0.0343683	0.277745	0.108605	0.0731573	0.0261274	0.1031	0.100003	0.0769278	0.138098	0.284146	0.115979	0.0955605
PI3	0.264917	0.00914968	0	0	0	0.00084154	0.0034463	0.285984	0	0.00482306	0.000661515	0	0.00540976	0	0.000717017
PIEZO1	0.463335	0.366732	0.247744	0.213672	0.2617	0.213212	0.162775	0.0235117	0.0590644	0.21328	0.203252	0.290678	0.109739	0.106514	0.224304
PIK3CG	0.0591605	0.040341	0.0543466	0.0505965	0.0622234	0.023039	0.0885874	0.114223	0.150906	0.0721056	0.0518313	0.103588	0.114083	0.0256066	0.0387842
PIK3IP1	0.337771	0.884541	0.531362	0.555347	1.05928	1.25273	0.734337	0.105003	0.190239	0.186431	0.351951	0.183416	0.33928	0.560744	1.00019
PILRA	0	0.101398	0.105808	0.0104401	0.0306006	0.0121162	0.0114662	0.626595	0.094911	0.360404	0.386771	0.934893	0.0286937	0.0325839	0.0180938
PIM2	0.157286	0.290032	0.358928	0.234283	0.987803	0.414719	0.418446	0.270977	0.369031	0.148249	0.0765906	0.108894	0.549254	0.360756	0.222328
PIP4K2C	0.170917	0.148298	0.150763	0.0563355	0.075949	0.061563	0.0929009	0.0320646	0	0.0463602	0.0650436	0.0514939	0.113668	0.0316363	0.0855567
PKP4	0.172126	0.12951	0.0603073	0.0219427	0.0194738	0.0367596	0.0178884	0	0	0.0379065	0.0228927	0.0118907	0.0730224	0	0.0275943
PLA1A	0	0.0253218	0	0.00605874	0	0.00360365	0	0	0	0.0154148	0.00496755	0	0.0087223	0	0.000892109
PLA2G4C	0	0.0265703	0	0.00276708	0.0389464	0.00274123	0.0105574	0	0.0400199	0.0344413	0.0413791	0.0186461	0.00650933	0.0260555	0.00198851
PLA2G7	0.0329126	0.0204145	0	0.00250634	0.00566709	0.00804455	0.00625868	0.0119022	0.114766	0.0916872	0.281965	0.110515	0.0078931	0.0285564	0.0147365
PLAC9	0.0375143	0.139208	0	0.00567701	0	0.00506173	0.00842124	0	0	0.00706644	0.00904094	0.00352457	0.00434144	0	0.005729
PLAT	0.639439	0.306103	0	0.0202553	0.00794217	0.00922004	0.0043131	0	0	0.00596591	0.00948498	0.00547341	0.490293	0	0.00641549
PLAUR	0.0634272	0.225321	0.280515	0.0634654	0.0820266	0.077807	0.111563	1.19556	0.460862	1.00647	0.833963	1.52118	0.920774	0.0941513	0.0703136
PLBD1	0.0629957	0.127765	0.0433223	0.0169539	0.00846923	0.00781678	0.0112028	0.252997	0.134521	0.355884	0.431313	0.612035	0.00301246	0.0454266	0.0193148
PLCG2	0	0.124794	0.105808	0.0720376	0.025692	0.00810454	0.260604	0.20964	0.0680119	0.179635	0.166251	0.207577	0.468536	0.542126	0.0582715
PLCH2	0.0791319	0.076192	0.09649	0.0384273	0.0481464	0.0259181	0.171885	0	0	0.00932023	0.00105348	0.00537291	0	0.00915223	0.0728829
PLD3	0.318488	0.383344	0.406476	0.162831	0.191314	0.194347	0.275754	0.122068	0.422725	0.52437	1.58558	0.612167	0.436449	0.167023	0.178196
PLEKHF1	0	0.0716584	0.180894	0.139185	0.126541	0.0842186	0.0959911	0	0	0.0153331	0.0189477	0.00533983	0.00564822	0.0338308	0.148552
PLEKHG3	0	0.138399	0	0.350866	0.0158377	0.0637268	0.0596042	0.213119	0	0.0129079	0.0258011	0.0443768	0.0992957	0.00758962	0.0226457
PLIN2	0.273823	0.572839	0.202665	0.211249	0.288153	0.215999	0.169979	0.278043	0.433192	0.66962	0.937351	0.911345	1.41032	0.12795	0.190057
PLP2	0.482987	0.61793	1.57479	0.246421	0.985963	0.888264	0.525014	0.384092	1.18431	0.61027	0.443432	0.823878	0.713702	0.694995	0.775926
PLVAP	0	0.248101	0	0.0138183	0.00449677	0.0077979	0	0.0128535	0.184647	0.0125488	0.0498172	0.0288425	0.0384898	0.0166454	0.00398429
PMAIP1	0.0553395	0.0999475	0.306395	0.140156	0.929476	0.125742	0.225981	0.0704276	0.353007	0.401103	0.119537	0.221242	0.0861902	0.277361	0.181924
PMCH	0	0	0	0	0.175533	0.00555417	0.005694	0	0	0.00313572	0.0013659	0	0	0.00916634	0.00205833
PNOC	0	0.00694406	0	0	0	0.00267584	0.00465487	0	0.0875018	0.00249292	0.00139653	0	0	0.155462	0
PODN	0.0639054	0.21429	0	0.0457942	0	0	0.00470162	0	0	0.00459021	0.00126051	0	0	0.0052516	0.00219965
PODXL	0.149206	0.171871	0	0.0153873	0.00347336	0.00553737	0	0	0	0.0115492	0.00397694	0.00508935	0.0195277	0.00929182	0.00438693
POU2AF1	0	0.0490482	0	0.00261248	0.0386568	0.00748012	0.00915499	0.0253336	0	0.0181396	0.00702735	0.0167832	0.027466	0.942262	0.0085075
POU2F2	0.332815	0.397651	0.22428	0.161229	0.494475	0.256273	0.0870776	0.161408	0.297974	0.763769	0.514291	1.35466	0.187829	1.32959	0.166291
PPA1	0.641974	0.282732	0.581189	0.165296	0.375804	0.27844	0.0982745	0.0649045	0.248465	0.561806	0.183989	0.317965	0.0624791	0.136338	0.198746
PPFIBP1	0.154628	0.164523	0	0.0200659	0.00831771	0.0100221	0.02555	0	0.0407914	0.0337903	0.0146246	0.00823165	0.0327552	0.0053769	0.011818
PPM1F	0.0911421	0.103994	0	0.0835145	0.0525985	0.0524562	0.0705209	0.378124	0.155017	0.19954	0.0964009	0.295769	0.0718129	0.0361658	0.0476663
PPM1H	0	0.00794693	0	0	0	0.00228895	0.0064548	0	0.0387238	0.0125845	0.0193768	0.0104749	0.433566	0.0088325	0.00259695
PPP2R1A	0.645185	0.464999	0.509168	0.533489	0.461329	0.431519	0.56753	0.133633	0.355016	0.518404	0.454841	0.618281	0.378692	0.40802	0.40105
PRCP	0.218787	0.422535	0.0631736	0.11692	0.140558	0.11879	0.113544	0.162958	0.348685	0.693254	0.533527	0.526163	0.117134	0.160324	0.0941526
PRDM1	0.517779	0.813893	1.11894	1.21191	1.47459	1.06684	0.532631	0.0899229	0.192146	0.301512	0.311994	0.238133	0.0668617	0.241098	1.08359
PRDX3	0.205904	0.224898	0.693218	0.145063	0.228577	0.0968447	0.145248	0.0600954	0.31605	0.413089	0.412863	0.412079	0.279859	0.100951	0.152956
PRDX5	0.0463532	0.0936956	0.389273	0.106851	0.129658	0.0895399	0.166184	0.16933	0.125932	0.10478	0.131851	0.109391	0.0960905	0.0940909	0.0951705
PRDX6	0.410163	0.383993	0.693427	0.299436	0.380909	0.238312	0.296621	0.0854676	0.39501	0.429878	0.371427	0.426243	1.23163	0.156712	0.284649
PRELP	0.0336762	0.08959	0	0.00775494	0	0.00453513	0.01401	0	0	0.00432732	0.00215872	0	0.00490893	0	0.00257051
PRF1	0.509761	0.816008	0.963446	3.12568	0.422432	0.217047	1.51549	0.137492	0.0387238	0.0933453	0.0773176	0.0815271	0.0502333	0.0670008	0.919177
PRKCDBP	0	0.0925042	0.101835	0.00531465	0.103769	0.00208618	0	0	0	0.0189248	0.031062	0.00447805	0	0.00894724	0.00203318
PRKCQ	0.0981198	0.136952	0.137756	0.199517	0.148184	0.133736	0.124408	0.0099457	0	0.0173997	0.0115258	0.00323406	0.0255294	0.0190145	0.129033
PRNP	0.233367	0.252616	0.253307	0.251087	0.343279	0.243973	0.229255	0.0882077	0.271034	0.332536	0.370219	0.31457	0.712094	0.122207	0.282748
PROM1	0.131971	0.00761096	0	0	0	0	0.00549524	0	0	0	0.000904687	0	0.0308462	0	0.000848844
PRR5	0.0553149	0.112498	0.13471	0.170781	0.129494	0.103382	0.137848	0.0553225	0.0353513	0.0182006	0.0463951	0.0490116	0.0872132	0.0339197	0.135085
PRR5L	0	0.0499994	0	0.145909	0.0220956	0.0349423	0.0667423	0.0593626	0.0909885	0.0248639	0.0395914	0.025035	0.0445422	0.0134174	0.0603063
PRRX1	0	0.132169	0	0.0112957	0	0.00312156	0	0	0	0.00507489	0.0111226	0	0.0109342	0	0.00275149
PSAT1	0	0.00343562	0	0.0166269	0.017971	0.00967661	0.0085886	0	0	0	0.00389555	0	0	0.00830743	0.020022
PSMA1	0.21524	0.244801	0.86363	0.183976	0.250628	0.216638	0.229767	0.0821122	0.424539	0.378145	0.296373	0.356679	0.334764	0.131288	0.227889
PSMA5	0.176973	0.223262	0.538979	0.261319	0.283144	0.170053	0.244312	0.0473521	0.377516	0.375439	0.242033	0.31327	0.255448	0.12074	0.245518
PSMB1	0.457356	0.625877	0.775088	0.481063	0.680111	0.368857	0.515628	0.355612	0.637433	0.685894	0.541218	0.683386	0.458545	0.343384	0.416202
PSMB3	0.138138	0.262108	0.694301	0.209036	0.469628	0.193456	0.191389	0.224643	0.528567	0.443661	0.328828	0.559266	0.210129	0.209368	0.243758
PSMD2	0.34529	0.221112	0.685419	0.216983	0.335499	0.184661	0.180457	0.0690743	0.540732	0.326038	0.33461	0.311671	0.221427	0.107162	0.188751
PTAFR	0.115371	0.196888	0.0456849	0.00549721	0.0128651	0.0100899	0.0238381	1.03545	0.174334	0.816705	0.799222	0.835425	0.525831	0.148109	0.0248991
PTGDR	0	0.0773885	0.0542733	0.231837	0.0208107	0.049201	0.245944	0.0214202	0	0.0123722	0.0110077	0.00441533	0.00470847	0.00844742	0.125552
PTGER2	0.129103	0.153628	0.100292	0.252846	0.0485036	0.177743	0.167538	0.0143716	0.0283781	0.0743928	0.108865	0.212497	0.0978367	0	0.15427
PTGIR	0.0329126	0.0223236	0.0835055	0.00562947	0.0740445	0.00332626	0	0	0	0.0679098	0.0232378	0.0896785	0	0	0.00185119
PTGIS	0	0.085898	0	0.00300027	0	0.00233194	0	0	0	0	0.0041589	0.00473924	0.0116578	0	0.00234079
PTGS1	0	0.0659897	0	0	0.0347585	0.00745737	0	0.0393642	0.165863	0.185322	0.300793	0.107786	1.39379	0.0505397	0.0150238
PTPN1	0.292664	0.346237	0.286048	0.249009	0.365604	0.24537	0.216348	0.104593	0.41855	0.419569	0.194938	0.32082	0.26771	0.436042	0.232873
PTPN13	0	0.0459703	0	0	0.017273	0.067355	0.010388	0	0	0.0070099	0.00822036	0.0409505	0	0	0.00541218
PTPN7	0.0791319	0.214622	0.989515	0.409334	0.727468	0.312527	0.408503	0.225318	0.197587	0.161266	0.0982688	0.157706	0.558531	0.121115	0.426946
PTPRB	0.0834786	0.140201	0	0.00528647	0	0.000789248	0.00640597	0	0	0.00507866	0.00356941	0.0054515	0.0599467	0.00579804	0.00617794
PTPRG	0.074863	0.0655378	0	0.00270832	0.00587863	0.00105694	0	0	0.0206506	0	0.00106571	0	0	0.00453279	0
PTPRK	0.26643	0.0661198	0	0	0	0.00700827	0.00458963	0	0	0.00614179	0.0041968	0.00281851	0	0.0569799	0.00962192
PTTG1	0	0.0124119	0.719631	0.0588824	0.206078	0.0171998	0.0185384	0	0.0633547	0.0488408	0.0378239	0.0196457	0.0319656	0.0171341	0.0590663
PYHIN1	0.107761	0.117277	0.675421	0.456617	0.286863	0.185758	0.281451	0.0311742	0.0531602	0.0281536	0.0323525	0.0325856	0.0108352	0.0907886	0.295942
QPCT	0	0.0315695	0	0.00112284	0.0327558	0.0217011	0.0130225	0.291491	0.0877805	0.13901	0.0631863	0.188356	0.13751	0.0212636	0.0247876
QPRT	0	0.0247387	0	0.00181911	0.0154555	0.00362863	0.0153132	0	0	0.0440115	0.0728345	0.0239253	0.0633701	0.00455741	0.00255247
RAB20	0.0556694	0.0490004	0	0.0106866	0.0155987	0.0115821	0.0118953	0.0672041	0.113844	0.201887	0.338037	0.439455	0.141035	0.0407801	0.0189845
RAB27B	0.0409245	0.0759442	0	0.0501412	0	0.027978	0.0581025	0	0.0407089	0.00720358	0.00219071	0.00252175	0.755913	0	0.0253546
RAB9A	0.240285	0.104725	0	0.180017	0.208084	0.0886851	0.1421	0.0203139	0.0589819	0.0910188	0.101098	0.0718341	0.108128	0.0639578	0.105991
RAC2	0.557032	1.20689	2.64204	2.01024	1.93245	1.56295	1.5378	1.44097	0.838849	0.748989	0.605314	1.17566	2.41305	1.59204	1.65938
RAI14	0	0.0810258	0	0.00236638	0	0.00588618	0	0	0.0245234	0.00613052	0.0172267	0.00675249	0.0659696	0.00550624	0.00184894
RALGPS2	0.240062	0.0762957	0	0.00557021	0	0.0150952	0.0271656	0.0207802	0.065166	0.0220514	0.0179039	0.0452994	0.0403763	0.730865	0.0101509
RAMP1	0.0892441	0.0197056	0	0.0187046	0.00532976	0.00117832	0.0454953	0	0.0319358	0.0250175	0.0128053	0	0	0	0.000298793
RAMP2	0.141882	0.224376	0	0.00274927	0.0041605	0.0044096	0.00546742	0	0.0407914	0	0.00531697	0.00640967	0.00295337	0	0.00604843
RAMP3	0	0.253169	0	0.00291679	0	0.00219876	0	0	0	0.00504185	0.00372065	0.00268358	0.00448184	0	0.00756576
RAP1A	0.307192	0.463691	1.04708	0.512011	0.910189	0.540575	0.417491	0.641044	0.584753	0.775272	0.654803	0.796692	0.548806	0.400653	0.561387
RARRES2	0	0.0914572	0	0.00542443	0	0	0	0	0	0.00652272	0.00174179	0.00877575	0	0	0.00627225
RASA3	0.0996091	0.371999	0.131294	0.475929	0.171189	0.248957	0.18968	0.0517212	0.25876	0.115872	0.176194	0.238852	0.294082	0.137732	0.153969
RASA4	0	0.00336444	0	0.00323898	0	0.00339732	0.00526448	0	0	0.0154397	0.00756018	0.00852046	0	0.00393931	0.0012629
RASGRP2	0.128428	0.282051	0.12043	0.354455	0.110786	0.345407	0.120887	0.172563	0.558816	0.157357	0.0497967	0.328962	0.12482	0.62625	0.175187
RASGRP3	0.0222717	0.0627553	0.0835055	0.0199738	0.0120412	0.017872	0.00982789	0.0262056	0	0.0590158	0.0914577	0.0221473	0.0597018	0.175471	0.0197775
RASSF4	0.0655603	0.12551	0	0.0754584	0.0329493	0.00821513	0.0201626	0	0.225166	0.492387	0.378228	0.41707	0.0181625	0.0305389	0.0204007
RBP1	0.0421146	0.0203691	0	0	0	0.00193107	0.00575145	0.00442594	0	0	0.0223795	0	0.00743978	0	0.00109481
RCAN3	0.226673	0.231438	0.183357	0.074292	0.443076	0.466807	0.212027	0.0383664	0.327085	0.0923086	0.0912893	0.0885859	0.098451	0.143531	0.322995
RCN3	0	0.0150824	0	0.00271818	0.00517431	0	0	0	0	0.0179515	0.0176186	0.00583557	0	0	0.00181515
REC8	0	0.0271986	0.0610209	0.0324978	0.075757	0.0274643	0.0928142	0.0265171	0.123889	0.0882803	0.0237834	0.0370861	0.104693	0.0275114	0.0433433
RENBP	0	0.0456832	0	0.00255756	0.00442107	0.00845605	0	0.0364332	0.0640912	0.0420919	0.0813649	0.0603912	0.367151	0.0188618	0.00734326
REPS2	0	0.0172161	0	0.00274927	0	0.00309769	0.00171433	0.101459	0.0908338	0.0451897	0.0343791	0.0331813	0.020795	0	0.00427926
RETN	0	0.0086357	0.09649	0	0.0107218	0.00523901	0	0.0149307	0.0228076	0.112333	0.127383	0.456622	0.00452521	0.0141207	0.00786971
RFK	0.0291384	0.0580053	0.0835055	0.0637323	0.10677	0.042394	0.0337445	0.0201056	0.0180729	0.0860422	0.0710842	0.125312	0.061068	0.0342681	0.0530044
RGL2	0.267073	0.268264	0.123538	0.104241	0.137021	0.0919478	0.137148	0.39602	0.171722	0.137361	0.191842	0.116462	0.231812	0.0751801	0.100264
RGS1	0.800162	1.18556	2.42481	0.622275	2.8473	1.39526	1.50214	0.294035	1.95163	2.11611	2.08793	0.928348	3.89164	1.16302	1.89427
RGS13	0	0.0504836	0	0	0.0158447	0.00480068	0	0.0212744	0.104054	0.0178637	0.0115433	0.028853	1.33283	0.0177477	0.00284054
RGS16	0	0.198167	0	0.0345119	0.123379	0.0743944	0.154316	0	0.0632472	0.029992	0.057471	0.0322695	0.206258	0.0956282	0.0686883
RGS5	0	0.115845	0	0.00192697	0.0286033	0	0.00499903	0.0129527	0	0.00761844	0.00975425	0.00426753	0.0315461	0	0.00475307
RHOC	0.413226	0.35377	0.223647	0.207111	0.390866	0.181013	0.25255	0.0537667	0.183993	0.42558	0.324913	0.437305	0.165364	0.0532768	0.239305
RHOF	0.0452656	0.196672	0.622293	0.405171	0.451445	0.348825	0.3062	0.0707769	0.201634	0.185688	0.061117	0.145896	0.186486	0.167539	0.382723
RHOJ	0	0.109825	0	0.00853751	0.00705511	0.00308074	0	0.00442594	0	0.00262386	0.00289575	0	0.0584653	0	0.00188047
RNASE1	0.0222717	0.498983	0.218715	0.0322702	0.0850574	0.0333472	0.0607981	0.048316	0.232552	0.292182	1.18164	0.217541	0.0618467	0.109623	0.0313466
RNASE2	0	0.0120595	0	0	0	0.000888499	0.00874456	0.00821514	0.0217469	0.0872064	0.0643819	0.250618	0.0036938	0.00837533	0.00330857
RNASE6	0	0.142104	0	0.0071447	0.0528805	0.0282671	0.0392316	0.0896679	0.990919	0.902899	0.575342	0.565812	0.0214206	0.262421	0.0243155
RNF122	0.0562075	0.0347168	0.213328	0.034755	0.0266746	0.0255041	0.0995519	0.0617558	0.202026	0.0837958	0.102081	0.160306	0.0149972	0.0638363	0.0430478
RNF144B	0.0222717	0.0899081	0	0.00744814	0.00834722	0.00993259	0.0199613	0.0654274	0.232289	0.407289	0.208649	0.568875	0.00717386	0.0627583	0.012118
RNF213	0.329384	0.576483	0.447331	0.858437	0.728635	0.547372	0.503282	0.463109	0.544768	0.533344	0.456117	0.644464	0.363348	0.297757	0.579236
ROBO4	0.126978	0.31243	0	0.0117408	0	0.0035955	0	0	0	0.0495376	0.0228419	0.0200866	0.0126495	0.0111357	0.00575513
RRAS	0.143677	0.134977	0.060593	0.0337333	0.0354686	0.0523702	0.0268916	0.0123614	0.0465525	0.0795212	0.152864	0.328737	0.0889789	0.0214306	0.0564406
RRP12	0.0401374	0.0522141	0.09649	0.0314386	0.0247389	0.0125236	0.00843025	0.0682169	0.11227	0.0667313	0.0496177	0.175735	0.0346921	0.028667	0.0126698
RRP9	0	0.0302554	0	0.0132899	0.0341381	0.0232727	0.0110478	0.0106831	0.020633	0.0330981	0.0164503	0.0214858	0.0247794	0.0394077	0.0162181
RSAD2	0	0.0231165	0.371982	0.0259589	0.241703	0.0582883	0.183759	0.143453	0.173536	0.22426	0.131116	0.2433	0.284238	0.0886963	0.07904
RTKN2	0	0.0133335	0	0.00350632	0.35033	0.0357207	0.00765455	0	0	0.00163745	0.000480683	0.00663434	0.00271783	0.00420311	0.00623708
RYR1	0	0.0104045	0	0	0.0104421	0.00872672	0.00889214	0.00917879	0.0313912	0.0354513	0.0186726	0.0227619	0.016686	0.00428447	0.0162878
S100A12	0	0.0237776	0	0.00219182	0.00504117	0.00279447	0	0.93984	0.0520464	0.0664877	0.0131959	0.69744	0.0155388	0.00462326	0.0046195
S100A4	1.09349	1.74486	2.03159	2.49942	2.6523	2.14496	1.17247	1.48434	1.40076	1.93281	1.50786	2.87452	1.85454	0.573638	1.85166
S100A6	2.02313	2.438	2.08615	2.11266	2.14659	1.86896	1.10935	2.04308	2.27775	2.50871	1.86578	3.04883	2.56717	0.934124	1.91572
S100A9	0.3264	0.31294	0.0835055	0.0275345	0.0378487	0.0461765	0.0563753	4.30795	0.330925	0.643153	0.569928	2.83293	0.138849	0.0714489	0.0710621
S100B	0.0291384	0.00909045	0	0.109757	0	0.0121082	0.071124	0.0325615	0	0.0708702	0.0132003	0.015294	0.00802024	0.0106092	0.023605
S100P	0	0.0042091	0	0.00922061	0.00993067	0.00392987	0	0.841745	0.0288101	0	0.00378548	0.0199411	0.00279314	0	0.00761957
S1PR1	0	0.30753	0	0.255693	0.055254	0.142136	0.0579704	0.00740551	0.0407914	0.0296776	0.0339495	0.0198462	0.13169	0.149357	0.0795933
S1PR5	0.0367103	0.0439814	0	0.582783	0.00963776	0.00101901	0.0578747	0.0118816	0	0.00262945	0.00293062	0.00603224	0.00489982	0.00446892	0.0298942
SAMD9	0.0680794	0.123811	0.144526	0.194875	0.27888	0.157098	0.190936	0.131287	0.061531	0.189387	0.127906	0.206165	0.170387	0.183768	0.148737
SAMSN1	0.307898	0.254498	0.326235	0.225989	0.552477	0.30712	0.298049	0.736422	0.242068	0.476612	0.330186	1.1504	1.90232	0.252787	0.351293
SAT1	0.8671	0.908418	0.992181	0.400507	1.13072	0.46233	0.518737	3.21845	1.02279	1.91751	2.14269	2.86375	2.08229	0.815875	0.428176
SCARA3	0	0.0211619	0	0	0	0.0012231	0	0	0	0	0.000764537	0	0.00672954	0	0.00282917
SCN9A	0	0.00341967	0	0	0	0	0.00546329	0	0.0573271	0.0238063	0.0234481	0	0	0.00436151	0.000823281
SCRN1	0.26428	0.0965938	0	0.00616996	0.0234795	0.0113223	0.0907322	0.00841899	0.32137	0.142876	0.0892387	0.0927793	0.0567411	0.143171	0.012619
SDC1	0.264324	0.05426	0	0.00620759	0.011242	0.00812631	0.0138418	0	0	0.0174372	0.0166705	0.00725041	0.0145486	0.015332	0.00410878
SDC4	1.23348	0.314641	0.0835055	0.0178416	0.288273	0.0437081	0.0445456	0	0.204986	0.0736912	0.160424	0.0878617	0.0363697	0.0304128	0.0227779
SDF2L1	0.184305	0.282882	0.541486	0.277062	0.303351	0.140348	0.190383	0.0223193	0.371664	0.319184	0.29366	0.314023	0.217987	0.112979	0.210743
SDF4	0.413131	0.373818	0.361492	0.328618	0.547194	0.266892	0.327796	0.18024	0.572646	0.338037	0.454413	0.378748	0.436993	0.164195	0.270213
SDPR	0	0.367115	0	0.0174159	0	0.00808802	0.0365875	0.00724763	0.0877296	0.20448	0.0190837	0.0303452	0.965604	0.00445179	0.0111096
SEC31B	0.0417415	0.016187	0	0.0222484	0.0115132	0.022682	0.013963	0.0223779	0.061941	0.0263685	0.0225959	0.0155689	0.051808	0.0126117	0.0240413
SEC63	0.163559	0.299281	0.237472	0.18649	0.140018	0.173289	0.187678	0.0794863	0.321803	0.25082	0.24644	0.253317	0.318275	0.14094	0.137613
SELL	0.133193	0.270007	0.432995	0.229626	0.829046	0.646839	0.910809	1.79152	1.30932	0.572338	0.136243	0.812172	0.110829	1.39101	0.132131
SELPLG	0.170917	0.416482	0.667428	0.940359	0.752779	0.523932	0.632815	0.699171	0.817524	0.454986	0.419629	0.766625	0.22152	0.0630699	0.590941
SEMA3A	0	0.0338003	0	0.00219182	0	0	0.0048581	0	0	0.00248347	0.00384217	0.00279203	0	0	0
2021-09-08	0	0.122495	0.351187	0.0460779	0.0562517	0.0368169	0.0189662	0	0	0.05726	0.0514673	0.0202038	0.084847	0.0118014	0.0489141
SERGEF	0	0.070594	0.125749	0.0338031	0.030456	0.0412999	0.0287555	0	0.127797	0.0516688	0.0350337	0.0635635	0.0513713	0.0302262	0.0465107
SERPINA1	0.242329	0.191894	0	0.0349019	0.0534154	0.0307443	0.0536933	1.63306	0.239549	0.819165	0.607313	1.952	0.0729557	0.0695606	0.0317922
SERPINB9	0.0708223	0.205363	0.441714	0.306646	0.518687	0.260308	0.216261	0.101051	0.187754	0.376405	0.265423	0.508185	0.271007	0.383573	0.244537
SERPINF1	0.0495002	0.361384	0	0.0143086	0.0103569	0.00894021	0.0145116	0	1.50305	0.302078	0.262898	0.0724073	0.117606	0.0178574	0.0141335
SERPINF2	0.0222717	0.0164389	0	0	0	0.00105447	0.00601873	0	0.153477	0.0855774	0.0304943	0.0157196	0	0.00544317	0.000364577
SETBP1	0.109656	0.0989013	0	0.0822046	0.0453523	0.0047612	0.0291084	0	0.199625	0.0777806	0.0206385	0.0480435	0	0.227193	0.0133063
SF3A3	0.0740245	0.181579	0.137852	0.127289	0.155682	0.144403	0.0898324	0.0535493	0.278913	0.186985	0.129286	0.179173	0.214885	0.115944	0.129406
SFT2D1	0.221648	0.246859	0.409588	0.203777	0.284341	0.0978469	0.111653	0.205624	0.401058	0.318368	0.285613	0.338757	0.507367	0.177598	0.123703
SFXN3	0.0665888	0.104545	0.16091	0.128563	0.0904674	0.100835	0.0797648	0.0419104	0.206385	0.187451	0.228564	0.20382	0.350615	0.0286605	0.099243
SH2D1A	0.0368889	0.11815	0.38018	0.195292	0.376848	0.181969	0.298874	0.0440754	0.0407089	0.0286749	0.00821453	0.0147924	0.00736132	0.0251459	0.319119
SH2D2A	0	0.0979124	0.494238	0.237551	0.56908	0.165839	0.19274	0.019516	0	0.0253879	0.0309819	0.0283462	0.059675	0.0471944	0.173764
SH3BP2	0.195569	0.217648	0.143817	0.325471	0.162924	0.0960987	0.183156	0.225178	0.334366	0.28733	0.296421	0.646651	0.218839	0.120987	0.177365
SHMT2	0.122167	0.130932	0.0542733	0.0921617	0.242482	0.100822	0.0592388	0	0.137007	0.186056	0.158917	0.155466	0.188889	0.115078	0.0827273
SIDT1	0	0.0552113	0.0638201	0.0717192	0.0604744	0.0710634	0.0599556	0.00731774	0.501786	0.0628473	0.0508701	0.0176748	0.0425146	0.226553	0.0693096
SIGLEC1	0.0329126	0.0559764	0	0.00268978	0.00307636	0.000435198	0.01368	0.0454128	0.304075	0.265943	0.485265	0.225063	0.00661816	0.0317488	0.0123403
SIGLEC6	0	0	0	0	0	0	0	0	0.101049	0.00717376	0	0	0.110197	0	0
SIGLEC9	0	0.0247497	0	0.0096759	0.00897356	0.00532668	0.0098032	0.022771	0.0410806	0.110205	0.133216	0.185945	0.00911064	0.00352288	0.00900621
SIK1	0	0.0131664	0.09649	0.00402017	0.00339314	0.00421502	0.024469	0	0.0635164	0.0402337	0.0237095	0.0394007	0.0380885	0.0355771	0.00582843
SIRPB1	0	0.019569	0	0.0024274	0.0259221	0.00579113	0.0174668	0.556512	0.0228076	0.0604648	0.0565782	0.306429	0.0101469	0	0.00860501
SIRPG	0.0791319	0.062149	0.385922	0.022491	0.560305	0.1494	0.0596726	0	0.0746283	0.0244072	0.0143264	0.00469898	0	0.00866583	0.186164
SIT1	0.205029	0.232873	0.460724	0.280689	0.632344	0.348563	0.0334597	0.0174119	0.138441	0.0308345	0.0336812	0.0230946	0.011331	0.210917	0.410399
SKA1	0.0417415	0.00824568	0.130517	0	0.00260957	0.00305344	0	0	0	0.00153489	0.00158979	0	0.0176837	0.00531571	0.00351674
SKAP1	0.18317	0.218042	0.442503	0.335402	0.509068	0.314007	0.322112	0.0422308	0.103888	0.0364627	0.0298467	0.0354258	0.182882	0.057259	0.329962
SLA2	0.102181	0.187432	0.320201	0.236185	0.306018	0.179418	0.352084	0.0656214	0.231949	0.0376583	0.026099	0.0441711	0.0356394	0.0417733	0.386041
SLAMF1	0.136373	0.129557	0.23328	0.0623477	0.527059	0.238699	0.0396652	0.0119804	0.0969263	0.0195706	0.0160611	0.019838	0.018028	0.074624	0.181583
SLAMF7	0.0675775	0.113327	0.350171	0.376437	0.0204435	0.0355663	0.185219	0.00803387	0.232109	0.111542	0.086812	0.0650564	0.00894288	0.0422774	0.240819
SLAMF8	0	0.0407458	0	0	0.00449677	0.00371702	0.022127	0.00442594	0.129278	0.413497	0.277025	0.0935336	0.00243327	0.0172956	0.0217985
SLC11A1	0	0.0908429	0.105808	0.0183219	0.0477744	0.015692	0.0292545	1.91959	0.292961	0.211511	0.393849	1.23103	0.0671336	0.0515011	0.031157
SLC12A3	0	0	0	0	0	0	0.00455716	0	0.152507	0.00969644	0.00389235	0	0.00275282	0	0
SLC12A8	0.0464793	0	0	0	0	0.00092677	0	0	0	0.00383265	0.00306313	0.00284561	0.0358064	0.00487635	0.000813188
SLC15A3	0.0452656	0.150923	0.0638201	0.0319421	0.0121738	0.0235948	0.0176995	0.243938	0.338642	0.648215	0.838815	0.60124	0.0823019	0.182932	0.0291068
SLC17A5	0.182926	0.158563	0.0744731	0.0445677	0.0334534	0.0535986	0.0416932	0.0129061	0.0587527	0.058054	0.224545	0.0696298	0.0979248	0.0194586	0.0497003
SLC18A2	0	0.118482	0	0.00861931	0.00481638	0.00713486	0.00448486	0.0438903	0	0.01806	0.0166224	0.00958412	2.7287	0.00456571	0.00543601
SLC1A4	0.0839338	0.046486	0.382057	0.0421081	0.0623417	0.0214762	0.0559742	0.00664673	0.117781	0.0750789	0.0964257	0.0975108	0.0866991	0.016075	0.0249396
SLC24A3	0	0.00671848	0	0	0	0	0	0	0	0	0.00174588	0.00232766	0.557916	0	0.00297267
SLC2A6	0.0329126	0.0343945	0	0.0142083	0.00273138	0.00856893	0.0128098	0.00891875	0.118916	0.0921469	0.036084	0.19765	0.366676	0.0774811	0.0202982
SLC31A2	0.0329126	0.1033	0.0630524	0.0327668	0.0387464	0.0316758	0.0112483	0.336324	0.118961	0.472049	0.472686	0.644351	0.0438245	0.0192557	0.0209272
SLC38A1	1.11011	0.551653	0.503738	0.417622	0.583353	0.579088	0.574718	0.0429154	0.607919	0.279247	0.0544973	0.0573988	0.0399602	0.504414	0.529501
SLC4A1AP	0.0414096	0.0546307	0	0.0706434	0.0649279	0.0478032	0.0693668	0.0293257	0.0407914	0.0762334	0.0642862	0.0873828	0.0806875	0.0450997	0.0658915
SLC7A7	0.0222717	0.106389	0.0549096	0.00963019	0.0180632	0.00469346	0.00900889	0.100574	0.188033	0.375643	0.577573	1.04376	0.00861322	0.127134	0.017839
SLC9A3R1	0.795194	0.4231	1.16922	0.697968	0.344301	0.318323	0.406382	0.292976	0.133432	0.119665	0.0870246	0.255512	0.330712	0.0657752	0.462768
SLCO2A1	0	0.102818	0	0.0103927	0.0065013	0.00121863	0.00447643	0	0	0.00570557	0.00215656	0.00433722	0	0.00931133	0.000923892
SLCO2B1	0.0665888	0.249135	0	0.020241	0.00846731	0.0174681	0.0275551	0.0081413	0.25278	0.205903	1.12695	0.140755	0.354587	0.00521672	0.0320602
SLCO5A1	0.0222717	0.00527438	0	0	0.0219852	0	0	0	0	0	0.000829346	0	0	0.0133216	0
SMAD1	0.0906424	0.169206	0	0	0.0214395	0.00229354	0.0225369	0	0	0.00774432	0.0161804	0.0378228	0.0314181	0	0.00461392
SMARCD3	0.146507	0.0345629	0.09649	0.0109314	0.0140399	0.0179739	0.0190898	0.0674714	0.0288101	0.0551237	0.0402727	0.128865	0.0490981	0	0.0543485
SMPD3	0	0.0203493	0	0.044371	0.0257864	0.00669146	0.0274173	0.0099457	0.703582	0.0187075	0.00847827	0	0.00365834	0	0.0308237
SMPDL3B	0	0	0	0.00331019	0	0	0.00260635	0.0132803	0	0.00243561	0.00128907	0.0047468	0	0.00397299	0
SNX10	0.138012	0.11746	0.182244	0.0752663	0.107638	0.0429704	0.103881	0.402768	0.169123	0.436301	0.342684	0.503735	0.132178	0.133322	0.0921834
SNX5	0.10057	0.28451	0.639989	0.209614	0.366672	0.153883	0.1903	0.0884726	0.233844	0.430505	0.47078	0.374979	0.717615	0.245064	0.183263
SOCS1	0.269222	0.406045	0.605863	0.484419	0.544241	0.488819	0.750873	0.0900477	0.166754	0.160653	0.0663847	0.150984	0.976339	0.286362	0.416932
SOCS2	0.135645	0.140998	0.0441259	0.0699453	0.0821974	0.0341207	0.0618394	0.0162984	0	0.0114748	0.0109766	0.00742003	0.0770517	0.00458579	0.0196889
SOD1	0.803392	0.524731	1.20013	0.486032	1.05386	0.586976	0.441202	0.0809595	0.352149	0.444265	0.424716	0.40578	0.6659	0.461615	0.504791
SP140	0.13532	0.0376326	0.604907	0.129447	0.256882	0.154742	0.140085	0.020925	0.0578231	0.121012	0.0461498	0.0949232	0.0109779	0.320697	0.147523
SPAG4	0	0	0	0.00212306	0	0.0016816	0.00986691	0	0.116895	0.00131308	0.0047113	0.00773925	0.023645	0.00915775	0.00168015
SPARCL1	0.0832421	0.736779	0	0.0261049	0.00325562	0.0137684	0.0152019	0	0.0588011	0.0221601	0.0329851	0.0269902	0.0269781	0.00829223	0.0144407
SPIB	0	0.0229875	0	0	0.00862174	0.00469652	0.00496576	0	1.07655	0.131186	0.0233693	0.0146863	0.01087	0.408019	0.00320269
SPOCK1	0	0.0818036	0	0	0	0.00232272	0	0	0	0.0100344	0.00148166	0.0119992	0	0	0.00106245
SPOCK2	0.148062	0.790043	1.52904	0.805329	1.76181	1.39823	0.544936	0.178798	0.104263	0.129102	0.0856255	0.0657905	0.0384141	0.281958	0.943235
SPP1	0.103862	0.205622	1.08675	0.192584	0.416518	0.322358	0.359743	0.496136	0.963464	0.693567	2.14651	0.430541	0.28535	0.57689	0.379984
SPPL2A	0.324033	0.228649	0.179778	0.170963	0.242347	0.109891	0.112314	0.101031	0.224098	0.2654	0.371868	0.285783	0.183996	0.139226	0.160097
SQSTM1	0.696966	0.628996	0.578854	0.338597	0.685659	0.347131	0.476241	0.440688	0.817301	0.591925	0.912519	0.768412	1.81966	0.501085	0.3915
ST3GAL6	0.0414096	0.0204619	0	0.0132823	0.00884287	0.00582417	0	0.0561637	0.124101	0.108158	0.154922	0.0841217	0.181478	0.0170833	0.00884552
ST6GALNAC4	0	0.0465127	0.0899682	0.039173	0.10122	0.045747	0.0416119	0.0118154	0.486345	0.090448	0.0795379	0.0619349	0.0614493	0.0609083	0.0463268
ST8SIA1	0.11253	0.0173084	0	0.0158559	0.119922	0.067002	0.0034076	0	0	0.0111023	0.00440201	0	0.171338	0	0.0639544
STAB2	0	0.00729876	0	0	0	0.00105694	0.00442011	0	0.0407914	0	0.00111745	0	0	0	0
STAM	0.130989	0.0898363	0	0.0346431	0.350705	0.0352035	0.087252	0.0468827	0	0.0427773	0.0631211	0.0428728	0.135025	0.0190054	0.0257001
STAP1	0	0.0323747	0	0.004521	0.00372853	0.00593946	0.0610957	0	0.0353513	0.0301895	0.0125255	0.010278	0.416276	0.215069	0.00391806
STAT1	0.237327	0.305477	1.14229	0.342426	0.998128	0.437996	0.466624	0.263713	0.926917	0.735459	0.630082	0.672	0.422674	0.411053	0.415755
STAT4	0.127416	0.0921664	0.119725	0.181719	0.205673	0.12557	0.209795	0.0133183	0.098567	0.0482976	0.0239125	0.0316126	0.0079807	0.0140174	0.178803
STEAP4	0.178732	0.0841798	0	0.00319786	0	0.00127819	0	0.37884	0	0.0293795	0.00966888	0.0545657	0.0206379	0.00486033	0.00302056
STXBP6	0	0.00124739	0	0.00287802	0	0	0	0	0.0407914	0	0.000430714	0.00777189	0.285289	0	0.00316719
SULF1	0	0.0270439	0	0	0	0	0	0.0114078	0	0.00238532	0.00237462	0.00263275	0.0048761	0	0
SUMO2	0.415922	0.467394	1.30115	0.58275	1.10367	0.677714	0.551683	0.308878	0.786875	0.743255	0.680409	0.860905	1.05467	0.652798	0.632701
SVEP1	0.0497324	0.20334	0	0.00256829	0.0038239	0.0023633	0	0	0	0.00417559	0.00499529	0.0056887	0.0195	0.0111254	0.0024599
SYNE1	0.184512	0.272909	0.129451	0.53704	0.195577	0.267183	0.28041	0.12857	0.0215327	0.0867297	0.108838	0.0945152	0.126078	0.159844	0.296913
SYNGR2	0.54685	0.558612	0.0916302	0.256205	0.908831	0.303523	0.253485	0.179028	1.00326	1.21691	1.1105	1.15456	0.895002	1.23222	0.278316
SYT15	0	0.00350236	0	0	0	0	0	0	0	0	0.00138324	0	0	0	0
TAGLN	0.216966	0.641375	0	0.0321548	0.0635748	0.0132466	0.017287	0.0433898	0	0.0719345	0.0907499	0.179461	0.0776543	0.0816344	0.028399
TAL1	0	0.0339165	0	0.00280861	0	0.00237909	0	0	0	0.00207244	0.00746974	0	0.340228	0	0.00262997
TANK	0.288647	0.11455	0.331591	0.174032	0.311084	0.18585	0.127372	0.132764	0.0926784	0.142441	0.154703	0.223054	0.170995	0.165735	0.227404
TAP1	0.232968	0.400995	1.61001	0.626368	0.872095	0.423122	0.446014	0.451756	0.648087	0.467114	0.342977	0.427398	0.248393	0.351406	0.526712
TARDBP	0.315515	0.225809	0.381122	0.151394	0.224738	0.182671	0.157031	0.075233	0.358851	0.169417	0.1841	0.171813	0.242734	0.144283	0.209478
TBC1D8	0	0.0161221	0	0.00192697	0.0105958	0	0	0	0	0.0310963	0.0316593	0.0763496	0.00384644	0.0138091	0.0011785
TBX21	0.15057	0.214125	0.342985	0.854916	0.147288	0.0927417	0.298942	0.0291452	0.103223	0.0468048	0.0220075	0.0267129	0.0285559	0.0634534	0.305244
TBXAS1	0.149925	0.159762	0	0.0795924	0.0516812	0.0682073	0.0870929	0.350081	0.158513	0.564109	0.657875	0.818534	0.205731	0.0603619	0.0378371
TC2N	0.531131	0.232763	0.331985	0.263234	0.113256	0.347867	0.205497	0.0214156	0	0.0229805	0.0347351	0.0359949	0.0153291	0.0685368	0.420533
TCEB2	0.575299	0.56921	1.18483	0.506326	0.721812	0.4456	0.462806	0.381338	0.703773	0.591033	0.562617	0.823507	0.506594	0.35405	0.530149
TCF7	0.408572	0.40657	0.09649	0.17291	0.262485	1.00955	0.648944	0.0512558	0.018273	0.0815968	0.0723383	0.0653621	0.0609007	0.126115	0.434583
TCL1A	0	0.0121822	0	0.00215284	0	0.00383589	0	0	1.14578	0.00542873	0.0109906	0.0131724	0.0123559	0.578495	0.00420644
TEC	0	0.00387248	0	0.0131507	0.00240796	0.0173959	0.0306032	0	0.0228076	0.0188404	0.0173374	0.00814377	0.0613083	0.00625198	0.00351896
TEK	0.0414096	0.0348879	0	0	0	0.00131461	0	0	0	0	0	0	0.00295337	0	0.0010533
TEP1	0.0427445	0.0836354	0.179096	0.0561055	0.0555326	0.0508142	0.0443124	0.0118356	0.254644	0.155706	0.0931388	0.128047	0.07871	0.113503	0.0663512
TFEC	0	0.0349402	0.0707011	0	0.0102114	0.0041119	0.00414579	0.0215344	0.103004	0.20947	0.204711	0.197231	0.0116064	0.0832239	0.00473444
TFPI	0.0879856	0.277951	0	0.00874317	0	0.00893625	0	0	0.0697973	0.00541811	0.0220254	0.0071919	0.0270991	0.0054946	0.00408331
TFRC	0.0452448	0.112566	0.170777	0.0678976	0.238789	0.0912437	0.0903188	0.0371301	0.454894	0.176215	0.304554	0.362995	0.117137	0.0959999	0.0940573
TGFBR2	0.516505	0.800472	0.281754	0.42484	0.226156	0.470384	0.40133	0.220338	0.604857	0.481842	0.471923	0.427995	0.504006	0.399959	0.470606
TGM2	0	0.177421	0	0.00270299	0.0184379	0.0135175	0.0411761	0.0741255	0.074069	0.0856999	0.0756811	0.123101	0.0140535	0.0388313	0.00839652
THBD	0.0748529	0.303435	0	0.0173393	0.0177791	0.00778691	0.0196731	0.261006	0.605701	0.357051	0.242749	0.629592	0.0320234	0.0141769	0.00472446
THBS2	0.0425083	0.221445	0	0.0225508	0	0	0	0	0	0.0109668	0.00545589	0.00559247	0.0184995	0.0100952	0.00265923
THY1	0	0.0654589	0	0	0.0107085	0.0515033	0.00244416	0	0	0.0166985	0.0119163	0.019566	0.00444841	0	0.00624492
TIE1	0.0939588	0.189218	0	0.0145568	0	0.00241415	0.0635726	0	0.0407914	0.0171261	0.0206968	0.00952658	0.247316	0	0.00329021
TIGIT	0.0414096	0.0511116	0.699578	0.160684	1.72044	0.160264	0.200864	0.0474911	0.0685371	0.0618053	0.0244231	0.0302112	0.0113705	0.0198988	0.35584
TLL1	0	0.0255814	0	0	0	0.00119704	0	0	0	0.00323958	0.000995814	0	0	0	0.000974045
TLR10	0	0.0414993	0	0	0.00723355	0.000842646	0	0.0244042	0.147659	0.110169	0.0653565	0.00939506	0.00536059	0.413679	0.00293355
TLR2	0	0.0866084	0	0.010236	0.004212	0.012398	0.0108869	0.710953	0.047331	0.529863	0.420918	0.818722	0.0271468	0.0345645	0.0117324
TLR5	0	0.026423	0	0	0	0	0	0.0241605	0	0.0873025	0.129409	0.100319	0.00444841	0	0.00322178
TLR7	0	0.0584981	0	0.0123944	0.0172468	0.0039087	0.00320303	0.00664673	0.284923	0.188229	0.253761	0.144398	0.0181196	0.106875	0.00647788
TLR8	0	0.0293713	0	0.00359424	0	0.00592532	0.00868855	0.112206	0.0911663	0.167843	0.125628	0.282636	0.0102818	0.0178338	0.00632333
TM4SF18	0.283024	0.118578	0	0.0114686	0	0.00123351	0.00852174	0.0133535	0.0407089	0	0.00355255	0	0.0234779	0	0.00191159
TMC6	0.488192	0.362246	0.142405	0.450832	0.447213	0.424266	0.4011	0.172723	0.207738	0.210941	0.260373	0.235485	0.309032	0.358044	0.423274
TMED9	0.613842	0.5248	0.619536	0.437873	0.466551	0.264809	0.299662	0.157014	0.696425	0.568016	0.725122	0.567345	0.423947	0.254642	0.284591
TMEM119	0	0.0596715	0	0.00280075	0.00427593	0.0033478	0	0.0103132	0	0.00718335	0.0277594	0.0056886	0.0198022	0	0.00268217
TMEM156	0	0.022467	0.0809527	0.0613618	0.0575523	0.0501998	0.0877908	0.0581906	0	0.0737484	0.0316476	0.00562784	0.00359243	0.253184	0.0485883
TMEM173	0.207048	0.613937	0.551867	0.552693	0.704324	0.665774	0.256282	0.0256469	0.302794	0.402244	0.34142	0.386901	0.580076	0.0426556	0.402699
TMEM255A	0	0.00230571	0	0.0129205	0.0033679	0	0	0	0	0.00263338	0.0229139	0.00210429	0	0	0.00437134
TMEM60	0.0336762	0.0591043	0.21074	0.0315339	0.114931	0.0455869	0.0100863	0.0122136	0.122855	0.0959541	0.0891909	0.0652896	0.122587	0.0633103	0.0446488
TMEM9B	0.21882	0.254459	0.434584	0.21113	0.208742	0.171092	0.154812	0.0739471	0.212637	0.296162	0.314141	0.367789	0.292897	0.178092	0.2155
TMF1	0.0865331	0.142848	0	0.167695	0.106639	0.17516	0.0785332	0.164111	0.150675	0.163859	0.119016	0.13568	0.191542	0.139927	0.137679
TMSB10	2.22758	2.61654	3.35888	3.27857	3.3224	3.08482	2.41426	0.829047	3.24632	3.86521	3.09677	3.37998	2.12794	2.57761	2.67685
TNFAIP1	0.0631583	0.135556	0.200333	0.00691427	0.0504371	0.0248685	0.0168117	0.0240362	0.0655394	0.0300891	0.0509872	0.0331257	0.0372219	0	0.0106268
TNFAIP6	0	0.0288051	0	0.00277467	0.003939	0	0	0.199738	0	0.00815438	0.00359084	0.045309	0.00925323	0	0.000596839
TNFRSF10C	0.0336762	0	0	0	0	0	0	0.608966	0	0.00659757	0.00590095	0.0106891	0.0203034	0	0.000261491
TNFRSF11A	0	0.0573953	0.09649	0.00267288	0.0207818	0.00418204	0.0344305	0	0.0711468	0.082944	0.132101	0.0474375	0.0262594	0.0133708	0.00462865
TNFRSF13B	0	0	0	0	0.0525476	0.00121296	0	0	0	0	0.000827514	0.00472234	0	0.127898	0
TNFRSF17	0	0	0	0	0	0	0	0	0.0632313	0.00162532	0	0	0.00728909	0.0421949	0
TNFRSF18	0.0425083	0.0684211	0.879361	0.0483545	1.25437	0.0847964	0.543662	0	0	0.0333	0.0104256	0.0265937	0.112407	0.0221777	0.0345573
TNFRSF1B	0.207381	0.499382	0.907529	0.706099	1.57233	0.477958	0.393936	1.73213	0.742838	0.903264	0.786943	1.8161	0.10233	0.258039	0.504414
TNFRSF25	0.0414096	0.189924	0.33896	0.061262	0.287197	0.279955	0.129699	0.0244547	0	0.0230731	0.0317732	0.0196912	0.00672579	0.0365938	0.0985789
TNFRSF4	0	0.0529248	0.0441259	0.0133992	1.17388	0.0851139	0.176218	0.0227316	0.0319358	0.0197573	0.0182715	0.0211404	0.0879876	0.0126896	0.00862249
TNFRSF9	0.0750797	0.00808208	0.223318	0.0125546	0.685496	0.0039053	0.0554182	0.0207166	0	0.0179846	0.00928283	0.0316207	0.118715	0	0.0515426
TNFSF14	0	0.0530644	0	0.0476686	0.0453182	0.0468064	0.0998832	0.182278	0	0.0195264	0.0250982	0.0273886	0.0105264	0.0107452	0.109629
TNIP3	0	0.00779756	0.115294	0.0130771	0.0360606	0.00664956	0.00579082	0	0.0633547	0.00536423	0.00257974	0.00581558	0	0	0.0669085
TNNI2	0	0.0110987	0	0	0	0	0	0.0693385	0.0803818	0.0439301	0.0415921	0.0785583	0.0729123	0.0136309	0.00152078
TOMM22	0.154521	0.167864	0.173316	0.229737	0.253444	0.189518	0.190551	0.0539648	0.300892	0.344772	0.239441	0.316457	0.23089	0.279681	0.169609
TOMM34	0.260314	0.111211	0.119633	0.0406517	0.142197	0.0460956	0.0435012	0	0.105737	0.125425	0.0651517	0.0433567	0.0893682	0.0655671	0.0345753
TOX	0	0.0752435	0.358896	0.150034	0.351313	0.0762063	0.252301	0.02321	0	0.0577756	0.0176839	0.0137038	0.252271	0.0597427	0.191441
TPI1	0.467079	0.384761	1.55761	0.428637	0.663572	0.366882	0.503685	0.456066	0.616298	0.863712	0.785441	1.01439	0.581442	0.300263	0.401993
TPM1	0.850667	0.385786	0.0433223	0.0390916	0.0213589	0.0292152	0.020065	0.0226768	0	0.054478	0.0681908	0.052515	0.129091	0.0102192	0.0300193
TPM2	0.125082	0.0943377	0	0.022781	0.00810207	0.0230613	0.00551783	0	0.3726	0.0290253	0.0256537	0.0128775	0.0111229	0.00425005	0.0153531
TPM3	0.726399	0.647352	1.29213	0.960232	1.03456	0.75206	0.702744	0.804571	1.06296	1.1754	0.925685	1.37143	0.853798	0.7035	0.779847
TPM4	0.289018	0.35844	1.15412	0.453916	0.619402	0.27096	0.302182	0.443903	0.356572	0.682317	0.725024	0.735141	0.858809	0.193962	0.277955
TPP1	0.264574	0.470234	0.772582	0.354176	0.529177	0.348941	0.319338	0.318975	0.78187	1.15203	1.20646	1.23481	0.664347	0.37833	0.29959
TPSAB1	0	0.0799966	0.0459453	0.019337	0.0188576	0.0388226	0.0455753	0.132441	0	0.0552369	0.0514397	0.0923974	4.50451	0.0704175	0.0124018
TPSB2	0.197295	1.02039	0.129451	0.0832138	0.046901	0.0588838	0.0413155	0.0581842	0.208924	0.0628852	0.118218	0.0684157	5.64737	0.0457585	0.034522
TPST1	0	0.0414223	0	0	0	0.00257181	0.0192236	0.0121802	0	0.0143664	0.0148091	0.0170474	0.0383834	0.0131469	0.000270342
TRAC	1.04756	1.49465	2.40878	1.76052	3.24901	2.44821	0.648463	0.131707	0.462878	0.309142	0.242251	0.247935	0.121763	0.425718	2.52719
TRAF3IP2	0.0988644	0.0429701	0	0	0.0650631	0.0419218	0.0259079	0.024258	0	0.014234	0.012572	0.0137686	0.129036	0.0515268	0.0257952
TRAF4	0.362046	0.0421012	0	0.0367736	0.0263403	0.0225112	0.00726844	0	0.524284	0.0267739	0.012266	0.0187258	0.0910175	0.0783567	0.00932334
TRAK1	0.294274	0.148118	0.0603073	0.0760351	0.0899172	0.0526281	0.0654505	0.103078	0.250376	0.269727	0.21078	0.211271	0.130745	0.245311	0.0628569
TRAPPC1	0.365829	0.293672	1.11229	0.501446	0.486816	0.386731	0.400079	0.36033	0.428374	0.436031	0.350457	0.54754	0.400874	0.308691	0.400409
TRAT1	0	0.0964019	0.294867	0.0566675	0.0958235	0.221518	0.0523327	0.016282	0	0.0314743	0.00826429	0.0138704	0.00569957	0.0106315	0.138114
TRBC1	0.390447	0.924444	1.02899	1.54706	1.68355	1.52851	0.917567	0.0820734	0.201601	0.128625	0.111159	0.073534	0.0501968	0.13743	1.6183
TRDC	0.0414096	0.106473	0.245449	0.343451	0.0385614	0.0298756	1.24894	0.0156477	0.0678716	0.0192943	0.0286851	0.0215363	0.0661081	0.0094178	0.0908087
TREM1	0	0.0269678	0	0.010547	0.0272252	0.00809308	0.0279666	1.26803	0.12309	0.231486	0.228818	0.631626	0.0282433	0.00374796	0.012638
TREM2	0.0530303	0.140729	0.0456849	0.0280203	0.0607759	0.0419153	0.0686793	0.0738298	0.359634	0.281243	1.17864	0.16473	0.0396144	0.0485563	0.0664348
TREML2	0	0.00768905	0	0	0.00654579	0	0	0.127592	0	0.0062306	0	0.0119179	0.00505706	0.0190818	0
TRIB1	0.357084	0.0842337	0.246221	0.00765909	0.286188	0.029687	0.0129103	0.798582	0.256266	0.452436	0.223886	0.616887	0.0499847	0.0374385	0.0315169
TRIB2	0	0.121242	0.235655	0.115459	0.114861	0.133594	0.180367	0.025396	0.0674049	0.0365131	0.0149496	0.00895393	0.259157	0.0702591	0.117277
TRPM4	0	0.022546	0	0	0.00289497	0.0025315	0	0	0.143894	0.0293954	0.0264867	0.0215209	0	0	0.00310965
TRPM6	0	0.00542734	0	0	0	0.00103689	0	0.0545502	0	0	0	0.00501768	0.0130888	0	0
TSPAN15	0.0420918	0.0214431	0	0	0	0.0121756	0	0	0	0.0217297	0.0538494	0.002072	0	0	0.00275549
TSPAN18	0	0.104936	0	0.00296169	0.0421524	0.0657155	0.0140153	0.0112363	0	0.00324997	0.00455153	0.00267219	0.0041685	0	0.00952652
TSPAN7	0	0.169445	0	0.0137944	0	0.00429899	0.00204924	0	0	0.00109588	0.00732714	0.0126592	0.0998165	0	0.00259971
TTC38	0.0851535	0.066991	0.182936	0.387643	0.0756393	0.00853736	0.167514	0	0.135962	0.0458415	0.0765376	0.074013	0.100127	0.0195163	0.0427509
TUBB	0.630998	0.913832	3.84945	0.621527	0.880305	0.547572	0.588956	0.175587	1.09254	0.843058	1.10192	0.82207	1.23896	0.448922	0.537007
TUBB6	0.0409937	0.207336	0.0737802	0.0134878	0.0291708	0.00711307	0.00548406	0	0.415331	0.178152	0.141672	0.118827	0.118539	0.0639939	0.0105301
TWF2	0.152876	0.381217	0.598743	0.279697	0.3348	0.272422	0.253052	0.201418	0.714679	0.534536	0.588556	0.691236	0.27026	0.222709	0.331132
TXK	0	0.0512245	0	0.0853071	0.0293975	0.0553015	0.28287	0.0212954	0.0868101	0.00608341	0.0113931	0.00473369	0.031113	0.023165	0.0311586
TXN	0.491717	0.430579	0.805604	0.390792	0.663531	0.293059	0.278024	0.415148	0.992711	0.450302	0.45539	0.462453	0.491489	0.153103	0.302419
TYMP	0.288048	0.222449	0.663645	0.113399	0.67847	0.145741	0.126698	0.960369	0.595403	1.30685	0.985897	1.62315	0.281506	0.219534	0.161526
TYRO3	0	0	0	0	0.00503966	0.000999156	0	0	0	0.00461413	0.00706134	0.0046087	0	0	0
TYROBP	0.360462	0.640273	0.521731	0.564621	0.223885	0.170536	1.73581	2.07889	1.97492	2.62916	2.85855	3.01206	1.20517	0.224917	0.216699
U2AF1L4	0.111296	0.0660844	0	0.0290493	0.0263619	0.0536161	0.032886	0.026477	0.13017	0.0706375	0.0379748	0.060231	0.0516424	0.0573576	0.0520306
UBA1	0.326573	0.420818	0.728743	0.3516	0.396245	0.329643	0.348309	0.326475	0.505684	0.509357	0.4117	0.587865	0.532149	0.295296	0.367058
UBASH3A	0	0.0542836	0.0603073	0.0509851	0.139888	0.100304	0.0304163	0.00746893	0.018273	0.005839	0.00328667	0.00246588	0.0153242	0.00333047	0.13155
UBE2B	0.43434	0.330778	0.282962	0.292989	0.401611	0.227462	0.255792	0.838737	0.108817	0.360104	0.313625	0.470733	0.396524	0.211221	0.28116
UBE2J1	0.119122	0.219416	0.115294	0.14901	0.203342	0.104443	0.209662	0.30888	0.834972	0.208258	0.205542	0.404278	0.170514	0.306384	0.123477
UGP2	0.379965	0.358698	0.310533	0.259043	0.634623	0.364611	0.208118	0.146302	0.203373	0.287354	0.249697	0.335222	0.350513	0.254492	0.329429
ULK2	0	0.0499307	0.0749371	0.0223695	0.0101563	0.0164328	0.0104033	0	0.0217469	0.0278277	0.050387	0.0872609	0.0221948	0.00421371	0.0183442
UPK3A	0	0.00697518	0	0	0	0	0	0	0.0455726	0.063172	0.00364865	0.0213748	0.00513022	0	0.000594779
VASN	0.0536842	0.0544013	0	0.00621383	0	0.00243892	0	0	0	0	0.00208194	0.00361581	0	0	0.000784621
VCP	0.597655	0.580694	0.532857	0.441914	0.659035	0.365394	0.439414	0.306138	0.595708	0.567069	0.553602	0.484288	0.659409	0.440077	0.386587
VDAC2	0.163019	0.299018	0.50824	0.24654	0.318729	0.220554	0.257948	0.0539061	0.180293	0.428118	0.395671	0.38245	0.33113	0.240636	0.222751
VDR	0.0953164	0.0376595	0.192051	0.00873955	0.277168	0.0139988	0.0139184	0.180033	0.0856455	0.21598	0.0753277	0.212489	0.0628591	0.0208743	0.0118612
VILL	0	0.0365863	0.0630524	0.0259539	0.0241524	0.045179	0.0623419	0	0	0.0179089	0.0201228	0.010506	0.0275152	0.0259562	0.0411841
VNN1	0	0.00825587	0	0.00291789	0	0.00422336	0	0.0419055	0.0493681	0.0838722	0.0292985	0.185352	0.0027281	0	0
VNN2	0	0.055844	0.229617	0.079744	0.0168908	0.0188294	0.0670847	1.45018	0.0493681	0.0383565	0.0471975	0.268805	0.00315049	0.0798654	0.0433437
VNN3	0	0.00373236	0	0.00196162	0	0	0.0121963	0.227714	0	0.00632693	0.000971474	0.032078	0.00942681	0	0.00138455
VPREB3	0	0.0183204	0	0	0	0.00310824	0	0	0.0573271	0.00581338	0.00492924	0.00451624	0	0.838982	0.00104756
VSIG4	0.0758128	0.233184	0.116386	0.0264425	0.0657617	0.0275644	0.0353091	0.0426286	0.411029	1.31719	1.31214	0.598646	0.052934	0.0603107	0.0439325
VWA5A	0.199332	0.153427	0.0610209	0.0118422	0.0764446	0.0306115	0.102138	0.0204251	0.0434406	0.0399144	0.0625719	0.048962	2.76794	0.00919543	0.0147908
VWF	0	0.467219	0	0.0354926	0.0066044	0.0153365	0.0112551	0	0.0407914	0.0160022	0.0207297	0.0416516	0.0363619	0.0147154	0.00989618
WDR1	0.478574	0.563596	1.49639	0.94512	0.972051	0.556061	0.587689	0.481587	0.977269	0.737451	0.751753	0.875858	0.649177	0.398773	0.623963
WEE1	0.297464	0.114337	0.204916	0.0385334	0.0754488	0.036167	0.0626826	0	0.0678716	0.0392116	0.0245667	0.025872	0.118436	0.117541	0.0504323
WNT5B	0	0.00221065	0	0	0.00701807	0.00147241	0.00777377	0	0	0.0300309	0.0160495	0.0124821	0	0	0.000475366
WNT7A	0	0	0	0	0	0.0127078	0	0	0	0	0	0	0	0	0.00041794
WSB1	0.62705	0.7379	0.29988	0.355306	0.555086	0.330889	0.450553	0.751237	0.489873	0.826528	0.737776	1.11543	0.982051	0.499698	0.362126
YTHDF3	0.130564	0.0926802	0.0549096	0.0894268	0.0745941	0.0744436	0.0998844	0.0721052	0.146763	0.133416	0.146926	0.177987	0.146326	0.0681102	0.0601347
YWHAE	0.802423	0.462344	0.722446	0.183632	0.440471	0.25104	0.279793	0.0906754	0.472583	0.798511	0.751298	0.736677	0.806939	0.204878	0.232253
ZAP70	0.0375143	0.427783	0.536308	0.754579	0.36841	0.419213	0.446091	0.017342	0.0410806	0.0290026	0.0326514	0.0203654	0.0214355	0.0285421	0.438389
ZBP1	0	0.0424813	0.344808	0.0902182	0.135361	0.0866828	0.107584	0.121751	0.072239	0.0545875	0.0211163	0.0485537	0.0161738	0.144567	0.10872
ZBTB10	0.0726263	0.0811217	0	0.0316268	0.0102502	0.0455387	0.0628338	0	0.103662	0.0502738	0.0396238	0.0278537	0.0405544	0.0855956	0.0167124
ZBTB32	0.0639054	0	0.120184	0.00516072	0.166384	0.00224605	0.00396262	0	0	0	0.00143336	0.00670351	0.143187	0.0338029	0.00864067
ZC3H12A	0.0986406	0.084792	0.142435	0.107787	0.242937	0.129929	0.229384	0.100824	0.194912	0.132595	0.0631374	0.168802	0.390238	0.117375	0.126689
ZDHHC13	0	0.0272442	0.168927	0.0334745	0.0331781	0.0389619	0.0195924	0.0213386	0	0.0205883	0.0270601	0.026359	0.0605496	0.0386616	0.0300847
ZFP36L2	2.37442	3.028	2.77463	2.77351	2.33317	3.30851	3.26883	1.34311	2.57862	2.54983	2.0639	2.24146	2.4064	2.60591	3.25495
ZNF135	0.118637	0.013928	0	0.00646583	0	0	0.00591087	0	0	0.00491739	0.00153203	0	0.0207244	0.00500605	0.00139318
ZNF165	0.0336762	0.0110138	0	0.00314041	0.00758265	0.00189703	0	0	0	0.0064879	0.00243652	0.00317041	0.00614609	0.02003	0.00113542
ZNF180	0	0.0435716	0	0.0292998	0.0328777	0.0165422	0.012861	0	0.0398058	0.00504087	0.011683	0.0200623	0.0159783	0.0053769	0.0134668
ZNF189	0.0985703	0.0652057	0.138368	0.0206553	0.015131	0.0253094	0.026168	0.0123614	0.0937153	0.0458375	0.0617647	0.0294339	0.0974477	0.0609188	0.0124314
ZNF222	0	0.00854887	0	0.0110657	0.00537606	0.0115076	0.00930609	0.0118509	0	0.00694458	0.00462506	0.0114578	0.0175719	0.00484447	0.00957635
ZNF286A	0	0.00605351	0	0.023928	0.0238817	0.0138545	0.0147018	0	0	0.00995328	0.00787245	0	0.0148211	0.00978707	0.00802442
ZNF324	0.100549	0.0698402	0.124073	0.0670015	0.0243101	0.0381715	0.0406661	0.0483973	0	0.0278446	0.0261975	0.0675228	0.0522095	0.0466948	0.0420782
ZNF34	0.0464793	0	0	0.0156874	0	0.00448176	0.0158034	0	0	0.0141947	0.0112588	0.0125583	0.0321454	0.0135394	0.00776024
ZNF423	0	0.0107781	0	0	0	0	0	0	0	0	0.00130094	0.00275948	0.00526154	0	0
ZNF442	0.059995	0	0	0	0	0.00117547	0	0	0	0.00499128	0.00538528	0	0.0111981	0	0
ZNF521	0.0536842	0.0799608	0	0	0	0	0.0145144	0	0.0387184	0.00189585	0.00123095	0.00263275	0.189385	0	0
ZNF552	0.148067	0.0438009	0.0610209	0.0179736	0.0171905	0.00777103	0.0151112	0.025159	0	0.0141342	0.0137757	0.026115	0.021126	0.00780804	0.0116106
ZNF593	0.0368889	0.0599786	0.140665	0.0539226	0.08944	0.0203616	0.0480194	0	0.0451564	0.0922884	0.0639894	0.101312	0.0513688	0.0334754	0.0298128
TNFRSF13C	0	0.0597466	0.0603073	0.00297323	0.0327293	0.0242328	0.00988356	0	0	0.0137815	0.0158647	0.00272981	0	0.960875	0.0107566
RP5.887A10.1	0	0.0153766	0	0	0	0	0	0	0	0.00448657	0.000537094	0.00630989	0	0.593911	0
LINC00926	0	0.0592232	0	0.00265037	0.00853931	0.00326552	0.00443642	0	0.112159	0.0130258	0.00538402	0.00601901	0.00828264	0.64821	0.00268091
HLA.DOB	0	0.0515112	0.0459453	0.0149998	0	0.0151672	0.00927512	0.0212695	0	0.0918832	0.0171593	0.0167537	0.0168954	0.560186	0.0117826
IGHG1	0.0525112	0.0146526	0.0630524	0.0311426	0.056483	0.0206495	0.0557638	0.0319891	0.195983	0.0454974	0.0994915	0.0475363	0.0254207	0.715051	0.0203792
FAM30A	0	0.0481414	0	0.00533405	0	0.000806599	0.0559789	0	0.192863	0.00773123	0.000705584	0.00482784	0.0638617	0.385173	0.00169644
SNX22	0	0.0206292	0	0.0061683	0.00966189	0	0.00995806	0.0138426	0	0.00732211	0.00691361	0	0.015819	0.32581	0.00232513
CD24	1.20121	0.328273	0.09649	0.0516647	0.0342791	0.0336738	0.0523282	0.0364972	0.115173	0.047673	0.043604	0.0529995	0.0948616	0.709943	0.0177808
CPNE5	0	0.0433081	0	0.00513903	0.00791204	0.00528132	0	0.0149093	0	0.00572705	0.00666854	0.00917497	0.275247	0.365426	0.00201037
FCMR	0.163952	0.476918	0.146558	0.363405	0.709078	0.47744	0.374819	0.0355091	0.0783294	0.0459053	0.0831842	0.0658177	0.0161054	1.39931	0.3696
IGLC3	0.0485506	0.0628481	0.305986	0.0644762	0.13933	0.0939678	0.126043	0.254465	0.314522	0.172906	0.093607	0.194131	0.354255	0.886278	0.0523435
IGLC2	0.0545812	0.918311	0.363291	0.0988612	0.174767	0.134916	0.187664	0.476179	0.305164	0.237225	0.151381	0.322793	0.480806	1.28884	0.101156
STRBP	0.238614	0.138043	0.0686282	0.0365588	0.0743376	0.0736681	0.169602	0.00761381	0.345104	0.0324092	0.0461211	0.0218642	0.118785	0.559752	0.110486
SMIM14	0.662482	0.240198	0	0.0892739	0.0405251	0.0804321	0.0821033	0.06243	0.678218	0.355999	0.193694	0.332685	0.131851	0.709864	0.079063
TCF4	0.0583058	0.562369	0	0.024761	0.0114722	0.0121529	0.102893	0.0274912	2.0828	0.452146	0.292719	0.214776	0.0820027	0.676546	0.0112889
PLEKHF2	0.219306	0.133634	0	0.058009	0.132836	0.0601318	0.0581558	0.100724	0.0946694	0.112581	0.0958621	0.12194	0.3405	0.519448	0.076753
SWAP70	0.164181	0.197944	0.0543466	0.0318909	0.0465821	0.0181946	0.0504974	0.0242404	0.133349	0.211611	0.293142	0.230713	0.714011	0.628004	0.0334436
2021-03-01	0	0.138547	0	0.0134025	0.0126243	0.00888763	0.0193615	0.0081413	0.339222	0.624282	0.342891	0.584621	0.0240675	0.69146	0.0108294
IGHA1	0.0970896	0.605083	0.226504	0.214087	0.226384	0.281176	0.384689	1.32583	0.283267	0.514228	0.270464	0.490282	1.11944	0.863541	0.166951
JCHAIN	0.0375143	0.387363	0.144981	0.0779093	0.106923	0.118871	0.11616	0.293655	2.68901	0.187774	0.1069	0.196712	0.36487	0.494137	0.0680115
C1ORF186	0	0.0728109	0	0.0118731	0.00394627	0.00526048	0.0127112	0	0.0710205	0.00271959	0.00957754	0.0107076	2.35379	0.0502081	0.00302686
LMO4	0.368478	0.38923	0.100125	0.154353	0.0674395	0.12795	0.261552	0.176542	0.490229	0.245121	0.23003	0.295081	2.50032	0.228151	0.142941
SLC45A3	0	0.0714198	0	0.00297323	0.0156131	0.0076844	0.00456038	0.07492	0.0634893	0.0190822	0.0276109	0.0204468	1.82671	0.0477445	0.0033637
LIF	0	0.112912	0.0459453	0	0.0289276	0.0263064	0.233841	0.0524217	0	0.00473825	0.0124243	0.0301242	1.58968	0.0111672	0.00775764
CLU	1.25001	0.779153	0.0818519	0.0541681	0.0138517	0.142498	0.0622299	0.0351359	0	0.0398613	0.0325677	0.081462	2.0673	0.0257348	0.0870182
STX3	0.0427445	0.238274	0.0549096	0.180603	0.0294215	0.0823036	0.0324454	0.792998	0.121439	0.119331	0.111013	0.113533	1.28344	0.01397	0.0788541
KIAA1522	0.546312	0.172055	0	0.00265037	0	0.00541921	0.00762011	0	0.155601	0.0232409	0.0307534	0.0216738	1.04307	0.00435131	0.00705831
DLC1	0.152518	0.205921	0	0.0101737	0	0.00460807	0.0280135	0.0165389	0.164946	0.0108961	0.0168526	0.0300529	0.996347	0.00484052	0.00407553
BACE2	0.171355	0.120796	0	0.00254694	0.00919604	0.00418265	0.0217654	0.0165389	0.0634893	0.00789173	0.0111959	0.00705707	0.954711	0.130922	0.00189463
BTK	0.0222717	0.0784057	0	0.00558651	0.00240796	0.0125828	0.014881	0.0639644	0.108585	0.316807	0.252992	0.406265	1.29648	0.319713	0.00994298
HS6ST1	0.126231	0.0344196	0	0.0466982	0.0223987	0.0149971	0.00752496	0	0.0895002	0.0523748	0.0428952	0.0225632	0.944014	0.0223675	0.0123728
EGR3	0.0418649	0.0782033	0	0.0186708	0.0386781	0.0235892	0.0315366	0.249261	0	0.132472	0.0827664	0.0955532	0.938527	0.073388	0.0173561
EGR1	0.726784	1.13808	0.334656	0.166664	0.16922	0.214515	0.728573	0.825214	0.186891	0.843655	0.848018	0.759518	3.15156	0.409333	0.281534
PTGS2	0.0414096	0.101764	0	0.0139068	0.00877279	0.010855	0.048696	0.940299	0	0.251198	0.0905254	0.226259	1.1346	0.0263654	0.00883829
ACSL4	0	0.103707	0.179588	0.0465668	0.345835	0.0382604	0.0667529	0.110901	0.182964	0.266405	0.208648	0.338678	1.17995	0.0636911	0.0596717
NR4A1	0.0735352	0.728583	0.27889	0.136567	0.322231	0.221297	0.684578	0.210977	0.923327	1.0703	0.556615	1.28635	2.55343	0.577106	0.204562
MIR24.2	0.302362	0.469409	0.195218	0.211341	0.204149	0.246644	0.49549	0.431828	0.218053	0.397543	0.316333	0.487495	2.02054	0.205021	0.296011
TSC22D1	0.776303	0.497124	0.0542733	0.0872951	0.0724038	0.0645153	0.153639	0.0315545	0.210533	0.17132	0.346951	0.219087	1.30001	0.0472063	0.108135
LAPTM4A	0.829175	0.848563	0.431513	0.244006	0.373759	0.227264	0.276871	0.338094	0.640254	0.819491	0.948345	0.931925	2.17475	0.280688	0.255691
DUSP6	0.134216	0.506379	0.147326	0.136486	0.0781408	0.199963	0.292693	0.238039	0.320346	0.306933	0.516859	0.935195	1.62564	0.0635509	0.277719
RGS2	0.569507	0.654522	0.536766	0.377259	0.637001	0.508971	0.657603	3.4913	1.48325	2.0881	1.06951	2.55705	3.08476	0.895025	0.560369
IER2	0.889954	1.31906	0.76746	0.83898	0.651426	0.662217	1.58854	1.32142	0.537398	1.23204	0.873059	1.26078	2.84254	0.843333	0.757462
VCAN	0	0.477007	0	0.0203374	0.0527667	0.0386795	0.0291371	0.0663545	0.326364	0.675231	0.373975	2.27266	0.0601658	0.0839177	0.0322623
S100A8	0.0996321	0.122954	0.127631	0.052898	0.0769653	0.0271829	0.0709506	3.28117	0.334288	0.377491	0.248249	2.051	0.0814504	0.0498428	0.0401108
CTSS	0.183797	0.638885	0.451109	0.352758	0.515754	0.418611	0.38239	1.49755	1.61133	1.97069	2.0628	3.2579	0.272012	0.995685	0.421979
MPEG1	0.126352	0.167425	0	0.0179703	0.037963	0.0265859	0.0468797	0.266742	2.10275	1.11762	0.746632	1.65705	0.0491761	0.547664	0.0330512
CYBB	0	0.220184	0	0.0146945	0.0487306	0.0329929	0.0477368	0.0744344	0.901277	0.784498	1.09094	1.60957	0.0427731	0.430237	0.0354162
THBS1	0.13489	0.111581	0	0.0167128	0.0150962	0.0131197	0.0549231	0	0.129864	0.242066	0.122658	0.782395	0.0898346	0.0311863	0.00994557
LINC01272	0	0.0745416	0	0.00903309	0.0105178	0.00548455	0.0142965	0.866796	0.139289	0.0875387	0.207234	0.720192	0.0126759	0.0056209	0.0127512
SPI1	0.101682	0.221425	0	0.00268716	0.0300866	0.0104546	0.0071526	1.88553	0.486419	1.25325	1.11218	1.65736	0.4371	0.251895	0.02198
EREG	0.132584	0.0143787	0.138415	0.0137581	0.0278041	0.00476306	0.0414315	0.0459307	0.205558	0.329376	0.168303	0.747434	0.0577429	0.0276612	0.0162483
AP1S2	0.349211	0.278269	0.599498	0.136368	0.219707	0.167307	0.110124	0.187716	0.700018	1.09883	0.576319	1.50172	0.432615	0.264213	0.149208
CEBPB	0.626665	0.943774	0.654176	0.502649	0.30641	0.351349	0.50175	3.19101	0.446094	1.40716	1.49547	2.53319	0.626724	0.268554	0.407819
KLF4	0.159508	0.74257	0.188449	0.0663133	0.102359	0.0690006	0.208861	0.14597	0.962152	1.7391	1.13115	1.83004	0.506622	0.187918	0.0628742
CEBPD	0.768762	1.5481	0.425932	0.264712	0.178658	0.232046	0.937087	2.24256	0.746975	2.64339	1.9609	2.78861	0.139033	0.20344	0.253618
WARS	0.174579	0.17727	0.0459453	0.114106	0.250892	0.0659961	0.11521	0.118846	0.452586	0.465303	0.236993	0.98811	0.182279	0.118807	0.0763564
TKT	0.0709234	0.34146	0.50848	0.16483	0.281449	0.217876	0.224013	1.06323	0.298817	0.800112	0.689022	1.58727	0.307393	0.248344	0.180398
HBEGF	0	0.131582	0	0.0109024	0.0607522	0.0576806	0.0409745	0.0509067	0.0493681	0.737211	0.347727	0.935851	0.0510222	0.0273906	0.0338593
TIMP1	0.280488	0.458321	0.279779	0.20332	0.298156	0.339681	0.183967	0.504771	0.661743	1.21912	0.663607	1.69749	0.831577	0.0882282	0.148206
RHOB	0.925681	0.68584	0.0630524	0.300876	0.378372	0.16133	0.746534	0.52715	0.52989	1.38991	1.2837	2.07357	0.497062	0.651295	0.210194
COTL1	0.521951	1.13364	2.32971	0.524138	1.35327	1.11049	0.983766	1.86987	1.17309	2.67852	1.65422	3.07918	0.774197	1.17504	1.1588
IFITM3	0.797081	1.2168	0.374884	0.268753	0.258145	0.189393	0.770758	1.25319	0.688536	1.95358	1.23011	1.96616	1.01798	0.139093	0.207112
FN1	0.192792	0.645351	0.151244	0.124784	0.159379	0.151731	0.147636	0.0684957	0.550453	0.603818	1.84028	0.522462	0.264849	0.26859	0.198041
SEPP1	0.541497	0.345339	0.0542733	0.0461951	0.0133607	0.0275983	0.00866658	0.0168457	0.161137	0.0701172	0.930151	0.0534654	0.0497548	0.0471761	0.0298579
LGMN	0.154515	0.180911	0	0.0369267	0.0690296	0.0397109	0.0353437	0	0.945884	0.253504	1.32117	0.160683	0.0463265	0.117091	0.0531062
CTSB	1.15194	0.697263	0.528	0.246391	0.597541	0.504225	0.239965	0.290529	2.46779	1.79898	2.97757	2.12213	1.16983	0.468699	0.330449
HMOX1	0.0452656	0.254185	0.274613	0.0368617	0.145172	0.0558331	0.0830151	0.13274	0.340752	0.600314	1.26844	1.05798	0.11437	0.137041	0.0688682
PLTP	0.179333	0.26895	0	0.0293064	0.0213345	0.0264125	0.0623344	0.0142716	0.269418	0.167284	0.984979	0.112364	0.0269855	0.0624212	0.0270104
CTSD	0.796655	1.12188	1.39896	0.913086	0.912955	0.706322	1.1597	0.943326	1.55733	1.00859	3.03879	1.75554	2.7225	0.47782	0.977316
GRN	0.750056	0.824072	0.436251	0.249166	0.410807	0.218001	0.236952	0.836698	2.22961	2.48303	2.7591	2.46173	0.756974	0.546954	0.235096
PSAP	1.4061	1.45787	1.23574	0.906793	1.05488	0.827572	0.886084	1.44885	2.6664	3.00231	3.67401	3.79185	1.70023	1.06602	0.834585
NPC2	0.559751	0.696744	0.437683	0.261612	0.256479	0.267921	0.243323	0.263546	1.73339	1.87469	2.44064	1.91945	0.978737	0.412826	0.251424
DAB2	0.0620511	0.225446	0	0.0226452	0.0128554	0.0196059	0.0171127	0.0246044	0.529337	0.236969	0.921249	0.124059	0.0731323	0.0232048	0.0226465
MARCKS	0.641646	0.551649	0	0.0512028	0.111546	0.0398598	0.0907107	0.698838	0.383185	0.809566	1.57984	0.87222	0.125675	0.56127	0.0615382
TGFBI	0.0414096	0.300761	0.304069	0.0485773	0.13727	0.137368	0.154834	0.064229	1.89482	1.32929	1.67728	1.56867	0.108649	0.150057	0.126827
LRP1	0.305016	0.907604	0.190069	0.0756756	0.0461146	0.0735241	0.101103	0.0855468	0.602064	0.862143	1.42038	1.37726	0.0897481	0.0682474	0.0778039
FCGRT	0.620717	0.46434	0.0638201	0.0564242	0.0608882	0.078243	0.0547539	0.780889	1.12542	1.35645	1.43216	1.21471	0.168355	0.136835	0.0825998
SGK1	0.430107	0.483491	0.0840666	0.0664943	0.169236	0.26066	0.288337	0.43382	0.623124	2.20734	1.83536	1.22422	1.00939	0.337685	0.168461
GSN	0.417611	0.984369	0.0646685	0.0675822	0.0325917	0.0543495	0.290314	0.309548	0.905135	1.22858	1.29787	0.387099	0.49699	0.106268	0.0656784
LPL	0	0.127928	0.119465	0.0217057	0.0245594	0.0203281	0.0212623	0.0216773	0.128905	0.0963643	0.539436	0.0350696	0.0209336	0.0320634	0.033572
SLC40A1	0.229391	0.203985	0	0.0220199	0.0438614	0.0587733	0.0308567	0.126902	0.141055	0.122228	0.605444	0.0759728	0.111388	0.0257871	0.0294215
CSTB	0.71252	0.854385	0.827559	0.509096	0.821497	0.585322	0.451135	0.424678	0.909605	1.18376	1.8312	1.19676	0.920805	0.555647	0.605345
FCGBP	0.0222717	0.0940294	0	0.00634902	0.0371109	0.0222861	0.0259023	0	0.0215327	0.0372662	0.351792	0.0249077	0.0057611	0.00352288	0.0469138
CST3	1.60207	1.81927	0.400985	0.215585	0.299165	0.204314	0.356322	0.351493	2.69625	4.19354	3.04301	3.27255	1.13318	0.285653	0.211263
HLA.DQA1	0.398615	0.27547	0.588534	0.112815	0.402495	0.0606972	0.134703	0.0210034	1.47336	3.09796	1.83201	1.07473	0.0952013	1.70392	0.199231
HLA.DRB1	0.449582	0.613251	1.73143	0.371758	0.865059	0.172292	0.382646	0.402315	2.35762	4.04224	2.95395	2.70249	0.322992	2.35995	0.450144
HLA.DPB1	0.794806	1.06778	1.8096	0.803856	1.1719	0.349763	0.561081	0.172956	2.4615	4.20131	2.89294	2.40808	0.334794	2.49849	0.807715
HLA.DQB1	0.526245	0.611171	0.599523	0.265712	0.600767	0.204683	0.218761	0.200324	1.66477	3.40525	2.25213	1.62872	0.19047	2.36736	0.285448
HLA.DRA	0.7776	1.83225	2.01596	0.547603	1.38629	0.621266	0.97167	0.579535	3.56643	5.21076	4.36589	3.89878	0.682438	4.48996	0.888768
HLA.DPA1	0.652244	0.892163	1.63208	0.541095	0.979658	0.312833	0.48539	0.2703	2.62821	4.02039	2.92985	2.54949	0.341708	2.49471	0.577379
HLA.DRB5	0.265529	0.213355	0.132123	0.065833	0.147873	0.0367025	0.0611968	0.0799645	0.715504	1.86645	0.858417	1.03133	0.188598	0.493068	0.0730894
HLA.DMA	0.37137	0.398701	0.930243	0.106474	0.355196	0.0603205	0.124812	0.130755	1.03179	2.08193	1.43779	1.11312	0.128841	0.960983	0.210127
HLA.DMB	0.282954	0.490545	0.340774	0.0577404	0.18804	0.0663618	0.125603	0.127865	1.12142	1.95492	1.44994	1.11951	0.134443	1.12074	0.159107
IL13RA1	0.389952	0.29962	0	0.02037	0.0252595	0.0116658	0.0332597	0.383873	0.485766	1.07865	0.554773	0.586209	0.0599615	0.0905338	0.018464
LGALS2	0	0.0240197	0	0.00306925	0.0182554	0.00873049	0.0228216	0	0.180408	0.574117	0.0575724	0.537413	0.00694649	0	0.00755098
HLA.DQA2	0.23216	0.15078	0.339471	0.0528651	0.215113	0.00835526	0.0450851	0.0101756	0.558178	1.13577	0.541074	0.445957	0.0244273	0.599036	0.0615613
HLA.DOA	0.0222717	0.216478	0.123645	0.010139	0.0432684	0.0141576	0.0187393	0.0178203	0.427928	1.03856	0.567281	0.187281	0.0408153	0.625764	0.0373465
MRC1	0.0486517	0.158275	0	0.0389273	0.0453533	0.0127245	0.0259814	0.0412853	0.206456	0.978875	0.522767	0.187191	0.0316898	0.0126497	0.0157656
C1ORF162	0.160506	0.235129	0.184239	0.199446	0.0888502	0.207401	0.236727	0.231455	0.641699	1.56635	0.834182	1.40563	0.533606	0.224239	0.0906789
KCTD12	0.123506	0.412736	0	0.0411787	0.0530592	0.0369293	0.0388041	0.152814	0.378618	1.325	1.07034	1.21259	0.0976266	0.0699169	0.0371962
CTSH	0.287117	0.260096	0	0.0556701	0.0931708	0.111221	0.0355691	0.0189222	0.467566	1.3307	0.914607	0.922498	0.0213446	0.570665	0.0594492
HLA.DQB2	0	0.103454	0.155035	0.0271619	0.0420025	0.00817469	0	0	0.128771	0.618393	0.246194	0.130108	0	0.150538	0.0190229
ETS2	0.209199	0.33855	0.0441259	0.0621971	0.0538316	0.0498543	0.096668	0.339428	0.275687	1.06177	0.495745	0.995252	0.303036	0.0416784	0.0648597
CSF2RA	0.0495002	0.0796836	0.0835055	0.00318356	0.00930953	0.00574684	0.00908534	0.338504	0.355233	0.731262	0.4116	0.470373	0.0331692	0.00918448	0.0141023
JAML	0.205836	0.445927	0.47017	0.0574812	0.226031	0.317955	0.171252	1.12212	0.685082	1.30434	0.293629	1.0804	0.0607218	0.0493112	0.438965
GRASP	0.0813829	0.233166	0.0744848	0.0326074	0.07473	0.0334028	0.237718	0.0238694	1.11595	0.747379	0.225338	0.466554	0.417926	0.214688	0.0237952
SAMHD1	0.123131	0.443732	0.811477	0.489405	0.54484	0.419654	0.437228	0.177843	1.41162	1.71217	1.15532	1.58569	0.082729	0.119227	0.335956
AREG	0.658074	0.671777	0.118611	0.267044	0.122762	0.312801	1.83276	0.268214	1.70164	1.38349	0.301931	1.05482	1.52925	0.321031	0.217507
LRRC26	0.0336762	0.00730274	0	0	0	0	0	0	0.546439	0.00285338	0	0	0	0	0
PACSIN1	0	0.0120945	0.0631736	0.00319068	0	0.00194054	0.0504346	0	0.780168	0.00217532	0.002485	0	0.0022332	0	0.0140663
LAMP5	0	0.0091382	0	0	0	0	0	0	0.511369	0.0182621	0.00527649	0.0113031	0	0	0
DERL3	0	0.01224	0.0835055	0.0058947	0.0106021	0.00292391	0.00393755	0.0234415	0.986276	0.0115787	0.0276609	0.0228385	0.0230436	0.14484	0.00790117
SCAMP5	0.0486517	0.00897711	0	0.00848473	0.00264258	0.0021628	0	0	0.623412	0.0032124	0.0215097	0.0117209	0.00444849	0	0.00457273
TSPAN13	0.47082	0.15157	0	0.0100864	0.0609912	0.00572374	0.0109193	0.0404191	1.14797	0.0134442	0.0227793	0.0112085	0.00608505	0.147833	0.00444176
PTGDS	0.0639054	0.227323	0	0.198955	0.0234996	0.0199159	0.040701	0	1.81274	0.0198484	0.0338744	0.0291819	0.0163366	0.0176761	0.0116689
RASD1	0.208617	0.30376	0	0.0305195	0.0389944	0.0261954	0.0716728	0	1.04242	0.013203	0.0254887	0.0639481	0.0105974	0.0144518	0.030043
TNFRSF21	0	0.0867918	0	0.007133	0.0033679	0.00234777	0.00895453	0	0.935348	0.169784	0.17298	0.0909798	0.184739	0.0184798	0.00213146
PLD4	0	0.0604815	0	0.00176849	0.00753712	0.0011139	0.0139972	0.0210079	1.59436	0.425716	0.300175	0.113669	0.00415628	0.111069	0.00764908
FUT7	0	0.0346911	0	0.0209016	0	0.0199588	0.0667764	0.16975	0.805289	0.0771132	0.0131062	0.0188353	0.00981417	0.0260937	0.0102099
IRF4	0.0346649	0.0538607	0.323645	0.0660559	0.251279	0.0482769	0.106094	0.00746893	1.38934	0.134856	0.0471252	0.0454326	0.0225405	0.172748	0.102652
CYB561A3	0.0414096	0.151847	0.279119	0.132031	0.0829824	0.0878043	0.109895	0.0462724	1.75209	0.211261	0.192875	0.14441	0.17626	0.478219	0.0910786
IRF7	0.174383	0.0863197	0.147925	0.103056	0.272291	0.106142	0.281628	0.16219	1.98988	0.327394	0.234486	0.470399	0.147548	0.301115	0.138181
CLIC3	0	0.0410846	0	0.167275	0.00320116	0.0122921	0.124423	0	0.680382	0.00925352	0.00671439	0.00291734	0	0.00826418	0.0705667
UGCG	0.219394	0.316594	0.157523	0.136443	0.180862	0.119067	0.123799	0.0412361	1.62537	0.237636	0.195766	0.107546	0.0757137	0.245267	0.115259
CCDC50	0.174932	0.115043	0.137349	0.0227851	0.155133	0.0294755	0.100008	0.0115658	1.21037	0.228341	0.15627	0.156286	0.024504	0.320938	0.0347814
CLN8	0.133342	0.109552	0	0.0541906	0.0789774	0.0530503	0.0932803	0.0861177	1.70404	0.429766	0.364846	0.336476	0.198496	0.110369	0.0355037
SOX4	0.964327	0.396739	0.144	0.023789	0.310943	0.0135414	0.228831	0.0414581	1.24794	0.120323	0.105407	0.171904	0.4371	0.0222949	0.0199321
PLAC8	0.0494736	0.13784	0.0835055	0.531445	0.0537606	0.208447	0.44661	0.065979	1.56952	0.176972	0.0887315	0.494443	0.0317722	0.333677	0.0988462
ITM2C	0.200592	0.165411	0.12336	0.0363467	0.0521735	0.105252	0.240158	0	1.09973	0.117846	0.0740282	0.043108	0.460873	0.129958	0.256528
SLC7A5	0.0536842	0.277901	0.529819	0.246313	0.348499	0.182799	0.182865	0.0698872	1.33554	0.116654	0.0882672	0.114661	0.258752	0.0590265	0.29642
PPP1R14B	0.219706	0.14177	0.214264	0.0917852	0.156797	0.18345	0.280247	0.0533891	1.40242	0.273077	0.24413	0.175068	0.195861	0.121166	0.311865
MAPKAPK2	0.647253	0.356748	0.585779	0.369816	0.483484	0.315294	0.352957	0.483566	1.56773	0.255339	0.250402	0.457641	0.305943	0.202312	0.362206
DUSP5	0.261388	0.165482	0.33674	0.17455	0.143049	0.167324	0.122644	0.0131028	1.02988	0.373899	0.107096	0.183131	0.067746	0.191684	0.167077
C12ORF75	0.300143	0.237126	1.20446	0.641009	0.203912	0.153353	0.234494	0.00803387	1.11822	0.121722	0.0497143	0.030792	0.0383567	0.09002	0.303724
GAS6	0.0463532	0.257664	0	0.0140372	0	0.0146804	0.0103709	0.012533	0.52549	0.325742	0.256434	0.0839503	0.0366789	0	0.0126877
G0S2	0.040724	0.0632384	0	0.0272234	0.0123146	0.0139485	0.0217782	3.02344	0.228764	0.15191	0.105256	0.417338	0.182235	0.0352926	0.0100591
ADGRG3	0	0.0391638	0	0.00559919	0	0.00305097	0.207542	1.106	0	0.00435688	0.00247427	0.0195146	0.0198714	0.00390745	0.0025215
CMTM2	0	0.0089024	0	0	0	0.0032289	0	0.971153	0	0	0.00240703	0.0130136	0.00315049	0	0.00253363
DGAT2	0	0.0171673	0	0	0.00499045	0.000825376	0.00320303	0.871975	0.0288101	0.0068404	0.0100284	0.0792518	0.00243327	0.0191565	0.00215468
SLC25A37	0.811302	0.313575	0.246052	0.0982205	0.147968	0.146342	0.108494	2.99453	0.191523	0.369468	0.268452	0.940693	0.168947	0.28951	0.128064
BASP1	0.204148	0.176251	0.188126	0.0183573	0.0904133	0.0195674	0.0124425	2.42458	0.291616	0.963182	0.38658	0.51777	0.338423	0.842386	0.0232752
MSRB1	0.0452448	0.0737829	0	0.0434331	0.0885472	0.0206009	0.0386972	1.06114	0	0.095898	0.0783776	0.250646	0.0457531	0.00810519	0.0286325
SOD2	0.521025	0.452387	0.299855	0.161598	0.232201	0.225561	0.0886965	2.63251	0.402479	0.589575	0.665392	1.22802	0.225902	0.137345	0.154562
LILRB3	0	0.0711576	0.0549096	0.00538648	0.0232344	0.0128172	0	1.57256	0.0874564	0.39282	0.328482	0.773858	0.0260749	0.0288709	0.0110947
NEAT1	1.73669	1.77854	1.12906	1.06247	1.28656	0.937115	1.13166	4.57578	1.75725	2.04169	1.99627	3.22051	2.84517	0.839913	0.867069
ABTB1	0.0420689	0.16156	0.221469	0.0809791	0.162625	0.119636	0.106928	1.25501	0.0950916	0.0884993	0.117212	0.163172	0.166536	0.0615037	0.10886
IFITM2	0.947699	1.35555	1.49128	1.81789	1.41556	1.32516	2.06757	4.37493	0.920287	1.72542	0.761999	1.84889	1.64296	0.820037	1.27356
PHC2	0.227254	0.391462	0.165423	0.136191	0.199968	0.147898	0.139413	1.81367	0.4432	0.468513	0.511189	1.02403	0.16363	0.129666	0.146973
CXCL8	0.0509804	0.0722413	0.121328	0.0116393	0.0278961	0.0233372	0.0750789	1.81394	0.266616	0.576013	0.377168	0.319992	0.173902	0.0335376	0.0204014
GCA	0	0.0899903	0.0638201	0.0197025	0.0544918	0.0221848	0.0126988	1.14448	0.319146	0.383147	0.181143	0.524775	0.169865	0.0570979	0.0377428
LITAF	0.737607	0.953868	0.751356	1.36992	0.602922	0.576451	0.76516	3.0085	0.786445	1.27825	1.32646	1.34622	1.36015	0.634239	0.644003
RNF149	0.35819	0.341941	0.434597	0.326469	0.314417	0.373452	0.223297	2.03119	0.476145	0.749489	0.539577	1.27853	0.280518	0.114572	0.339832
MBOAT7	0.122026	0.152433	0.110654	0.0623579	0.233191	0.0957409	0.115167	1.28222	0.0894096	0.442128	0.191149	0.48906	0.728685	0.0561236	0.0733516
ALOX5AP	0.27785	0.575191	0.541742	0.425199	0.424758	0.619242	0.781618	2.39033	1.94724	0.560478	0.725026	0.427857	1.67519	0.356307	0.844815
XCL2	0.208077	0.188128	0.546053	0.304094	0.0493277	0.021808	1.51234	0.0118953	0	0.0203449	0.019153	0.00928871	0.0212347	0.0493046	0.482915
KRT86	0.0929178	0.00569873	0.203745	0.00637526	0.0356878	0.00358716	0.558386	0.0156666	0	0.00788116	0.00723803	0.00201405	0.00384644	0	0.0391896
XCL1	0.366983	0.302332	0.408771	0.222534	0.16514	0.0639834	1.72604	0	0.0407089	0.0446178	0.0397526	0.0245072	0	0.0486575	0.6819
SH2D1B	0.053208	0.0443775	0.0543466	0.104921	0.00926075	0.0024094	0.499904	0.0293062	0	0.00543955	0.00679444	0.0474172	0.00865709	0	0.00397501
NCR1	0	0.054789	0	0.12076	0.0107277	0.000992548	0.319488	0.0198274	0	0.00545263	0.00254355	0.010473	0.00844914	0.00384156	0.0120166
TMIGD2	0	0.0496771	0	0.0634911	0.0043311	0.0729379	0.368356	0	0.11702	0.00645046	0.00667323	0.005677	0.0108513	0.0098251	0.0297534
MATK	0.0367103	0.205979	0.357452	0.427693	0.0619317	0.085976	0.694116	0.0522152	0.020633	0.0391256	0.154225	0.0407165	0.168099	0.0351849	0.251292
TOX2	0	0.0347617	0.327483	0.00960277	0.306403	0.0141509	0.274184	0.0114953	0.0650024	0.009023	0.00625981	0.00449106	0	0.0236085	0.0406473
EOMES	0	0.137716	0.340661	0.249031	0.0435505	0.0791831	0.543056	0.0534128	0	0.00987159	0.0174653	0.0126659	0.0149726	0.00819487	0.312369
CMC1	0.122595	0.153956	0.147326	0.178081	0.160695	0.0849253	0.502908	0.0305397	0.0180729	0.085923	0.0779308	0.104116	0.0727443	0.0432338	0.133353
NFKBIA	1.251	1.64209	1.64014	1.10918	1.83875	1.80061	2.51584	1.83063	1.24579	1.46557	1.35905	1.74763	3.21713	1.00999	1.3311
HOPX	0.113638	0.4363	0.31218	0.946716	0.121034	0.25532	0.926111	0.0380053	0.0547158	0.06081	0.0333331	0.0447491	0.024556	0.164416	0.642668
ID2	1.03865	1.23076	1.56953	1.70095	1.09604	1.13616	2.01785	0.275994	0.587635	0.929882	0.879549	1.10494	1.92298	0.159935	1.69199
TNFAIP3	0.688405	0.965634	1.46597	0.7942	1.81829	1.59594	1.84992	0.614553	0.442693	1.00998	0.561931	0.873932	2.22725	0.360296	1.36063
IFITM1	0.117532	0.368036	0.885286	0.914363	0.753071	0.545445	0.906492	0.183614	0.104064	0.294985	0.0992159	0.220147	0.180575	0.264364	0.54262
SAMD3	0.0536842	0.110116	0.606221	0.34046	0.12453	0.111538	0.385256	0.00724763	0.0633547	0.0227748	0.0244635	0.00956586	0.0235417	0.0249242	0.235666
MAFF	0.147396	0.113161	0.0543466	0.103595	0.0173192	0.0503896	0.382199	0.143357	0.107893	0.238392	0.13879	0.161776	0.185346	0.0297801	0.0875275
CHST12	0.156044	0.256024	0.702769	0.432573	0.158142	0.118912	0.488585	0.0277416	0.335093	0.0855084	0.0948576	0.106453	0.473291	0.0761652	0.320714
HSPA1B	0.0452448	0.0701144	0.646179	0.164192	1.04123	0.373732	0.810668	0.0323017	0.414255	0.32685	0.311004	0.561092	0.549941	0.5661	0.32261
MAP3K8	0.06478	0.182049	0.127313	0.107663	0.0606519	0.0359372	0.489393	0.161333	0.676337	0.755855	0.295496	0.565132	0.237221	0.169269	0.0778459
CCL3	0.0817299	0.284338	1.10672	0.526087	0.149472	0.0507225	0.763214	0.105028	0.486904	0.371903	1.06014	0.350868	0.0583652	0.135632	0.362102
CCL3L3	0.0711905	0.148408	0.152134	0.145817	0.049762	0.0206154	0.32509	0.553465	0.0443072	0.150096	0.301232	0.1812	0.023843	0.0486549	0.189507
DNAJB1	0.558121	0.723213	0.982248	0.801217	1.50117	1.28956	1.2901	0.525366	0.520834	0.618938	0.519286	1.04103	1.12355	0.949555	1.13689
EEF1A1	3.48272	1.52036	2.58534	3.12903	3.5092	4.01979	3.14034	0.479215	2.55409	2.81974	2.7178	2.88666	3.53015	3.9563	3.22635
TPT1	3.98796	4.14804	2.88915	3.75044	4.14136	4.77714	4.05535	2.7733	4.16055	4.32062	3.81785	4.10506	4.00059	4.41396	3.93407
TRBC2	0.625943	1.19444	2.41783	1.63346	2.51325	2.02127	0.68861	0.223446	0.313911	0.2948	0.242891	0.183218	0.116382	0.670025	2.05966
TOMM7	1.71735	1.60158	1.21132	1.33629	1.56961	2.06172	1.1375	0.212408	1.68112	1.33622	0.984646	1.33571	1.51737	1.83846	1.5237
AQP3	0.224994	0.204827	0.4075	0.0557328	0.387084	0.47451	0.112118	0	0.140705	0.0351817	0.028287	0.0145355	0.112969	0.0381789	0.193858
EEF1B2	1.24685	1.12581	0.90025	1.0658	1.20238	1.94998	1.12555	0.209496	1.74889	1.67775	1.16777	1.39402	1.47322	2.31793	1.17848
LDHB	0.426196	0.603283	1.049	0.478383	0.903203	1.17971	0.509829	0.0832157	1.17311	0.55205	0.431585	0.367527	1.01453	0.51196	0.624976
GLTSCR2	1.47908	1.42138	0.510007	0.979369	1.22407	1.69819	1.08988	0.087361	1.20244	1.15226	0.70339	0.944106	1.46163	1.93802	1.05279
CD48	0.635926	0.995055	0.695717	1.42322	1.18009	1.6194	0.999013	0.127287	0.621423	1.02758	0.492271	1.36392	0.532365	1.49437	1.33501
EEF1D	1.27207	1.06569	1.13899	1.00048	1.1578	1.55805	1.09424	0.402741	1.02404	1.2503	0.793243	1.11921	0.935543	1.3678	1.10831
NBEAL1	1.24047	0.597141	0.638111	0.778227	0.888842	1.39469	0.825308	0.0929563	0.92606	1.1972	0.763164	1.02599	1.26536	1.6065	0.88926
SARAF	0.870274	0.887874	1.08025	0.739462	1.15407	1.48613	0.837463	0.913	0.867792	1.15042	0.882525	0.991442	1.20154	0.717503	1.17996
AC090498.1	0.500083	0.113976	0.314011	0.390295	0.756097	1.06803	0.630314	0.246906	0.517682	0.649678	0.399286	0.611679	0.709806	1.01095	0.763385
RORA	0.209169	0.310543	0.160663	0.30652	0.471698	0.482374	0.217711	0.0349205	0.11949	0.0342527	0.0212365	0.0270303	0.0622861	0.0796195	0.380031
FAM102A	0.42891	0.618261	0.555583	0.127334	0.374488	0.663586	0.245458	0.0658152	0.140505	0.0932562	0.0700874	0.0497641	0.380206	0.3277	0.634933
SYNE2	0.694774	0.589442	0.409689	0.75579	0.653005	0.634153	0.266522	0.170549	0.0353513	0.0626273	0.0519182	0.0702801	0.0560359	0.123674	0.505516
LDLRAP1	0.198368	0.16922	0.303147	0.134615	0.104255	0.337111	0.127855	0.0159212	0.0502088	0.0674331	0.0567496	0.0536159	0.0645793	0.0937585	0.217264
TOB1	0.698732	0.599936	0.368637	0.523495	0.510664	0.806365	0.272385	0.262327	0.263881	0.480724	0.170101	0.343298	0.453899	0.159474	0.705905
LEPROTL1	0.456643	0.514103	0.43939	0.300376	0.590285	0.761311	0.474975	0.172486	0.126608	0.353152	0.248746	0.340994	0.484256	0.0933352	0.648244
ERN1	0.304033	0.315405	0.219357	0.178434	0.147474	0.391672	0.202364	0.140801	0.145465	0.0933611	0.0757804	0.0923618	0.165852	0.0591133	0.280504
CTD.2192J16.22	0.425813	0.691574	0.328503	0.522484	0.503206	0.767873	0.375667	0.0158879	0.377523	0.569413	0.305032	0.493825	0.508212	0.60447	0.455187
NOSIP	0.183913	0.179636	0.385382	0.131143	0.128007	0.296976	0.12692	0.0696554	0.0827857	0.105569	0.0843055	0.088885	0.161345	0.0911566	0.12841
LAYN	0	0.0124573	0.0628641	0	0.333208	0.00288681	0.00424824	0	0	0.0189771	0.00328653	0.00742064	0.00503869	0	0.00157129
IKZF4	0	0.032246	0	0.00527974	0.429249	0.0210434	0.0210536	0	0	0.0146729	0.020449	0.0159176	0.0285272	0.0100006	0.00839926
AC133644.2	0.0368889	0.00958757	0.0644197	0.0313634	0.475612	0.0370322	0.0125407	0.0200856	0	0.00932499	0.0153456	0.0191794	0.00916922	0	0.0509817
TBC1D4	0.0747775	0.147919	0.179995	0.0350899	0.895455	0.151954	0.0224894	0.0125755	0.230161	0.0860588	0.125047	0.046027	0.119289	0.0137898	0.0596531
GADD45A	0.0819759	0.138555	0.331101	0.0468499	0.611503	0.153671	0.114515	0.0623021	0.0872614	0.0529608	0.047663	0.047835	0.1646	0.0637354	0.0958413
EPHX2	0.0496696	0.079674	0.0835055	0.0164052	0.290178	0.0566846	0.0266937	0	0	0.00838108	0.00353458	0.00777849	0.00873279	0.0225562	0.0284461
TRAF1	0.0640131	0.0995057	0.144526	0.0466153	0.48459	0.13416	0.0546856	0.0160853	0	0.0540222	0.0254096	0.0515932	0.0690347	0.0132266	0.132745
CARD16	0.0458078	0.136014	0.551447	0.18863	0.728554	0.13509	0.135594	0.306246	0.141545	0.337198	0.165078	0.568634	0.0537847	0.0553119	0.137804
DNPH1	0.0291384	0.108658	0.126898	0.0387782	0.515577	0.127536	0.0795659	0	0.0722716	0.134937	0.194707	0.140909	0.0614764	0.0983868	0.0812479
TRGC2	0.305322	0.241584	0.33321	0.988474	0.103048	0.143354	0.239764	0.0157892	0	0.0297691	0.0279371	0.00820379	0.00655964	0.0155312	0.773205
ZNF683	0.139354	0.229865	0.0630524	0.434163	0.0727521	0.0558598	0.426164	0.0100942	0	0.0388403	0.0265607	0.0166424	0.00790626	0.00919161	0.64043
ITGA1	0.148158	0.257553	0.0658485	0.0620959	0.0899807	0.072579	0.133309	0.00746893	0	0.0353066	0.0298862	0.0263211	0.00717277	0.0160302	0.517745
AC092580.4	0.194601	0.178396	0.280752	0.486716	0.0953546	0.245942	0.246503	0.0147867	0.0319358	0.0288029	0.0237037	0.020319	0.00480989	0.0357378	0.52149
IKZF3	0.496667	0.624196	0.730806	0.695329	0.637395	0.662957	0.618496	0.0507982	0.291957	0.0784785	0.082578	0.0704763	0.483952	0.809353	0.906313
THEMIS	0.139973	0.134592	0.171126	0.230591	0.0913842	0.20057	0.0380238	0.0161809	0.0407914	0.0158398	0.0169407	0.00626352	0.00832831	0.0145573	0.302569
CCL4L2	0.159226	0.398656	0.218123	0.739502	0.119787	0.0357081	0.448619	0.39425	0.390071	0.140798	0.249566	0.0737586	0.214604	0.0256015	0.593357
ITGAE	0.121331	0.149195	0.081071	0.064162	0.156289	0.128749	0.307375	0.0918919	0.16524	0.123733	0.100335	0.131607	0.116775	0.156559	0.39962
PARP8	0.178097	0.331208	0.31491	0.391263	0.175586	0.370926	0.495266	0.248337	0	0.146928	0.137311	0.185344	0.0282658	0.108537	0.557935
EMB	0.379674	0.321451	0.616383	0.442891	0.467264	0.6139	0.445565	0.0967608	0.532096	0.279407	0.223542	0.205629	0.0733915	0.285949	0.691637
TUBA4A	0.160233	0.366863	1.41675	0.47031	0.313896	0.442418	0.281698	0.694236	0.096493	0.107707	0.0681355	0.150118	0.046235	0.233355	0.53064
FGFBP2	0.0908833	0.27691	0	1.81958	0.00905688	0.0130374	0.0813153	0.0535522	0	0.0349186	0.0185779	0.0107578	0.0252255	0.00845146	0.0338374
ADGRG1	0.279748	0.375392	0	1.33874	0.0754255	0.0122418	0.26043	0.0360905	0.0215327	0.0244497	0.0585968	0.0345683	0.0241625	0.023487	0.136439
SPON2	0.255103	0.549096	0	1.04423	0.0952265	0.183096	0.133039	0.0513492	0.548404	0.0539687	0.103086	0.0406651	0.0387423	0.0249791	0.174972
FLNA	0.961882	1.60173	1.98122	2.86809	1.61477	1.29878	1.20823	0.573733	1.15266	1.52526	1.17705	1.87213	0.520354	0.920247	1.45178
CX3CR1	0	0.246231	0	0.987637	0.0573489	0.0118206	0.0145957	0.0549429	0.09746	0.334184	0.447712	0.445945	0.0286894	0.00894323	0.0404385
MYOM2	0.0503547	0.056347	0	0.339729	0.0226754	0.00773666	0.043756	0.0138518	0.0624558	0.024416	0.0110813	0.00801043	0.00907461	0	0.0061636
PRSS23	0.354725	0.346505	0	0.412576	0.0128263	0.0036732	0.0278217	0	0	0.0144031	0.0200237	0.0231062	0.0325936	0.0108243	0.0203207
FCRL6	0	0.0414007	0.134541	0.414233	0.0117871	0.0130875	0.0586269	0	0	0.012117	0.0117036	0.00763246	0.00809358	0	0.112575
B3GAT1	0	0.0205015	0	0.262499	0.0152195	0.0118569	0	0	0	0.00109114	0.00463417	0.0097028	0.00400686	0.00689224	0.0271527
KLF2	1.04367	1.99577	0.906849	2.68448	1.17518	1.6088	1.69713	1.67458	0.928504	1.1903	1.16789	2.07901	1.4291	2.76827	0.854998
TGFBR3	0.120747	0.5803	0	0.639642	0.0800177	0.123692	0.241831	0.0157219	0	0.0281292	0.0339185	0.0212233	0.026272	0.025804	0.157748
EFHD2	0.237595	0.571048	0.728742	1.61391	0.83998	0.30172	0.739695	1.32548	0.682409	1.18694	0.739265	1.42474	0.48933	0.209827	0.435089
RUNX3	0.565374	0.691401	1.08947	1.4941	0.773726	0.610803	0.942633	0.148581	0.34486	0.313551	0.218197	0.257265	0.332899	0.450841	0.91678
ARL4C	0.573895	1.02548	1.18971	1.90458	0.906687	1.18022	0.860943	0.161336	1.20278	0.958151	0.548441	0.360963	0.166734	0.267542	1.1953
ADGRE5	0.651751	0.910036	1.62977	1.76864	0.683367	0.794705	1.07032	1.25287	0.541227	0.698367	0.607643	1.35712	0.803856	0.321647	1.02109
ITGAL	0.331539	0.40576	1.17388	1.23478	0.650537	0.545711	0.71131	0.373197	0.483465	0.274716	0.188881	0.593672	0.0942315	0.175455	0.71705
SUN2	0.630457	0.896063	0.76443	1.60964	0.732629	1.00118	0.947529	0.213844	0.256706	0.454453	0.349829	0.559756	0.302777	0.442302	1.0615
C1ORF21	0.210498	0.158304	0	0.306992	0.01505	0.0117322	0.114864	0.0122754	0	0.0215412	0.0441112	0.0321266	0.0922298	0.00741295	0.0356411
CCND3	0.186082	0.664185	0.780454	1.25858	0.447694	0.679437	0.636243	0.471077	0.606004	0.427958	0.232572	0.598688	0.313191	0.427138	0.646886
SPN	0.319974	0.44889	0.657119	1.12944	0.496712	0.486203	0.608769	0.0566775	0.916829	0.438888	0.261139	0.618294	0.660729	0.0503569	0.501456
ABHD17A	0.340083	0.279609	0.45401	0.890564	0.441672	0.352155	0.417832	0.149277	0.187059	0.238437	0.205279	0.277567	0.265707	0.169297	0.437386
GNG2	0.143359	0.298914	1.11335	0.811294	0.513258	0.33681	0.40135	0.235195	0.234074	0.217774	0.157889	0.278042	0.322996	0.119894	0.431254
RAP2A	0.194342	0.151357	0.20463	0.477405	0.111653	0.0503523	0.057908	0.00664673	0.074782	0.302473	0.231503	0.126061	0.253462	0.0554235	0.0863224
PIM1	0.150632	0.647695	0.771214	0.857868	0.437882	0.590513	0.51833	0.237086	0.122146	0.198556	0.148761	0.338578	0.134091	0.0891146	0.489313
RRM2	0	0.00824109	1.77177	0.00531564	0.014908	0.000913344	0	0.00847146	0	0.0150474	0.0205817	0.00654988	0.023923	0.00397299	0.00464853
TOP2A	0	0.00905079	1.65629	0.00407512	0.02007	0.00732813	0.00595259	0	0	0.0200768	0.0269878	0.0174303	0.0222302	0.0105095	0.00639313
UBE2C	0	0.0139364	1.09969	0.00615659	0.0127831	0.00104758	0.00896841	0.0123846	0	0.00527982	0.0179979	0.0102885	0.0168522	0.00920203	0.00175834
BIRC5	0	0.00856705	1.09049	0.00327141	0.0145123	0.00126083	0	0	0	0.0109595	0.0163146	0.00624437	0.0241341	0.00385514	0.00171709
PKMYT1	0	0.00196946	0.678127	0.00183653	0	0	0.00204924	0	0	0.00121631	0.00423241	0.00242968	0.00672954	0	0
NUF2	0	0.0172125	0.852433	0.0123266	0.0103518	0.00249343	0.00801161	0	0	0.00118293	0.00977699	0.00252175	0.0118479	0	0.00746255
TYMS	0	0.0111484	1.46597	0.0120846	0.0145201	0.00331474	0.0270374	0	0.0228076	0.017092	0.0314689	0.00778452	0.0599592	0.00459085	0.00939093
MKI67	0	0.00568433	1.2313	0.00298826	0.0203249	0.00381645	0.0201439	0	0	0.0155836	0.0387697	0.0117238	0.0216802	0.00415371	0.00834423
NUSAP1	0	0.0138609	1.55796	0.0112698	0.0633953	0.011723	0.00260635	0	0	0.0257937	0.029464	0.0363037	0.0257793	0.00946759	0.0106676
CCNA2	0	0.00681058	0.893829	0.00396861	0.00754063	0.00209982	0	0.0151257	0.069757	0.00327465	0.0187675	0.00755863	0.0121376	0	0.00950874
ZWINT	0	0.0171907	0.875129	0.00562671	0.00962764	0.00643684	0.0131393	0	0	0.00568667	0.0291354	0.00218004	0.0166523	0	0.00326523
KIAA0101	0	0.00341699	1.13216	0.00378447	0.0145043	0.00105365	0.024231	0.0240207	0.0360761	0.0196427	0.0281363	0.00442246	0.0249633	0.00447834	0.00902014
CDCA8	0.0346649	0.00842515	0.663927	0.00917108	0.0127	0.00191892	0	0	0	0.00577146	0.00993994	0.00541677	0.00271783	0.00410958	0.0040387
TPX2	0	0.0100637	0.768391	0.0111173	0.0227664	0.00226466	0.0116244	0	0	0.00606376	0.0184928	0.00496961	0.0248908	0	0.01064
SPAG5	0	0.010106	0.727793	0.00337282	0.0311349	0.000752835	0.00500113	0	0	0.0135809	0.0126464	0.0186524	0.0246131	0.00774828	0.00456528
KIFC1	0.104849	0.0110695	0.654247	0.00954908	0.0139906	0.00176258	0.00260635	0	0	0.00421005	0.00799605	0.0038411	0.0140555	0	0.0024421
CDKN3	0	0.0058342	0.749851	0.0079869	0.039355	0.00433233	0	0.0126061	0	0.0123182	0.0104625	0.0113898	0.0263223	0	0.00863356
CENPF	0	0.022015	0.877656	0.0100698	0.025406	0.0119538	0.00939928	0.00989344	0	0.0166851	0.0292555	0.00405881	0.0108182	0.00495464	0.0180256
PRC1	0	0.0450487	0.816731	0.00770286	0.0255717	0.0167236	0.00448486	0	0.020633	0.0373412	0.0298189	0.0273683	0.0276402	0.00362113	0.0132098
STMN1	0.264685	0.276554	3.10964	0.11553	0.155015	0.0697546	0.175022	0.0174623	0.604729	0.301994	0.418147	0.0709738	0.925806	0.109809	0.103428
CKS1B	0.0769084	0.0764782	0.834808	0.0296652	0.06404	0.0308638	0.0148937	0	0.165846	0.0563524	0.0671395	0.0467929	0.0847257	0.021982	0.0318693
FANCI	0.0876887	0.0125529	0.544828	0.0104681	0.023851	0.0174176	0.0134622	0.0139733	0	0.0266542	0.011873	0.00392503	0.0365167	0.00847663	0.0163857
SMC4	0.11912	0.0911945	1.05059	0.0479837	0.153416	0.0677315	0.148723	0.0393393	0.204549	0.0872538	0.0679773	0.0932026	0.212012	0.0525625	0.0946251
PCNA	0.189989	0.16097	1.7013	0.168956	0.255887	0.118987	0.174368	0.0191895	0.214439	0.150723	0.142492	0.113504	0.134548	0.109465	0.131598
NCAPG2	0.0811843	0.0329804	0.653166	0.0975631	0.0156371	0.0385063	0.0193474	0	0	0.0223093	0.0315959	0.0262575	0.0428415	0.00453279	0.0185258
PHF19	0.221136	0.118603	1.16127	0.0773286	0.305496	0.117358	0.0681326	0.0108175	0.0819617	0.147913	0.0790494	0.175821	0.0809106	0.0300723	0.0951503
LMNB1	0.0987049	0.0485735	1.01559	0.0384571	0.155099	0.0564876	0.10919	0.272902	0.0547433	0.167249	0.05626	0.181525	0.227688	0.0594104	0.0524213
TMPO	0.183084	0.189816	1.54339	0.216504	0.377952	0.198598	0.15444	0.029093	0.178028	0.202164	0.150141	0.387593	0.161388	0.273121	0.216301
H2AFX	0.179676	0.192693	1.07852	0.129541	0.113507	0.0835546	0.188779	0.0251156	0.164681	0.109829	0.0666781	0.0516999	0.234336	0.112994	0.106067
SAC3D1	0	0.0387098	0.618306	0.0161508	0.0241802	0.0277571	0.0151727	0	0.0738482	0.0473674	0.0405952	0.0459147	0.0207182	0.0252861	0.0179713
NCAPD3	0.0333977	0.0448506	0.569247	0.0237792	0.0152135	0.0308102	0.0500641	0	0	0.0447271	0.0380098	0.0314357	0.0441722	0.0130935	0.0326247
HMGB2	0.676738	0.493585	2.79683	0.385415	0.660817	0.511967	0.360719	0.391438	0.320496	0.550865	0.311694	0.770207	0.525537	0.380466	0.583116
H2AFZ	0.370815	0.33066	2.19011	0.359139	0.534163	0.325187	0.301189	0.377891	0.390662	0.499062	0.455512	0.517242	0.529457	0.233942	0.365633
TUBA1B	1.16402	1.17698	4.22322	0.712171	0.783989	0.636488	0.703198	0.36967	1.55195	2.06892	2.00149	1.48311	1.34065	0.647538	0.622524
DUT	0.285862	0.327431	1.48774	0.23609	0.240681	0.249781	0.201228	0.095528	0.330403	0.257409	0.21432	0.225797	0.250253	0.205165	0.239658
RRM1	0.200205	0.096499	0.915434	0.137325	0.103713	0.108714	0.0886141	0.0296867	0.145759	0.112676	0.116222	0.106755	0.120317	0.0576798	0.0751152
MCM7	0.141266	0.127927	0.816421	0.0949625	0.120054	0.0609943	0.0927258	0.0126494	0	0.0932892	0.0595613	0.0616979	0.170837	0.0800813	0.0708003
H2AFV	0.228881	0.482331	2.07292	0.351615	0.525631	0.396875	0.354748	0.231794	0.664457	0.498877	0.409449	0.520045	0.611478	0.268218	0.418826
HIST1H4C	0.547989	0.696917	2.45405	0.512757	0.424661	0.568546	0.483308	0.0534919	0.380458	0.356995	0.283714	0.184727	0.884512	0.643137	0.529918
DNAJC9	0.152676	0.100135	0.869011	0.077813	0.114973	0.0937999	0.0916617	0	0.148725	0.0764176	0.0839896	0.058258	0.262129	0.0656555	0.119781
IDH2	0.328227	0.218923	1.74828	0.360298	0.234011	0.232552	0.284113	0.0532652	0.355544	0.425786	0.365546	0.380712	0.250598	0.154877	0.381705
TUBB4B	0.537871	0.297256	1.29305	0.247141	0.247341	0.186495	0.245413	0.0948534	0.341332	0.325539	0.306979	0.315591	0.586648	0.209791	0.193199
TUBA1C	0.314453	0.232507	1.15557	0.136225	0.298133	0.119855	0.135465	0.0238258	0.480734	0.411432	0.426304	0.325896	0.270388	0.0672557	0.11977
HMGB1	1.05541	0.818544	2.53122	0.810977	0.762135	0.810115	0.808423	0.282295	0.99367	0.82411	0.757548	0.749329	0.924331	0.811692	0.918984
IGFBP7	0.238973	1.84995	0.100595	0.212731	0.0839016	0.0490852	0.122614	0.0893591	0.335963	0.239253	0.125262	0.270346	0.136998	0.0516433	0.0505836
HBB	0.0414096	1.49836	0	0.0809278	0.0272271	0.0217025	0.0189483	0.0336816	0	0.0326467	0.0322788	0.0330982	0.0628723	0.030989	0.0183962
MGP	4.22804	2.16775	0.0900891	0.2111	0.0452914	0.123535	0.0874285	0.0766008	0.32533	0.181985	0.117882	0.107923	0.132208	0.0855616	0.107993
APOD	0.234743	1.43391	0	0.106714	0.0131895	0.029851	0.0211098	0.0128339	0.0407914	0.015409	0.0314515	0.0575021	0.0463547	0.0359027	0.0493131
IGFBP4	1.2266	1.19561	0.105808	0.0659529	0.0500217	0.0725748	0.286064	0	0.0815002	0.0746108	0.144845	0.0524523	0.0578525	0.0369052	0.0561531
AQP1	0.165721	0.809387	0	0.0544826	0.0180127	0.0176572	0.0204679	0.00528446	0.152528	0.0221174	0.0320733	0.0465699	0.0246657	0.0323223	0.0235849
STC2	1.55413	0.922343	0	0.0695668	0.0109036	0.0143847	0	0.0137078	0	0.0130093	0.0113947	0.0170909	0.00837651	0.0153221	0.0189784
ACKR1	0.119122	0.705306	0	0.0600447	0.0122489	0.0173313	0.00450808	0	0.0556176	0.0167451	0.0183497	0.0170812	0.0133248	0.00542636	0.0161034
ADIRF	0.528109	0.765033	0	0.0430473	0.0191316	0.0115545	0.00446957	0.0207031	0	0.00879236	0.0192136	0.0206735	0.0330467	0	0.0187334
CCL21	0.268955	0.675457	0	0.0437458	0.00472113	0.0113729	0.00478446	0.0127629	0.192885	0.0211985	0.0106508	0.00822899	0.0466614	0	0.0168447
CYR61	0.083918	0.664226	0	0.0177479	0.0120974	0.0159628	0.0193154	0.0176925	0.0622416	0.0315856	0.0211542	0.00979004	0.0163967	0.0168539	0.0104377
CRISPLD1	0.478684	0.644805	0	0.0246517	0	0.0116453	0.00505454	0	0	0.0111915	0.00730245	0.00215691	0.0433764	0.0053661	0.0089552
CAV1	0.078924	0.58864	0	0.0423907	0.0139733	0.00740762	0.0114086	0.0113445	0.0407914	0.0230991	0.0255876	0.0187428	0.0203464	0.00856967	0.0115879
C10ORF10	0.121507	0.590402	0	0.0416111	0.0217287	0.00975659	0.012523	0	0.0685371	0.0243131	0.0111763	0.0259431	0.0056401	0.0139375	0.00929624
NR2F2	0.356755	0.533029	0	0.0142213	0	0.0070177	0.00446957	0	0	0.0169004	0.0159791	0.0099974	0.0372775	0.0130531	0.00743434
TM4SF1	0.735186	0.535634	0	0.0313652	0.0142941	0.0101673	0.0105471	0.00891875	0.166779	0.0167591	0.0153987	0.0186982	0.0323074	0.0106433	0.0155666
SFRP2	0	0.491788	0	0.0170241	0.00472113	0.00565166	0.00516437	0.0453249	0	0.0231816	0.0210421	0.01523	0.0123158	0.00563972	0.0123978
EFHD1	1.10182	0.527418	0	0.0360333	0.0038239	0.00997124	0.00739235	0.013187	0	0.00397406	0.0168284	0.00705877	0.0202629	0.00895556	0.00936556
CALD1	0.0966866	0.498255	0	0.0506616	0.0041605	0.0147277	0.00561118	0	0.113607	0.0393857	0.0200387	0.0222345	0.0216342	0.0101003	0.0145169
AGR2	1.00531	0.452809	0	0.0194928	0.00534034	0.0107127	0	0.0116521	0	0.00848089	0.0109159	0.0105015	0.0170655	0.0150501	0.0124843
POSTN	0	0.427918	0	0.0163227	0	0.00206902	0.0142814	0.0128535	0.163591	0.0467481	0.0250989	0.0124953	0.00367769	0.010347	0.00451984
TFF3	0.264755	0.467012	0	0.0355456	0.0182085	0.0159168	0.0103248	0	0.0407089	0.0100732	0.0139884	0.015024	0.0278678	0.00450213	0.0151944
TIMP3	0.349915	1.2465	0.184932	0.0923697	0.0369387	0.0631702	0.0216657	0.0218771	0.298416	0.090115	0.462158	0.0492666	1.01027	0.0995243	0.0659053
SPARC	0.10619	1.15931	0.0630524	0.0581609	0.0381491	0.0359391	0.061698	0.0273105	0.249311	0.155407	0.434077	0.146644	0.187682	0.0307349	0.0456667
CFD	0.286724	1.32733	0.160718	0.13665	0.044401	0.0625823	0.0383691	0.55852	0.322006	0.311064	0.665344	1.25282	0.11863	0.0911592	0.0530012
PTRF	0.0973257	0.501735	0	0.0267338	0.00484813	0.0156927	0.00974926	0	0.137061	0.0355995	0.0693096	0.0245157	0.438266	0.0137017	0.00988602
FLNB	1.08023	0.609688	0.188812	0.0470594	0.14541	0.0578581	0.102673	0.0205771	0.560887	0.0569804	0.0770875	0.0811532	0.284638	0.0558047	0.0514512
SERPING1	0.361369	0.852104	0	0.0567811	0.0194171	0.0151671	0.0292816	0.0435208	0.463083	0.337055	0.509072	0.20495	0.0412975	0.0316121	0.0234332
AZGP1	2.31588	0.395997	0	0.0228048	0.00412493	0.0198661	0.0144629	0	0.0407914	0.0136668	0.0119456	0.00533054	0.0395492	0.00558693	0.00812914
WFDC2	0.805152	0.0527221	0	0	0	0.00218252	0	0	0	0.00227237	0.00072551	0	0.00419087	0	0.00265016
VTCN1	0.691014	0.0801744	0	0.00591486	0	0.00105694	0.00478446	0	0	0.00221564	0	0	0	0	0.00102795
NTN4	0.766588	0.0384627	0	0.00842713	0.0207309	0.0102356	0	0	0	0.00763408	0.0039961	0	0.00381937	0	0.00192578
PTN	0.517938	0.0371171	0	0	0	0.00318049	0	0	0	0.00242455	0.000469072	0	0.00679994	0	0.000864075
NOVA1	0.838525	0.167034	0	0.00239992	0	0.0044842	0.00540507	0	0	0.00159716	0.00705474	0	0	0.00574366	0.00207853
STAC2	0.581857	0.047094	0	0.00274463	0	0.00378885	0	0	0	0.00571879	0.00296819	0.00671795	0	0	0.00289088
KRT18	1.1488	0.313918	0.0543466	0.013803	0.0153432	0.0186636	0.00998177	0.0219297	0.0387238	0.0109767	0.0161161	0.0145074	0.0176979	0.0157715	0.0130068
DSP	0.888502	0.255624	0	0.00954695	0	0.00510917	0.0144453	0	0.0634893	0.0149298	0.00665707	0.0253052	0.0107	0.0357412	0.00775304
SORBS2	0.617028	0.11302	0	0.018298	0	0.0022459	0	0	0	0.00605464	0.00477856	0.0107226	0	0.0254044	0.00288994
ERBB3	1.10512	0.276478	0.0610209	0.0214733	0.00386918	0.0154861	0.00526448	0.0220343	0	0.0122345	0.0146892	0.0123128	0.0192801	0.00983728	0.0141411
ELF3	0.642692	0.140799	0	0.00968909	0	0.00553004	0	0	0	0.00550429	0.00701545	0.00756742	0	0	0.00547313
KRT7	0.85074	0.0993808	0	0.00679143	0.0380814	0.00413664	0.0130324	0.0123039	0.110461	0.0182025	0.0130022	0.0365202	0.00520646	0	0.00431235
TACSTD2	0.964065	0.311462	0	0.00783482	0.00935434	0.0141733	0.0115412	0.0492078	0	0.0129614	0.0183006	0.0193639	0.00812846	0	0.0054534
LINC00993	0.717483	0.225846	0	0.00279587	0	0.0022324	0	0.0127629	0	0.0036696	0.0139484	0.00228925	0.00879175	0.0112563	0.00414329
PTPRF	0.732042	0.199307	0.0707011	0.0129019	0.00399978	0.0100362	0.00453957	0.0198887	0	0.0113731	0.00571119	0.0109148	0.012701	0.00993921	0.0114006
KRT8	0.634285	0.152388	0.0433223	0.0148815	0	0.0103976	0.017078	0.0117777	0	0.0138491	0.00980543	0.00395984	0.0164176	0.00464583	0.00311498
SAA1	0.482684	0.0681128	0	0	0	0.0022532	0	0	0.0487416	0.00211484	0.0124931	0.0168526	0.00965277	0	0.00364793
NFIB	0.7765	0.378996	0	0.00522625	0.00917606	0.0053843	0	0	0.0407914	0.0172074	0.0123844	0.0319971	0.0250432	0.00893226	0.00319587
SLC39A6	1.46847	0.57352	0.341846	0.113322	0.0991955	0.073811	0.0825054	0.0385814	0.307613	0.0969797	0.100231	0.0682832	0.0945253	0.0691502	0.0959568
PERP	1.18953	0.289356	0.322317	0.0635941	0.0830458	0.124598	0.0756291	0.0376844	0	0.0330023	0.0121831	0.0164507	0.0325755	0.0132788	0.15135
KRT15	0.862123	0.28122	0	0.0347615	0	0.00792946	0.0173283	0.0248393	0.102944	0.0201188	0.014182	0.0262052	0.0301097	0.0222757	0.0087556
TRPS1	1.31942	0.421595	0.137267	0.0602547	0.123652	0.0643412	0.0340433	0	0.0368877	0.22959	0.181961	0.218196	0.0723902	0.0432197	0.0867871
HES1	0.850791	0.450068	0	0.0155044	0.0323832	0.00773022	0.0100095	0.0137078	0	0.0403213	0.0727039	0.223205	0.216071	0.0287995	0.00795292
LTF	0.810912	0.278629	0	0.0198001	0.0052966	0.0100061	0.0124762	0.0235659	0.0407089	0.0329539	0.0110513	0.0247783	0.0412221	0.0103288	0.0108238
SFRP1	0.565987	0.252983	0	0.00806231	0.0052021	0.00552904	0	0	0.0465525	0.0163719	0.0076095	0.0197901	0.0187157	0.00941318	0.0043792
MAGED2	1.45216	0.479241	0.116839	0.203492	0.223427	0.146849	0.204584	0.0199643	0.254813	0.141196	0.224024	0.175286	0.502346	0.097235	0.282599
CITED4	0.626784	0.161165	0.0644197	0.0365599	0.0801182	0.064138	0.0427594	0.0608638	0.0866866	0.0671817	0.0398798	0.0951519	0	0	0.0469275
FASN	0.663508	0.175129	0.12295	0.0769579	0.0831113	0.0686547	0.0813209	0.0238834	0.0314133	0.0413726	0.0520264	0.0375603	0.0722775	0.0148006	0.0593912
SPINT2	1.36554	0.648727	0.0835055	0.0413038	0.0639213	0.186788	0.0825763	0.063915	0.565889	0.727318	0.36176	0.353745	0.497872	0.268225	0.0990251
SCGB2A2	0.484171	0.24541	0	0.0269108	0.0099315	0.0114189	0	0.0433107	0.0407089	0.0252055	0.0134484	0.0213687	0.0338187	0.016791	0.00539737
XBP1	2.17385	1.28207	0.150837	0.795576	0.273888	0.484121	0.532584	0.0973189	0.978542	0.514305	0.383986	0.573009	0.703818	0.236133	0.349009
SGK3	0.6328	0.170919	0	0.039335	0.0337946	0.041031	0.0399261	0.0179801	0.092899	0.149873	0.15677	0.172277	0.10796	0.0377453	0.0431758
