# Supplementary material for: From Cellular Infiltration Assessment to a Functional Gene Set-Based Prognostic Model for Breast Cancer
Source: Frontiers journal article supplement (doi:10.3389/fimmu.2021.751530), 2021-10-04
Supplement: Data_Sheet_1.ZIP [file Table_S4.xlsx]

## Sheet: table.24pathway
Table S4. 24 functional gene sets for constructing prognostic model.
Functional gene sets	GENES
GOBP_PROTEIN_LOCALIZATION_TO_PRESYNAPSE	DLG2,DVL1,MAPK8IP3,HSPB1,KIF5A,KIF5B,KIF5C,MAP1A,RAB27B,TERF2,WNT7A
GOBP_MICROTUBULE_BASED_MOVEMENT	HDAC6,KIF28P,ACTR3,ACTR2,KIF20A,DNAL4,LRPPRC,AP3S2,KATNB1,CENPE,KIF1C,ADCY3,AP3M2,KIF2C,IFT27,KIF3A,RABL2B,IFT43,KIF12,CCDC151,SLC26A8,CATSPER1,CATSPER2,SSX2IP,AP3S1,BORCS5,CFAP70,CLN3,TPPP2,CCR6,DNAAF1,KIF19,CCSAP,DNAI3,DNAH14,ARL8A,IQCF1,SLC9B2,DNAAF6,DYNLL2,DNHD1,CFAP251,CFAP54,TEKT5,BICDL2,DNAH2,KIF18B,KLC3,LCA5L,SLC9B1,TEKT4,TTC30B,CCNYL1,ROPN1B,NEK10,CFAP206,CCDC63,DNAAF4,TTLL9,DAW1,BBS12,D…
GOBP_POSITIVE_REGULATION_OF_TRANSCRIPTION_ELONGATION_FROM_RNA_POLYMERASE_II_PROMOTER	TCERG1,SUPT16H,LEO1,BRD4,GTF2F1,CDK12,EAPP,BTBD18,SUPT6H,CDC73,ELL,CDK13
GOBP_EAR_MORPHOGENESIS	USH1C,TSHZ1,SPRY2,SEC24B,SIX2,GJB6,TRIOBP,CTHRC1,OSR2,LRIG3,USH1G,TTC39C,COL2A1,COL11A1,OSR1,MYO3B,DCANP1,GSC,STRC,DLX5,DLX6,DVL1,DVL2,EDN1,EPHB2,EYA1,ALDH1A3,LHFPL5,FGF8,FGF10,FGFR2,FOXG1,FOXI1,FRZB,FZD2,NIPBL,WHRN,TMIE,LRIG1,GATA2,GATA3,GBX2,GLI2,TPRN,HMX2,HOXA1,HOXA2,HPN,HMX3,INSIG1,MSX1,MYO6,MYO7A,NAGLU,ATOH1,NEUROG1,ROR2,TIFAB,OTX1,PAX2,WDPCP,ATP8A2,SIX4,ATP6V1B1,PLS1,MYO3A,PRRX1,POU3F4,POU4…
GOBP_SIGNAL_TRANSDUCTION_IN_ABSENCE_OF_LIGAND	BCL2L10,BCL2L11,COL2A1,CSF2,CTNNA1,DAPK3,DCC,ERBB3,AKT1,EYA4,EYA1,EYA2,EYA3,UNC5B,FGF10,FGFR1,FYN,IFI6,APPL1,GATA1,GDNF,HTRA2,MKNK2,GSK3A,GSK3B,HSPA1A,HSPA1B,FAS,IL1A,IL1B,IL2,IL4,IL7,INHBA,ITGAV,GFRAL,MIR198,MCL1,KITLG,ZC3HC1,WWOX,PF4,PPP1CA,PPP2R1B,STRADB,MAPK7,MAP2K5,BAD,BAK1,BAX,BCL2,BCL2A1,RET,BCL2L1,BCL2L2,MOAP1,SNAI2,BOK,PRDX2,TERT,TNF,CASP2,CASP3,SRPX,CASP9,FADD,BAG3
GOBP_PRIMITIVE_HEMOPOIESIS	ZFPM1,GATA1,GATA2,STK3,STK4,TAL1,VEGFA,THOC5
GOBP_NEUTROPHIL_MEDIATED_KILLING_OF_SYMBIONT_CELL	TUSC2,CTSG,ELANE,F2,F2RL1,ARG1,AZU1,CXCL6
GOBP_GLUTATHIONE_DERIVATIVE_METABOLIC_PROCESS	AKR1A1,GSTO2,ESD,HPGDS,GSTA1,GSTA2,GSTA3,GSTA4,GSTM1,GSTM2,GSTM3,GSTM4,GSTM5,GSTP1,GSTT1,GSTZ1,GSTK1,MGST1,MGST2,MGST3,GSTT2B,GSTO1
GOBP_POSITIVE_REGULATION_OF_SPINDLE_CHECKPOINT	NDC80,GEN1,MAD2L1,DYNC1LI1,PCID2,TPR,XRCC3
GOBP_PROTEIN_LOCALIZATION_TO_NUCLEOPLASM	CCT7,CCT4,CCT2,CCT8,DKC1,CCT5,NOP53,LARP7,WRAP53,MEPCE,TCP1,CCT3,TBRG1,CCT6A
GOBP_DEOXYRIBONUCLEOSIDE_TRIPHOSPHATE_BIOSYNTHETIC_PROCESS	CMPK2,ADK,DTYMK,AK9,TYMS,TBPL1
GOBP_REGULATION_OF_SPINDLE_CHECKPOINT	NDC80,DUSP1,ANAPC15,GEN1,MAD2L1,DYNC1LI1,LCMT1,CDK5RAP2,PCID2,TPR,XRCC3,CDT1,USP44,CCNB1,MAD2L1BP
GOBP_ELASTIN_CATABOLIC_PROCESS	CST3,CTSL,CELA1,MIR181B1,MMP12
GOBP_INFLAMMATORY_RESPONSE_TO_WOUNDING	AGER,F2R,ALOX5,GRN,GIT1,HIF1A,HMOX1,IL1A,MIR17,MIR21,MDK,TGFB1,TIMP1,CCR2,WDR83,SIGLEC10
REACTOME_CREATION_OF_C4_AND_C2_ACTIVATORS	MASP2,FCN1,COLEC11,MASP1,CRP,FCN3,C1QC,C1R,FCN2,MBL2,C1QB,C1QA,C1S,COLEC10,IGKV4-1,IGKV5-2,IGKV3D-20,IGLV6-57,IGLV1-51,IGLV1-47,IGLV1-44,IGLV7-43,IGLV1-40,IGLV3-27,IGLV3-25,IGLV2-23,IGLV3-21,IGLV3-19,IGLV2-14,IGLV2-11,IGLV3-1,IGLC2,IGLC3,IGHG4,IGHG2,IGHG1,IGHV1-2,IGHV2-5,IGHV3-7,IGHV3-11,IGHV3-13,IGHV3-23,IGHV3-33,IGHV4-34,IGHV4-39,IGHV1-46,IGHV3-48,IGHV3-53,IGHV1-69,IGHV4-59,IGKV2D-30,IGKV3-20,I…
REACTOME_REGULATION_OF_TLR_BY_ENDOGENOUS_LIGAND	APOB,GSDMD,GSDME,SFTPA1,LBP,SFTPD,CD36,TLR4,TLR2,S100A8,LY96,S100A1,S100A9,CD14,FGG,FGA,FGB,TLR1,TLR6,SFTPA2,HMGB1
GOBP_ANTIFUNGAL_INNATE_IMMUNE_RESPONSE	RNASE8,DEFB106A,DEFB114,DEFB119,DEFB106B,PLA2G5,RARRES2,FAM3A
GOBP_NAD_BIOSYNTHETIC_PROCESS	NAMPT,AFMID,NAXE,ACMSD,SLC5A8,IDO2,NMNAT2,QPRT,HAAO,NMRK2,NMNAT3,IDO1,NNMT,PARP16,NMRK1,NADSYN1,RNLS,ASPDH,NAXD,PTGIS,PTGS2,NMNAT1,NUDT12,PARP9,PARP10,KMO,KYNU,NAPRT,SLC22A13
GOBP_DNA_DEMETHYLATION	TRIM28,APOBEC2,ALKBH2,APOBEC3D,APOBEC3H,APOBEC3A,APOBEC3F,TET3,ALKBH3,GATA3,APOBEC3C,STPG4,APEX1,APOBEC1,DPPA3,OTUD4,ALKBH4,TET2,AICDA,APOBEC3G,TDG,USP7,FTO,TET1,USP9X,ALKBH1,APOBEC3B,TOX
GOBP_IMMUNOGLOBULIN_PRODUCTION_INVOLVED_IN_IMMUNOGLOBULIN_MEDIATED_IMMUNE_RESPONSE	C17orf99,PARP3,MAD2L2,BATF,SHLD3,EXOSC6,SLC15A4,CCR6,SHLD1,RNF168,GAPT,ERCC1,PAXIP1,SWAP70,CLCF1,MSH6,TBX21,HLA-DQB1,HLA-DRB1,HSPD1,IL2,IL4,IL10,LIG4,MLH1,MSH2,NBN,FOXP3,EXOSC3,KMT5B,SHLD2,RIF1,HMCES,PTPRC,BCL6,XCL1,SUPT6H,BTK,TFRC,TGFB1,TP53BP1,TNFSF4,UNG,NSD2,NDFIP1,KMT5C,TNFSF13,RNF8,EXO1,CD28,IL27RA,CD40,CD40LG,THOC1
GOBP_INTERLEUKIN_21_MEDIATED_SIGNALING_PATHWAY	IL2RG,JAK1,JAK3,IL21R,IL21,STAT1,STAT3,STAT4
GOBP_NEGATIVE_REGULATION_OF_T_CELL_RECEPTOR_SIGNALING_PATHWAY	LILRB4,CD160,DUSP3,PTPN22,GBP1,PHPT1,LGALS3,SH2D1A,PAWR,UBASH3A,PRNP,PTPN2,PTPN6,PTPRJ,CEACAM1,THY1,EZR,LAPTM5,PVRIG,SLA2,DGKZ,CBLB
REACTOME_CD22_MEDIATED_BCR_REGULATION	CD79B,CD22,CD79A,PTPN6,IGKV4-1,IGKV5-2,IGKV3D-20,IGLV6-57,IGLV1-51,IGLV1-47,IGLV1-44,IGLV7-43,IGLV1-40,IGLV3-27,IGLV3-25,IGLV2-23,IGLV3-21,IGLV3-19,IGLV2-14,IGLV2-11,IGLV3-1,IGLC2,IGLC3,IGHD,IGHM,IGHV1-2,IGHV2-5,IGHV3-7,IGHV3-11,IGHV3-13,IGHV3-23,IGHV3-33,IGHV4-34,IGHV4-39,IGHV1-46,IGHV3-48,IGHV3-53,IGHV1-69,IGHV4-59,IGKV2D-30,IGKV3-20,IGKV1D-33,IGKV1-17,IGKV1-16,IGKV1D-16,IGKV3-11,IGKV1-33,IGKV1…
GOBP_MHC_PROTEIN_COMPLEX_ASSEMBLY	HLA-DMA,HLA-DMB,HLA-DRA,HLA-DRB1,TAPBPL,TAPBP,CALR
