# Supplementary material for: From Cellular Infiltration Assessment to a Functional Gene Set-Based Prognostic Model for Breast Cancer
Source: Frontiers journal article supplement (doi:10.3389/fimmu.2021.751530), 2021-10-04
Supplement: Data_Sheet_1.ZIP [file Table_S5.xlsx]

## Sheet: Sheet1
Table S5. Set of genes for characterizing immune activity
EXHAUSTION	ACTIVATION	CELL_CYCLE
PDCD1	IFNG	CDKN2A
CTLA4	TNF	CCND1
LAG3	FGFBP2	CCNE1
TIGIT	PRF1	CDK4
HAVCR2	GZMB	CDK6
CD274	GZMK	RB1
CD27	GNLY	CCND2
PDCD1LG2		CCND3
		CDK2
		E2F1
		E2F3
		SDKN1A
		CDKN1B
		CDKN2B
		CDKN2C
