# Supplementary material for: From Cellular Infiltration Assessment to a Functional Gene Set-Based Prognostic Model for Breast Cancer
Source: Frontiers journal article supplement (doi:10.3389/fimmu.2021.751530), 2021-10-04
Supplement: Data_Sheet_1.ZIP [file Table_S7.xlsx]

## Sheet: EGO.UP
Table S7_1. Go enrichment of upregulated genes ( p.adjust < 0.01) (high-risk group vs. low-risk group)
ID	Description	GeneRatio	BgRatio	pvalue	p.adjust	qvalue	Symbol	Count
GO:0000280	nuclear division	42/565	407/18670	4.04806e-12	1.08853e-08	8.9649e-09	HSF1/CHEK1/MAD2L1/TRIP13/BIRC5/PTTG1/KIF2C/UBE2C/CDC20/ZWINT/RAD54B/KATNB1/CDCA8/FBXO5/BUB1/RANBP1/RACGAP1/RRS1/RAD51/PRC1/TTK/MYBL2/KIF4A/CCNE1/TPX2/CCNE2/CCNB1/AURKB/CENPE/ESPL1/FANCA/ACTR3/CDC25B/NUSAP1/CDC6/FLNA/KIF11/NEK2/CAV2/SPAG5/KIF14/ASPM	42
GO:0140014	mitotic nuclear division	33/565	264/18670	5.12079e-12	1.08853e-08	8.9649e-09	CHEK1/MAD2L1/TRIP13/BIRC5/PTTG1/KIF2C/UBE2C/CDC20/ZWINT/KATNB1/CDCA8/FBXO5/BUB1/RANBP1/RACGAP1/RRS1/PRC1/TTK/MYBL2/KIF4A/TPX2/CCNB1/AURKB/CENPE/ESPL1/NUSAP1/CDC6/FLNA/KIF11/NEK2/CAV2/SPAG5/KIF14	33
GO:0048285	organelle fission	44/565	449/18670	7.07756e-12	1.08853e-08	8.9649e-09	HSF1/BNIP3/CHEK1/MAD2L1/TRIP13/BIRC5/PTTG1/KIF2C/UBE2C/CDC20/ZWINT/RAD54B/KATNB1/CDCA8/FBXO5/BUB1/RANBP1/RACGAP1/RRS1/RAD51/PRC1/TTK/MYBL2/KIF4A/CCNE1/TPX2/CCNE2/CCNB1/AURKB/CENPE/ESPL1/VPS35/FANCA/ACTR3/CDC25B/NUSAP1/CDC6/FLNA/KIF11/NEK2/CAV2/SPAG5/KIF14/ASPM	44
GO:0036293	response to decreased oxygen levels	39/565	370/18670	1.27237e-11	1.46768e-08	1.20875e-08	PGK1/PSMD7/HSF1/BNIP3/ADM/EIF4EBP1/PSMD14/NDRG1/PSMB5/IRAK1/CCNA2/PSMA7/CHCHD2/ANGPTL4/PSMC1/PSMB2/PLOD2/AHCY/ENO1/PLOD1/DNMT3B/CA9/CCNB1/PSMD2/ATF4/PSMA4/PSMD8/LDHA/E2F1/MYC/SLC2A1/CD24/DDIT4/TH/PSMD3/GATA6/HMOX1/CRYAB/CLDN3	39
GO:0001666	response to hypoxia	38/565	359/18670	2.07129e-11	1.71227e-08	1.41019e-08	PGK1/PSMD7/HSF1/BNIP3/ADM/EIF4EBP1/PSMD14/NDRG1/PSMB5/IRAK1/CCNA2/PSMA7/CHCHD2/ANGPTL4/PSMC1/PSMB2/PLOD2/AHCY/ENO1/PLOD1/DNMT3B/CA9/CCNB1/PSMD2/PSMA4/PSMD8/LDHA/E2F1/MYC/SLC2A1/CD24/DDIT4/TH/PSMD3/GATA6/HMOX1/CRYAB/CLDN3	38
GO:0070482	response to oxygen levels	40/565	394/18670	2.22662e-11	1.71227e-08	1.41019e-08	PGK1/PSMD7/HSF1/BNIP3/ADM/EIF4EBP1/PSMD14/NDRG1/PSMB5/IRAK1/CCNA2/PSMA7/CHCHD2/ANGPTL4/PSMC1/PSMB2/PLOD2/HDAC2/AHCY/ENO1/PLOD1/DNMT3B/CA9/CCNB1/PSMD2/ATF4/PSMA4/PSMD8/LDHA/E2F1/MYC/SLC2A1/CD24/DDIT4/TH/PSMD3/GATA6/HMOX1/CRYAB/CLDN3	40
GO:0000070	mitotic sister chromatid segregation	24/565	151/18670	2.74795e-11	1.81129e-08	1.49175e-08	MAD2L1/TRIP13/PTTG1/KIF2C/CDC20/ZWINT/KATNB1/CDCA8/FBXO5/BUB1/RACGAP1/RRS1/PRC1/TTK/KIF4A/CCNB1/AURKB/CENPE/ESPL1/NUSAP1/CDC6/NEK2/SPAG5/KIF14	24
GO:0031145	anaphase-promoting complex-dependent catabolic process	17/565	81/18670	2.51572e-10	1.45094e-07	1.19497e-07	PSMD7/PSMD14/MAD2L1/PSMB5/PSMA7/PTTG1/UBE2C/CDC20/PSMC1/PSMB2/FBXO5/CCNB1/PSMD2/AURKB/PSMA4/PSMD8/PSMD3	17
GO:0000819	sister chromatid segregation	25/565	189/18670	6.06783e-10	3.11077e-07	2.56197e-07	MAD2L1/TRIP13/PTTG1/KIF2C/CDC20/ZWINT/KATNB1/CDCA8/FBXO5/BUB1/RACGAP1/RRS1/PRC1/TTK/KIF4A/CCNB1/AURKB/CENPE/ESPL1/FEN1/NUSAP1/CDC6/NEK2/SPAG5/KIF14	25
GO:0051983	regulation of chromosome segregation	18/565	103/18670	1.74599e-09	7.74295e-07	6.37694e-07	MAD2L1/TRIP13/PTTG1/KIF2C/CDC20/FBXO5/BUB1/RACGAP1/TTK/CCNB1/AURKB/CENPE/ESPL1/FEN1/CDC6/ECT2/NEK2/SPAG5	18
GO:0098813	nuclear chromosome segregation	29/565	262/18670	1.84596e-09	7.74295e-07	6.37694e-07	MAD2L1/TRIP13/PTTG1/KIF2C/CDC20/ZWINT/KATNB1/CDCA8/FBXO5/BUB1/RACGAP1/RRS1/PRC1/TTK/KIF4A/CCNE1/CCNE2/CCNB1/AURKB/CENPE/ESPL1/FEN1/ACTR3/NUSAP1/CDC6/ECT2/NEK2/SPAG5/KIF14	29
GO:0019693	ribose phosphate metabolic process	37/565	424/18670	8.48439e-09	3.21564e-06	2.64834e-06	PGK1/APRT/ADK/CYC1/PDHA1/SUCLG1/GMPS/ELOVL1/TPI1/MVD/GART/PFKL/G6PD/ENO1/PFKP/PGM1/ALDOC/KYNU/GPI/DLD/NUP155/UPP1/PPAT/MFN1/GUK1/ALDOA/TDO2/LDHA/HPRT1/IMPDH1/NUP93/PTH/DDIT4/SLC25A1/DBI/SCD/PFKFB3	37
GO:0072521	purine-containing compound metabolic process	39/565	464/18670	9.4427e-09	3.21564e-06	2.64834e-06	PGK1/APRT/ADK/AMD1/CYC1/PDHA1/SUCLG1/GMPS/ELOVL1/TPI1/MVD/GART/PFKL/AHCY/ENO1/PFKP/PGM1/ALDOC/KYNU/GPI/DLD/NUP155/PPAT/MFN1/ADORA2B/GUK1/ALDOA/TDO2/LDHA/HPRT1/IMPDH1/NUP93/PTH/DDIT4/SLC25A1/DBI/SCD/NUDT1/PFKFB3	39
GO:0036294	cellular response to decreased oxygen levels	25/565	217/18670	1.08752e-08	3.21564e-06	2.64834e-06	PGK1/PSMD7/BNIP3/EIF4EBP1/PSMD14/NDRG1/PSMB5/IRAK1/CCNA2/PSMA7/CHCHD2/PSMC1/PSMB2/ENO1/CA9/CCNB1/PSMD2/ATF4/PSMA4/PSMD8/E2F1/MYC/PSMD3/GATA6/HMOX1	25
GO:0071453	cellular response to oxygen levels	26/565	234/18670	1.18304e-08	3.21564e-06	2.64834e-06	PGK1/PSMD7/BNIP3/EIF4EBP1/PSMD14/NDRG1/PSMB5/IRAK1/CCNA2/PSMA7/CHCHD2/PSMC1/PSMB2/ENO1/DNMT3B/CA9/CCNB1/PSMD2/ATF4/PSMA4/PSMD8/E2F1/MYC/PSMD3/GATA6/HMOX1	26
GO:0044106	cellular amine metabolic process	19/565	129/18670	1.18493e-08	3.21564e-06	2.64834e-06	PSMD7/AMD1/PSMD14/PSMB5/PSMA7/SRM/PSMC1/PSMB2/SMOX/PSMD2/KYNU/VPS35/PSMA4/PSMD8/TDO2/HPRT1/SMS/PSMD3/GPR37	19
GO:0051186	cofactor metabolic process	38/565	449/18670	1.22091e-08	3.21564e-06	2.64834e-06	PRDX4/AMD1/MTHFD2/PDHA1/HMBS/PTS/SUCLG1/GCLM/ELOVL1/MVD/GLRX2/GGH/GART/COQ3/COQ2/SLC19A1/ABCB6/G6PD/PSAT1/AHCY/PRDX1/SHMT2/SOD1/MCCC1/KYNU/DLD/TDO2/SLC2A1/GCHFR/SLC25A1/DBI/EGFR/IDH2/NNMT/SCD/SLC5A6/AKR1B10/HMOX1	38
GO:0046364	monosaccharide biosynthetic process	16/565	91/18670	1.27903e-08	3.21564e-06	2.64834e-06	PGK1/TALDO1/TKT/TPI1/MDH2/G6PD/DDB1/ENO1/PGM1/ALDOC/ATF4/GPI/MDH1/ALDOA/SLC25A1/ATF3	16
GO:0007059	chromosome segregation	31/565	321/18670	1.37066e-08	3.21564e-06	2.64834e-06	MAD2L1/TRIP13/BIRC5/PTTG1/KIF2C/CDC20/ZWINT/KATNB1/CDCA8/SRPK1/FBXO5/BUB1/RACGAP1/RRS1/PRC1/TTK/KIF4A/CCNE1/CCNE2/CCNB1/AURKB/CENPE/ESPL1/FEN1/ACTR3/NUSAP1/CDC6/ECT2/NEK2/SPAG5/KIF14	31
GO:0006163	purine nucleotide metabolic process	37/565	432/18670	1.39386e-08	3.21564e-06	2.64834e-06	PGK1/APRT/ADK/CYC1/PDHA1/SUCLG1/GMPS/ELOVL1/TPI1/MVD/GART/PFKL/ENO1/PFKP/PGM1/ALDOC/KYNU/GPI/DLD/NUP155/PPAT/MFN1/ADORA2B/GUK1/ALDOA/TDO2/LDHA/HPRT1/IMPDH1/NUP93/PTH/DDIT4/SLC25A1/DBI/SCD/NUDT1/PFKFB3	37
GO:0009259	ribonucleotide metabolic process	36/565	414/18670	1.48516e-08	3.2182e-06	2.65044e-06	PGK1/APRT/ADK/CYC1/PDHA1/SUCLG1/GMPS/ELOVL1/TPI1/MVD/GART/PFKL/ENO1/PFKP/PGM1/ALDOC/KYNU/GPI/DLD/NUP155/UPP1/PPAT/MFN1/GUK1/ALDOA/TDO2/LDHA/HPRT1/IMPDH1/NUP93/PTH/DDIT4/SLC25A1/DBI/SCD/PFKFB3	36
GO:1902850	microtubule cytoskeleton organization involved in mitosis	19/565	131/18670	1.53447e-08	3.2182e-06	2.65044e-06	CENPA/MAD2L1/BIRC5/CDC20/RACGAP1/PRC1/TTK/MYBL2/KIF4A/TPX2/CCNB1/AURKB/CENPE/ESPL1/GNAI1/NUSAP1/FLNA/KIF11/NEK2	19
GO:0071456	cellular response to hypoxia	24/565	207/18670	1.88995e-08	3.6468e-06	3.00343e-06	PGK1/PSMD7/BNIP3/EIF4EBP1/PSMD14/NDRG1/PSMB5/IRAK1/CCNA2/PSMA7/CHCHD2/PSMC1/PSMB2/ENO1/CA9/CCNB1/PSMD2/PSMA4/PSMD8/E2F1/MYC/PSMD3/GATA6/HMOX1	24
GO:0009150	purine ribonucleotide metabolic process	35/565	399/18670	1.8969e-08	3.6468e-06	3.00343e-06	PGK1/APRT/ADK/CYC1/PDHA1/SUCLG1/GMPS/ELOVL1/TPI1/MVD/GART/PFKL/ENO1/PFKP/PGM1/ALDOC/KYNU/GPI/DLD/NUP155/PPAT/MFN1/GUK1/ALDOA/TDO2/LDHA/HPRT1/IMPDH1/NUP93/PTH/DDIT4/SLC25A1/DBI/SCD/PFKFB3	35
GO:0006520	cellular amino acid metabolic process	32/565	348/18670	2.58177e-08	4.76491e-06	3.92428e-06	PSMD7/PRDX4/PSMD14/PTS/PSMB5/GMPS/GCLM/PSMA7/ASNS/GART/PSMC1/PSMB2/PSAT1/PLOD3/PLOD2/AHCY/PLOD1/SHMT2/PSMD2/MCCC1/ATF4/KYNU/PHGDH/DLD/PPAT/PSMA4/PSMD8/BCAT1/TDO2/SMS/TH/PSMD3	32
GO:1901990	regulation of mitotic cell cycle phase transition	37/565	444/18670	2.8602e-08	5.07575e-06	4.18029e-06	PSMD7/PSMD14/MAD2L1/TRIP13/PSMB5/PSMA7/UBE2C/CDC20/PSMC1/PSMB2/DDB1/FBXO5/BUB1/TTK/CCNE1/TPX2/CCNB1/PSMD2/AURKB/CDKN2A/CENPE/HMMR/ESPL1/PSMA4/PSMD8/BAX/E2F1/CDC25A/EZH2/CDC25B/CDC6/PSMD3/EGFR/NEK2/ADAMTS1/KIF14/SFN	37
GO:0043312	neutrophil degranulation	39/565	485/18670	3.15485e-08	5.39128e-06	4.44016e-06	PSMD7/PRDX4/KCMF1/APRT/PSMD14/S100A9/S100A8/HEBP2/GGH/PFKL/CCT2/HPSE/CSTB/PLAUR/ANXA2/DDOST/PGM1/ALDOC/PSMD2/PDAP1/CCT8/GPI/LAMP2/ALDOA/NRAS/IMPDH1/CXCL1/SDCBP/PSMD3/CALML5/HSPA8/PKP1/SLPI/S100A11/DEGS1/ANXA3/LCN2/PTX3/S100P	39
GO:0009308	amine metabolic process	19/565	138/18670	3.64582e-08	5.92384e-06	4.87876e-06	PSMD7/AMD1/PSMD14/PSMB5/PSMA7/SRM/PSMC1/PSMB2/SMOX/PSMD2/KYNU/VPS35/PSMA4/PSMD8/TDO2/HPRT1/SMS/PSMD3/GPR37	19
GO:0002283	neutrophil activation involved in immune response	39/565	488/18670	3.72326e-08	5.92384e-06	4.87876e-06	PSMD7/PRDX4/KCMF1/APRT/PSMD14/S100A9/S100A8/HEBP2/GGH/PFKL/CCT2/HPSE/CSTB/PLAUR/ANXA2/DDOST/PGM1/ALDOC/PSMD2/PDAP1/CCT8/GPI/LAMP2/ALDOA/NRAS/IMPDH1/CXCL1/SDCBP/PSMD3/CALML5/HSPA8/PKP1/SLPI/S100A11/DEGS1/ANXA3/LCN2/PTX3/S100P	39
GO:0022900	electron transport chain	22/565	186/18670	5.15703e-08	7.86617e-06	6.47843e-06	UQCRB/UQCRH/CYC1/P4HA2/COX5A/SRD5A1/GLRX2/COX4I1/COX7B/TSTA3/NDUFAB1/ETFB/SDHA/CCNB1/PHGDH/DLD/COX7A2/UQCRFS1/HSD17B6/ME2/DEGS1/ASPH	22
GO:0046034	ATP metabolic process	29/565	304/18670	5.28503e-08	7.86617e-06	6.47843e-06	PGK1/UQCRB/UQCRH/CYC1/COX5A/TPI1/PFKL/COX4I1/COX7B/ENO1/SHMT2/NDUFAB1/PFKP/SDHA/PGM1/CCNB1/ALDOC/GPI/DLD/NUP155/COX7A2/GUK1/ALDOA/LDHA/UQCRFS1/NUP93/DDIT4/HSPA8/PFKFB3	29
GO:0009060	aerobic respiration	15/565	88/18670	5.61996e-08	8.10327e-06	6.6737e-06	BNIP3/UQCRB/UQCRH/PDHA1/SUCLG1/COX5A/MDH2/COX4I1/COX7B/SHMT2/SDHA/MDH1/DLD/ME2/IDH2	15
GO:0042119	neutrophil activation	39/565	498/18670	6.39389e-08	8.93982e-06	7.36266e-06	PSMD7/PRDX4/KCMF1/APRT/PSMD14/S100A9/S100A8/HEBP2/GGH/PFKL/CCT2/HPSE/CSTB/PLAUR/ANXA2/DDOST/PGM1/ALDOC/PSMD2/PDAP1/CCT8/GPI/LAMP2/ALDOA/NRAS/IMPDH1/CXCL1/SDCBP/PSMD3/CALML5/HSPA8/PKP1/SLPI/S100A11/DEGS1/ANXA3/LCN2/PTX3/S100P	39
GO:0002446	neutrophil mediated immunity	39/565	499/18670	6.74274e-08	9.1503e-06	7.536e-06	PSMD7/PRDX4/KCMF1/APRT/PSMD14/S100A9/S100A8/HEBP2/GGH/PFKL/CCT2/HPSE/CSTB/PLAUR/ANXA2/DDOST/PGM1/ALDOC/PSMD2/PDAP1/CCT8/GPI/LAMP2/ALDOA/NRAS/IMPDH1/CXCL1/SDCBP/PSMD3/CALML5/HSPA8/PKP1/SLPI/S100A11/DEGS1/ANXA3/LCN2/PTX3/S100P	39
GO:1901987	regulation of cell cycle phase transition	38/565	480/18670	7.15357e-08	9.43044e-06	7.76673e-06	PSMD7/PSMD14/CHEK1/MAD2L1/TRIP13/PSMB5/PSMA7/UBE2C/CDC20/PSMC1/PSMB2/DDB1/FBXO5/BUB1/TTK/CCNE1/TPX2/CCNB1/PSMD2/AURKB/CDKN2A/CENPE/HMMR/ESPL1/PSMA4/PSMD8/BAX/E2F1/CDC25A/EZH2/CDC25B/CDC6/PSMD3/EGFR/NEK2/ADAMTS1/KIF14/SFN	38
GO:0046677	response to antibiotic	30/565	327/18670	7.44494e-08	9.54194e-06	7.85855e-06	HSF1/BNIP3/EIF4EBP1/PSMD14/S100A8/SRD5A1/ADAM9/GLRX2/GGH/G6PD/TXN/HDAC2/PDCD10/SOD1/RSRC1/GNAI1/LDHA/EZH2/PTH/SDC1/TH/ECT2/GPR37/CCL7/NET1/HMOX1/CRYAB/RGS2/LCN2/CLDN3	30
GO:0016051	carbohydrate biosynthetic process	23/565	208/18670	9.03141e-08	1.12624e-05	9.2755e-06	PGK1/TALDO1/IMPA2/TKT/TPI1/MDH2/G6PD/DDB1/ENO1/UGP2/FUT3/PGM1/ALDOC/ATF4/GPI/MDH1/ALDOA/SLC2A1/PTH/P2RY6/SLC25A1/B4GALT5/ATF3	23
GO:0010965	regulation of mitotic sister chromatid separation	12/565	57/18670	1.07227e-07	1.30197e-05	1.07227e-05	MAD2L1/TRIP13/PTTG1/CDC20/FBXO5/BUB1/TTK/CCNB1/AURKB/CENPE/ESPL1/CDC6	12
GO:0071347	cellular response to interleukin-1	21/565	179/18670	1.19324e-07	1.41169e-05	1.16264e-05	PSMD7/PSMD14/PSMB5/IRAK1/PSMA7/PSMC1/PSMB2/RIPK2/PSMD2/CEBPB/PSMA4/PSMD8/CCL8/CCL20/PSMD3/FGG/CCL7/CCL13/CCL18/FGB/LCN2	21
GO:0043618	regulation of transcription from RNA polymerase II promoter in response to stress	17/565	121/18670	1.41088e-07	1.54212e-05	1.27006e-05	PSMD7/HSF1/PSMD14/CHEK1/PSMB5/PSMA7/PSMC1/PSMB2/CA9/PSMD2/ATF4/CEBPB/PSMA4/PSMD8/PSMD3/HMOX1/ATF3	17
GO:0006090	pyruvate metabolic process	19/565	150/18670	1.41456e-07	1.54212e-05	1.27006e-05	PGK1/PDHA1/TPI1/PFKL/SLC16A3/ENO1/PFKP/LDHB/PGM1/ALDOC/GPI/DLD/NUP155/ALDOA/LDHA/NUP93/ME2/DDIT4/PFKFB3	19
GO:0000086	G2/M transition of mitotic cell cycle	25/565	247/18670	1.42271e-07	1.54212e-05	1.27006e-05	PSMD7/PSMD14/PSMB5/CCNB2/CCNA2/PSMA7/MELK/PSMC1/PSMB2/FBXO5/TPX2/CCNB1/PSMD2/AURKB/HMMR/PSMA4/PSMD8/CDC25A/CDC25B/CDC6/PSMD3/NEK2/TPD52L1/KIF14/PHLDA1	25
GO:0035690	cellular response to drug	35/565	433/18670	1.43717e-07	1.54212e-05	1.27006e-05	HSF1/BNIP3/EIF4EBP1/CCNA2/GCLM/SRD5A1/TXN/HDAC2/RIPK2/DNMT3B/RAD51/SLC31A1/PDCD10/SOD1/ATF4/PPAT/VPS35/GNAI1/MYC/EZH2/DDIT4/TH/FLNA/ECT2/EGFR/GPR37/CCL7/PRNP/CAV2/TFRC/CDH1/NET1/HMOX1/KCNH2/LCN2	35
GO:0045930	negative regulation of mitotic cell cycle	30/565	338/18670	1.54132e-07	1.61628e-05	1.33114e-05	PSMD7/PSMD14/CHEK1/MAD2L1/TRIP13/PSMB5/PSMA7/BTG3/PTTG1/CDC20/ZWINT/PSMC1/PSMB2/FBXO5/BUB1/TTK/CCNB1/PSMD2/AURKB/HRAS/CDKN2A/PSMA4/PSMD8/BAX/E2F1/EZH2/CDC6/PSMD3/EGFR/SFN	30
GO:0044839	cell cycle G2/M phase transition	26/565	266/18670	1.60615e-07	1.64684e-05	1.35631e-05	PSMD7/PSMD14/CHEK1/PSMB5/CCNB2/CCNA2/PSMA7/MELK/PSMC1/PSMB2/FBXO5/TPX2/CCNB1/PSMD2/AURKB/HMMR/PSMA4/PSMD8/CDC25A/CDC25B/CDC6/PSMD3/NEK2/TPD52L1/KIF14/PHLDA1	26
GO:0051306	mitotic sister chromatid separation	12/565	60/18670	1.95309e-07	1.95903e-05	1.61342e-05	MAD2L1/TRIP13/PTTG1/CDC20/FBXO5/BUB1/TTK/CCNB1/AURKB/CENPE/ESPL1/CDC6	12
GO:0010948	negative regulation of cell cycle process	31/565	361/18670	2.0003e-07	1.9637e-05	1.61726e-05	PSMD7/PSMD14/CHEK1/MAD2L1/TRIP13/RRM2/PSMB5/PSMA7/PTTG1/CDC20/PSMC1/PSMB2/FBXO5/BUB1/RAD51/TTK/CCNB1/PSMD2/AURKB/CDKN2A/FZD9/ESPL1/PSMA4/PSMD8/BAX/E2F1/EZH2/CDC6/PSMD3/NEK2/SFN	31
GO:0006734	NADH metabolic process	10/565	40/18670	2.22534e-07	2.13911e-05	1.76173e-05	PGK1/TPI1/MDH2/PFKL/ENO1/PFKP/ALDOC/GPI/MDH1/ALDOA	10
GO:0006732	coenzyme metabolic process	25/565	255/18670	2.62342e-07	2.4703e-05	2.03449e-05	AMD1/MTHFD2/PDHA1/PTS/SUCLG1/ELOVL1/MVD/GGH/GART/COQ3/COQ2/SLC19A1/AHCY/SHMT2/MCCC1/KYNU/DLD/TDO2/SLC2A1/SLC25A1/DBI/IDH2/NNMT/SCD/SLC5A6	25
GO:0019674	NAD metabolic process	11/565	51/18670	2.80968e-07	2.50634e-05	2.06417e-05	PGK1/TPI1/PFKL/ENO1/PFKP/LDHB/ALDOC/GPI/MDH1/ALDOA/LDHA	11
GO:0030071	regulation of mitotic metaphase/anaphase transition	11/565	51/18670	2.80968e-07	2.50634e-05	2.06417e-05	MAD2L1/TRIP13/CDC20/FBXO5/BUB1/TTK/CCNB1/AURKB/CENPE/ESPL1/CDC6	11
GO:1905818	regulation of chromosome separation	12/565	62/18670	2.85325e-07	2.50634e-05	2.06417e-05	MAD2L1/TRIP13/PTTG1/CDC20/FBXO5/BUB1/TTK/CCNB1/AURKB/CENPE/ESPL1/CDC6	12
GO:0043620	regulation of DNA-templated transcription in response to stress	17/565	127/18670	2.87898e-07	2.50634e-05	2.06417e-05	PSMD7/HSF1/PSMD14/CHEK1/PSMB5/PSMA7/PSMC1/PSMB2/CA9/PSMD2/ATF4/CEBPB/PSMA4/PSMD8/PSMD3/HMOX1/ATF3	17
GO:0070125	mitochondrial translational elongation	14/565	88/18670	3.7772e-07	3.22741e-05	2.65803e-05	MRPL13/MRPL15/MRPL12/MRPS18A/MRPL42/MRPL18/MRPL39/MRPL33/MRPS12/MRPS28/MRPL17/MRPL48/MRPL35/MRPS33	14
GO:1902099	regulation of metaphase/anaphase transition of cell cycle	11/565	53/18670	4.25692e-07	3.57117e-05	2.94114e-05	MAD2L1/TRIP13/CDC20/FBXO5/BUB1/TTK/CCNB1/AURKB/CENPE/ESPL1/CDC6	11
GO:0070126	mitochondrial translational termination	14/565	89/18670	4.35957e-07	3.59198e-05	2.95828e-05	MRPL13/MRPL15/MRPL12/MRPS18A/MRPL42/MRPL18/MRPL39/MRPL33/MRPS12/MRPS28/MRPL17/MRPL48/MRPL35/MRPS33	14
GO:0007091	metaphase/anaphase transition of mitotic cell cycle	11/565	54/18670	5.2014e-07	4.19123e-05	3.45181e-05	MAD2L1/TRIP13/CDC20/FBXO5/BUB1/TTK/CCNB1/AURKB/CENPE/ESPL1/CDC6	11
GO:2001235	positive regulation of apoptotic signaling pathway	20/565	179/18670	5.26856e-07	4.19123e-05	3.45181e-05	BNIP3/PDCD5/S100A9/S100A8/BCAP31/LTBR/TNFRSF12A/PLAUR/YWHAQ/STK3/SOD1/MLLT11/BAX/E2F1/RPS7/HRK/YWHAZ/TPD52L1/SFN/ATF3	20
GO:0006415	translational termination	15/565	104/18670	5.41137e-07	4.23187e-05	3.48529e-05	MRPL13/MRPL15/MRPL12/MRPS18A/MRPL42/MRPL18/MRPL39/MRPL33/MRPS12/MRPS28/MRPL17/MRPL48/MRPL35/MRPS33/EIF5A	15
GO:1901991	negative regulation of mitotic cell cycle phase transition	24/565	248/18670	5.76383e-07	4.34725e-05	3.58031e-05	PSMD7/PSMD14/MAD2L1/TRIP13/PSMB5/PSMA7/CDC20/PSMC1/PSMB2/FBXO5/BUB1/TTK/CCNB1/PSMD2/AURKB/CDKN2A/PSMA4/PSMD8/BAX/E2F1/EZH2/CDC6/PSMD3/SFN	24
GO:0007088	regulation of mitotic nuclear division	19/565	164/18670	5.78384e-07	4.34725e-05	3.58031e-05	CHEK1/MAD2L1/TRIP13/PTTG1/UBE2C/CDC20/FBXO5/BUB1/RANBP1/TTK/CCNB1/AURKB/CENPE/ESPL1/NUSAP1/CDC6/KIF11/NEK2/CAV2	19
GO:0033046	negative regulation of sister chromatid segregation	10/565	44/18670	5.84155e-07	4.34725e-05	3.58031e-05	MAD2L1/TRIP13/PTTG1/CDC20/FBXO5/BUB1/TTK/CCNB1/AURKB/ESPL1	10
GO:1901988	negative regulation of cell cycle phase transition	25/565	267/18670	6.24639e-07	4.57473e-05	3.76766e-05	PSMD7/PSMD14/CHEK1/MAD2L1/TRIP13/PSMB5/PSMA7/CDC20/PSMC1/PSMB2/FBXO5/BUB1/TTK/CCNB1/PSMD2/AURKB/CDKN2A/PSMA4/PSMD8/BAX/E2F1/EZH2/CDC6/PSMD3/SFN	25
GO:0015980	energy derivation by oxidation of organic compounds	26/565	286/18670	6.58819e-07	4.74967e-05	3.91174e-05	BNIP3/UQCRB/UQCRH/CYC1/PDHA1/SUCLG1/COX5A/PHLDA2/MDH2/COX4I1/COX7B/SHMT2/UGP2/NDUFAB1/ETFB/SDHA/PGM1/CCNB1/MDH1/DLD/UQCRFS1/MYC/ME2/PTH/IDH2/PPP1R1A	26
GO:0007052	mitotic spindle organization	15/565	106/18670	6.9558e-07	4.93755e-05	4.06647e-05	BIRC5/CDC20/RACGAP1/PRC1/TTK/MYBL2/KIF4A/TPX2/CCNB1/AURKB/CENPE/GNAI1/FLNA/KIF11/NEK2	15
GO:0051985	negative regulation of chromosome segregation	10/565	45/18670	7.30887e-07	5.10956e-05	4.20814e-05	MAD2L1/TRIP13/PTTG1/CDC20/FBXO5/BUB1/TTK/CCNB1/AURKB/ESPL1	10
GO:0033045	regulation of sister chromatid segregation	13/565	80/18670	7.65525e-07	5.19732e-05	4.28041e-05	MAD2L1/TRIP13/PTTG1/CDC20/FBXO5/BUB1/TTK/CCNB1/AURKB/CENPE/ESPL1/FEN1/CDC6	13
GO:0044784	metaphase/anaphase transition of cell cycle	11/565	56/18670	7.65968e-07	5.19732e-05	4.28041e-05	MAD2L1/TRIP13/CDC20/FBXO5/BUB1/TTK/CCNB1/AURKB/CENPE/ESPL1/CDC6	11
GO:0033047	regulation of mitotic sister chromatid segregation	12/565	68/18670	8.15348e-07	5.34442e-05	4.40156e-05	MAD2L1/TRIP13/PTTG1/CDC20/FBXO5/BUB1/TTK/CCNB1/AURKB/CENPE/ESPL1/CDC6	12
GO:0009127	purine nucleoside monophosphate biosynthetic process	7/565	19/18670	8.22397e-07	5.34442e-05	4.40156e-05	APRT/ADK/GMPS/GART/PPAT/HPRT1/IMPDH1	7
GO:0009168	purine ribonucleoside monophosphate biosynthetic process	7/565	19/18670	8.22397e-07	5.34442e-05	4.40156e-05	APRT/ADK/GMPS/GART/PPAT/HPRT1/IMPDH1	7
GO:0033238	regulation of cellular amine metabolic process	13/565	81/18670	8.87013e-07	5.50029e-05	4.52993e-05	PSMD7/PSMD14/PSMB5/PSMA7/PSMC1/PSMB2/PSMD2/VPS35/PSMA4/PSMD8/HPRT1/PSMD3/GPR37	13
GO:0006735	NADH regeneration	8/565	27/18670	8.94065e-07	5.50029e-05	4.52993e-05	PGK1/TPI1/PFKL/ENO1/PFKP/ALDOC/GPI/ALDOA	8
GO:0061621	canonical glycolysis	8/565	27/18670	8.94065e-07	5.50029e-05	4.52993e-05	PGK1/TPI1/PFKL/ENO1/PFKP/ALDOC/GPI/ALDOA	8
GO:0061718	glucose catabolic process to pyruvate	8/565	27/18670	8.94065e-07	5.50029e-05	4.52993e-05	PGK1/TPI1/PFKL/ENO1/PFKP/ALDOC/GPI/ALDOA	8
GO:0007051	spindle organization	19/565	170/18670	1.0067e-06	6.11175e-05	5.03352e-05	BIRC5/CDC20/FBXO5/RACGAP1/PRC1/TTK/MYBL2/KIF4A/TPX2/CCNB1/AURKB/CENPE/ESPL1/GNAI1/FLNA/KIF11/NEK2/SPAG5/ASPM	19
GO:0006094	gluconeogenesis	13/565	82/18670	1.02539e-06	6.14438e-05	5.06039e-05	PGK1/TPI1/MDH2/DDB1/ENO1/PGM1/ALDOC/ATF4/GPI/MDH1/ALDOA/SLC25A1/ATF3	13
GO:0006575	cellular modified amino acid metabolic process	20/565	188/18670	1.1529e-06	6.81983e-05	5.61668e-05	PRDX4/MTHFD2/GCLM/GLRX2/GGH/PTDSS1/GART/SLC19A1/G6PD/PLOD3/PLOD2/AHCY/PLOD1/SHMT2/SOD1/SLC6A8/SLC5A6/PLSCR1/CKB/BBOX1	20
GO:0061615	glycolytic process through fructose-6-phosphate	8/565	28/18670	1.21868e-06	7.02872e-05	5.78872e-05	PGK1/TPI1/PFKL/ENO1/PFKP/ALDOC/GPI/ALDOA	8
GO:0061620	glycolytic process through glucose-6-phosphate	8/565	28/18670	1.21868e-06	7.02872e-05	5.78872e-05	PGK1/TPI1/PFKL/ENO1/PFKP/ALDOC/GPI/ALDOA	8
GO:0070555	response to interleukin-1	21/565	207/18670	1.36286e-06	7.76327e-05	6.39368e-05	PSMD7/PSMD14/PSMB5/IRAK1/PSMA7/PSMC1/PSMB2/RIPK2/PSMD2/CEBPB/PSMA4/PSMD8/CCL8/CCL20/PSMD3/FGG/CCL7/CCL13/CCL18/FGB/LCN2	21
GO:0019319	hexose biosynthetic process	13/565	85/18670	1.56307e-06	8.79511e-05	7.24348e-05	PGK1/TPI1/MDH2/DDB1/ENO1/PGM1/ALDOC/ATF4/GPI/MDH1/ALDOA/SLC25A1/ATF3	13
GO:0043648	dicarboxylic acid metabolic process	14/565	99/18670	1.64473e-06	9.14313e-05	7.5301e-05	MTHFD2/SUCLG1/PHYH/GCLM/MDH2/SLC19A1/SHMT2/SDHA/KYNU/MDH1/DLD/ME2/TH/IDH2	14
GO:1901293	nucleoside phosphate biosynthetic process	25/565	282/18670	1.70987e-06	9.3921e-05	7.73515e-05	APRT/ADK/CYC1/PDHA1/RRM2/SUCLG1/GMPS/ELOVL1/TBPL1/GART/TK1/ENO1/KYNU/DLD/UPP1/PPAT/ADORA2B/GUK1/ALDOA/HPRT1/IMPDH1/SLC25A1/IDH2/NNMT/SCD	25
GO:0009163	nucleoside biosynthetic process	9/565	39/18670	1.88122e-06	0.000100151	8.24821e-05	APRT/ADK/AMD1/GMPS/TK1/UPP1/GUK1/HPRT1/IMPDH1	9
GO:2000816	negative regulation of mitotic sister chromatid separation	9/565	39/18670	1.88122e-06	0.000100151	8.24821e-05	MAD2L1/TRIP13/PTTG1/CDC20/FBXO5/BUB1/TTK/CCNB1/AURKB	9
GO:0045333	cellular respiration	20/565	194/18670	1.88841e-06	0.000100151	8.24821e-05	BNIP3/UQCRB/UQCRH/CYC1/PDHA1/SUCLG1/COX5A/MDH2/COX4I1/COX7B/SHMT2/NDUFAB1/ETFB/SDHA/CCNB1/MDH1/DLD/UQCRFS1/ME2/IDH2	20
GO:0042542	response to hydrogen peroxide	17/565	146/18670	2.10794e-06	0.000110523	9.10246e-05	HSF1/BNIP3/ADAM9/GLRX2/TXN/HDAC2/PDCD10/SOD1/LDHA/EZH2/SDC1/ECT2/GPR37/NET1/HMOX1/CRYAB/LCN2	17
GO:1902749	regulation of cell cycle G2/M phase transition	21/565	213/18670	2.16322e-06	0.000112147	9.23623e-05	PSMD7/PSMD14/CHEK1/PSMB5/PSMA7/PSMC1/PSMB2/FBXO5/TPX2/CCNB1/PSMD2/AURKB/HMMR/PSMA4/PSMD8/CDC25A/CDC25B/CDC6/PSMD3/NEK2/KIF14	21
GO:0010389	regulation of G2/M transition of mitotic cell cycle	20/565	196/18670	2.21543e-06	0.000113578	9.35403e-05	PSMD7/PSMD14/PSMB5/PSMA7/PSMC1/PSMB2/FBXO5/TPX2/CCNB1/PSMD2/AURKB/HMMR/PSMA4/PSMD8/CDC25A/CDC25B/CDC6/PSMD3/NEK2/KIF14	20
GO:1905819	negative regulation of chromosome separation	9/565	40/18670	2.36277e-06	0.0001198	9.86653e-05	MAD2L1/TRIP13/PTTG1/CDC20/FBXO5/BUB1/TTK/CCNB1/AURKB	9
GO:0006414	translational elongation	16/565	133/18670	2.72247e-06	0.000136538	0.00011245	MRPL13/MRPL15/DPH2/MRPL12/MRPS18A/MRPL42/MRPL18/MRPL39/MRPL33/MRPS12/MRPS28/MRPL17/MRPL48/MRPL35/MRPS33/EIF5A	16
GO:0045787	positive regulation of cell cycle	30/565	389/18670	2.95438e-06	0.000146029	0.000120267	HSF1/EIF4EBP1/CHEK1/MAD2L1/UBE2C/ASNS/FBXO5/RANBP1/RACGAP1/CCNE1/CCNB1/AURKB/FZD9/ESPL1/BAX/E2F1/CDC25A/EZH2/FEN1/LGMN/CDC25B/NUSAP1/CDC6/ECT2/EGFR/SPAG5/ADAMTS1/GATA6/KIF14/SFN	30
GO:0045839	negative regulation of mitotic nuclear division	10/565	52/18670	2.99609e-06	0.000146029	0.000120267	CHEK1/MAD2L1/TRIP13/PTTG1/CDC20/FBXO5/BUB1/TTK/CCNB1/AURKB	10
GO:0046939	nucleotide phosphorylation	16/565	134/18670	3.00667e-06	0.000146029	0.000120267	PGK1/SUCLG1/TPI1/PFKL/ENO1/PFKP/PGM1/ALDOC/GPI/NUP155/GUK1/ALDOA/LDHA/NUP93/DDIT4/PFKFB3	16
GO:0006260	DNA replication	24/565	273/18670	3.18368e-06	0.000153015	0.000126021	CHEK1/RRM2/CCNA2/RFC2/CDC34/MCM10/RFC4/EXO1/FBXO5/RAD51/POLD2/CCNE1/CCNE2/RNASEH2A/RECQL4/HRAS/GMNN/CHAF1B/FEN1/CDC6/EGFR/HMGA1/MCM2/S100A11	24
GO:0042451	purine nucleoside biosynthetic process	7/565	23/18670	3.60076e-06	0.000167817	0.000138211	APRT/ADK/AMD1/GMPS/GUK1/HPRT1/IMPDH1	7
GO:0042455	ribonucleoside biosynthetic process	7/565	23/18670	3.60076e-06	0.000167817	0.000138211	APRT/ADK/AMD1/GMPS/GUK1/HPRT1/IMPDH1	7
GO:0046129	purine ribonucleoside biosynthetic process	7/565	23/18670	3.60076e-06	0.000167817	0.000138211	APRT/ADK/AMD1/GMPS/GUK1/HPRT1/IMPDH1	7
GO:0033048	negative regulation of mitotic sister chromatid segregation	9/565	42/18670	3.65065e-06	0.000168441	0.000138725	MAD2L1/TRIP13/PTTG1/CDC20/FBXO5/BUB1/TTK/CCNB1/AURKB	9
GO:0008608	attachment of spindle microtubules to kinetochore	8/565	32/18670	3.70632e-06	0.000169316	0.000139446	KIF2C/RACGAP1/CCNB1/AURKB/CENPE/ECT2/NEK2/SPAG5	8
GO:1901605	alpha-amino acid metabolic process	20/565	204/18670	4.10322e-06	0.000185611	0.000152865	PRDX4/GMPS/GCLM/ASNS/GART/PSAT1/PLOD3/PLOD2/AHCY/PLOD1/SHMT2/MCCC1/KYNU/PHGDH/DLD/PPAT/BCAT1/TDO2/SMS/TH	20
GO:1901659	glycosyl compound biosynthetic process	9/565	43/18670	4.49421e-06	0.000201323	0.000165806	APRT/ADK/AMD1/GMPS/TK1/UPP1/GUK1/HPRT1/IMPDH1	9
GO:0051783	regulation of nuclear division	19/565	188/18670	4.563e-06	0.000201798	0.000166197	CHEK1/MAD2L1/TRIP13/PTTG1/UBE2C/CDC20/FBXO5/BUB1/RANBP1/TTK/CCNB1/AURKB/CENPE/ESPL1/NUSAP1/CDC6/KIF11/NEK2/CAV2	19
GO:0044843	cell cycle G1/S phase transition	25/565	298/18670	4.59784e-06	0.000201798	0.000166197	EIF4EBP1/RRM2/CCNA2/CDKN3/CDC34/MCM10/FBXO5/CCNE1/CCNE2/CCNB1/CDKN2A/PPAT/BAX/BCAT1/E2F1/GMNN/CDC25A/MYC/EZH2/CDC6/EGFR/MCM2/ADAMTS1/KIF14/SFN	25
GO:0000082	G1/S transition of mitotic cell cycle	24/565	279/18670	4.63602e-06	0.000201798	0.000166197	EIF4EBP1/RRM2/CDKN3/CDC34/MCM10/FBXO5/CCNE1/CCNE2/CCNB1/CDKN2A/PPAT/BAX/BCAT1/E2F1/GMNN/CDC25A/MYC/EZH2/CDC6/EGFR/MCM2/ADAMTS1/KIF14/SFN	24
GO:0009156	ribonucleoside monophosphate biosynthetic process	8/565	33/18670	4.76351e-06	0.00020541	0.000169171	APRT/ADK/GMPS/GART/UPP1/PPAT/HPRT1/IMPDH1	8
GO:0008637	apoptotic mitochondrial changes	15/565	124/18670	5.18869e-06	0.000221672	0.000182565	BNIP3/PDCD5/HSPD1/GCLM/PLAUR/YWHAQ/SOD2/FZD9/VPS35/MLLT11/BAX/E2F1/HRK/YWHAZ/SFN	15
GO:0009124	nucleoside monophosphate biosynthetic process	9/565	44/18670	5.49965e-06	0.000232802	0.000191731	APRT/ADK/GMPS/GART/TK1/UPP1/PPAT/HPRT1/IMPDH1	9
GO:0010038	response to metal ion	28/565	362/18670	5.96707e-06	0.000249866	0.000205785	HSF1/BNIP3/NDRG1/S100A8/ADAM9/GGH/G6PD/AQP9/TRPV6/SOD1/CCNB1/ATF4/MT1G/HOMER1/LGMN/PTH/MT1H/SDC1/TH/CLIC4/ECT2/EGFR/FGG/PRNP/CDH1/NUDT1/FGB/HMOX1	28
GO:0090307	mitotic spindle assembly	10/565	56/18670	6.04916e-06	0.000249866	0.000205785	BIRC5/CDC20/RACGAP1/MYBL2/KIF4A/TPX2/AURKB/FLNA/KIF11/NEK2	10
GO:0006099	tricarboxylic acid cycle	8/565	34/18670	6.06524e-06	0.000249866	0.000205785	PDHA1/SUCLG1/MDH2/SDHA/MDH1/DLD/ME2/IDH2	8
GO:0032984	protein-containing complex disassembly	26/565	323/18670	6.29678e-06	0.000257109	0.00021175	MRPL13/BNIP3/MRPL15/MRPL12/KIF2C/MRPS18A/MRPL42/KATNB1/MRPL18/MRPL39/MRPL33/MRPS12/SMARCD2/MRPS28/MRPL17/MRPL48/MRPL35/LAMP2/MYC/MID1/MRPS33/DDIT4/EIF5A/HMGA1/HSPA8/ASPH	26
GO:0019320	hexose catabolic process	10/565	57/18670	7.13972e-06	0.000288971	0.000237991	PGK1/TPI1/GALK2/PFKL/ENO1/PFKP/PGM1/ALDOC/GPI/ALDOA	10
GO:0005996	monosaccharide metabolic process	24/565	287/18670	7.51028e-06	0.000301326	0.000248166	PGK1/PDHA1/TALDO1/TKT/PHLDA2/TPI1/MDH2/GALK2/PFKL/G6PD/DDB1/ENO1/PFKP/PGM1/ALDOC/ATF4/GPI/MDH1/ALDOA/SLC2A1/PTH/SLC25A1/ATF3/PFKFB3	24
GO:0006096	glycolytic process	14/565	113/18670	8.05416e-06	0.000320361	0.000263843	PGK1/TPI1/PFKL/ENO1/PFKP/PGM1/ALDOC/GPI/NUP155/ALDOA/LDHA/NUP93/DDIT4/PFKFB3	14
GO:0000302	response to reactive oxygen species	21/565	232/18670	8.31797e-06	0.000328027	0.000270156	HSF1/BNIP3/CCNA2/ADAM9/GLRX2/TXN/HDAC2/PRDX1/PDCD10/SOD1/SOD2/LDHA/EZH2/SDC1/ECT2/EGFR/GPR37/NET1/HMOX1/CRYAB/LCN2	21
GO:0006757	ATP generation from ADP	14/565	114/18670	8.93115e-06	0.000349223	0.000287613	PGK1/TPI1/PFKL/ENO1/PFKP/PGM1/ALDOC/GPI/NUP155/ALDOA/LDHA/NUP93/DDIT4/PFKFB3	14
GO:0045931	positive regulation of mitotic cell cycle	17/565	163/18670	9.4725e-06	0.000362456	0.000298512	HSF1/EIF4EBP1/MAD2L1/UBE2C/ASNS/FBXO5/RANBP1/CCNE1/CCNB1/ESPL1/CDC25A/LGMN/CDC25B/NUSAP1/CDC6/EGFR/ADAMTS1	17
GO:0006007	glucose catabolic process	8/565	36/18670	9.5838e-06	0.000362456	0.000298512	PGK1/TPI1/PFKL/ENO1/PFKP/ALDOC/GPI/ALDOA	8
GO:0009167	purine ribonucleoside monophosphate metabolic process	8/565	36/18670	9.5838e-06	0.000362456	0.000298512	APRT/ADK/GMPS/GART/PPAT/GUK1/HPRT1/IMPDH1	8
GO:0045841	negative regulation of mitotic metaphase/anaphase transition	8/565	36/18670	9.5838e-06	0.000362456	0.000298512	MAD2L1/TRIP13/CDC20/FBXO5/BUB1/TTK/CCNB1/AURKB	8
GO:0009113	purine nucleobase biosynthetic process	5/565	11/18670	9.90434e-06	0.000371534	0.000305988	APRT/GMPS/GART/PPAT/HPRT1	5
GO:0043624	cellular protein complex disassembly	20/565	217/18670	1.04051e-05	0.000387172	0.000318867	MRPL13/MRPL15/MRPL12/KIF2C/MRPS18A/MRPL42/KATNB1/MRPL18/MRPL39/MRPL33/MRPS12/MRPS28/MRPL17/MRPL48/MRPL35/MID1/MRPS33/EIF5A/HSPA8/ASPH	20
GO:0006165	nucleoside diphosphate phosphorylation	15/565	132/18670	1.12208e-05	0.000414183	0.000341113	PGK1/SUCLG1/TPI1/PFKL/ENO1/PFKP/PGM1/ALDOC/GPI/NUP155/ALDOA/LDHA/NUP93/DDIT4/PFKFB3	15
GO:0051784	negative regulation of nuclear division	10/565	60/18670	1.14908e-05	0.000420783	0.000346548	CHEK1/MAD2L1/TRIP13/PTTG1/CDC20/FBXO5/BUB1/TTK/CCNB1/AURKB	10
GO:0009126	purine nucleoside monophosphate metabolic process	8/565	37/18670	1.19061e-05	0.000429176	0.000353461	APRT/ADK/GMPS/GART/PPAT/GUK1/HPRT1/IMPDH1	8
GO:1902100	negative regulation of metaphase/anaphase transition of cell cycle	8/565	37/18670	1.19061e-05	0.000429176	0.000353461	MAD2L1/TRIP13/CDC20/FBXO5/BUB1/TTK/CCNB1/AURKB	8
GO:0060249	anatomical structure homeostasis	31/565	439/18670	1.20836e-05	0.000432201	0.000355952	CCT7/RFC2/CCT5/CCT2/RFC4/SPP1/EXO1/PRDX1/RAD51/POLD2/CCNE1/CCNE2/SOD1/CALB2/RAC3/AURKB/RECQL4/CCT8/LAMP2/ALDOA/BAX/LOX/MYC/HOMER1/FEN1/PTH/EGFR/NEK2/TFRC/CDH3/PROM1	31
GO:0009135	purine nucleoside diphosphate metabolic process	15/565	134/18670	1.34727e-05	0.000474527	0.000390811	PGK1/TPI1/PFKL/ENO1/PFKP/PGM1/ALDOC/GPI/NUP155/GUK1/ALDOA/LDHA/NUP93/DDIT4/PFKFB3	15
GO:0009179	purine ribonucleoside diphosphate metabolic process	15/565	134/18670	1.34727e-05	0.000474527	0.000390811	PGK1/TPI1/PFKL/ENO1/PFKP/PGM1/ALDOC/GPI/NUP155/GUK1/ALDOA/LDHA/NUP93/DDIT4/PFKFB3	15
GO:0009165	nucleotide biosynthetic process	23/565	278/18670	1.37837e-05	0.000481805	0.000396805	APRT/ADK/CYC1/PDHA1/RRM2/GMPS/ELOVL1/TBPL1/GART/ENO1/KYNU/DLD/UPP1/PPAT/ADORA2B/GUK1/ALDOA/HPRT1/IMPDH1/SLC25A1/IDH2/NNMT/SCD	23
GO:0090068	positive regulation of cell cycle process	24/565	298/18670	1.41091e-05	0.000489469	0.000403117	MAD2L1/UBE2C/FBXO5/RANBP1/RACGAP1/CCNE1/CCNB1/AURKB/ESPL1/BAX/E2F1/CDC25A/EZH2/FEN1/CDC25B/NUSAP1/CDC6/ECT2/EGFR/SPAG5/ADAMTS1/GATA6/KIF14/SFN	24
GO:0032543	mitochondrial translation	15/565	135/18670	1.47421e-05	0.000507613	0.00041806	MRPL13/MRPL15/MRPL12/MRPS18A/MRPL42/MRPL18/MRPL39/MRPL33/SHMT2/MRPS12/MRPS28/MRPL17/MRPL48/MRPL35/MRPS33	15
GO:0006006	glucose metabolic process	19/565	204/18670	1.48522e-05	0.000507614	0.000418061	PGK1/PDHA1/PHLDA2/TPI1/MDH2/PFKL/G6PD/DDB1/ENO1/PFKP/PGM1/ALDOC/ATF4/GPI/MDH1/ALDOA/PTH/SLC25A1/ATF3	19
GO:0006521	regulation of cellular amino acid metabolic process	10/565	62/18670	1.55218e-05	0.000526601	0.000433699	PSMD7/PSMD14/PSMB5/PSMA7/PSMC1/PSMB2/PSMD2/PSMA4/PSMD8/PSMD3	10
GO:0009185	ribonucleoside diphosphate metabolic process	15/565	136/18670	1.61164e-05	0.000542782	0.000447025	PGK1/TPI1/PFKL/ENO1/PFKP/PGM1/ALDOC/GPI/NUP155/GUK1/ALDOA/LDHA/NUP93/DDIT4/PFKFB3	15
GO:0009161	ribonucleoside monophosphate metabolic process	9/565	50/18670	1.65374e-05	0.000545643	0.000449381	APRT/ADK/GMPS/GART/UPP1/PPAT/GUK1/HPRT1/IMPDH1	9
GO:0042398	cellular modified amino acid biosynthetic process	9/565	50/18670	1.65374e-05	0.000545643	0.000449381	GCLM/PTDSS1/GART/PLOD3/PLOD2/PLOD1/PLSCR1/CKB/BBOX1	9
GO:0051988	regulation of attachment of spindle microtubules to kinetochore	5/565	12/18670	1.65561e-05	0.000545643	0.000449381	RACGAP1/CCNB1/ECT2/NEK2/SPAG5	5
GO:0051304	chromosome separation	12/565	90/18670	1.6755e-05	0.000548281	0.000451553	MAD2L1/TRIP13/PTTG1/CDC20/FBXO5/BUB1/TTK/CCNB1/AURKB/CENPE/ESPL1/CDC6	12
GO:1902750	negative regulation of cell cycle G2/M phase transition	13/565	105/18670	1.7013e-05	0.000552804	0.000455279	PSMD7/PSMD14/CHEK1/PSMB5/PSMA7/PSMC1/PSMB2/PSMD2/AURKB/PSMA4/PSMD8/CDC6/PSMD3	13
GO:0019318	hexose metabolic process	21/565	244/18670	1.7957e-05	0.000579397	0.00047718	PGK1/PDHA1/PHLDA2/TPI1/MDH2/GALK2/PFKL/G6PD/DDB1/ENO1/PFKP/PGM1/ALDOC/ATF4/GPI/MDH1/ALDOA/PTH/SLC25A1/ATF3/PFKFB3	21
GO:0009132	nucleoside diphosphate metabolic process	16/565	154/18670	1.80913e-05	0.000579676	0.00047741	PGK1/SUCLG1/TPI1/PFKL/ENO1/PFKP/PGM1/ALDOC/GPI/NUP155/GUK1/ALDOA/LDHA/NUP93/DDIT4/PFKFB3	16
GO:0048002	antigen processing and presentation of peptide antigen	18/565	189/18670	1.83367e-05	0.000580066	0.000477731	PSMD7/PSMD14/PSMB5/PSMA7/KIF2C/BCAP31/PSMC1/PSMB2/RACGAP1/KIF4A/PSMD2/CENPE/AP2S1/PSMA4/PSMD8/LGMN/PSMD3/KIF11	18
GO:0016579	protein deubiquitination	23/565	283/18670	1.83549e-05	0.000580066	0.000477731	PSMD7/ENY2/PSMD14/PSMB5/CCNA2/PSMA7/CDC20/ADRM1/PSMC1/PSMB2/SHMT2/UCHL1/UCHL3/COPS5/ACTL6A/PSMD2/PSMA4/PSMD8/UCHL5/SNX3/CDC25A/MYC/PSMD3	23
GO:2001233	regulation of apoptotic signaling pathway	29/565	406/18670	1.86142e-05	0.000584258	0.000481183	BNIP3/PDCD5/S100A9/S100A8/GCLM/VDAC2/BCAP31/FAIM/ENO1/LTBR/TNFRSF12A/PLAUR/YWHAQ/STK3/SOD1/SOD2/FZD9/MLLT11/BAX/E2F1/RPS7/HRK/FGG/YWHAZ/TPD52L1/SFN/FGB/HMOX1/ATF3	29
GO:0061418	regulation of transcription from RNA polymerase II promoter in response to hypoxia	11/565	77/18670	1.936e-05	0.0006023	0.000496043	PSMD7/PSMD14/PSMB5/PSMA7/PSMC1/PSMB2/CA9/PSMD2/PSMA4/PSMD8/PSMD3	11
GO:0048146	positive regulation of fibroblast proliferation	9/565	51/18670	1.95483e-05	0.0006023	0.000496043	CCNA2/ANXA2/CCNB1/E2F1/MYC/FN1/CDC6/EGFR/S100A6	9
GO:0046031	ADP metabolic process	14/565	122/18670	1.95806e-05	0.0006023	0.000496043	PGK1/TPI1/PFKL/ENO1/PFKP/PGM1/ALDOC/GPI/NUP155/ALDOA/LDHA/NUP93/DDIT4/PFKFB3	14
GO:0051054	positive regulation of DNA metabolic process	18/565	191/18670	2.11486e-05	0.000646222	0.000532216	HSF1/CCT7/RFC2/CCT5/CCT2/RFC4/RAD51/CEBPG/AURKB/CCT8/BAX/MYC/WT1/EGFR/NEK2/TFRC/ANXA3/GREM1	18
GO:0046390	ribose phosphate biosynthetic process	18/565	192/18670	2.26939e-05	0.000688879	0.000567348	APRT/ADK/CYC1/PDHA1/GMPS/ELOVL1/GART/G6PD/ENO1/DLD/UPP1/PPAT/GUK1/ALDOA/HPRT1/IMPDH1/SLC25A1/SCD	18
GO:0051225	spindle assembly	13/565	108/18670	2.31037e-05	0.000696736	0.000573818	BIRC5/CDC20/FBXO5/RACGAP1/MYBL2/KIF4A/TPX2/AURKB/FLNA/KIF11/NEK2/SPAG5/ASPM	13
GO:0010972	negative regulation of G2/M transition of mitotic cell cycle	12/565	93/18670	2.3471e-05	0.000703216	0.000579155	PSMD7/PSMD14/PSMB5/PSMA7/PSMC1/PSMB2/PSMD2/AURKB/PSMA4/PSMD8/CDC6/PSMD3	12
GO:0002478	antigen processing and presentation of exogenous peptide antigen	17/565	175/18670	2.41132e-05	0.000717797	0.000591163	PSMD7/PSMD14/PSMB5/PSMA7/KIF2C/PSMC1/PSMB2/RACGAP1/KIF4A/PSMD2/CENPE/AP2S1/PSMA4/PSMD8/LGMN/PSMD3/KIF11	17
GO:0097193	intrinsic apoptotic signaling pathway	23/565	289/18670	2.562e-05	0.000757762	0.000624078	BNIP3/S100A9/S100A8/VDAC2/MELK/BCAP31/ENO1/PLAUR/PDCD10/SOD1/HRAS/ATF4/SOD2/CEBPB/MLLT11/BAX/E2F1/CD24/RPS7/DDIT4/E2F2/SFN/HMOX1	23
GO:0046916	cellular transition metal ion homeostasis	13/565	110/18670	2.81545e-05	0.00082742	0.000681447	S100A9/S100A8/ABCB6/SLC31A1/SOD1/MT1G/MYC/SLC39A4/MT1H/PRNP/TFRC/HMOX1/LCN2	13
GO:0046365	monosaccharide catabolic process	10/565	67/18670	3.12653e-05	0.000907283	0.00074722	PGK1/TPI1/GALK2/PFKL/ENO1/PFKP/PGM1/ALDOC/GPI/ALDOA	10
GO:2000573	positive regulation of DNA biosynthetic process	10/565	67/18670	3.12653e-05	0.000907283	0.00074722	CCT7/RFC2/CCT5/CCT2/RFC4/AURKB/CCT8/MYC/NEK2/GREM1	10
GO:0097327	response to antineoplastic agent	12/565	96/18670	3.24175e-05	0.000934841	0.000769917	HSF1/EIF4EBP1/SRD5A1/ADAM9/ASNS/DNMT3B/RAD51/SLC31A1/DDIT4/EGFR/CDH1/HMOX1	12
GO:0000723	telomere maintenance	16/565	162/18670	3.39401e-05	0.000972669	0.000801071	CCT7/RFC2/CCT5/CCT2/RFC4/EXO1/RAD51/POLD2/CCNE1/CCNE2/AURKB/RECQL4/CCT8/MYC/FEN1/NEK2	16
GO:0019884	antigen processing and presentation of exogenous antigen	17/565	182/18670	3.99028e-05	0.00113604	0.00093562	PSMD7/PSMD14/PSMB5/PSMA7/KIF2C/PSMC1/PSMB2/RACGAP1/KIF4A/PSMD2/CENPE/AP2S1/PSMA4/PSMD8/LGMN/PSMD3/KIF11	17
GO:1901657	glycosyl compound metabolic process	14/565	130/18670	4.01332e-05	0.00113604	0.00093562	APRT/ADK/AMD1/GMPS/TK1/AHCY/UPP1/PPAT/MFN1/GUK1/HPRT1/IMPDH1/TH/AKR1B10	14
GO:0090263	positive regulation of canonical Wnt signaling pathway	15/565	147/18670	4.05969e-05	0.00114216	0.00094066	PSMD7/PSMD14/PSMB5/PSMA7/PSMC1/PSMB2/PSMD2/FZD9/VPS35/PSMA4/PSMD8/PSMD3/EGFR/ASPM/CDH3	15
GO:0070646	protein modification by small protein removal	23/565	299/18670	4.36258e-05	0.00121994	0.00100472	PSMD7/ENY2/PSMD14/PSMB5/CCNA2/PSMA7/CDC20/ADRM1/PSMC1/PSMB2/SHMT2/UCHL1/UCHL3/COPS5/ACTL6A/PSMD2/PSMA4/PSMD8/UCHL5/SNX3/CDC25A/MYC/PSMD3	23
GO:0070498	interleukin-1-mediated signaling pathway	12/565	100/18670	4.88563e-05	0.00135646	0.00111715	PSMD7/PSMD14/PSMB5/IRAK1/PSMA7/PSMC1/PSMB2/RIPK2/PSMD2/PSMA4/PSMD8/PSMD3	12
GO:0009260	ribonucleotide biosynthetic process	17/565	185/18670	4.90959e-05	0.00135646	0.00111715	APRT/ADK/CYC1/PDHA1/GMPS/ELOVL1/GART/ENO1/DLD/UPP1/PPAT/GUK1/ALDOA/HPRT1/IMPDH1/SLC25A1/SCD	17
GO:0034614	cellular response to reactive oxygen species	16/565	168/18670	5.28838e-05	0.00145242	0.00119618	HSF1/BNIP3/CCNA2/GLRX2/TXN/HDAC2/PRDX1/PDCD10/SOD1/SOD2/EZH2/ECT2/EGFR/GPR37/NET1/LCN2	16
GO:0072522	purine-containing compound biosynthetic process	18/565	205/18670	5.41835e-05	0.00147931	0.00121833	APRT/ADK/AMD1/CYC1/PDHA1/GMPS/ELOVL1/GART/ENO1/DLD/PPAT/ADORA2B/GUK1/ALDOA/HPRT1/IMPDH1/SLC25A1/SCD	18
GO:0006261	DNA-dependent DNA replication	15/565	151/18670	5.54726e-05	0.00150559	0.00123998	RFC2/CDC34/MCM10/RFC4/FBXO5/RAD51/POLD2/CCNE1/CCNE2/RECQL4/GMNN/FEN1/CDC6/HMGA1/MCM2	15
GO:0009123	nucleoside monophosphate metabolic process	10/565	72/18670	5.90461e-05	0.00155074	0.00127716	APRT/ADK/GMPS/GART/TK1/UPP1/PPAT/GUK1/HPRT1/IMPDH1	10
GO:1902036	regulation of hematopoietic stem cell differentiation	10/565	72/18670	5.90461e-05	0.00155074	0.00127716	PSMD7/PSMD14/PSMB5/PSMA7/PSMC1/PSMB2/PSMD2/PSMA4/PSMD8/PSMD3	10
GO:0007094	mitotic spindle assembly checkpoint	7/565	34/18670	5.91749e-05	0.00155074	0.00127716	MAD2L1/TRIP13/CDC20/BUB1/TTK/CCNB1/AURKB	7
GO:0031577	spindle checkpoint	7/565	34/18670	5.91749e-05	0.00155074	0.00127716	MAD2L1/TRIP13/CDC20/BUB1/TTK/CCNB1/AURKB	7
GO:0071173	spindle assembly checkpoint	7/565	34/18670	5.91749e-05	0.00155074	0.00127716	MAD2L1/TRIP13/CDC20/BUB1/TTK/CCNB1/AURKB	7
GO:0071174	mitotic spindle checkpoint	7/565	34/18670	5.91749e-05	0.00155074	0.00127716	MAD2L1/TRIP13/CDC20/BUB1/TTK/CCNB1/AURKB	7
GO:0000079	regulation of cyclin-dependent protein serine/threonine kinase activity	12/565	102/18670	5.94889e-05	0.00155074	0.00127716	CCNB2/CCNA2/CDKN3/CCNC/CCNE1/CCNE2/CCNB1/CDKN2A/CDC25A/CDC6/EGFR/SFN	12
GO:1903046	meiotic cell cycle process	17/565	188/18670	6.01135e-05	0.00155822	0.00128332	HSF1/TRIP13/PTTG1/CDC20/RAD54B/FBXO5/BUB1/RAD51/TTK/CCNE1/CCNE2/ESPL1/FANCA/CDC25A/ACTR3/CDC25B/ASPM	17
GO:0018126	protein hydroxylation	6/565	24/18670	6.32175e-05	0.00162953	0.00134205	P4HA2/P4HA1/PLOD3/PLOD2/PLOD1/ASPH	6
GO:0001836	release of cytochrome c from mitochondria	9/565	59/18670	6.51298e-05	0.00166949	0.00137496	BNIP3/PDCD5/PLAUR/SOD2/FZD9/MLLT11/BAX/HRK/SFN	9
GO:0097237	cellular response to toxic substance	20/565	247/18670	6.70083e-05	0.00170816	0.0014068	PRDX4/HSF1/BNIP3/S100A9/TXN/HDAC2/PRDX1/SLC31A1/PDCD10/SOD1/SOD2/EZH2/TH/ECT2/GPR37/CCL7/NET1/AKR1B10/HMOX1/LCN2	20
GO:0009152	purine ribonucleotide biosynthetic process	16/565	172/18670	7.0194e-05	0.00176981	0.00145758	APRT/ADK/CYC1/PDHA1/GMPS/ELOVL1/GART/ENO1/DLD/PPAT/GUK1/ALDOA/HPRT1/IMPDH1/SLC25A1/SCD	16
GO:0140013	meiotic nuclear division	16/565	172/18670	7.0194e-05	0.00176981	0.00145758	HSF1/TRIP13/PTTG1/CDC20/RAD54B/FBXO5/BUB1/RAD51/TTK/CCNE1/CCNE2/ESPL1/FANCA/ACTR3/CDC25B/ASPM	16
GO:0046128	purine ribonucleoside metabolic process	9/565	60/18670	7.45955e-05	0.00186916	0.0015394	APRT/ADK/AMD1/GMPS/AHCY/MFN1/GUK1/HPRT1/IMPDH1	9
GO:0009119	ribonucleoside metabolic process	10/565	74/18670	7.49446e-05	0.00186916	0.0015394	APRT/ADK/AMD1/GMPS/AHCY/UPP1/MFN1/GUK1/HPRT1/IMPDH1	10
GO:0006164	purine nucleotide biosynthetic process	17/565	192/18670	7.81697e-05	0.00193911	0.00159702	APRT/ADK/CYC1/PDHA1/GMPS/ELOVL1/GART/ENO1/DLD/PPAT/ADORA2B/GUK1/ALDOA/HPRT1/IMPDH1/SLC25A1/SCD	17
GO:0043174	nucleoside salvage	5/565	16/18670	8.25651e-05	0.0020372	0.00167779	APRT/ADK/TK1/UPP1/HPRT1	5
GO:0043161	proteasome-mediated ubiquitin-dependent protein catabolic process	28/565	419/18670	8.32528e-05	0.00204324	0.00168277	PSMD7/PSMD14/MAD2L1/PSMB5/PSMA7/PTTG1/UBE2C/CDC20/CDC34/BCAP31/PSMC1/PSMB2/DDB1/FBXO5/UCHL1/CCNB1/PSMD2/AURKB/PSMA4/PSMD8/KCTD5/UCHL5/SDCBP/PBK/PSMD3/TRIM2/KIF14/IFI27	28
GO:0002479	antigen processing and presentation of exogenous peptide antigen via MHC class I, TAP-dependent	10/565	75/18670	8.41686e-05	0.00205478	0.00169228	PSMD7/PSMD14/PSMB5/PSMA7/PSMC1/PSMB2/PSMD2/PSMA4/PSMD8/PSMD3	10
GO:0032200	telomere organization	16/565	175/18670	8.62647e-05	0.00208746	0.00171919	CCT7/RFC2/CCT5/CCT2/RFC4/EXO1/RAD51/POLD2/CCNE1/CCNE2/AURKB/RECQL4/CCT8/MYC/FEN1/NEK2	16
GO:0009116	nucleoside metabolic process	12/565	106/18670	8.68644e-05	0.00208746	0.00171919	APRT/ADK/AMD1/GMPS/TK1/AHCY/UPP1/PPAT/MFN1/GUK1/HPRT1/IMPDH1	12
GO:1904029	regulation of cyclin-dependent protein kinase activity	12/565	106/18670	8.68644e-05	0.00208746	0.00171919	CCNB2/CCNA2/CDKN3/CCNC/CCNE1/CCNE2/CCNB1/CDKN2A/CDC25A/CDC6/EGFR/SFN	12
GO:0060071	Wnt signaling pathway, planar cell polarity pathway	12/565	108/18670	0.00010421	0.00249132	0.0020518	PSMD7/PSMD14/PSMB5/PSMA7/PSMC1/PSMB2/DKK1/PSMD2/AP2S1/PSMA4/PSMD8/PSMD3	12
GO:0042278	purine nucleoside metabolic process	9/565	63/18670	0.000110199	0.00260748	0.00214747	APRT/ADK/AMD1/GMPS/AHCY/MFN1/GUK1/HPRT1/IMPDH1	9
GO:0046686	response to cadmium ion	9/565	63/18670	0.000110199	0.00260748	0.00214747	HSF1/SOD1/MT1G/PTH/MT1H/EGFR/PRNP/NUDT1/HMOX1	9
GO:0030177	positive regulation of Wnt signaling pathway	16/565	179/18670	0.00011266	0.0026521	0.00218422	PSMD7/PSMD14/PSMB5/PSMA7/PSMC1/PSMB2/DKK1/PSMD2/FZD9/VPS35/PSMA4/PSMD8/PSMD3/EGFR/ASPM/CDH3	16
GO:0061013	regulation of mRNA catabolic process	17/565	199/18670	0.000121444	0.00284439	0.00234258	PSMD7/EXOSC4/PSMD14/PSMB5/PSMA7/CARHSP1/PSMC1/PSMB2/PKP3/PSMD2/PSMA4/PSMD8/E2F1/PSMD3/YWHAZ/HSPA8/PKP1	17
GO:0006979	response to oxidative stress	29/565	451/18670	0.000122389	0.00285202	0.00234887	PRDX4/HSF1/BNIP3/PSMB5/CCNA2/GCLM/ADAM9/GLRX2/MELK/G6PD/TXN/HDAC2/PRDX1/PDCD10/SOD1/ATF4/SOD2/LDHA/EZH2/SDC1/ECT2/EGFR/GPR37/PRNP/NUDT1/NET1/HMOX1/CRYAB/LCN2	29
GO:0140053	mitochondrial gene expression	15/565	162/18670	0.000123557	0.00286479	0.00235939	MRPL13/MRPL15/MRPL12/MRPS18A/MRPL42/MRPL18/MRPL39/MRPL33/SHMT2/MRPS12/MRPS28/MRPL17/MRPL48/MRPL35/MRPS33	15
GO:0090175	regulation of establishment of planar polarity	12/565	110/18670	0.00012445	0.00287105	0.00236454	PSMD7/PSMD14/PSMB5/PSMA7/PSMC1/PSMB2/DKK1/PSMD2/AP2S1/PSMA4/PSMD8/PSMD3	12
GO:0033044	regulation of chromosome organization	24/565	342/18670	0.000126503	0.00290392	0.00239161	CCT7/CHEK1/MAD2L1/TRIP13/CCT5/PTTG1/CDC20/CCT2/FBXO5/BUB1/DNMT3B/TTK/CCNB1/AURKB/CENPE/CCT8/ESPL1/MYC/ATAD2/FEN1/CDC6/NEK2/HMGA1/MCM2	24
GO:0000460	maturation of 5.8S rRNA	6/565	27/18670	0.000128698	0.00292932	0.00241253	EXOSC4/WDR12/MPHOSPH6/PES1/RPS21/RRS1	6
GO:0051402	neuron apoptotic process	19/565	239/18670	0.00012888	0.00292932	0.00241253	BNIP3/GCLM/CDC34/G6PD/MYBL2/SOD1/HRAS/ATF4/SOD2/FZD9/CEBPB/BAX/LGMN/TNFRSF21/PRNP/EN1/TRIM2/KIF14/HMOX1	19
GO:0042590	antigen processing and presentation of exogenous peptide antigen via MHC class I	10/565	79/18670	0.000131304	0.00296979	0.00244586	PSMD7/PSMD14/PSMB5/PSMA7/PSMC1/PSMB2/PSMD2/PSMA4/PSMD8/PSMD3	10
GO:0006119	oxidative phosphorylation	14/565	145/18670	0.000132272	0.00297708	0.00245187	PGK1/UQCRB/UQCRH/CYC1/COX5A/COX4I1/COX7B/SHMT2/NDUFAB1/SDHA/CCNB1/DLD/COX7A2/UQCRFS1	14
GO:0031146	SCF-dependent proteasomal ubiquitin-dependent protein catabolic process	11/565	95/18670	0.000138601	0.0031044	0.00255672	PSMD7/PSMD14/PSMB5/PSMA7/PSMC1/PSMB2/PSMD2/PSMA4/PSMD8/PSMD3/KIF14	11
GO:2001251	negative regulation of chromosome organization	14/565	146/18670	0.000142326	0.00317242	0.00261274	MAD2L1/TRIP13/PTTG1/CDC20/FBXO5/BUB1/DNMT3B/TTK/CCNB1/AURKB/ESPL1/ATAD2/HMGA1/MCM2	14
GO:0030388	fructose 1,6-bisphosphate metabolic process	4/565	10/18670	0.000150694	0.00327972	0.00270111	PFKL/PFKP/ALDOC/ALDOA	4
GO:0051231	spindle elongation	4/565	10/18670	0.000150694	0.00327972	0.00270111	RACGAP1/PRC1/KIF4A/AURKB	4
GO:1903405	protein localization to nuclear body	4/565	10/18670	0.000150694	0.00327972	0.00270111	CCT7/CCT5/CCT2/CCT8	4
GO:1904851	positive regulation of establishment of protein localization to telomere	4/565	10/18670	0.000150694	0.00327972	0.00270111	CCT7/CCT5/CCT2/CCT8	4
GO:1904867	protein localization to Cajal body	4/565	10/18670	0.000150694	0.00327972	0.00270111	CCT7/CCT5/CCT2/CCT8	4
GO:0002474	antigen processing and presentation of peptide antigen via MHC class I	11/565	96/18670	0.000152343	0.00330004	0.00271785	PSMD7/PSMD14/PSMB5/PSMA7/BCAP31/PSMC1/PSMB2/PSMD2/PSMA4/PSMD8/PSMD3	11
GO:0034698	response to gonadotropin	6/565	28/18670	0.000159639	0.00344194	0.00283471	CCNA2/GCLM/SRD5A1/ASNS/WT1/GATA6	6
GO:0002223	stimulatory C-type lectin receptor signaling pathway	12/565	113/18670	0.00016109	0.00345707	0.00284717	PSMD7/PSMD14/PSMB5/PSMA7/PSMC1/PSMB2/PSMD2/HRAS/PSMA4/PSMD8/NRAS/PSMD3	12
GO:0070997	neuron death	24/565	348/18670	0.000164639	0.00351688	0.00289643	HSF1/BNIP3/GCLM/CDC34/PSMC1/G6PD/MYBL2/DKK1/SOD1/HRAS/ATF4/SOD2/FZD9/CEBPB/VPS35/BAX/LGMN/DDIT4/TNFRSF21/PRNP/EN1/TRIM2/KIF14/HMOX1	24
GO:0042775	mitochondrial ATP synthesis coupled electron transport	11/565	97/18670	0.000167224	0.00355564	0.00292835	UQCRB/UQCRH/CYC1/COX5A/COX4I1/COX7B/NDUFAB1/SDHA/CCNB1/DLD/UQCRFS1	11
GO:0031638	zymogen activation	8/565	53/18670	0.000178677	0.00378172	0.00311455	PGK1/ENO1/RIPK2/ANXA2/LGMN/FGG/FGB/ASPH	8
GO:0042773	ATP synthesis coupled electron transport	11/565	98/18670	0.000183322	0.00386231	0.00318092	UQCRB/UQCRH/CYC1/COX5A/COX4I1/COX7B/NDUFAB1/SDHA/CCNB1/DLD/UQCRFS1	11
GO:0042180	cellular ketone metabolic process	19/565	246/18670	0.000187466	0.00392408	0.00323179	PSMD7/ADM/PSMD14/PSMB5/SRD5A1/PSMA7/TPI1/COQ3/COQ2/PSMC1/PSMB2/PSMD2/KYNU/PSMA4/PSMD8/TDO2/PSMD3/AKR1B10/STARD3	19
GO:0019882	antigen processing and presentation	18/565	226/18670	0.000187954	0.00392408	0.00323179	PSMD7/PSMD14/PSMB5/PSMA7/KIF2C/BCAP31/PSMC1/PSMB2/RACGAP1/KIF4A/PSMD2/CENPE/AP2S1/PSMA4/PSMD8/LGMN/PSMD3/KIF11	18
GO:0048145	regulation of fibroblast proliferation	10/565	83/18670	0.000199004	0.00411751	0.0033911	CCNA2/ANXA2/CCNB1/BAX/E2F1/MYC/FN1/CDC6/EGFR/S100A6	10
GO:0060218	hematopoietic stem cell differentiation	10/565	83/18670	0.000199004	0.00411751	0.0033911	PSMD7/PSMD14/PSMB5/PSMA7/PSMC1/PSMB2/PSMD2/PSMA4/PSMD8/PSMD3	10
GO:0055076	transition metal ion homeostasis	13/565	133/18670	0.000201545	0.00415148	0.00341907	S100A9/S100A8/ABCB6/SLC31A1/SOD1/MT1G/MYC/SLC39A4/MT1H/PRNP/TFRC/HMOX1/LCN2	13
GO:0006401	RNA catabolic process	26/565	397/18670	0.000203649	0.00415197	0.00341948	PSMD7/EXOSC4/PSMD14/PSMB5/PSMA7/PELO/CARHSP1/PSMC1/PSMB2/RPS21/PKP3/RNASEH2A/PSMD2/RPL6/PSMA4/PSMD8/E2F1/FEN1/RPS7/RPS24/PSMD3/RPL7/YWHAZ/LSM1/HSPA8/PKP1	26
GO:0046112	nucleobase biosynthetic process	5/565	19/18670	0.000203852	0.00415197	0.00341948	APRT/GMPS/GART/PPAT/HPRT1	5
GO:0030199	collagen fibril organization	8/565	54/18670	0.000204269	0.00415197	0.00341948	P4HA1/PLOD3/PLOD2/PLOD1/ANXA2/LOX/GREM1/COL11A1	8
GO:0002220	innate immune response activating cell surface receptor signaling pathway	12/565	116/18670	0.000206582	0.00416232	0.003428	PSMD7/PSMD14/PSMB5/PSMA7/PSMC1/PSMB2/PSMD2/HRAS/PSMA4/PSMD8/NRAS/PSMD3	12
GO:1900180	regulation of protein localization to nucleus	12/565	116/18670	0.000206582	0.00416232	0.003428	CCT7/BYSL/CCT5/CCT2/NOLC1/CCT8/NMD3/FLNA/ECT2/CDH1/ZIC1/TRIM29	12
GO:0051321	meiotic cell cycle	19/565	249/18670	0.000219003	0.00439203	0.00361719	HSF1/TRIP13/PTTG1/CDC20/RAD54B/EXO1/FBXO5/BUB1/RAD51/TTK/CCNE1/CCNE2/ESPL1/FANCA/CDC25A/ACTR3/CDC25B/NEK2/ASPM	19
GO:0048144	fibroblast proliferation	10/565	84/18670	0.000219887	0.00439203	0.00361719	CCNA2/ANXA2/CCNB1/BAX/E2F1/MYC/FN1/CDC6/EGFR/S100A6	10
GO:0002758	innate immune response-activating signal transduction	12/565	117/18670	0.000223995	0.00443568	0.00365314	PSMD7/PSMD14/PSMB5/PSMA7/PSMC1/PSMB2/PSMD2/HRAS/PSMA4/PSMD8/NRAS/PSMD3	12
GO:0022904	respiratory electron transport chain	12/565	117/18670	0.000223995	0.00443568	0.00365314	UQCRB/UQCRH/CYC1/COX5A/COX4I1/COX7B/NDUFAB1/ETFB/SDHA/CCNB1/DLD/UQCRFS1	12
GO:0044282	small molecule catabolic process	28/565	445/18670	0.000228179	0.00449922	0.00370547	PGK1/PHYH/IMPA2/TPI1/GALK2/PFKL/AHCY/ENO1/SHMT2/ETFB/PFKP/PGM1/ALDOC/MCCC1/KYNU/GPI/HMMR/DLD/UPP1/PPAT/ALDOA/BCAT1/TDO2/HPRT1/NUDT1/AKR1B10/CYP39A1/ALDH3B2	28
GO:0070203	regulation of establishment of protein localization to telomere	4/565	11/18670	0.000231145	0.0045345	0.00373453	CCT7/CCT5/CCT2/CCT8	4
GO:0043523	regulation of neuron apoptotic process	17/565	210/18670	0.000231934	0.0045345	0.00373453	GCLM/CDC34/G6PD/MYBL2/SOD1/HRAS/ATF4/SOD2/FZD9/CEBPB/BAX/LGMN/PRNP/EN1/TRIM2/KIF14/HMOX1	17
GO:1901214	regulation of neuron death	22/565	313/18670	0.000233691	0.00454958	0.00374695	HSF1/GCLM/CDC34/PSMC1/G6PD/MYBL2/DKK1/SOD1/HRAS/ATF4/SOD2/FZD9/CEBPB/VPS35/BAX/LGMN/DDIT4/PRNP/EN1/TRIM2/KIF14/HMOX1	22
GO:0071478	cellular response to radiation	16/565	191/18670	0.00023859	0.00461407	0.00380006	HSF1/CHEK1/DDB1/RAD51/AURKB/HRAS/ATF4/BAX/RAD51AP1/CDC25A/MYC/PBK/CNGA1/ECT2/NET1/CRYAB	16
GO:0090200	positive regulation of release of cytochrome c from mitochondria	6/565	30/18670	0.000239004	0.00461407	0.00380006	BNIP3/PDCD5/PLAUR/MLLT11/BAX/HRK	6
GO:1901532	regulation of hematopoietic progenitor cell differentiation	10/565	85/18670	0.000242577	0.00466355	0.00384081	PSMD7/PSMD14/PSMB5/PSMA7/PSMC1/PSMB2/PSMD2/PSMA4/PSMD8/PSMD3	10
GO:0006402	mRNA catabolic process	24/565	364/18670	0.000320545	0.00613691	0.00505424	PSMD7/EXOSC4/PSMD14/PSMB5/PSMA7/PELO/CARHSP1/PSMC1/PSMB2/RPS21/PKP3/PSMD2/RPL6/PSMA4/PSMD8/E2F1/RPS7/RPS24/PSMD3/RPL7/YWHAZ/LSM1/HSPA8/PKP1	24
GO:0043488	regulation of mRNA stability	15/565	177/18670	0.000326715	0.00622919	0.00513024	PSMD7/EXOSC4/PSMD14/PSMB5/PSMA7/CARHSP1/PSMC1/PSMB2/PSMD2/PSMA4/PSMD8/E2F1/PSMD3/YWHAZ/HSPA8	15
GO:0070202	regulation of establishment of protein localization to chromosome	4/565	12/18670	0.000338439	0.00636403	0.00524129	CCT7/CCT5/CCT2/CCT8	4
GO:1904816	positive regulation of protein localization to chromosome, telomeric region	4/565	12/18670	0.000338439	0.00636403	0.00524129	CCT7/CCT5/CCT2/CCT8	4
GO:1990173	protein localization to nucleoplasm	4/565	12/18670	0.000338439	0.00636403	0.00524129	CCT7/CCT5/CCT2/CCT8	4
GO:0006144	purine nucleobase metabolic process	5/565	21/18670	0.000339305	0.00636403	0.00524129	APRT/GMPS/GART/PPAT/HPRT1	5
GO:0031100	animal organ regeneration	9/565	73/18670	0.000345931	0.00646204	0.00532201	ADM/CCNA2/PPAT/CEBPB/EZH2/EGFR/NNMT/HMOX1/ANXA3	9
GO:1901989	positive regulation of cell cycle phase transition	11/565	106/18670	0.000366115	0.00681152	0.00560983	UBE2C/FBXO5/CCNE1/CCNB1/ESPL1/CDC25A/EZH2/CDC25B/CDC6/EGFR/ADAMTS1	11
GO:2000241	regulation of reproductive process	14/565	160/18670	0.000369761	0.00685171	0.00564294	PRDX4/TRIP13/PHLDA2/CDC20/HDAC2/FBXO5/TTK/STK3/CDC25A/SPINK1/CDC25B/WT1/ASPM/DEFB1	14
GO:0051204	protein insertion into mitochondrial membrane	7/565	45/18670	0.000374369	0.00690935	0.0056904	PDCD5/TIMM13/YWHAQ/BAX/E2F1/YWHAZ/SFN	7
GO:0097755	positive regulation of blood vessel diameter	8/565	59/18670	0.000381406	0.00698565	0.00575325	ADM/PLOD3/SOD1/SOD2/ADORA2B/EGFR/HMOX1/RGS2	8
GO:1900182	positive regulation of protein localization to nucleus	9/565	74/18670	0.000383452	0.00698565	0.00575325	CCT7/CCT5/CCT2/CCT8/NMD3/FLNA/ECT2/CDH1/ZIC1	9
GO:0001736	establishment of planar polarity	12/565	124/18670	0.000384559	0.00698565	0.00575325	PSMD7/PSMD14/PSMB5/PSMA7/PSMC1/PSMB2/DKK1/PSMD2/AP2S1/PSMA4/PSMD8/PSMD3	12
GO:0007164	establishment of tissue polarity	12/565	124/18670	0.000384559	0.00698565	0.00575325	PSMD7/PSMD14/PSMB5/PSMA7/PSMC1/PSMB2/DKK1/PSMD2/AP2S1/PSMA4/PSMD8/PSMD3	12
GO:0045471	response to ethanol	12/565	125/18670	0.000413965	0.00749034	0.0061689	EIF4EBP1/PSMD14/S100A8/GGH/G6PD/HDAC2/SOD1/PTH/TH/CCL7/RGS2/CLDN3	12
GO:1901992	positive regulation of mitotic cell cycle phase transition	10/565	91/18670	0.000423888	0.00761692	0.00627315	UBE2C/FBXO5/CCNE1/CCNB1/ESPL1/CDC25A/CDC25B/CDC6/EGFR/ADAMTS1	10
GO:0051303	establishment of chromosome localization	9/565	75/18670	0.000424263	0.00761692	0.00627315	KIF2C/KATNB1/CDCA8/RRS1/CCNB1/CENPE/ACTR3/SPAG5/KIF14	9
GO:1904666	regulation of ubiquitin protein ligase activity	5/565	22/18670	0.000428248	0.00765866	0.00630752	MAD2L1/UBE2C/CDC20/FBXO5/RPS7	5
GO:0051260	protein homooligomerization	23/565	351/18670	0.000462411	0.0082377	0.00678441	HSF1/PFKL/ANGPTL4/TK1/SHMT2/RAD51/PFKP/SOD2/KCNG1/PPAT/VPS35/ALDOA/BAX/KCTD5/TDO2/HPRT1/HRK/ECT2/PRNP/HMOX1/CRYAB/LCN2/CLDN3	23
GO:0043487	regulation of RNA stability	15/565	183/18670	0.000466038	0.00827039	0.00681133	PSMD7/EXOSC4/PSMD14/PSMB5/PSMA7/CARHSP1/PSMC1/PSMB2/PSMD2/PSMA4/PSMD8/E2F1/PSMD3/YWHAZ/HSPA8	15
GO:0050000	chromosome localization	9/565	76/18670	0.000468581	0.00828366	0.00682226	KIF2C/KATNB1/CDCA8/RRS1/CCNB1/CENPE/ACTR3/SPAG5/KIF14	9
GO:0006596	polyamine biosynthetic process	4/565	13/18670	0.000477196	0.00840376	0.00692117	AMD1/SRM/SMOX/SMS	4
GO:0032212	positive regulation of telomere maintenance via telomerase	6/565	34/18670	0.000488565	0.00853879	0.00703238	CCT7/CCT5/CCT2/AURKB/CCT8/NEK2	6
GO:0042558	pteridine-containing compound metabolic process	6/565	34/18670	0.000488565	0.00853879	0.00703238	MTHFD2/PTS/GGH/GART/SLC19A1/SHMT2	6
GO:0090151	establishment of protein localization to mitochondrial membrane	7/565	47/18670	0.000492472	0.00857459	0.00706187	PDCD5/TIMM13/YWHAQ/BAX/E2F1/YWHAZ/SFN	7
GO:0072331	signal transduction by p53 class mediator	19/565	267/18670	0.000524548	0.00909875	0.00749355	NDRG1/CHEK1/RFC2/RFC4/HDAC2/EXO1/RRS1/TPX2/CCNB1/AURKB/BAX/PAK1IP1/E2F1/RPS7/DDIT4/TAF13/SMYD2/E2F2/SFN	19
GO:0051205	protein insertion into membrane	8/565	62/18670	0.000537248	0.00928413	0.00764623	PDCD5/TIMM13/YWHAQ/BAX/E2F1/EGFR/YWHAZ/SFN	8
GO:0051656	establishment of organelle localization	25/565	401/18670	0.000556575	0.00958222	0.00789173	CENPA/MAD2L1/TMED9/KIF2C/KATNB1/CDCA8/ZNF593/RRS1/YKT6/UCHL1/PDCD10/CCNB1/CENPE/ESPL1/ADORA2B/AP3S1/ACTR3/NMD3/NUSAP1/YWHAZ/SPAG5/KIF14/CDH3/HMOX1/STARD3	25

## Sheet: EGO.DOWN
Table S7_2. Go enrichment of downregulated genes ( p.adjust < 0.01) (high-risk group vs. low-risk group)
ID	Description	GeneRatio	BgRatio	pvalue	p.adjust	qvalue	Symbol	Count
GO:0030098	lymphocyte differentiation	45/567	353/18670	3.25753e-16	1.62714e-12	1.19466e-12	PTPN6/GATA3/BCL2/MYB/HHEX/CCL19/GLI3/RASGRP1/RUNX1/INPP5D/CD3E/CD8A/ZAP70/DOCK10/PIK3R1/FLT3/ITK/RORC/LEF1/CD79A/ITM2A/CD2/CD79B/STAT3/LYL1/GPR18/CD3G/STAT6/LY9/IL18R1/PLCL2/CD19/CR2/RARA/LCK/IRF1/CD74/CD3D/BATF/BCL11B/EGR3/BMP4/PTPRC/KIT/ZBTB16	45
GO:0042110	T cell activation	51/567	464/18670	1.60262e-15	4.00254e-12	2.9387e-12	IL6ST/KIF13B/PTPN6/GATA3/BCL2/MYB/PYCARD/CCL19/GLI3/RASGRP1/RUNX1/CD3E/CD8A/CD6/ZAP70/PIK3R1/ITK/RORC/LEF1/RAC2/CD2/STAT3/BTN3A1/CD44/GPR18/CD3G/STAT6/CD1C/LY9/IL18R1/WAS/LCP1/RARA/LCK/IRF1/CCL5/CD74/CD3D/BATF/CCL21/PRLR/ICOS/BCL11B/PAK1/EGR3/BMP4/PTPRC/KIT/GJA1/VTCN1/ZBTB16	51
GO:0030217	T cell differentiation	32/567	240/18670	2.05776e-12	3.42617e-09	2.51552e-09	GATA3/BCL2/MYB/CCL19/GLI3/RASGRP1/RUNX1/CD3E/CD8A/ZAP70/ITK/RORC/LEF1/CD2/STAT3/GPR18/CD3G/STAT6/LY9/IL18R1/RARA/LCK/IRF1/CD74/CD3D/BATF/BCL11B/EGR3/BMP4/PTPRC/KIT/ZBTB16	32
GO:0046632	alpha-beta T cell differentiation	20/567	101/18670	2.16327e-11	2.70138e-08	1.98338e-08	GATA3/BCL2/MYB/CCL19/GLI3/RUNX1/ZAP70/ITK/RORC/LEF1/STAT3/GPR18/STAT6/LY9/IL18R1/RARA/IRF1/BATF/BCL11B/ZBTB16	20
GO:0030879	mammary gland development	23/567	143/18670	5.97265e-11	5.47521e-08	4.01994e-08	GATA3/ESR1/TGFB3/JAK2/GLI3/ATP7B/BTRC/LEF1/AR/NCOR2/MST1/PGR/STAT6/NCOA1/TBX3/WNT5A/CSF1R/CCND1/PRLR/BMP4/ERBB4/GJA1/SOX9	23
GO:0045058	T cell selection	14/567	47/18670	6.57683e-11	5.47521e-08	4.01994e-08	GATA3/BCL2/GLI3/CD3E/ZAP70/STAT3/CD3G/STAT6/LY9/CD74/CD3D/BATF/BCL11B/PTPRC	14
GO:0043368	positive T cell selection	12/567	34/18670	1.63417e-10	1.16466e-07	8.55103e-08	BCL2/CD3E/ZAP70/STAT3/CD3G/STAT6/LY9/CD74/CD3D/BATF/BCL11B/PTPRC	12
GO:0046631	alpha-beta T cell activation	22/567	138/18670	1.86532e-10	1.16466e-07	8.55103e-08	GATA3/BCL2/MYB/CCL19/GLI3/RUNX1/CD3E/ZAP70/ITK/RORC/LEF1/STAT3/GPR18/STAT6/LY9/IL18R1/RARA/IRF1/BATF/BCL11B/PTPRC/ZBTB16	22
GO:0022407	regulation of cell-cell adhesion	38/567	402/18670	6.26741e-10	3.47014e-07	2.5478e-07	IL6ST/PTPN6/GATA3/MYB/PYCARD/JAK2/CCL19/GLI3/RASGRP1/ABAT/RUNX1/CD3E/CD6/ZAP70/PIK3R1/LEF1/FOXA1/EPB41L5/CD44/PRKCD/JAG1/CELSR2/CXCL12/WNT5A/RARA/LCK/IRF1/CCL5/CD74/CCL21/ICOS/PAK1/EGR3/BMP4/PTPRC/CXCL13/VTCN1/ZBTB16	38
GO:0050851	antigen receptor-mediated signaling pathway	33/567	316/18670	6.94722e-10	3.47014e-07	2.5478e-07	PTPN6/GATA3/BCL2/NFKB1/ELF1/IKBKB/RUNX1/INPP5D/BTRC/CD3E/PRKCH/PSME1/ZAP70/PIK3R1/ITK/VAV3/CD79A/UBASH3A/CD79B/BTN3A1/CD3G/WAS/PLCL2/BTN3A2/CD19/HLA-DQB1/LCK/LCP2/CD3D/PAK1/HLA-DQA1/PTPRC/VTCN1	33
GO:0060326	cell chemotaxis	32/567	304/18670	1.0364e-09	4.70618e-07	3.45532e-07	P2RX4/CCL19/IL16/CXCL14/VAV3/LEF1/RAC2/MST1/STK39/CXCR3/GPR18/F7/C5/MTUS1/CCL22/PRKCD/SEMA5A/THBS4/CXCL12/CX3CR1/WNT5A/TRPM4/CCL5/CD74/AGTR1/PDGFRB/CCL21/CSF3R/CXCL9/EGR3/CXCL13/KIT	32
GO:0043401	steroid hormone mediated signaling pathway	24/567	182/18670	1.53135e-09	6.37423e-07	4.68001e-07	CALCOCO1/ESR1/PIAS1/JAK2/NCOR1/RUNX1/CRY2/NRIP1/RORC/LEF1/FOXA1/DDX17/AR/NCOR2/UBE3A/PGR/NCOA1/NR2F2/SCGB2A2/RARA/DAB2/ESRRG/PAK1/BMP4	24
GO:0045785	positive regulation of cell adhesion	37/567	403/18670	2.36479e-09	8.86768e-07	6.51072e-07	IL6ST/PTPN6/GATA3/MYB/PYCARD/JAK2/CCL19/GLI3/RASGRP1/RUNX1/CD3E/CD6/ZAP70/PIK3R1/VAV3/FOXA1/ABI3BP/AGR2/EPB41L5/CD44/CXCL12/WNT5A/RARA/IQGAP1/LCK/CCL5/NEDD9/CD74/COL16A1/CCL21/ICOS/PAK1/EGR3/PTPRC/CXCL13/VTCN1/ZBTB16	37
GO:0070661	leukocyte proliferation	31/567	298/18670	2.52841e-09	8.86768e-07	6.51072e-07	IL6ST/PTPN6/BCL2/PURA/HHEX/PYCARD/CCL19/INPP5D/CD3E/CD6/ZAP70/FLT3/VAV3/LEF1/RAC2/CD79A/BTN3A1/IMPDH2/PLCL2/PRKCD/CD19/CR2/IRF1/CCL5/CSF1R/CD74/BMP4/PTPRC/KIT/GJA1/VTCN1	31
GO:0050852	T cell receptor signaling pathway	25/567	202/18670	2.66297e-09	8.86768e-07	6.51072e-07	PTPN6/GATA3/NFKB1/ELF1/IKBKB/INPP5D/BTRC/CD3E/PSME1/ZAP70/PIK3R1/ITK/UBASH3A/BTN3A1/CD3G/WAS/BTN3A2/HLA-DQB1/LCK/LCP2/CD3D/PAK1/HLA-DQA1/PTPRC/VTCN1	25
GO:0014065	phosphatidylinositol 3-kinase signaling	21/567	148/18670	4.28296e-09	1.26398e-06	9.28022e-07	PTPN6/GATA3/JAK2/NF1/RASGRP1/PIK3R1/FLT3/IGF1R/ERBB3/SEMA4D/UBE3A/ENTPD5/PLXNB1/HCLS1/IRS1/CCL5/PDGFRB/PTPN13/ERBB4/KIT/SOX9	21
GO:0002064	epithelial cell development	25/567	207/18670	4.42831e-09	1.26398e-06	9.28022e-07	LAMB2/ADD1/ESR1/HSD17B4/IKBKB/FLNB/FNDC3A/FOXA1/ARID4A/AR/EPB41L5/PGR/SLC4A7/ARID4B/ATRX/JAG1/WNT5A/RARA/IQGAP1/CLDN5/BCL11B/BMP4/SPDEF/GJA1/SOX9	25
GO:0022409	positive regulation of cell-cell adhesion	28/567	255/18670	4.55487e-09	1.26398e-06	9.28022e-07	IL6ST/PTPN6/GATA3/MYB/PYCARD/CCL19/GLI3/RASGRP1/RUNX1/CD3E/CD6/ZAP70/PIK3R1/FOXA1/CD44/WNT5A/RARA/LCK/CCL5/CD74/CCL21/ICOS/PAK1/EGR3/PTPRC/CXCL13/VTCN1/ZBTB16	28
GO:0002429	immune response-activating cell surface receptor signaling pathway	40/567	473/18670	5.63505e-09	1.40735e-06	1.03329e-06	PTPN6/GATA3/BCL2/NFKB1/MUC1/CREBBP/ELF1/CYFIP2/IKBKB/RUNX1/INPP5D/BTRC/CD3E/PRKCH/PSME1/ZAP70/PIK3R1/ITK/VAV3/CD79A/UBASH3A/RPS6KA5/CD79B/BTN3A1/CD3G/WAS/ICAM3/PLCL2/PRKCD/BTN3A2/CD19/CR2/HLA-DQB1/LCK/LCP2/CD3D/PAK1/HLA-DQA1/PTPRC/VTCN1	40
GO:0002757	immune response-activating signal transduction	40/567	473/18670	5.63505e-09	1.40735e-06	1.03329e-06	PTPN6/GATA3/BCL2/NFKB1/MUC1/CREBBP/ELF1/CYFIP2/IKBKB/RUNX1/INPP5D/BTRC/CD3E/PRKCH/PSME1/ZAP70/PIK3R1/ITK/VAV3/CD79A/UBASH3A/RPS6KA5/CD79B/BTN3A1/CD3G/WAS/ICAM3/PLCL2/PRKCD/BTN3A2/CD19/CR2/HLA-DQB1/LCK/LCP2/CD3D/PAK1/HLA-DQA1/PTPRC/VTCN1	40
GO:0008584	male gonad development	20/567	138/18670	6.90461e-09	1.57393e-06	1.15559e-06	GATA3/BCL2/ESR1/HSD17B4/FNDC3A/ARID4A/AR/NCOA1/LRP2/ARID4B/ATRX/TNFSF10/WNT5A/RARA/PDGFRB/CCND1/LRRC6/KIT/GJA1/SOX9	20
GO:0048015	phosphatidylinositol-mediated signaling	23/567	181/18670	6.93221e-09	1.57393e-06	1.15559e-06	PTPN6/GATA3/OGT/JAK2/NF1/RASGRP1/PIK3R1/FLT3/IGF1R/ERBB3/SEMA4D/UBE3A/ENTPD5/PLXNB1/HCLS1/IRS1/CCL5/CSF1R/PDGFRB/PTPN13/ERBB4/KIT/SOX9	23
GO:0046546	development of primary male sexual characteristics	20/567	139/18670	7.84045e-09	1.70274e-06	1.25017e-06	GATA3/BCL2/ESR1/HSD17B4/FNDC3A/ARID4A/AR/NCOA1/LRP2/ARID4B/ATRX/TNFSF10/WNT5A/RARA/PDGFRB/CCND1/LRRC6/KIT/GJA1/SOX9	20
GO:0050900	leukocyte migration	41/567	499/18670	8.28642e-09	1.72461e-06	1.26622e-06	PTPN6/GATA3/P2RX4/PYCARD/CCL19/IL16/CXCL14/INPP5D/ZAP70/PIK3R1/VAV3/RAC2/MST1/STK39/CD2/CXCR3/CD44/GPR18/SLC7A8/F7/SELL/C5/MTUS1/CCL22/ATP1B1/THBS4/CXCL12/CX3CR1/WNT5A/LCK/CD48/TRPM4/CCL5/CD74/CCL21/CSF3R/CXCL9/CXCL13/KIT/APOD/COL1A2	41
GO:0048017	inositol lipid-mediated signaling	23/567	184/18670	9.52754e-09	1.9036e-06	1.39764e-06	PTPN6/GATA3/OGT/JAK2/NF1/RASGRP1/PIK3R1/FLT3/IGF1R/ERBB3/SEMA4D/UBE3A/ENTPD5/PLXNB1/HCLS1/IRS1/CCL5/CSF1R/PDGFRB/PTPN13/ERBB4/KIT/SOX9	23
GO:0050870	positive regulation of T cell activation	24/567	202/18670	1.24968e-08	2.327e-06	1.70851e-06	IL6ST/PTPN6/GATA3/MYB/PYCARD/CCL19/GLI3/RASGRP1/RUNX1/CD3E/CD6/ZAP70/PIK3R1/RARA/LCK/CCL5/CD74/CCL21/ICOS/PAK1/EGR3/PTPRC/VTCN1/ZBTB16	24
GO:1903039	positive regulation of leukocyte cell-cell adhesion	25/567	218/18670	1.28065e-08	2.327e-06	1.70851e-06	IL6ST/PTPN6/GATA3/MYB/PYCARD/CCL19/GLI3/RASGRP1/RUNX1/CD3E/CD6/ZAP70/PIK3R1/CD44/RARA/LCK/CCL5/CD74/CCL21/ICOS/PAK1/EGR3/PTPRC/VTCN1/ZBTB16	25
GO:0007159	leukocyte cell-cell adhesion	32/567	337/18670	1.30443e-08	2.327e-06	1.70851e-06	IL6ST/PTPN6/GATA3/MYB/PYCARD/CCL19/GLI3/RASGRP1/RUNX1/CD3E/CD6/ZAP70/PIK3R1/RAC2/SEMA4D/CD44/SELL/CXCL12/CX3CR1/RARA/LCK/IRF1/CCL5/CD74/CCL21/ICOS/PAK1/EGR3/BMP4/PTPRC/VTCN1/ZBTB16	32
GO:0046661	male sex differentiation	21/567	160/18670	1.76289e-08	2.95475e-06	2.1694e-06	GATA3/BCL2/ESR1/HSD17B4/FNDC3A/ARID4A/AR/NCOA1/LRP2/TBX3/ARID4B/ATRX/TNFSF10/WNT5A/RARA/PDGFRB/CCND1/LRRC6/KIT/GJA1/SOX9	21
GO:0030099	myeloid cell differentiation	36/567	416/18670	1.84193e-08	2.95475e-06	2.1694e-06	PTPN6/SNRK/GATA3/ADD1/CREBBP/JAK2/NF1/CCL19/RUNX1/INPP5D/STAT5B/TNRC6B/PIK3R1/LEF1/ADAR/ARID4A/KLF2/RASSF2/STAT3/TGFBR3/NFKBIA/JAG1/EVI2B/HCLS1/RARA/IRF8/CSF1R/CD74/BATF/CSF3R/KLF13/BMP4/STAT1/KIT/ZBTB16/FOS	36
GO:0007162	negative regulation of cell adhesion	29/567	289/18670	1.8678e-08	2.95475e-06	2.1694e-06	PTPN6/MUC1/JAK2/ARHGDIB/NF1/GLI3/ABAT/RUNX1/RASA1/CLASP2/PIK3R1/ERBB3/EPB41L5/SEMA4D/FBLN1/PRKCD/DLC1/PLXNB1/SEMA5A/JAG1/CXCL12/IRF1/CD74/CCL21/SEMA6A/BMP4/PTPRC/APOD/VTCN1	29
GO:0046651	lymphocyte proliferation	28/567	272/18670	1.89294e-08	2.95475e-06	2.1694e-06	IL6ST/PTPN6/BCL2/PURA/PYCARD/CCL19/INPP5D/CD3E/CD6/ZAP70/FLT3/VAV3/LEF1/RAC2/CD79A/BTN3A1/IMPDH2/PLCL2/PRKCD/CD19/CR2/IRF1/CCL5/CD74/BMP4/PTPRC/GJA1/VTCN1	28
GO:0051897	positive regulation of protein kinase B signaling	22/567	176/18670	1.99917e-08	2.97608e-06	2.18506e-06	GATA3/ESR1/P2RX4/CCL19/PIK3R1/IGF1R/RAC2/ERBB3/F7/SEMA5A/HCLS1/CD19/CX3CR1/IRS1/LCK/OSBPL8/RAMP3/PDGFRB/CCL21/ICOS/ERBB4/KIT	22
GO:0045137	development of primary sexual characteristics	25/567	223/18670	2.02576e-08	2.97608e-06	2.18506e-06	GATA3/BCL2/ESR1/HSD17B4/DACH1/NRIP1/FNDC3A/ARID4A/AR/UBE3A/PGR/NCOA1/LRP2/ARID4B/ATRX/TNFSF10/WNT5A/RARA/BMPR1B/PDGFRB/CCND1/LRRC6/KIT/GJA1/SOX9	25
GO:0032943	mononuclear cell proliferation	28/567	274/18670	2.21979e-08	3.16795e-06	2.32593e-06	IL6ST/PTPN6/BCL2/PURA/PYCARD/CCL19/INPP5D/CD3E/CD6/ZAP70/FLT3/VAV3/LEF1/RAC2/CD79A/BTN3A1/IMPDH2/PLCL2/PRKCD/CD19/CR2/IRF1/CCL5/CD74/BMP4/PTPRC/GJA1/VTCN1	28
GO:0032355	response to estradiol	19/567	134/18670	2.36937e-08	3.2875e-06	2.41371e-06	TXNIP/ESR1/STAT5B/NRIP1/ARNT2/FOXA1/NCOR2/STAT3/F7/NCOA1/NR2F2/RARA/EEF2/SLC6A4/RAMP3/PDGFRB/CCND1/RBBP8/GJA1	19
GO:0051271	negative regulation of cellular component movement	34/567	384/18670	2.63191e-08	3.55308e-06	2.6087e-06	NISCH/PTPRT/GATA3/BCL2/ARHGDIB/NF1/DACH1/CLASP2/SEMA4D/STAT3/TGFBR3/GPR18/C5/WAS/NR2F2/FBLN1/DLC1/SEMA5A/JAG1/CXCL12/CX3CR1/WNT5A/OSBPL8/CD74/CCL21/SEMA6A/IFITM1/SEMA3C/RHOB/COL3A1/NAV3/ERBB4/CXCL13/APOD	34
GO:0014066	regulation of phosphatidylinositol 3-kinase signaling	18/567	124/18670	3.81903e-08	5.02001e-06	3.68573e-06	PTPN6/JAK2/RASGRP1/PIK3R1/FLT3/IGF1R/ERBB3/SEMA4D/UBE3A/ENTPD5/PLXNB1/HCLS1/CCL5/PDGFRB/PTPN13/ERBB4/KIT/SOX9	18
GO:0009755	hormone-mediated signaling pathway	25/567	233/18670	4.86228e-08	6.00562e-06	4.40937e-06	CALCOCO1/ESR1/PIAS1/JAK2/NCOR1/RUNX1/CRY2/NRIP1/RORC/LEF1/FOXA1/DDX17/AR/NCOR2/UBE3A/PGR/NCOA1/NR2F2/SCGB2A2/RARA/DAB2/ESRRG/PRLR/PAK1/BMP4	25
GO:0014068	positive regulation of phosphatidylinositol 3-kinase signaling	15/567	87/18670	5.02087e-08	6.00562e-06	4.40937e-06	PTPN6/JAK2/PIK3R1/FLT3/IGF1R/ERBB3/SEMA4D/UBE3A/PLXNB1/HCLS1/CCL5/PDGFRB/ERBB4/KIT/SOX9	15
GO:0008406	gonad development	24/567	217/18670	5.04977e-08	6.00562e-06	4.40937e-06	GATA3/BCL2/ESR1/HSD17B4/NRIP1/FNDC3A/ARID4A/AR/UBE3A/PGR/NCOA1/LRP2/ARID4B/ATRX/TNFSF10/WNT5A/RARA/BMPR1B/PDGFRB/CCND1/LRRC6/KIT/GJA1/SOX9	24
GO:0050920	regulation of chemotaxis	24/567	217/18670	5.04977e-08	6.00562e-06	4.40937e-06	P2RX4/CCL19/IL16/CXCL14/RAC2/MST1/STK39/SEMA4D/GPR18/F7/C5/MTUS1/SEMA5A/THBS4/BMPR2/CXCL12/WNT5A/CCL5/CD74/PDGFRB/CCL21/SEMA6A/SEMA3C/CXCL13	24
GO:0110111	negative regulation of animal organ morphogenesis	10/567	35/18670	5.7094e-08	6.63219e-06	4.86941e-06	GATA3/BCL2/CHAD/BCOR/BMPR2/WNT5A/BMP4/ASPN/STAT1/CITED1	10
GO:0043434	response to peptide hormone	36/567	436/18670	6.09486e-08	6.91092e-06	5.07406e-06	BTG2/VAMP2/NFKB1/OGT/HHEX/TFF1/STC2/CISH/JAK2/STAT5B/SORL1/PIK3R1/IGF1R/GNAI2/PTPRE/STAT3/TGFBR3/F7/STAT6/ADCY9/STAT4/PRKCD/CXCL12/TNFSF10/IRS1/IQGAP1/QDPR/OSBPL8/AGTR1/BTG1/PRLR/PAK1/RAB31/STAT1/CITED1/GJA1	36
GO:0007548	sex differentiation	27/567	270/18670	6.22606e-08	6.91092e-06	5.07406e-06	GATA3/BCL2/ESR1/HSD17B4/NIPBL/DACH1/NRIP1/FNDC3A/ARID4A/AR/UBE3A/PGR/NCOA1/LRP2/TBX3/ARID4B/ATRX/TNFSF10/WNT5A/RARA/BMPR1B/PDGFRB/CCND1/LRRC6/KIT/GJA1/SOX9	27
GO:0040013	negative regulation of locomotion	33/567	381/18670	7.14333e-08	7.75673e-06	5.69505e-06	NISCH/PTPRT/GATA3/BCL2/ARHGDIB/NF1/DACH1/CLASP2/SEMA4D/STAT3/GPR18/C5/WAS/NR2F2/FBLN1/DLC1/SEMA5A/JAG1/CXCL12/CX3CR1/WNT5A/OSBPL8/CD74/CCL21/SEMA6A/IFITM1/SEMA3C/RHOB/COL3A1/NAV3/ERBB4/CXCL13/APOD	33
GO:0018108	peptidyl-tyrosine phosphorylation	32/567	363/18670	7.52657e-08	7.99899e-06	5.87292e-06	IL6ST/PTPN6/JAK2/CD3E/TYK2/ZAP70/FLT3/ITK/IGF1R/ADRA2A/CLK4/ERBB3/SEMA4D/STAT3/CD44/PRKCD/THBS4/HCLS1/IQGAP1/LCK/CCL5/NEDD9/CSF1R/CD74/PDGFRB/PRLR/CLK1/HPX/BANK1/PTPRC/ERBB4/KIT	32
GO:0030518	intracellular steroid hormone receptor signaling pathway	18/567	130/18670	8.04016e-08	8.36679e-06	6.14297e-06	CALCOCO1/ESR1/PIAS1/JAK2/NCOR1/RUNX1/CRY2/NRIP1/FOXA1/DDX17/AR/NCOR2/UBE3A/PGR/NCOA1/SCGB2A2/DAB2/PAK1	18
GO:0018212	peptidyl-tyrosine modification	32/567	366/18670	9.10274e-08	9.25277e-06	6.79346e-06	IL6ST/PTPN6/JAK2/CD3E/TYK2/ZAP70/FLT3/ITK/IGF1R/ADRA2A/CLK4/ERBB3/SEMA4D/STAT3/CD44/PRKCD/THBS4/HCLS1/IQGAP1/LCK/CCL5/NEDD9/CSF1R/CD74/PDGFRB/PRLR/CLK1/HPX/BANK1/PTPRC/ERBB4/KIT	32
GO:0030595	leukocyte chemotaxis	24/567	224/18670	9.26203e-08	9.25277e-06	6.79346e-06	CCL19/IL16/CXCL14/VAV3/RAC2/MST1/STK39/CXCR3/GPR18/F7/C5/MTUS1/CCL22/THBS4/CXCL12/WNT5A/TRPM4/CCL5/CD74/CCL21/CSF3R/CXCL9/CXCL13/KIT	24
GO:0045061	thymic T cell selection	8/567	21/18670	9.88732e-08	9.68376e-06	7.10989e-06	GATA3/GLI3/CD3E/ZAP70/CD3G/CD74/CD3D/PTPRC	8
GO:0022612	gland morphogenesis	17/567	120/18670	1.3114e-07	1.2597e-05	9.2488e-06	BCL2/ESR1/BTBD7/TGFB3/GLI3/BTRC/FOXA1/AR/HPN/PGR/STAT6/TBX3/WNT5A/CSF1R/SEMA3C/BMP4/SOX9	17
GO:0048608	reproductive structure development	35/567	431/18670	1.39877e-07	1.31828e-05	9.6789e-06	GATA3/BCL2/ESR1/HSD17B4/STC2/GLI3/NIPBL/NRIP1/FNDC3A/LEF1/FOXA1/ARID4A/AR/UBE3A/PGR/NCOA1/LRP2/TBX3/NR2F2/ARID4B/ATRX/BMPR2/TNFSF10/WNT5A/RARA/BMPR1B/PDGFRB/CCND1/LRRC6/BMP4/KIT/CITED1/GJA1/SOX9/NDP	35
GO:0033077	T cell differentiation in thymus	13/567	70/18670	1.58356e-07	1.4496e-05	1.06431e-05	GATA3/BCL2/GLI3/RASGRP1/CD3E/ZAP70/CD3G/CD74/CD3D/BCL11B/EGR3/BMP4/PTPRC	13
GO:0071383	cellular response to steroid hormone stimulus	25/567	248/18670	1.64438e-07	1.4496e-05	1.06431e-05	CALCOCO1/ESR1/PIAS1/JAK2/NCOR1/RUNX1/CRY2/NRIP1/FLT3/RORC/LEF1/FOXA1/DDX17/AR/NCOR2/UBE3A/PGR/NCOA1/NR2F2/SCGB2A2/RARA/DAB2/ESRRG/PAK1/BMP4	25
GO:0048732	gland development	35/567	434/18670	1.6542e-07	1.4496e-05	1.06431e-05	GATA3/BCL2/ESR1/BTBD7/TGFB3/JAK2/NF1/GLI3/ATP7B/BTRC/LEF1/FOXA1/AR/NCOR2/MST1/HPN/TGFBR3/UBE3A/FRZB/PGR/STAT6/NCOA1/TBX3/WNT5A/RARA/QDPR/CSF1R/CCND1/PRLR/SEMA3C/BCL11B/BMP4/ERBB4/GJA1/SOX9	35
GO:0061458	reproductive system development	35/567	434/18670	1.6542e-07	1.4496e-05	1.06431e-05	GATA3/BCL2/ESR1/HSD17B4/STC2/GLI3/NIPBL/NRIP1/FNDC3A/LEF1/FOXA1/ARID4A/AR/UBE3A/PGR/NCOA1/LRP2/TBX3/NR2F2/ARID4B/ATRX/BMPR2/TNFSF10/WNT5A/RARA/BMPR1B/PDGFRB/CCND1/LRRC6/BMP4/KIT/CITED1/GJA1/SOX9/NDP	35
GO:1903037	regulation of leukocyte cell-cell adhesion	28/567	304/18670	2.01107e-07	1.73195e-05	1.27161e-05	IL6ST/PTPN6/GATA3/MYB/PYCARD/CCL19/GLI3/RASGRP1/RUNX1/CD3E/CD6/ZAP70/PIK3R1/CD44/CXCL12/RARA/LCK/IRF1/CCL5/CD74/CCL21/ICOS/PAK1/EGR3/BMP4/PTPRC/VTCN1/ZBTB16	28
GO:0002460	adaptive immune response based on somatic recombination of immune receptors built from immunoglobulin superfamily domains	31/567	361/18670	2.16132e-07	1.8298e-05	1.34345e-05	PARP3/PTPN6/GATA3/CCL19/INPP5D/CD8A/RORC/LEF1/STAT3/STAT6/CD1C/SUPT6H/C5/LY9/IL18R1/WAS/PRKCD/C7/BTN3A2/JAG1/CD19/CR2/HLA-DQB1/TRPM4/CD74/BATF/HPX/SERPING1/PTPRC/CXCL13/C1S	31
GO:1903708	positive regulation of hemopoiesis	21/567	185/18670	2.22512e-07	1.83241e-05	1.34537e-05	GATA3/MYB/CCL19/GLI3/RASGRP1/RUNX1/INPP5D/STAT5B/ZAP70/LEF1/STAT3/JAG1/EVI2B/HCLS1/RARA/CD74/EGR3/PTPRC/STAT1/ZBTB16/FOS	21
GO:0061180	mammary gland epithelium development	13/567	72/18670	2.23778e-07	1.83241e-05	1.34537e-05	GATA3/ESR1/JAK2/BTRC/AR/MST1/PGR/STAT6/TBX3/WNT5A/CSF1R/CCND1/ERBB4	13
GO:0048545	response to steroid hormone	32/567	383/18670	2.56046e-07	2.06282e-05	1.51454e-05	CALCOCO1/TXNIP/BCL2/ESR1/PIAS1/TGFB3/JAK2/NCOR1/RUNX1/CRY2/NRIP1/FLT3/RORC/LEF1/FOXA1/DDX17/AR/NCOR2/UBE3A/PGR/NCOA1/NR2F2/SCGB2A2/RARA/DAB2/ESRRG/CCND1/PAK1/ABCA3/BMP4/FOS/TAT	32
GO:0002688	regulation of leukocyte chemotaxis	16/567	114/18670	3.49177e-07	2.76776e-05	2.03211e-05	CCL19/CXCL14/RAC2/MST1/STK39/GPR18/F7/C5/MTUS1/THBS4/CXCL12/WNT5A/CCL5/CD74/CCL21/CXCL13	16
GO:0007411	axon guidance	26/567	276/18670	3.54627e-07	2.76776e-05	2.03211e-05	SPTAN1/LAMB2/GATA3/GFRA1/CYFIP2/GLI3/PIK3R1/RAC2/SEMA4D/RPS6KA5/FLRT2/LAMA2/PLXNB1/SEMA5A/BMPR2/CXCL12/WNT5A/BMPR1B/CSF1R/SEMA6A/SEMA3C/PLA2G10/BCL11B/ENAH/ALCAM/FLRT3	26
GO:0097485	neuron projection guidance	26/567	277/18670	3.80429e-07	2.92345e-05	2.14642e-05	SPTAN1/LAMB2/GATA3/GFRA1/CYFIP2/GLI3/PIK3R1/RAC2/SEMA4D/RPS6KA5/FLRT2/LAMA2/PLXNB1/SEMA5A/BMPR2/CXCL12/WNT5A/BMPR1B/CSF1R/SEMA6A/SEMA3C/PLA2G10/BCL11B/ENAH/ALCAM/FLRT3	26
GO:0050863	regulation of T cell activation	28/567	314/18670	3.90971e-07	2.95894e-05	2.17248e-05	IL6ST/PTPN6/GATA3/MYB/PYCARD/CCL19/GLI3/RASGRP1/RUNX1/CD3E/CD6/ZAP70/PIK3R1/RAC2/CD2/RARA/LCK/IRF1/CCL5/CD74/CCL21/ICOS/PAK1/EGR3/BMP4/PTPRC/VTCN1/ZBTB16	28
GO:0030522	intracellular receptor signaling pathway	26/567	278/18670	4.07957e-07	3.04141e-05	2.23303e-05	CALCOCO1/ASXL2/ESR1/PIAS1/JAK2/NCOR1/RUNX1/CRY2/NRIP1/RORC/FOXA1/DDX17/AR/NCOR2/STAT3/UBE3A/PGR/NCOA1/NFKBIA/NR2F2/SCGB2A2/RARA/DAB2/BIRC3/ESRRG/PAK1	26
GO:0050731	positive regulation of peptidyl-tyrosine phosphorylation	21/567	192/18670	4.1652e-07	3.05959e-05	2.24637e-05	IL6ST/JAK2/CD3E/FLT3/ADRA2A/ERBB3/SEMA4D/STAT3/CD44/THBS4/HCLS1/IQGAP1/CCL5/NEDD9/CSF1R/CD74/HPX/BANK1/PTPRC/ERBB4/KIT	21
GO:0050867	positive regulation of cell activation	32/567	394/18670	4.81813e-07	3.48791e-05	2.56085e-05	IL6ST/PTPN6/GATA3/BCL2/MYB/PYCARD/JAK2/CCL19/GLI3/RASGRP1/RUNX1/INPP5D/CD3E/CD6/ZAP70/PIK3R1/VAV3/CD2/STAT6/WNT5A/RARA/LCK/CCL5/CD74/PDGFRB/CCL21/ICOS/PAK1/EGR3/PTPRC/VTCN1/ZBTB16	32
GO:0002685	regulation of leukocyte migration	21/567	196/18670	5.87612e-07	4.19303e-05	3.07855e-05	P2RX4/PYCARD/CCL19/CXCL14/RAC2/MST1/STK39/CXCR3/GPR18/F7/C5/MTUS1/THBS4/CXCL12/CX3CR1/WNT5A/CCL5/CD74/CCL21/CXCL13/APOD	21
GO:0002285	lymphocyte activation involved in immune response	20/567	181/18670	6.65642e-07	4.64362e-05	3.40938e-05	PARP3/GATA3/MYB/CCL19/DOCK10/RORC/LEF1/ITM2A/STAT3/STAT6/CD1C/SUPT6H/LY9/IL18R1/PLCL2/LCP1/CD19/RARA/BATF/PTPRC	20
GO:0051222	positive regulation of protein transport	34/567	440/18670	6.69351e-07	4.64362e-05	3.40938e-05	PCM1/VAMP2/TPR/GATA3/BCL2/TGFB3/PYCARD/JAK2/CCL19/GLI3/RASGRP1/ABAT/SORL1/RBM22/PIK3R1/RAC2/PDZK1/GOLPH3L/CD2/GLUD1/C5/PRKCD/GLUL/HCLS1/WNT5A/TRPM4/YWHAE/CSF1R/MYRIP/PMAIP1/PAK1/ABLIM3/GJA1/VTCN1	34
GO:0003151	outflow tract morphogenesis	13/567	79/18670	6.85818e-07	4.69268e-05	3.44541e-05	NIPBL/TGFBR3/NPY1R/LRP2/TBX3/JAG1/BMPR2/WNT5A/RARA/ELN/SEMA3C/CLDN5/BMP4	13
GO:0050921	positive regulation of chemotaxis	17/567	135/18670	7.31806e-07	4.93969e-05	3.62676e-05	P2RX4/CCL19/IL16/CXCL14/RAC2/STK39/F7/SEMA5A/THBS4/BMPR2/CXCL12/WNT5A/CCL5/CD74/PDGFRB/CCL21/CXCL13	17
GO:0034341	response to interferon-gamma	21/567	199/18670	7.55787e-07	5.03255e-05	3.69493e-05	PIAS1/JAK2/CCL19/FLNB/TRIM38/CD44/WAS/CCL22/PRKCD/HLA-DQB1/WNT5A/IRF1/CCL5/IRF8/CCL21/IFITM1/GBP2/HPX/HLA-DQA1/STAT1/CITED1	21
GO:0043491	protein kinase B signaling	25/567	269/18670	7.65713e-07	5.03255e-05	3.69493e-05	GATA3/ESR1/P2RX4/CCL19/PIK3R1/IGF1R/RAC2/ERBB3/F7/SEMA5A/HCLS1/CD19/CX3CR1/IRS1/LCK/CCL5/OSBPL8/RAMP3/PDGFRB/CCL21/ICOS/BANK1/ERBB4/KIT/SOX9	25
GO:0051249	regulation of lymphocyte activation	36/567	485/18670	8.18672e-07	5.31073e-05	3.89918e-05	IL6ST/PARP3/PTPN6/GATA3/BCL2/MYB/PYCARD/CCL19/GLI3/RASGRP1/RUNX1/INPP5D/CD3E/CD6/ZAP70/PIK3R1/VAV3/RAC2/CD2/STAT6/SUPT6H/CD19/RARA/LCK/IRF1/CCL5/CD74/CCL21/ICOS/BANK1/PAK1/EGR3/BMP4/PTPRC/VTCN1/ZBTB16	36
GO:0060443	mammary gland morphogenesis	10/567	46/18670	9.38429e-07	6.00956e-05	4.41226e-05	ESR1/GLI3/BTRC/AR/PGR/STAT6/TBX3/WNT5A/CSF1R/BMP4	10
GO:0097696	receptor signaling pathway via STAT	19/567	169/18670	9.69347e-07	6.12897e-05	4.49994e-05	IL6ST/PTPRT/PIAS1/JAK2/STAT5B/FLT3/STAT3/STAT6/STAT4/HCLS1/IL10RA/CCL5/CSF1R/PRLR/HPX/PTPRC/ERBB4/STAT1/KIT	19
GO:0042113	B cell activation	27/567	310/18670	9.98589e-07	6.23494e-05	4.57774e-05	PARP3/PTPN6/BCL2/HHEX/INPP5D/ZAP70/DOCK10/PIK3R1/FLT3/VAV3/LEF1/CD79A/IGBP1/ITM2A/CD79B/LYL1/STAT6/SUPT6H/PLCL2/PRKCD/CD19/CR2/CD74/BATF/BANK1/PTPRC/KIT	27
GO:0045059	positive thymic T cell selection	6/567	13/18670	1.09331e-06	6.7421e-05	4.9501e-05	CD3E/ZAP70/CD3G/CD74/CD3D/PTPRC	6
GO:0042093	T-helper cell differentiation	11/567	58/18670	1.14778e-06	6.99169e-05	5.13335e-05	GATA3/MYB/CCL19/RORC/LEF1/STAT3/STAT6/LY9/IL18R1/RARA/BATF	11
GO:0060008	Sertoli cell differentiation	7/567	20/18670	1.26174e-06	7.59322e-05	5.575e-05	HSD17B4/FNDC3A/ARID4A/ARID4B/ATRX/RARA/SOX9	7
GO:0051251	positive regulation of lymphocyte activation	28/567	334/18670	1.34888e-06	8.02104e-05	5.88911e-05	IL6ST/PTPN6/GATA3/BCL2/MYB/PYCARD/CCL19/GLI3/RASGRP1/RUNX1/INPP5D/CD3E/CD6/ZAP70/PIK3R1/VAV3/STAT6/RARA/LCK/CCL5/CD74/CCL21/ICOS/PAK1/EGR3/PTPRC/VTCN1/ZBTB16	28
GO:0002683	negative regulation of immune system process	33/567	435/18670	1.4687e-06	8.61634e-05	6.32618e-05	PARP3/PTPN6/ELF1/TGFB3/NF1/GLI3/RUNX1/INPP5D/PIK3R1/ADAR/TRIM38/UBASH3A/GPR18/STAT6/C5/NFKBIA/PLCL2/CXCL12/RARA/IRF1/CST7/CD74/CCL21/KLF13/BANK1/SERPING1/BMP4/PTPRC/COL3A1/APOD/VTCN1/ZBTB16/SOX9	33
GO:0060485	mesenchyme development	25/567	279/18670	1.49933e-06	8.61634e-05	6.32618e-05	BCL2/TGFB3/CLASP2/LEF1/FOXA1/ERBB3/DDX17/EPB41L5/SEMA4D/HPN/TGFBR3/FRZB/MEOX1/SEMA5A/JAG1/BMPR2/WNT5A/DAB2/PDGFRB/SEMA6A/SEMA3C/BMP4/ERBB4/STAT1/SOX9	25
GO:1904951	positive regulation of establishment of protein localization	34/567	456/18670	1.50074e-06	8.61634e-05	6.32618e-05	PCM1/VAMP2/TPR/GATA3/BCL2/TGFB3/PYCARD/JAK2/CCL19/GLI3/RASGRP1/ABAT/SORL1/RBM22/PIK3R1/RAC2/PDZK1/GOLPH3L/CD2/GLUD1/C5/PRKCD/GLUL/HCLS1/WNT5A/TRPM4/YWHAE/CSF1R/MYRIP/PMAIP1/PAK1/ABLIM3/GJA1/VTCN1	34
GO:0002294	CD4-positive, alpha-beta T cell differentiation involved in immune response	11/567	60/18670	1.63517e-06	9.28146e-05	6.81452e-05	GATA3/MYB/CCL19/RORC/LEF1/STAT3/STAT6/LY9/IL18R1/RARA/BATF	11
GO:0051896	regulation of protein kinase B signaling	23/567	244/18670	1.65683e-06	9.29872e-05	6.82719e-05	GATA3/ESR1/P2RX4/CCL19/PIK3R1/IGF1R/RAC2/ERBB3/F7/SEMA5A/HCLS1/CD19/CX3CR1/IRS1/LCK/OSBPL8/RAMP3/PDGFRB/CCL21/ICOS/BANK1/ERBB4/KIT	23
GO:0007259	receptor signaling pathway via JAK-STAT	18/567	159/18670	1.68623e-06	9.35859e-05	6.87115e-05	IL6ST/PIAS1/JAK2/STAT5B/FLT3/STAT3/STAT6/STAT4/HCLS1/IL10RA/CCL5/CSF1R/PRLR/HPX/PTPRC/ERBB4/STAT1/KIT	18
GO:1902107	positive regulation of leukocyte differentiation	17/567	144/18670	1.8238e-06	0.000100109	7.35007e-05	GATA3/MYB/CCL19/GLI3/RASGRP1/RUNX1/INPP5D/ZAP70/LEF1/EVI2B/HCLS1/RARA/CD74/EGR3/PTPRC/ZBTB16/FOS	17
GO:0060009	Sertoli cell development	6/567	14/18670	1.86418e-06	0.000100415	7.37256e-05	HSD17B4/FNDC3A/ARID4A/ARID4B/ATRX/SOX9	6
GO:0030218	erythrocyte differentiation	15/567	114/18670	1.86959e-06	0.000100415	7.37256e-05	GATA3/ADD1/JAK2/INPP5D/STAT5B/ADAR/ARID4A/KLF2/STAT3/TGFBR3/HCLS1/KLF13/BMP4/STAT1/KIT	15
GO:0048872	homeostasis of number of cells	23/567	246/18670	1.90623e-06	0.000100986	7.41444e-05	GATA3/BCL2/ADD1/JAK2/INPP5D/STAT5B/DOCK10/FLT3/ADAR/ARID4A/KLF2/RASSF2/STAT3/TGFBR3/HCLS1/CD74/PMAIP1/TNFRSF17/KLF13/BMP4/STAT1/KIT/SOX9	23
GO:0002287	alpha-beta T cell activation involved in immune response	11/567	61/18670	1.94086e-06	0.000100986	7.41444e-05	GATA3/MYB/CCL19/RORC/LEF1/STAT3/STAT6/LY9/IL18R1/RARA/BATF	11
GO:0002293	alpha-beta T cell differentiation involved in immune response	11/567	61/18670	1.94086e-06	0.000100986	7.41444e-05	GATA3/MYB/CCL19/RORC/LEF1/STAT3/STAT6/LY9/IL18R1/RARA/BATF	11
GO:0002696	positive regulation of leukocyte activation	30/567	380/18670	1.97208e-06	0.000101552	7.45602e-05	IL6ST/PTPN6/GATA3/BCL2/MYB/PYCARD/CCL19/GLI3/RASGRP1/RUNX1/INPP5D/CD3E/CD6/ZAP70/PIK3R1/VAV3/CD2/STAT6/WNT5A/RARA/LCK/CCL5/CD74/CCL21/ICOS/PAK1/EGR3/PTPRC/VTCN1/ZBTB16	30
GO:0043367	CD4-positive, alpha-beta T cell differentiation	12/567	74/18670	2.16071e-06	0.00011013	8.08585e-05	GATA3/MYB/CCL19/RUNX1/RORC/LEF1/STAT3/STAT6/LY9/IL18R1/RARA/BATF	12
GO:0030183	B cell differentiation	16/567	131/18670	2.32886e-06	0.000117501	8.62705e-05	PTPN6/BCL2/HHEX/INPP5D/DOCK10/PIK3R1/FLT3/CD79A/ITM2A/CD79B/LYL1/PLCL2/CD19/CR2/PTPRC/KIT	16
GO:0071346	cellular response to interferon-gamma	19/567	180/18670	2.51953e-06	0.00012585	9.24004e-05	PIAS1/JAK2/CCL19/FLNB/TRIM38/CD44/WAS/CCL22/PRKCD/HLA-DQB1/WNT5A/IRF1/CCL5/IRF8/CCL21/GBP2/HPX/HLA-DQA1/STAT1	19
GO:0030852	regulation of granulocyte differentiation	6/567	15/18670	3.02725e-06	0.000149714	0.000109921	RUNX1/INPP5D/LEF1/EVI2B/HCLS1/RARA	6
GO:1902105	regulation of leukocyte differentiation	24/567	272/18670	3.1732e-06	0.000154023	0.000113085	PTPN6/GATA3/MYB/NF1/CCL19/GLI3/RASGRP1/RUNX1/INPP5D/ZAP70/PIK3R1/LEF1/CD2/RASSF2/EVI2B/HCLS1/RARA/IRF1/CD74/EGR3/BMP4/PTPRC/ZBTB16/FOS	24
GO:2000146	negative regulation of cell motility	28/567	349/18670	3.17604e-06	0.000154023	0.000113085	NISCH/PTPRT/GATA3/BCL2/ARHGDIB/NF1/DACH1/CLASP2/STAT3/GPR18/C5/WAS/NR2F2/FBLN1/DLC1/JAG1/CXCL12/CX3CR1/OSBPL8/CD74/CCL21/IFITM1/RHOB/COL3A1/NAV3/ERBB4/CXCL13/APOD	28
GO:1903706	regulation of hemopoiesis	34/567	475/18670	3.69274e-06	0.000177358	0.000130218	PTPN6/GATA3/CREBBP/MYB/NF1/CCL19/GLI3/RASGRP1/RUNX1/INPP5D/STAT5B/PSME1/TNRC6B/ZAP70/PIK3R1/LEF1/CD2/RASSF2/STAT3/NFKBIA/JAG1/EVI2B/HCLS1/RARA/IRF1/CD74/CSF3R/KLF13/EGR3/BMP4/PTPRC/STAT1/ZBTB16/FOS	34
GO:0050730	regulation of peptidyl-tyrosine phosphorylation	23/567	256/18670	3.75014e-06	0.000178399	0.000130982	IL6ST/PTPN6/JAK2/CD3E/FLT3/ADRA2A/ERBB3/SEMA4D/STAT3/CD44/PRKCD/THBS4/HCLS1/IQGAP1/CCL5/NEDD9/CSF1R/CD74/HPX/BANK1/PTPRC/ERBB4/KIT	23
GO:0043552	positive regulation of phosphatidylinositol 3-kinase activity	8/567	32/18670	3.80438e-06	0.000178693	0.000131198	CCL19/FLT3/VAV3/CD19/IRS1/PDGFRB/CCL21/KIT	8
GO:0048762	mesenchymal cell differentiation	21/567	220/18670	3.82785e-06	0.000178693	0.000131198	BCL2/TGFB3/CLASP2/LEF1/FOXA1/DDX17/EPB41L5/SEMA4D/HPN/TGFBR3/FRZB/SEMA5A/JAG1/WNT5A/DAB2/SEMA6A/SEMA3C/BMP4/ERBB4/STAT1/SOX9	21
GO:0030278	regulation of ossification	20/567	203/18670	4.01288e-06	0.000185596	0.000136266	IL6ST/BCL2/TGFB3/GLI3/NIPBL/SEMA4D/RASSF2/BCOR/JAG1/BMPR2/WNT5A/TRPM4/BMPR1B/IFITM1/BMP4/CITED1/OMD/GJA1/ZBTB16/SOX9	20
GO:0034101	erythrocyte homeostasis	15/567	122/18670	4.41843e-06	0.000202478	0.000148661	GATA3/ADD1/JAK2/INPP5D/STAT5B/ADAR/ARID4A/KLF2/STAT3/TGFBR3/HCLS1/KLF13/BMP4/STAT1/KIT	15
GO:0045621	positive regulation of lymphocyte differentiation	13/567	94/18670	5.1645e-06	0.000234515	0.000172183	GATA3/MYB/CCL19/GLI3/RASGRP1/RUNX1/INPP5D/ZAP70/RARA/CD74/EGR3/PTPRC/ZBTB16	13
GO:0043551	regulation of phosphatidylinositol 3-kinase activity	10/567	55/18670	5.26733e-06	0.00023703	0.000174029	CISH/CCL19/PIK3R1/FLT3/VAV3/CD19/IRS1/PDGFRB/CCL21/KIT	10
GO:0071104	response to interleukin-9	5/567	10/18670	5.63694e-06	0.000251398	0.000184578	STAT5B/IL2RG/STAT3/STAT1/CITED1	5
GO:0002292	T cell differentiation involved in immune response	11/567	68/18670	5.87285e-06	0.000259601	0.000190601	GATA3/MYB/CCL19/RORC/LEF1/STAT3/STAT6/LY9/IL18R1/RARA/BATF	11
GO:0048871	multicellular organismal homeostasis	34/567	486/18670	6.05338e-06	0.000265233	0.000194737	BCL2/ADD1/OGT/P2RX4/TFF1/JAK2/NF1/ABAT/INPP5D/BBS1/IGF1R/PER2/RAC2/STK39/STAT3/PRKAB1/TFF3/STAT6/ADCY9/IL18R1/PLCL2/ZNF423/CSF1R/ESRRG/AZGP1/PRLR/MAK/GATM/PIP/PLAC8/NOVA1/GJA1/SOX9/TFAP2B	34
GO:0072676	lymphocyte migration	14/567	111/18670	6.79327e-06	0.000295064	0.000216638	GATA3/PYCARD/CCL19/CXCL14/ZAP70/STK39/CXCR3/CCL22/CXCL12/WNT5A/CCL5/CCL21/CXCL13/APOD	14
GO:1905331	negative regulation of morphogenesis of an epithelium	6/567	17/18670	7.10666e-06	0.000306015	0.000224679	GATA3/CLASP2/WNT5A/BMP4/STAT1/CITED1	6
GO:0045582	positive regulation of T cell differentiation	12/567	83/18670	7.44021e-06	0.00031764	0.000233214	GATA3/MYB/CCL19/GLI3/RASGRP1/RUNX1/ZAP70/RARA/CD74/EGR3/PTPRC/ZBTB16	12
GO:0051047	positive regulation of secretion	31/567	428/18670	7.8287e-06	0.000331393	0.000243311	GATA3/MYB/P2RX4/TGFB3/PYCARD/PDCD6IP/JAK2/CCL19/RASGRP1/ABAT/CLASP2/GNAI2/GOLPH3L/CD2/GLUD1/C5/SYTL2/CACNA1D/RAB27B/GLUL/CXCL12/CADPS2/WNT5A/TRPM4/SLC6A4/CSF1R/MYRIP/PLA2G10/GJA1/VTCN1/GRP	31
GO:0048638	regulation of developmental growth	27/567	347/18670	8.35212e-06	0.000350579	0.000257398	BCL2/MACF1/STC2/NIPBL/STAT5B/NEDD4L/AR/AGR2/SEMA4D/STAT3/TGFBR3/NPY1R/SYT17/SEMA5A/BMPR2/CXCL12/GAMT/WNT5A/SLC6A4/CACNA2D2/SEMA6A/SEMA3C/PAK1/BMP4/PLAC8/ERBB4/GJA1	27
GO:0033157	regulation of intracellular protein transport	22/567	250/18670	8.46863e-06	0.000352507	0.000258813	PCM1/VAMP2/TPR/BCL2/NF1/GLI3/SORL1/RBM22/PIK3R1/RAC2/PDZK1/SUPT6H/PRKCD/LCP1/HCLS1/BNIP3L/YWHAE/PMAIP1/PAK1/ABLIM3/BMP4/APOD	22
GO:0048736	appendage development	18/567	179/18670	9.11018e-06	0.000372425	0.000273437	CREBBP/GLI3/NIPBL/LEF1/PRKAB1/TBX3/NR2F2/ATRX/BMPR2/WNT5A/RARA/BMPR1B/SEMA3C/BMP4/GJA1/ZBTB16/SOX9/TFAP2B	18
GO:0060173	limb development	18/567	179/18670	9.11018e-06	0.000372425	0.000273437	CREBBP/GLI3/NIPBL/LEF1/PRKAB1/TBX3/NR2F2/ATRX/BMPR2/WNT5A/RARA/BMPR1B/SEMA3C/BMP4/GJA1/ZBTB16/SOX9/TFAP2B	18
GO:0050769	positive regulation of neurogenesis	33/567	474/18670	9.17082e-06	0.000372425	0.000273437	IL6ST/DICER1/BCL2/MACF1/NUMB/MYB/CPEB3/P2RX4/NIN/GLI3/NIPBL/NEDD4L/PRKCH/CBFA2T2/FOXA1/TCF4/SEMA4D/NCOA1/LRP2/SPEN/SYT17/PLXNB1/SEMA5A/BMPR2/CXCL12/CX3CR1/WNT5A/RARA/IQGAP1/SEMA6A/PAK1/BMP4/KIT	33
GO:0010810	regulation of cell-substrate adhesion	20/567	215/18670	9.54624e-06	0.000384544	0.000282335	BCL2/MACF1/JAK2/NF1/RASA1/CD3E/CLASP2/PIK3R1/RAC2/ABI3BP/AGR2/EPB41L5/FBLN1/DLC1/JAG1/IQGAP1/NEDD9/COL16A1/CCL21/APOD	20
GO:0090218	positive regulation of lipid kinase activity	8/567	36/18670	9.83359e-06	0.00039288	0.000288456	CCL19/FLT3/VAV3/CD19/IRS1/PDGFRB/CCL21/KIT	8
GO:0045060	negative thymic T cell selection	5/567	11/18670	1.0076e-05	0.00039288	0.000288456	GLI3/CD3E/ZAP70/CD74/PTPRC	5
GO:0070106	interleukin-27-mediated signaling pathway	5/567	11/18670	1.0076e-05	0.00039288	0.000288456	IL6ST/JAK2/TYK2/STAT3/STAT1	5
GO:0070757	interleukin-35-mediated signaling pathway	5/567	11/18670	1.0076e-05	0.00039288	0.000288456	IL6ST/JAK2/STAT3/STAT4/STAT1	5
GO:0030521	androgen receptor signaling pathway	10/567	59/18670	1.01465e-05	0.00039288	0.000288456	PIAS1/NCOR1/NRIP1/DDX17/AR/NCOR2/UBE3A/NCOA1/SCGB2A2/DAB2	10
GO:0050673	epithelial cell proliferation	31/567	434/18670	1.03292e-05	0.000396878	0.000291391	IGFBP4/GATA3/PURA/ESR1/NF1/BTRC/AR/MST1/STAT3/HPN/TGFBR3/PGR/STAT6/NR2F2/SERPINB1/SEMA5A/GLUL/THBS4/BMPR2/CXCL12/WNT5A/CCL5/AGTR1/CCND1/BCL11B/EGR3/BMP4/STAT1/KIT/GJA1/SOX9	31
GO:0060560	developmental growth involved in morphogenesis	21/567	235/18670	1.06929e-05	0.000407719	0.00029935	LAMB2/MACF1/ESR1/CYFIP2/NIN/NEDD4L/EPB41L5/SEMA4D/SYT17/SEMA5A/BMPR2/CXCL12/WNT5A/IQGAP1/SEMA6A/SEMA3C/PAK1/BMP4/ALCAM/FLRT3/SOX9	21
GO:0002449	lymphocyte mediated immunity	27/567	352/18670	1.08305e-05	0.000409714	0.000300816	PARP3/PTPN6/GATA3/RASGRP1/INPP5D/CD8A/STAT6/CD1C/SH2D1A/SUPT6H/C5/IL18R1/WAS/PRKCD/C7/BTN3A2/JAG1/CD19/CR2/HLA-DQB1/TRPM4/CD74/BATF/HPX/SERPING1/PTPRC/C1S	27
GO:0016311	dephosphorylation	33/567	478/18670	1.09093e-05	0.000409714	0.000300816	PTP4A2/PTPN6/PTPRT/BCL2/JAK2/FBP1/IKBKB/INPP5D/BTRC/PPP2R2A/CRY2/GNAI2/CILP/PTPRE/IGBP1/UBASH3A/SEMA4D/PTPN7/SYTL2/EPHX2/PPP1R3C/PRKCD/DLC1/INPP4B/SSH3/CDK5RAP3/IQGAP1/LCK/YWHAE/PDGFRB/PTPN13/PTPRC/DUSP4	33
GO:0030850	prostate gland development	9/567	48/18670	1.20161e-05	0.000438957	0.000322285	ESR1/GLI3/FOXA1/AR/UBE3A/WNT5A/RARA/BMP4/SOX9	9
GO:1903727	positive regulation of phospholipid metabolic process	9/567	48/18670	1.20161e-05	0.000438957	0.000322285	CCL19/FLT3/VAV3/PRKCD/CD19/IRS1/PDGFRB/CCL21/KIT	9
GO:0002690	positive regulation of leukocyte chemotaxis	12/567	87/18670	1.22038e-05	0.000438957	0.000322285	CCL19/CXCL14/RAC2/STK39/F7/THBS4/CXCL12/WNT5A/CCL5/CD74/CCL21/CXCL13	12
GO:0048846	axon extension involved in axon guidance	8/567	37/18670	1.22152e-05	0.000438957	0.000322285	SEMA4D/SEMA5A/BMPR2/CXCL12/WNT5A/SEMA6A/SEMA3C/ALCAM	8
GO:1902284	neuron projection extension involved in neuron projection guidance	8/567	37/18670	1.22152e-05	0.000438957	0.000322285	SEMA4D/SEMA5A/BMPR2/CXCL12/WNT5A/SEMA6A/SEMA3C/ALCAM	8
GO:2000403	positive regulation of lymphocyte migration	8/567	37/18670	1.22152e-05	0.000438957	0.000322285	PYCARD/CXCL14/STK39/CXCL12/WNT5A/CCL5/CCL21/CXCL13	8
GO:0007596	blood coagulation	26/567	336/18670	1.34891e-05	0.000481272	0.000353354	PTPN6/DGKA/GATA3/P2RX4/JAK2/F2RL2/ABAT/PRKCH/ITPR2/PIK3R1/VAV3/ADRA2A/PLAT/VWF/F7/WAS/FBLN1/PRKCD/LCK/IRF1/ENPP4/LCP2/SERPING1/COL3A1/COL1A2/SERPINA1	26
GO:0002697	regulation of immune effector process	32/567	462/18670	1.38785e-05	0.000491654	0.000360976	PARP3/PTPN6/GATA3/TRIM44/MYB/TGFB3/PYCARD/CCL19/RASGRP1/RAC2/TRIM38/STAT6/CD1C/SH2D1A/SUPT6H/C5/IL18R1/WAS/APOBEC3G/C7/CD19/CR2/WNT5A/RARA/TRPM4/CD74/BIRC3/HPX/SERPING1/PTPRC/STAT1/C1S	32
GO:0007015	actin filament organization	29/567	400/18670	1.50537e-05	0.000529529	0.000388784	SPTAN1/BCL2/ADD1/VILL/TGFB3/PYCARD/JAK2/GAS7/RASA1/CLASP2/PIK3R1/RAC2/ARHGAP25/FCHSD2/WAS/CAP2/PRKCD/DLC1/LCP1/SEMA5A/CXCL12/HCLS1/NEDD9/ELN/CCL21/ENAH/RHOB/PAK1/MYBPC1	29
GO:0001952	regulation of cell-matrix adhesion	14/567	119/18670	1.53017e-05	0.000534489	0.000392426	BCL2/MACF1/NF1/RASA1/CD3E/CLASP2/PIK3R1/EPB41L5/DLC1/JAG1/IQGAP1/COL16A1/CCL21/APOD	14
GO:0046427	positive regulation of receptor signaling pathway via JAK-STAT	12/567	89/18670	1.54578e-05	0.000536193	0.000393677	IL6ST/JAK2/FLT3/STAT3/HCLS1/IL10RA/CCL5/CSF1R/PRLR/HPX/ERBB4/KIT	12
GO:0033598	mammary gland epithelial cell proliferation	7/567	28/18670	1.5599e-05	0.000537359	0.000394533	GATA3/ESR1/BTRC/MST1/STAT6/WNT5A/CCND1	7
GO:0045619	regulation of lymphocyte differentiation	17/567	169/18670	1.60017e-05	0.000547455	0.000401946	PTPN6/GATA3/MYB/CCL19/GLI3/RASGRP1/RUNX1/INPP5D/ZAP70/CD2/RARA/IRF1/CD74/EGR3/BMP4/PTPRC/ZBTB16	17
GO:0043383	negative T cell selection	5/567	12/18670	1.68415e-05	0.000572269	0.000420164	GLI3/CD3E/ZAP70/CD74/PTPRC	5
GO:1903532	positive regulation of secretion by cell	29/567	403/18670	1.73093e-05	0.000581141	0.000426678	GATA3/MYB/P2RX4/TGFB3/PYCARD/PDCD6IP/JAK2/CCL19/RASGRP1/ABAT/CLASP2/GOLPH3L/CD2/GLUD1/C5/CACNA1D/RAB27B/GLUL/CXCL12/CADPS2/WNT5A/TRPM4/SLC6A4/CSF1R/MYRIP/PLA2G10/GJA1/VTCN1/GRP	29
GO:0001656	metanephros development	12/567	90/18670	1.73517e-05	0.000581141	0.000426678	LAMB2/GATA3/BCL2/NF1/GLI3/NIPBL/PDGFRB/BMP4/STAT1/CITED1/SOX9/TFAP2B	12
GO:0007599	hemostasis	26/567	341/18670	1.74517e-05	0.000581141	0.000426678	PTPN6/DGKA/GATA3/P2RX4/JAK2/F2RL2/ABAT/PRKCH/ITPR2/PIK3R1/VAV3/ADRA2A/PLAT/VWF/F7/WAS/FBLN1/PRKCD/LCK/IRF1/ENPP4/LCP2/SERPING1/COL3A1/COL1A2/SERPINA1	26
GO:0007409	axonogenesis	32/567	468/18670	1.79483e-05	0.000593719	0.000435913	KIF13B/SPTAN1/LAMB2/GATA3/BCL2/GFRA1/MACF1/NUMB/CYFIP2/NIN/GLI3/PIK3R1/RAC2/SEMA4D/RPS6KA5/FLRT2/LAMA2/PLXNB1/SEMA5A/BMPR2/CXCL12/WNT5A/BMPR1B/CSF1R/SEMA6A/SEMA3C/PLA2G10/BCL11B/ENAH/PAK1/ALCAM/FLRT3	32
GO:0050817	coagulation	26/567	342/18670	1.83608e-05	0.000603371	0.000442999	PTPN6/DGKA/GATA3/P2RX4/JAK2/F2RL2/ABAT/PRKCH/ITPR2/PIK3R1/VAV3/ADRA2A/PLAT/VWF/F7/WAS/FBLN1/PRKCD/LCK/IRF1/ENPP4/LCP2/SERPING1/COL3A1/COL1A2/SERPINA1	26
GO:1990845	adaptive thermogenesis	16/567	154/18670	1.88895e-05	0.000616687	0.000452777	OGT/JAK2/SORL1/IGF1R/PER2/PRKAB1/STAT6/IL18R1/PLCL2/ZNF423/ESRRG/PRLR/GATM/PLAC8/NOVA1/GJA1	16
GO:0007265	Ras protein signal transduction	31/567	448/18670	1.92463e-05	0.000624254	0.000458332	ARHGEF3/NISCH/PSD3/OGT/JAK2/F2RL2/ARHGDIB/FBP1/NF1/RASGRP1/RASA1/PSD4/SETDB1/VAV3/ADRA2A/RAC2/IQSEC1/GPR18/WAS/DLC1/RAB27B/ARHGEF6/PLK2/AGTR1/PDGFRB/RAB17/RAB26/RHOB/RAB31/COL3A1/COL1A2	31
GO:0060333	interferon-gamma-mediated signaling pathway	12/567	91/18670	1.94448e-05	0.000626623	0.000460072	PIAS1/JAK2/TRIM38/CD44/PRKCD/HLA-DQB1/IRF1/IRF8/GBP2/HPX/HLA-DQA1/STAT1	12
GO:0002286	T cell activation involved in immune response	13/567	106/18670	1.95763e-05	0.000626818	0.000460215	GATA3/MYB/CCL19/RORC/LEF1/STAT3/STAT6/CD1C/LY9/IL18R1/LCP1/RARA/BATF	13
GO:0055074	calcium ion homeostasis	32/567	471/18670	2.03677e-05	0.000648005	0.00047577	PTPN6/BCL2/ESR1/P2RX4/STC2/JAK2/F2RL2/CCL19/ATP7B/ITPR2/CXCR3/GPR18/CACNA1D/EPHX2/ATP1B1/PDE6B/CXCL12/CD19/CX3CR1/WNT5A/LCK/TRPM4/CCL5/YWHAE/RAMP3/AGTR1/CCL21/CXCL9/PTPRC/CXCL13/GJA1/TFAP2B	32
GO:0002320	lymphoid progenitor cell differentiation	6/567	20/18670	2.0591e-05	0.000649265	0.000476696	GATA3/BCL2/FLT3/BATF/BMP4/KIT	6
GO:1903829	positive regulation of cellular protein localization	25/567	324/18670	2.06673e-05	0.000649265	0.000476696	PCM1/VAMP2/TPR/BCL2/GLI3/NIPBL/SORL1/PRKCH/RBM22/PIK3R1/RAC2/PDZK1/AGR2/AP2B1/PRKCD/HCLS1/NUMA1/CDK5RAP3/IQGAP1/YWHAE/RAMP3/PMAIP1/PAK1/ABLIM3/ERBB4	25
GO:0043550	regulation of lipid kinase activity	10/567	64/18670	2.13501e-05	0.000663089	0.000486845	CISH/CCL19/PIK3R1/FLT3/VAV3/CD19/IRS1/PDGFRB/CCL21/KIT	10
GO:0001659	temperature homeostasis	17/567	173/18670	2.17235e-05	0.000663089	0.000486845	OGT/JAK2/ABAT/IGF1R/PER2/STAT3/PRKAB1/STAT6/IL18R1/PLCL2/ZNF423/ESRRG/PRLR/GATM/PLAC8/NOVA1/GJA1	17
GO:0035710	CD4-positive, alpha-beta T cell activation	12/567	92/18670	2.17546e-05	0.000663089	0.000486845	GATA3/MYB/CCL19/RUNX1/RORC/LEF1/STAT3/STAT6/LY9/IL18R1/RARA/BATF	12
GO:1904894	positive regulation of receptor signaling pathway via STAT	12/567	92/18670	2.17546e-05	0.000663089	0.000486845	IL6ST/JAK2/FLT3/STAT3/HCLS1/IL10RA/CCL5/CSF1R/PRLR/HPX/ERBB4/KIT	12
GO:0045580	regulation of T cell differentiation	15/567	139/18670	2.18217e-05	0.000663089	0.000486845	GATA3/MYB/CCL19/GLI3/RASGRP1/RUNX1/ZAP70/CD2/RARA/IRF1/CD74/EGR3/BMP4/PTPRC/ZBTB16	15
GO:0045088	regulation of innate immune response	24/567	305/18670	2.19038e-05	0.000663089	0.000486845	PTPN6/NFKB1/MUC1/CREBBP/PIAS1/PYCARD/JAK2/RASGRP1/IKBKB/BTRC/PSME1/ADAR/RPS6KA5/SH2D1A/ICAM3/PRKCD/WNT5A/IRF1/CCL5/BIRC3/HPX/SERPING1/PAK1/STAT1	24
GO:0030856	regulation of epithelial cell differentiation	16/567	156/18670	2.21973e-05	0.000667924	0.000490395	GATA3/ADD1/IKBKB/RUNX1/PRKCH/FRZB/TBX3/JAG1/NUMA1/BTG1/CCND1/CLDN5/BMP4/STAT1/CITED1/SOX9	16
GO:0030198	extracellular matrix organization	27/567	368/18670	2.39342e-05	0.000715875	0.000525601	CST3/LAMB2/COL4A5/NF1/CLASP2/FMOD/ABI3BP/HPN/VWF/CD44/FLRT2/ICAM3/LAMA3/COL14A1/FBLN1/LAMA2/LCP1/ELN/COL6A3/COL16A1/COL9A2/MATN3/COL6A1/COL15A1/COL3A1/SOX9/COL1A2	27
GO:0072678	T cell migration	10/567	65/18670	2.45551e-05	0.000730075	0.000536027	PYCARD/ZAP70/STK39/CXCR3/CXCL12/WNT5A/CCL5/CCL21/CXCL13/APOD	10
GO:0043062	extracellular structure organization	27/567	369/18670	2.51032e-05	0.000741956	0.00054475	CST3/LAMB2/COL4A5/NF1/CLASP2/FMOD/ABI3BP/HPN/VWF/CD44/FLRT2/ICAM3/LAMA3/COL14A1/FBLN1/LAMA2/LCP1/ELN/COL6A3/COL16A1/COL9A2/MATN3/COL6A1/COL15A1/COL3A1/SOX9/COL1A2	27
GO:0002791	regulation of peptide secretion	33/567	500/18670	2.71472e-05	0.000797649	0.00058564	GATA3/TGFB3/PYCARD/JAK2/CCL19/RASGRP1/ABAT/ITPR2/ADRA2A/PER2/GOLPH3L/CD2/GLUD1/C5/CACNA1D/SERPINB1/GLUL/TLR5/RHBDF1/IRS1/WNT5A/TRPM4/ABCC8/CCL5/CACNA2D2/CSF1R/CD74/MYRIP/BANK1/GJA1/VTCN1/GRP/TFAP2B	33
GO:0140131	positive regulation of lymphocyte chemotaxis	6/567	21/18670	2.80901e-05	0.000817895	0.000600505	CXCL14/STK39/WNT5A/CCL5/CCL21/CXCL13	6
GO:0046626	regulation of insulin receptor signaling pathway	10/567	66/18670	2.81637e-05	0.000817895	0.000600505	OGT/CISH/SORL1/PIK3R1/GNAI2/PTPRE/PRKCD/IRS1/OSBPL8/PAK1	10
GO:0045637	regulation of myeloid cell differentiation	21/567	251/18670	2.88671e-05	0.000833474	0.000611943	CREBBP/NF1/RUNX1/INPP5D/STAT5B/TNRC6B/PIK3R1/LEF1/RASSF2/STAT3/NFKBIA/JAG1/EVI2B/HCLS1/RARA/CD74/CSF3R/KLF13/STAT1/ZBTB16/FOS	21
GO:0006874	cellular calcium ion homeostasis	31/567	458/18670	2.94268e-05	0.000844752	0.000620224	PTPN6/BCL2/ESR1/P2RX4/STC2/JAK2/F2RL2/CCL19/ATP7B/ITPR2/CXCR3/GPR18/CACNA1D/EPHX2/ATP1B1/PDE6B/CXCL12/CD19/CX3CR1/WNT5A/LCK/TRPM4/CCL5/YWHAE/RAMP3/AGTR1/CCL21/CXCL9/PTPRC/CXCL13/GJA1	31
GO:0002819	regulation of adaptive immune response	16/567	160/18670	3.03889e-05	0.000862593	0.000633322	IL6ST/PARP3/PTPN6/GATA3/PYCARD/CCL19/STAT6/CD1C/SUPT6H/IL18R1/WAS/IRF1/CD48/TRPM4/HPX/PTPRC	16
GO:0106106	cold-induced thermogenesis	15/567	143/18670	3.05664e-05	0.000862593	0.000633322	OGT/JAK2/IGF1R/PER2/PRKAB1/STAT6/IL18R1/PLCL2/ZNF423/ESRRG/PRLR/GATM/PLAC8/NOVA1/GJA1	15
GO:0120161	regulation of cold-induced thermogenesis	15/567	143/18670	3.05664e-05	0.000862593	0.000633322	OGT/JAK2/IGF1R/PER2/PRKAB1/STAT6/IL18R1/PLCL2/ZNF423/ESRRG/PRLR/GATM/PLAC8/NOVA1/GJA1	15
GO:2000406	positive regulation of T cell migration	7/567	31/18670	3.20083e-05	0.000898211	0.000659474	PYCARD/STK39/CXCL12/WNT5A/CCL5/CCL21/CXCL13	7
GO:2000027	regulation of animal organ morphogenesis	21/567	253/18670	3.24625e-05	0.000905867	0.000665094	GATA3/BCL2/ESR1/BTBD7/CHAD/PSME1/AR/HPN/BCOR/AP2B1/JAG1/CELSR2/BMPR2/WNT5A/DAB2/SEMA3C/BMP4/ASPN/STAT1/CITED1/SOX9	21
GO:0030336	negative regulation of cell migration	25/567	334/18670	3.42985e-05	0.000951782	0.000698806	NISCH/PTPRT/BCL2/ARHGDIB/NF1/DACH1/CLASP2/STAT3/GPR18/C5/NR2F2/DLC1/JAG1/CXCL12/CX3CR1/OSBPL8/CD74/CCL21/IFITM1/RHOB/COL3A1/NAV3/ERBB4/CXCL13/APOD	25
GO:0002687	positive regulation of leukocyte migration	14/567	128/18670	3.50613e-05	0.000967575	0.000710401	P2RX4/PYCARD/CCL19/CXCL14/RAC2/STK39/F7/THBS4/CXCL12/WNT5A/CCL5/CD74/CCL21/CXCL13	14
GO:0001503	ossification	28/567	398/18670	3.61158e-05	0.000991201	0.000727748	IL6ST/BCL2/HSD17B4/TGFB3/NF1/GLI3/NIPBL/LEF1/ADAR/SEMA4D/RASSF2/BCOR/PLXNB1/JAG1/BMPR2/WNT5A/TRPM4/BMPR1B/IFITM1/COL6A1/BMP4/ASPN/CITED1/OMD/GJA1/ZBTB16/SOX9/COL1A2	28
GO:0060348	bone development	19/567	217/18670	3.69487e-05	0.00100852	0.000740461	PTPN6/TGFB3/GLI3/CHAD/TRIM45/SEMA4D/COL14A1/PLXNB1/BMPR2/RARA/BMPR1B/COL6A3/MATN3/COL6A1/BMP4/PTPRC/KIT/GJA1/SOX9	19
GO:0072643	interferon-gamma secretion	6/567	22/18670	3.76366e-05	0.00101286	0.000743648	GATA3/RASGRP1/CD2/BTN3A1/BTN3A2/VTCN1	6
GO:0001819	positive regulation of cytokine production	31/567	464/18670	3.76767e-05	0.00101286	0.000743648	IL6ST/GATA3/NFKB1/CREBBP/MYB/PYCARD/JAK2/CCL19/RASGRP1/RUNX1/CD3E/CD6/PIK3R1/ADRA2A/CD2/STAT3/STAT6/C5/LY9/IL18R1/TLR5/WNT5A/RARA/IRF1/IRF8/CSF1R/CD74/BIRC3/PTPRC/STAT1/VTCN1	31
GO:0042306	regulation of protein import into nucleus	9/567	55/18670	3.7716e-05	0.00101286	0.000743648	TPR/NF1/GLI3/RBM22/PIK3R1/PRKCD/HCLS1/BMP4/APOD	9
GO:0032609	interferon-gamma production	13/567	113/18670	3.89262e-05	0.00103675	0.000761189	GATA3/PYCARD/RASGRP1/CD3E/ITK/CD2/BTN3A1/IL18R1/BTN3A2/WNT5A/RARA/IRF8/VTCN1	13
GO:0035264	multicellular organism growth	15/567	146/18670	3.90208e-05	0.00103675	0.000761189	BCL2/ADD1/STC2/NIPBL/RBBP6/STAT5B/AR/KLF2/STAT3/NPY1R/ATRX/GAMT/RARA/CACNA2D2/PLAC8	15
GO:0048841	regulation of axon extension involved in axon guidance	7/567	32/18670	3.99054e-05	0.00105464	0.000774327	SEMA4D/SEMA5A/BMPR2/CXCL12/WNT5A/SEMA6A/SEMA3C	7
GO:0060397	growth hormone receptor signaling pathway via JAK-STAT	5/567	14/18670	4.04731e-05	0.00106402	0.000781209	JAK2/STAT5B/STAT3/STAT6/PRLR	5
GO:0002262	myeloid cell homeostasis	15/567	147/18670	4.22636e-05	0.00110527	0.000811499	GATA3/ADD1/JAK2/INPP5D/STAT5B/ADAR/ARID4A/KLF2/STAT3/TGFBR3/HCLS1/KLF13/BMP4/STAT1/KIT	15
GO:2000404	regulation of T cell migration	8/567	44/18670	4.65132e-05	0.00121007	0.000888443	PYCARD/STK39/CXCL12/WNT5A/CCL5/CCL21/CXCL13/APOD	8
GO:0002244	hematopoietic progenitor cell differentiation	16/567	166/18670	4.76937e-05	0.00123435	0.000906272	PTPN6/GATA3/BCL2/MYB/RUNX1/PSME1/FLT3/ADAR/MEOX1/EEF2/CSF1R/BATF/PDGFRB/BMP4/PTPRC/KIT	16
GO:0060603	mammary gland duct morphogenesis	7/567	33/18670	4.93329e-05	0.00126368	0.000927805	ESR1/BTRC/AR/PGR/TBX3/WNT5A/CSF1R	7
GO:0061036	positive regulation of cartilage development	7/567	33/18670	4.93329e-05	0.00126368	0.000927805	GLI3/BMPR2/WNT5A/BMPR1B/BMP4/ZBTB16/SOX9	7
GO:0050708	regulation of protein secretion	31/567	472/18670	5.19349e-05	0.00132355	0.000971758	GATA3/TGFB3/PYCARD/JAK2/CCL19/RASGRP1/ABAT/ITPR2/ADRA2A/PER2/GOLPH3L/CD2/GLUD1/C5/CACNA1D/SERPINB1/GLUL/TLR5/RHBDF1/IRS1/WNT5A/TRPM4/ABCC8/CCL5/CACNA2D2/CSF1R/MYRIP/BANK1/GJA1/VTCN1/TFAP2B	31
GO:0042531	positive regulation of tyrosine phosphorylation of STAT protein	10/567	71/18670	5.38087e-05	0.00136434	0.00100171	IL6ST/JAK2/FLT3/STAT3/HCLS1/CCL5/CSF1R/HPX/ERBB4/KIT	10
GO:0034504	protein localization to nucleus	21/567	262/18670	5.41139e-05	0.00136515	0.0010023	TOR1AIP1/TPR/TXNIP/HHEX/NF1/GLI3/RBM22/PIK3R1/STAT3/NFKBIA/PRKCD/GLUL/HCLS1/CDK5RAP3/OSBPL8/YWHAE/GBP2/BMP4/APOD/ZBTB16/SOX9	21
GO:1990138	neuron projection extension	16/567	168/18670	5.51397e-05	0.00138403	0.00101617	LAMB2/MACF1/CYFIP2/NEDD4L/SEMA4D/SYT17/SEMA5A/BMPR2/CXCL12/WNT5A/IQGAP1/SEMA6A/SEMA3C/PAK1/ALCAM/FLRT3	16
GO:1904589	regulation of protein import	9/567	58/18670	5.82612e-05	0.00145507	0.00106833	TPR/NF1/GLI3/RBM22/PIK3R1/PRKCD/HCLS1/BMP4/APOD	9
GO:0019216	regulation of lipid metabolic process	28/567	410/18670	6.08239e-05	0.00151152	0.00110977	NFKB1/CREBBP/CISH/NCOR1/CCL19/SEC14L2/SORL1/PIK3R1/FLT3/VAV3/RORC/ADRA2A/NCOR2/NCOA1/EPHX2/PRKCD/CD19/IRS1/ELOVL5/HMGCS2/CD74/AGTR1/PDGFRB/CCL21/GSTZ1/BCL11B/KIT/APOD	28
GO:0060396	growth hormone receptor signaling pathway	6/567	24/18670	6.44697e-05	0.00159419	0.00117047	JAK2/STAT5B/PIK3R1/STAT3/STAT6/PRLR	6
GO:0030168	platelet activation	15/567	153/18670	6.71717e-05	0.00165282	0.00121351	PTPN6/DGKA/F2RL2/ABAT/PRKCH/ITPR2/PIK3R1/VAV3/ADRA2A/VWF/PRKCD/LCK/LCP2/COL3A1/COL1A2	15
GO:1903725	regulation of phospholipid metabolic process	11/567	88/18670	7.09262e-05	0.00173665	0.00127506	CISH/CCL19/PIK3R1/FLT3/VAV3/PRKCD/CD19/IRS1/PDGFRB/CCL21/KIT	11
GO:2000107	negative regulation of leukocyte apoptotic process	8/567	47/18670	7.61836e-05	0.00185628	0.00136289	CCL19/CXCL12/HCLS1/CCL5/CD74/CCL21/PIP/BMP4	8
GO:1900076	regulation of cellular response to insulin stimulus	10/567	74/18670	7.71737e-05	0.00187037	0.00137324	OGT/CISH/SORL1/PIK3R1/GNAI2/PTPRE/PRKCD/IRS1/OSBPL8/PAK1	10
GO:0097529	myeloid leukocyte migration	18/567	210/18670	7.75107e-05	0.00187037	0.00137324	P2RX4/CCL19/VAV3/RAC2/MST1/C5/MTUS1/CCL22/THBS4/CXCL12/CX3CR1/CCL5/CD74/CCL21/CSF3R/CXCL9/CXCL13/KIT	18
GO:1901888	regulation of cell junction assembly	17/567	192/18670	8.16048e-05	0.0019569	0.00143677	MACF1/IKBKB/RUNX1/CLASP2/PRKCH/EPB41L5/SEMA4D/FLRT2/DLC1/WNT5A/IQGAP1/COL16A1/RAB17/CLDN5/GJA1/APOD/FLRT3	17
GO:0016049	cell growth	31/567	484/18670	8.25785e-05	0.0019569	0.00143677	IGFBP4/LAMB2/BCL2/MACF1/SMARCA2/CYFIP2/CISH/NIN/FBP1/NEDD4L/LEF1/EPB41L5/SEMA4D/HPN/FRZB/USP47/SYT17/SEMA5A/BMPR2/CXCL12/WNT5A/IQGAP1/AGTR1/BTG1/SEMA6A/SEMA3C/PAK1/ALCAM/GJA1/FLRT3/SOX9	31
GO:0060444	branching involved in mammary gland duct morphogenesis	6/567	25/18670	8.26639e-05	0.0019569	0.00143677	ESR1/BTRC/AR/PGR/TBX3/WNT5A	6
GO:0071378	cellular response to growth hormone stimulus	6/567	25/18670	8.26639e-05	0.0019569	0.00143677	JAK2/STAT5B/PIK3R1/STAT3/STAT6/PRLR	6
GO:0010820	positive regulation of T cell chemotaxis	5/567	16/18670	8.39581e-05	0.00197816	0.00145238	STK39/WNT5A/CCL5/CCL21/CXCL13	5
GO:0045778	positive regulation of ossification	11/567	90/18670	8.72976e-05	0.00204719	0.00150306	IL6ST/TGFB3/GLI3/NIPBL/JAG1/BMPR2/WNT5A/BMPR1B/IFITM1/BMP4/ZBTB16	11
GO:0050796	regulation of insulin secretion	16/567	176/18670	9.61555e-05	0.00223394	0.00164018	JAK2/ABAT/ITPR2/ADRA2A/PER2/GLUD1/CACNA1D/GLUL/IRS1/TRPM4/ABCC8/CCL5/CACNA2D2/MYRIP/GJA1/TFAP2B	16
GO:0090316	positive regulation of intracellular protein transport	16/567	176/18670	9.61555e-05	0.00223394	0.00164018	PCM1/VAMP2/TPR/BCL2/GLI3/SORL1/RBM22/PIK3R1/RAC2/PDZK1/PRKCD/HCLS1/YWHAE/PMAIP1/PAK1/ABLIM3	16
GO:0045639	positive regulation of myeloid cell differentiation	11/567	91/18670	9.66273e-05	0.00223451	0.00164059	RUNX1/INPP5D/STAT5B/LEF1/STAT3/JAG1/EVI2B/HCLS1/CD74/STAT1/FOS	11
GO:0002831	regulation of response to biotic stimulus	27/567	400/18670	9.96399e-05	0.00228356	0.0016766	PTPN6/NFKB1/TRIM44/MUC1/CREBBP/PIAS1/PYCARD/JAK2/RASGRP1/IKBKB/BTRC/PSME1/ADAR/TRIM38/RPS6KA5/SH2D1A/ICAM3/APOBEC3G/PRKCD/WNT5A/IRF1/CCL5/BIRC3/HPX/SERPING1/PAK1/STAT1	27
GO:0046635	positive regulation of alpha-beta T cell activation	9/567	62/18670	9.96627e-05	0.00228356	0.0016766	MYB/CCL19/GLI3/RUNX1/CD3E/ZAP70/RARA/PTPRC/ZBTB16	9
GO:0051480	regulation of cytosolic calcium ion concentration	25/567	357/18670	0.000100611	0.00229475	0.00168483	PTPN6/BCL2/ESR1/P2RX4/JAK2/F2RL2/CCL19/ITPR2/CXCR3/GPR18/CACNA1D/PDE6B/CD19/CX3CR1/WNT5A/LCK/TRPM4/YWHAE/RAMP3/AGTR1/CCL21/CXCL9/PTPRC/CXCL13/GJA1	25
GO:0001959	regulation of cytokine-mediated signaling pathway	16/567	177/18670	0.00010281	0.00233425	0.00171382	PTPN6/TRIM44/ELF1/PIAS1/PYCARD/JAK2/IKBKB/RUNX1/ADAR/WNT5A/CCL5/CD74/BIRC3/HPX/PTPRC/STAT1	16
GO:0060740	prostate gland epithelium morphogenesis	6/567	26/18670	0.000104722	0.00236344	0.00173525	ESR1/FOXA1/AR/WNT5A/BMP4/SOX9	6
GO:0001763	morphogenesis of a branching structure	17/567	196/18670	0.000105228	0.00236344	0.00173525	BCL2/ESR1/BTBD7/GLI3/RERE/BTRC/LEF1/FOXA1/AR/PGR/TBX3/WNT5A/SEMA3C/PAK1/BMP4/CITED1/SOX9	17
GO:0048511	rhythmic process	22/567	295/18670	0.000105515	0.00236344	0.00173525	OGT/CREBBP/ESR1/TGFB3/NCOR1/BTRC/CRY2/NRIP1/RORC/PER2/SIAH2/NCOR2/PER3/UBE3A/PGR/F7/NCOA1/PTGDS/IMPDH2/SLC6A4/BMPR1B/EGR3	22
GO:0043405	regulation of MAP kinase activity	24/567	337/18670	0.000106546	0.00237588	0.00174439	PTPN6/TGFB3/JAK2/NF1/CCL19/RASGRP1/SORL1/FLT3/IGF1R/ADRA2A/MAP4K1/STK39/C5/PRKCD/WNT5A/CDK5RAP3/IQGAP1/CD74/PDGFRB/PAK1/BMP4/PTPRC/KIT/DUSP4	24
GO:0046777	protein autophosphorylation	19/567	235/18670	0.000108086	0.0023995	0.00176173	JAK2/ZAP70/FLT3/ITK/IGF1R/MAP4K1/CLK4/STK39/RASSF2/IQGAP1/LCK/CSF1R/PDGFRB/CLK1/MAK/PAK1/PTPRC/ERBB4/KIT	19
GO:0052548	regulation of endopeptidase activity	28/567	425/18670	0.000112592	0.00248849	0.00182707	CST3/CYFIP2/PYCARD/JAK2/SORL1/PSME1/ARL6IP5/LEF1/IGBP1/SIAH2/STAT3/CD44/USP47/C5/DLC1/SERPINB1/TNFSF10/WFDC2/LCK/CST7/YWHAE/COL6A3/BIRC3/PMAIP1/SERPING1/CST1/SERPINA1/TFAP2B	28
GO:2000401	regulation of lymphocyte migration	9/567	63/18670	0.000113188	0.00249063	0.00182864	PYCARD/CXCL14/STK39/CXCL12/WNT5A/CCL5/CCL21/CXCL13/APOD	9
GO:0072503	cellular divalent inorganic cation homeostasis	31/567	493/18670	0.00011538	0.00252774	0.00185589	PTPN6/BCL2/ESR1/P2RX4/STC2/JAK2/F2RL2/CCL19/ATP7B/ITPR2/CXCR3/GPR18/CACNA1D/EPHX2/ATP1B1/PDE6B/CXCL12/CD19/CX3CR1/WNT5A/LCK/TRPM4/CCL5/YWHAE/RAMP3/AGTR1/CCL21/CXCL9/PTPRC/CXCL13/GJA1	31
GO:0010819	regulation of T cell chemotaxis	5/567	17/18670	0.00011598	0.00252977	0.00185738	STK39/WNT5A/CCL5/CCL21/CXCL13	5
GO:0046634	regulation of alpha-beta T cell activation	11/567	93/18670	0.000117862	0.00255965	0.00187931	GATA3/MYB/CCL19/GLI3/RUNX1/CD3E/ZAP70/RARA/IRF1/PTPRC/ZBTB16	11
GO:0048863	stem cell differentiation	20/567	257/18670	0.000121257	0.00262199	0.00192508	GATA3/MYB/ESR1/RUNX1/PSME1/FOXA1/SEMA4D/STAT3/FRZB/MEOX1/SEMA5A/JAG1/BATF/SEMA6A/SEMA3C/BMP4/PTPRC/ERBB4/KIT/SOX9	20
GO:0060416	response to growth hormone	7/567	38/18670	0.000127781	0.00274867	0.00201809	JAK2/STAT5B/PIK3R1/STAT3/F7/STAT6/PRLR	7
GO:0048247	lymphocyte chemotaxis	9/567	64/18670	0.000128216	0.00274867	0.00201809	CCL19/CXCL14/STK39/CXCR3/CCL22/WNT5A/CCL5/CCL21/CXCL13	9
GO:1901623	regulation of lymphocyte chemotaxis	6/567	27/18670	0.000131211	0.00280085	0.00205641	CXCL14/STK39/WNT5A/CCL5/CCL21/CXCL13	6
GO:0003007	heart morphogenesis	20/567	259/18670	0.000134676	0.0028467	0.00209007	GATA3/NIPBL/TGFBR3/NPY1R/LRP2/FLRT2/TBX3/DLC1/JAG1/BMPR2/WNT5A/RARA/ELN/SEMA3C/CLDN5/DSP/BMP4/MYBPC1/GJA1/SOX9	20
GO:0006470	protein dephosphorylation	23/567	321/18670	0.000134797	0.0028467	0.00209007	PTP4A2/PTPN6/PTPRT/BCL2/JAK2/IKBKB/BTRC/PPP2R2A/CRY2/GNAI2/PTPRE/IGBP1/PTPN7/PPP1R3C/PRKCD/DLC1/SSH3/LCK/YWHAE/PDGFRB/PTPN13/PTPRC/DUSP4	23
GO:0052547	regulation of peptidase activity	29/567	452/18670	0.000135069	0.0028467	0.00209007	CST3/CYFIP2/PYCARD/JAK2/SORL1/PSME1/ARL6IP5/LEF1/IGBP1/SIAH2/STAT3/CD44/USP47/C5/FBLN1/DLC1/SERPINB1/TNFSF10/WFDC2/LCK/CST7/YWHAE/COL6A3/BIRC3/PMAIP1/SERPING1/CST1/SERPINA1/TFAP2B	29
GO:0061138	morphogenesis of a branching epithelium	16/567	182/18670	0.000142487	0.00297511	0.00218435	BCL2/ESR1/BTBD7/GLI3/BTRC/LEF1/FOXA1/AR/PGR/TBX3/WNT5A/SEMA3C/PAK1/BMP4/CITED1/SOX9	16
GO:0042100	B cell proliferation	11/567	95/18670	0.000142948	0.00297511	0.00218435	BCL2/INPP5D/VAV3/LEF1/CD79A/PLCL2/PRKCD/CD19/CR2/CD74/PTPRC	11
GO:0044070	regulation of anion transport	11/567	95/18670	0.000142948	0.00297511	0.00218435	P2RX4/NCOR1/ABAT/ABCB1/CRY2/ARL6IP5/PER2/PDZK1/STK39/PRKCD/PLA2G10	11
GO:0050854	regulation of antigen receptor-mediated signaling pathway	9/567	65/18670	0.000144876	0.00300272	0.00220462	PTPN6/ELF1/RUNX1/PRKCH/UBASH3A/PLCL2/CD19/LCK/PTPRC	9
GO:0010721	negative regulation of cell development	24/567	344/18670	0.000145784	0.00300905	0.00220927	PCM1/DICER1/BCL2/NF1/GLI3/SORL1/CBFA2T2/CDK5RAP2/SEMA4D/STAT3/UBE3A/FRZB/FBLN1/SEMA5A/JAG1/PLK2/WNT5A/SLC6A4/SEMA6A/SEMA3C/PAK1/COL3A1/ERBB4/SOX9	24
GO:1904892	regulation of receptor signaling pathway via STAT	14/567	146/18670	0.000147648	0.00303498	0.0022283	IL6ST/PTPRT/JAK2/FLT3/STAT3/HCLS1/IL10RA/CCL5/CSF1R/PRLR/HPX/PTPRC/ERBB4/KIT	14
GO:0072015	glomerular visceral epithelial cell development	4/567	10/18670	0.000152764	0.00312729	0.00229608	LAMB2/JAG1/IQGAP1/BMP4	4
GO:0050853	B cell receptor signaling pathway	13/567	129/18670	0.000153559	0.00313071	0.0022986	PTPN6/BCL2/ELF1/RUNX1/PRKCH/ITK/VAV3/CD79A/CD79B/PLCL2/CD19/LCK/PTPRC	13
GO:0070663	regulation of leukocyte proliferation	18/567	222/18670	0.000157096	0.00318981	0.00234198	IL6ST/PTPN6/BCL2/HHEX/PYCARD/CCL19/INPP5D/CD3E/CD6/ZAP70/VAV3/RAC2/IRF1/CCL5/CD74/BMP4/PTPRC/VTCN1	18
GO:0010818	T cell chemotaxis	6/567	28/18670	0.000162741	0.00327592	0.0024052	STK39/CXCR3/WNT5A/CCL5/CCL21/CXCL13	6
GO:0060512	prostate gland morphogenesis	6/567	28/18670	0.000162741	0.00327592	0.0024052	ESR1/FOXA1/AR/WNT5A/BMP4/SOX9	6
GO:0040014	regulation of multicellular organism growth	9/567	66/18670	0.000163304	0.00327592	0.0024052	BCL2/STC2/NIPBL/STAT5B/STAT3/NPY1R/GAMT/CACNA2D2/PLAC8	9
GO:0035107	appendage morphogenesis	14/567	148/18670	0.000170547	0.00336451	0.00247025	CREBBP/GLI3/NIPBL/LEF1/TBX3/ATRX/WNT5A/BMPR1B/SEMA3C/BMP4/GJA1/ZBTB16/SOX9/TFAP2B	14
GO:0035108	limb morphogenesis	14/567	148/18670	0.000170547	0.00336451	0.00247025	CREBBP/GLI3/NIPBL/LEF1/TBX3/ATRX/WNT5A/BMPR1B/SEMA3C/BMP4/GJA1/ZBTB16/SOX9/TFAP2B	14
GO:0002573	myeloid leukocyte differentiation	17/567	204/18670	0.000171047	0.00336451	0.00247025	GATA3/NF1/CCL19/RUNX1/INPP5D/PIK3R1/LEF1/RASSF2/EVI2B/HCLS1/RARA/CSF1R/CD74/BATF/BMP4/KIT/FOS	17
GO:0035265	organ growth	17/567	204/18670	0.000171047	0.00336451	0.00247025	BCL2/ESR1/AR/TGFBR3/UBE3A/COL14A1/RARA/SLC6A4/CACNA2D2/COL6A3/PDGFRB/MATN3/COL6A1/PAK1/ERBB4/GJA1/SOX9	17
GO:0007044	cell-substrate junction assembly	11/567	97/18670	0.000172436	0.00336451	0.00247025	BCL2/MACF1/CLASP2/EPB41L5/LAMA3/DLC1/IQGAP1/COL16A1/DST/APOD/KRT14	11
GO:0120162	positive regulation of cold-induced thermogenesis	11/567	97/18670	0.000172436	0.00336451	0.00247025	OGT/JAK2/IGF1R/PER2/PRKAB1/STAT6/ESRRG/PRLR/GATM/PLAC8/GJA1	11
GO:0150115	cell-substrate junction organization	11/567	97/18670	0.000172436	0.00336451	0.00247025	BCL2/MACF1/CLASP2/EPB41L5/LAMA3/DLC1/IQGAP1/COL16A1/DST/APOD/KRT14	11
GO:0072210	metanephric nephron development	7/567	40/18670	0.000179111	0.00348117	0.0025559	LAMB2/PDGFRB/BMP4/STAT1/CITED1/SOX9/TFAP2B	7
GO:0007178	transmembrane receptor protein serine/threonine kinase signaling pathway	24/567	349/18670	0.000181197	0.00350805	0.00257564	CREBBP/TGFB3/SORL1/FMOD/LEF1/CILP/TGFBR3/LRP2/BMPR2/PCSK6/NUMA1/WNT5A/ZNF423/DAB2/BMPR1B/RBPMS/CLDN5/BMP4/COL3A1/ASPN/CITED1/FOS/COL1A2/TFAP2B	24
GO:0050679	positive regulation of epithelial cell proliferation	17/567	206/18670	0.000192268	0.00370803	0.00272246	NF1/AR/MST1/STAT3/HPN/SEMA5A/GLUL/THBS4/BMPR2/CXCL12/WNT5A/CCL5/AGTR1/CCND1/EGR3/BMP4/SOX9	17
GO:0048754	branching morphogenesis of an epithelial tube	14/567	150/18670	0.000196449	0.00377408	0.00277096	BCL2/ESR1/GLI3/BTRC/LEF1/FOXA1/AR/PGR/TBX3/WNT5A/PAK1/BMP4/CITED1/SOX9	14
GO:0042509	regulation of tyrosine phosphorylation of STAT protein	10/567	83/18670	0.000204745	0.00390344	0.00286594	IL6ST/JAK2/FLT3/STAT3/HCLS1/CCL5/CSF1R/HPX/ERBB4/KIT	10
GO:2000106	regulation of leukocyte apoptotic process	10/567	83/18670	0.000204745	0.00390344	0.00286594	CCL19/CD3G/CXCL12/HCLS1/WNT5A/CCL5/CD74/CCL21/PIP/BMP4	10
GO:0002363	alpha-beta T cell lineage commitment	5/567	19/18670	0.000207235	0.00393589	0.00288976	BCL2/STAT3/STAT6/LY9/BATF	5
GO:0061005	cell differentiation involved in kidney development	8/567	54/18670	0.000209234	0.00395881	0.00290659	LAMB2/GATA3/GLI3/JAG1/IQGAP1/BMP4/STAT1/CITED1	8
GO:0050670	regulation of lymphocyte proliferation	17/567	208/18670	0.00021575	0.0040514	0.00297457	IL6ST/PTPN6/BCL2/PYCARD/CCL19/INPP5D/CD3E/CD6/ZAP70/VAV3/RAC2/IRF1/CCL5/CD74/BMP4/PTPRC/VTCN1	17
GO:0090276	regulation of peptide hormone secretion	17/567	208/18670	0.00021575	0.0040514	0.00297457	JAK2/ABAT/ITPR2/ADRA2A/PER2/GLUD1/CACNA1D/GLUL/IRS1/TRPM4/ABCC8/CCL5/CACNA2D2/MYRIP/GJA1/GRP/TFAP2B	17
GO:0031589	cell-substrate adhesion	24/567	354/18670	0.000224036	0.00419124	0.00307724	LAMB2/BCL2/MACF1/JAK2/NF1/RASA1/CD3E/CLASP2/PIK3R1/RAC2/ABI3BP/AGR2/EPB41L5/VWF/CD44/FBLN1/DLC1/JAG1/IQGAP1/NEDD9/COL16A1/CCL21/COL3A1/APOD	24
GO:0008154	actin polymerization or depolymerization	17/567	209/18670	0.0002284	0.00424111	0.00311386	SPTAN1/ADD1/VILL/PYCARD/JAK2/GAS7/RASA1/FCHSD2/WAS/CAP2/PRKCD/SEMA5A/CXCL12/HCLS1/ELN/CCL21/ENAH	17
GO:0032944	regulation of mononuclear cell proliferation	17/567	209/18670	0.0002284	0.00424111	0.00311386	IL6ST/PTPN6/BCL2/PYCARD/CCL19/INPP5D/CD3E/CD6/ZAP70/VAV3/RAC2/IRF1/CCL5/CD74/BMP4/PTPRC/VTCN1	17
GO:0032388	positive regulation of intracellular transport	18/567	229/18670	0.000230991	0.00427128	0.00313601	PCM1/VAMP2/TPR/BCL2/GLI3/SORL1/RBM22/PIK3R1/RAC2/PDZK1/PRKCD/HCLS1/NUMA1/DAB2/YWHAE/PMAIP1/PAK1/ABLIM3	18
GO:0060759	regulation of response to cytokine stimulus	16/567	190/18670	0.000233814	0.00427128	0.00313601	PTPN6/TRIM44/ELF1/PIAS1/PYCARD/JAK2/IKBKB/RUNX1/ADAR/WNT5A/CCL5/CD74/BIRC3/HPX/PTPRC/STAT1	16
GO:0060433	bronchus development	4/567	11/18670	0.000234301	0.00427128	0.00313601	AGR2/BMP4/SPDEF/SOX9	4
GO:0060736	prostate gland growth	4/567	11/18670	0.000234301	0.00427128	0.00313601	ESR1/AR/UBE3A/SOX9	4
GO:0072310	glomerular epithelial cell development	4/567	11/18670	0.000234301	0.00427128	0.00313601	LAMB2/JAG1/IQGAP1/BMP4	4
GO:0045165	cell fate commitment	20/567	271/18670	0.000246277	0.00447329	0.00328432	GATA3/BCL2/GLI3/RORC/FOXA1/AR/STAT3/STAT6/LY9/TBX3/NR2F2/JAG1/WNT5A/RARA/BATF/BCL11B/BMP4/SPDEF/ERBB4/SOX9	20
GO:0007565	female pregnancy	16/567	192/18670	0.000263344	0.00476595	0.0034992	BCL2/ESR1/TGFB3/STC2/ARHGDIB/AR/PGR/NR2F2/FBLN1/BMPR2/RARA/COL16A1/RLN2/PRLR/GJA1/FOS	16
GO:0002577	regulation of antigen processing and presentation	5/567	20/18670	0.00026945	0.00482402	0.00354183	PYCARD/CCL19/WAS/CD74/CCL21	5
GO:0033630	positive regulation of cell adhesion mediated by integrin	5/567	20/18670	0.00026945	0.00482402	0.00354183	PTPN6/CD3E/CCL5/CCL21/CXCL13	5
GO:0043369	CD4-positive or CD8-positive, alpha-beta T cell lineage commitment	5/567	20/18670	0.00026945	0.00482402	0.00354183	BCL2/STAT3/STAT6/LY9/BATF	5
GO:0031295	T cell costimulation	8/567	56/18670	0.000270876	0.00483224	0.00354787	PTPN6/CCL19/CD3E/PIK3R1/LCK/CCL21/ICOS/PAK1	8
GO:0007260	tyrosine phosphorylation of STAT protein	10/567	86/18670	0.000274826	0.00486861	0.00357457	IL6ST/JAK2/FLT3/STAT3/HCLS1/CCL5/CSF1R/HPX/ERBB4/KIT	10
GO:0030900	forebrain development	25/567	381/18670	0.000274864	0.00486861	0.00357457	PCM1/BTG2/NUMB/NIN/NF1/GLI3/SYNE2/LEF1/NCOA1/LRP2/TBX3/NR2F2/DLC1/ATRX/SEMA5A/EFHC1/CXCL12/WNT5A/RARA/YWHAE/CSF1R/BCL11B/BMP4/COL3A1/ERBB4	25
GO:0046425	regulation of receptor signaling pathway via JAK-STAT	13/567	137/18670	0.000279738	0.00493742	0.00362509	IL6ST/JAK2/FLT3/STAT3/HCLS1/IL10RA/CCL5/CSF1R/PRLR/HPX/PTPRC/ERBB4/KIT	13
GO:0051056	regulation of small GTPase mediated signal transduction	23/567	338/18670	0.000285365	0.00501532	0.00368229	ARHGEF3/PSD3/OGT/JAK2/F2RL2/ARHGDIB/FBP1/NF1/RASGRP1/RASA1/PSD4/ARHGAP19/VAV3/RAC2/ARHGAP25/IQSEC1/GPR18/ARHGAP15/DLC1/ARHGEF6/PDGFRB/RHOB/COL3A1	23
GO:0001953	negative regulation of cell-matrix adhesion	7/567	43/18670	0.000286159	0.00501532	0.00368229	NF1/RASA1/CLASP2/PIK3R1/DLC1/JAG1/APOD	7
GO:0070371	ERK1 and ERK2 cascade	22/567	317/18670	0.000292877	0.00508768	0.00373541	PTPN6/PYCARD/CCL19/RASGRP1/FLT3/GNAI2/CD44/CCL22/FBLN1/CCL5/CSF1R/RAMP3/CD74/PDGFRB/CCL21/SEMA6A/BMP4/PTPRC/ERBB4/KIT/DUSP4/SOX9	22
GO:0072089	stem cell proliferation	12/567	120/18670	0.00029317	0.00508768	0.00373541	NUMB/NF1/GLI3/RUNX1/ABCB1/LEF1/TBX3/FBLN1/CX3CR1/WNT5A/PTPRC/CITED1	12
GO:0043547	positive regulation of GTPase activity	26/567	405/18670	0.000293343	0.00508768	0.00373541	RABEP1/ARHGDIB/NF1/CCL19/RASGRP1/RASA1/ARHGAP19/DOCK10/VAV3/PKP4/ARHGAP25/IQSEC1/SEMA4D/ARHGAP15/CCL22/RGS5/DLC1/PLXNB1/ARHGEF6/TBC1D8/WNT5A/IQGAP1/CCL5/NEDD9/CCL21/CXCL13	26
GO:1902230	negative regulation of intrinsic apoptotic signaling pathway in response to DNA damage	6/567	31/18670	0.000294386	0.0050881	0.00373572	BCL2/MUC1/CD44/USP47/CXCL12/CD74	6
GO:0048588	developmental cell growth	18/567	234/18670	0.000300858	0.00518203	0.00380469	LAMB2/MACF1/CYFIP2/NIN/NEDD4L/SEMA4D/SYT17/SEMA5A/BMPR2/CXCL12/WNT5A/IQGAP1/SEMA6A/SEMA3C/PAK1/ALCAM/FLRT3/SOX9	18
GO:0031294	lymphocyte costimulation	8/567	57/18670	0.000306846	0.00526699	0.00386707	PTPN6/CCL19/CD3E/PIK3R1/LCK/CCL21/ICOS/PAK1	8
GO:0071559	response to transforming growth factor beta	19/567	255/18670	0.000309587	0.00529585	0.00388826	CREBBP/TGFB3/FMOD/CILP/EPB41L5/TGFBR3/BMPR2/CX3CR1/WNT5A/DAB2/BMPR1B/MXRA5/CLDN5/COL3A1/ASPN/CITED1/FOS/SOX9/COL1A2	19
GO:0070374	positive regulation of ERK1 and ERK2 cascade	17/567	215/18670	0.000318726	0.00535815	0.00393399	PYCARD/CCL19/RASGRP1/FLT3/GNAI2/CD44/CCL22/CCL5/CSF1R/RAMP3/CD74/PDGFRB/CCL21/BMP4/PTPRC/ERBB4/KIT	17
GO:0007204	positive regulation of cytosolic calcium ion concentration	22/567	319/18670	0.000319488	0.00535815	0.00393399	PTPN6/BCL2/ESR1/P2RX4/JAK2/F2RL2/CCL19/ITPR2/CXCR3/GPR18/CACNA1D/CD19/CX3CR1/LCK/TRPM4/RAMP3/AGTR1/CCL21/CXCL9/PTPRC/CXCL13/GJA1	22
GO:0030593	neutrophil chemotaxis	11/567	104/18670	0.000319559	0.00535815	0.00393399	CCL19/VAV3/RAC2/CCL22/THBS4/CCL5/CD74/CCL21/CSF3R/CXCL9/CXCL13	11
GO:0046822	regulation of nucleocytoplasmic transport	11/567	104/18670	0.000319559	0.00535815	0.00393399	TPR/NF1/GLI3/RBM22/PIK3R1/SUPT6H/PRKCD/HCLS1/YWHAE/BMP4/APOD	11
GO:0071887	leukocyte apoptotic process	11/567	104/18670	0.000319559	0.00535815	0.00393399	CCL19/GLI3/CD3G/CXCL12/HCLS1/WNT5A/CCL5/CD74/CCL21/PIP/BMP4	11
GO:0061035	regulation of cartilage development	9/567	72/18670	0.000319665	0.00535815	0.00393399	GLI3/FRZB/BMPR2/WNT5A/RARA/BMPR1B/BMP4/ZBTB16/SOX9	9
GO:0060537	muscle tissue development	26/567	408/18670	0.000328571	0.00548901	0.00403007	BTG2/BCL2/NF1/FLNB/LEF1/ERBB3/DDX17/TGFBR3/LRP2/TBX3/NR2F2/WNT5A/RARA/EEF2/ELN/PDGFRB/SEMA3C/DSP/PAK1/BMP4/COL3A1/ERBB4/MYBPC1/GJA1/FOS/SOX9	26
GO:0035850	epithelial cell differentiation involved in kidney development	7/567	44/18670	0.000331498	0.00548938	0.00403034	LAMB2/GATA3/JAG1/IQGAP1/BMP4/STAT1/CITED1	7
GO:1902667	regulation of axon guidance	7/567	44/18670	0.000331498	0.00548938	0.00403034	SEMA4D/SEMA5A/BMPR2/CXCL12/WNT5A/SEMA6A/SEMA3C	7
GO:0070098	chemokine-mediated signaling pathway	10/567	88/18670	0.00033189	0.00548938	0.00403034	CCL19/STK39/CXCR3/CCL22/CXCL12/CX3CR1/CCL5/CCL21/CXCL9/CXCL13	10
GO:0060391	positive regulation of SMAD protein signal transduction	4/567	12/18670	0.00034303	0.0056363	0.00413822	TGFB3/DAB2/RBPMS/BMP4	4
GO:0070486	leukocyte aggregation	4/567	12/18670	0.00034303	0.0056363	0.00413822	ZAP70/RAC2/SEMA4D/CD44	4
GO:2000810	regulation of bicellular tight junction assembly	5/567	21/18670	0.000344874	0.00564803	0.00414683	IKBKB/RUNX1/PRKCH/CLDN5/GJA1	5
GO:0071375	cellular response to peptide hormone stimulus	22/567	321/18670	0.000348198	0.00568382	0.00417311	VAMP2/NFKB1/OGT/CISH/JAK2/STAT5B/SORL1/PIK3R1/IGF1R/GNAI2/PTPRE/STAT3/STAT6/ADCY9/PRKCD/IRS1/OSBPL8/AGTR1/PRLR/PAK1/RAB31/STAT1	22
GO:0003176	aortic valve development	6/567	32/18670	0.000353113	0.00571729	0.00419768	GATA3/JAG1/BMPR2/ELN/BMP4/SOX9	6
GO:0002312	B cell activation involved in immune response	9/567	73/18670	0.000354974	0.00571729	0.00419768	PARP3/DOCK10/ITM2A/STAT6/SUPT6H/PLCL2/CD19/BATF/PTPRC	9
GO:0043627	response to estrogen	9/567	73/18670	0.000354974	0.00571729	0.00419768	GATA3/ESR1/TGFB3/GLI3/F7/RARA/PDGFRB/CCND1/CITED1	9
GO:0060350	endochondral bone morphogenesis	9/567	73/18670	0.000354974	0.00571729	0.00419768	COL14A1/BMPR2/RARA/BMPR1B/COL6A3/MATN3/COL6A1/BMP4/SOX9	9
GO:0070372	regulation of ERK1 and ERK2 cascade	21/567	300/18670	0.000355972	0.00571729	0.00419768	PTPN6/PYCARD/CCL19/RASGRP1/FLT3/GNAI2/CD44/CCL22/FBLN1/CCL5/CSF1R/RAMP3/CD74/PDGFRB/CCL21/SEMA6A/BMP4/PTPRC/ERBB4/KIT/DUSP4	21
GO:0046578	regulation of Ras protein signal transduction	18/567	238/18670	0.000369334	0.00591289	0.00434129	ARHGEF3/PSD3/OGT/JAK2/F2RL2/ARHGDIB/FBP1/NF1/RASGRP1/RASA1/PSD4/VAV3/IQSEC1/GPR18/DLC1/ARHGEF6/PDGFRB/COL3A1	18
GO:0001837	epithelial to mesenchymal transition	13/567	141/18670	0.000370641	0.00591487	0.00434274	TGFB3/CLASP2/LEF1/FOXA1/DDX17/EPB41L5/HPN/TGFBR3/JAG1/WNT5A/DAB2/BMP4/SOX9	13
GO:0016064	immunoglobulin mediated immune response	17/567	218/18670	0.000374494	0.00595731	0.00437391	PARP3/PTPN6/INPP5D/STAT6/SUPT6H/C5/PRKCD/C7/CD19/CR2/HLA-DQB1/CD74/BATF/HPX/SERPING1/PTPRC/C1S	17
GO:0009615	response to virus	22/567	323/18670	0.000379144	0.00601214	0.00441416	GATA3/BCL2/TRIM44/PYCARD/CCL19/IKBKB/ADAR/TRIM38/DDX17/ZMYND11/CCL22/APOBEC3G/CXCL12/IRF1/CCL5/BNIP3L/BIRC3/IFITM1/PMAIP1/CXCL9/PTPRC/STAT1	22
GO:0030851	granulocyte differentiation	6/567	33/18670	0.000420619	0.00662774	0.00486614	RUNX1/INPP5D/LEF1/EVI2B/HCLS1/RARA	6
GO:0032633	interleukin-4 production	6/567	33/18670	0.000420619	0.00662774	0.00486614	GATA3/CD3E/ITK/LEF1/RARA/VTCN1	6
GO:0032386	regulation of intracellular transport	24/567	370/18670	0.000427303	0.00671188	0.00492791	PCM1/VAMP2/TPR/BCL2/NF1/GLI3/SORL1/RBM22/PIK3R1/RAC2/PDZK1/SUPT6H/PRKCD/LCP1/HCLS1/NUMA1/BNIP3L/DAB2/YWHAE/PMAIP1/PAK1/ABLIM3/BMP4/APOD	24
GO:0046883	regulation of hormone secretion	19/567	262/18670	0.000433961	0.00673121	0.00494211	MYB/JAK2/ABAT/ITPR2/ADRA2A/PER2/GLUD1/CACNA1D/GLUL/IRS1/TRPM4/ABCC8/CCL5/CACNA2D2/AGTR1/MYRIP/GJA1/GRP/TFAP2B	19
GO:0046628	positive regulation of insulin receptor signaling pathway	5/567	22/18670	0.000435239	0.00673121	0.00494211	SORL1/GNAI2/IRS1/OSBPL8/PAK1	5
GO:0060390	regulation of SMAD protein signal transduction	5/567	22/18670	0.000435239	0.00673121	0.00494211	TGFB3/CILP/DAB2/RBPMS/BMP4	5
GO:0060487	lung epithelial cell differentiation	5/567	22/18670	0.000435239	0.00673121	0.00494211	FOXA1/KLF2/AGR2/SPDEF/SOX9	5
GO:0033143	regulation of intracellular steroid hormone receptor signaling pathway	9/567	75/18670	0.000435272	0.00673121	0.00494211	ESR1/NCOR1/RUNX1/CRY2/FOXA1/AR/NCOR2/DAB2/PAK1	9
GO:0019724	B cell mediated immunity	17/567	221/18670	0.000438505	0.00675328	0.00495831	PARP3/PTPN6/INPP5D/STAT6/SUPT6H/C5/PRKCD/C7/CD19/CR2/HLA-DQB1/CD74/BATF/HPX/SERPING1/PTPRC/C1S	17
GO:0050919	negative chemotaxis	7/567	46/18670	0.000439403	0.00675328	0.00495831	SEMA4D/FLRT2/SEMA5A/WNT5A/SEMA6A/SEMA3C/FLRT3	7
GO:0044706	multi-multicellular organism process	17/567	222/18670	0.000461842	0.00707638	0.00519553	BCL2/ESR1/TGFB3/STC2/ARHGDIB/AR/PGR/NR2F2/FBLN1/BMPR2/RARA/SLC6A4/COL16A1/RLN2/PRLR/GJA1/FOS	17
GO:0001676	long-chain fatty acid metabolic process	11/567	109/18670	0.000479859	0.00727597	0.00534207	HSD17B4/LTA4H/FAAH/ALOX5/ELOVL2/PTGDS/EPHX2/ACSL5/ELOVL5/PLA2G10/SLC27A2	11
GO:0072009	nephron epithelium development	11/567	109/18670	0.000479859	0.00727597	0.00534207	LAMB2/GATA3/BCL2/GLI3/JAG1/IQGAP1/BMP4/STAT1/CITED1/SOX9/TFAP2B	11
GO:0030500	regulation of bone mineralization	9/567	76/18670	0.000480694	0.00727597	0.00534207	TGFB3/BCOR/BMPR2/TRPM4/BMPR1B/BMP4/OMD/GJA1/SOX9	9
GO:0060411	cardiac septum morphogenesis	9/567	76/18670	0.000480694	0.00727597	0.00534207	TGFBR3/LRP2/TBX3/JAG1/BMPR2/WNT5A/RARA/SEMA3C/BMP4	9
GO:0045444	fat cell differentiation	17/567	223/18670	0.000486241	0.00733768	0.00538739	GATA3/ASXL2/PIAS1/NIPBL/RORC/PER2/FRZB/ALDH6A1/RUNX1T1/JAG1/WNT5A/TRPM4/OSBPL8/CCND1/PLAC8/ZBTB16/TFAP2B	17
GO:0070670	response to interleukin-4	6/567	34/18670	0.000497786	0.00748928	0.00549869	GATA3/IL2RG/LEF1/STAT6/IMPDH2/CITED1	6
GO:0046638	positive regulation of alpha-beta T cell differentiation	7/567	47/18670	0.000502966	0.00753509	0.00553233	MYB/CCL19/GLI3/RUNX1/ZAP70/RARA/ZBTB16	7
GO:0046879	hormone secretion	21/567	308/18670	0.000503848	0.00753509	0.00553233	GATA3/MYB/JAK2/ABAT/ITPR2/ADRA2A/PER2/GLUD1/TBX3/CACNA1D/GLUL/IRS1/TRPM4/ABCC8/CCL5/CACNA2D2/AGTR1/MYRIP/GJA1/GRP/TFAP2B	21
GO:0001655	urogenital system development	22/567	330/18670	0.000507227	0.00756299	0.00555281	LAMB2/GATA3/BCL2/ESR1/NF1/GLI3/NIPBL/FOXA1/AR/UBE3A/JAG1/WNT5A/RARA/IQGAP1/AGTR1/PDGFRB/BMP4/STAT1/CITED1/ZBTB16/SOX9/TFAP2B	22
GO:0042098	T cell proliferation	15/567	184/18670	0.000511998	0.0076114	0.00558835	IL6ST/PTPN6/PYCARD/CCL19/CD3E/CD6/ZAP70/RAC2/BTN3A1/IRF1/CCL5/BMP4/PTPRC/GJA1/VTCN1	15
GO:0007589	body fluid secretion	10/567	93/18670	0.000519041	0.0076932	0.00564841	ATP7B/AGR2/NCOR2/STK39/NCOA1/SYTL2/CCND1/PRLR/ERBB4/GJA1	10
GO:0001649	osteoblast differentiation	17/567	225/18670	0.000538387	0.00795633	0.0058416	IL6ST/HSD17B4/NF1/GLI3/LEF1/ADAR/SEMA4D/RASSF2/JAG1/BMPR2/TRPM4/BMPR1B/IFITM1/COL6A1/BMP4/CITED1/GJA1	17
GO:0060479	lung cell differentiation	5/567	23/18670	0.000542355	0.00799134	0.0058673	FOXA1/KLF2/AGR2/SPDEF/SOX9	5
GO:0009880	embryonic pattern specification	8/567	62/18670	0.000549893	0.00807858	0.00593135	EPB41L5/MEOX1/TBX3/PCSK6/WNT5A/ERBB4/CITED1/ZBTB16	8
GO:0070167	regulation of biomineral tissue development	10/567	94/18670	0.000565368	0.00825735	0.00606261	TGFB3/BCOR/BMPR2/TRPM4/BMPR1B/BMP4/ASPN/OMD/GJA1/SOX9	10
GO:0110149	regulation of biomineralization	10/567	94/18670	0.000565368	0.00825735	0.00606261	TGFB3/BCOR/BMPR2/TRPM4/BMPR1B/BMP4/ASPN/OMD/GJA1/SOX9	10
GO:0002063	chondrocyte development	7/567	48/18670	0.00057364	0.00832945	0.00611555	COL14A1/BMPR2/BMPR1B/COL6A3/MATN3/COL6A1/SOX9	7
GO:0007595	lactation	7/567	48/18670	0.00057364	0.00832945	0.00611555	ATP7B/NCOR2/NCOA1/CCND1/PRLR/ERBB4/GJA1	7
GO:0050678	regulation of epithelial cell proliferation	24/567	378/18670	0.000579562	0.00839105	0.00616078	GATA3/NF1/AR/MST1/STAT3/HPN/TGFBR3/PGR/NR2F2/SEMA5A/GLUL/THBS4/BMPR2/CXCL12/WNT5A/CCL5/AGTR1/CCND1/BCL11B/EGR3/BMP4/STAT1/GJA1/SOX9	24
GO:0003279	cardiac septum development	11/567	112/18670	0.000604922	0.00871265	0.0063969	GATA3/TGFBR3/AP2B1/LRP2/TBX3/JAG1/BMPR2/WNT5A/RARA/SEMA3C/BMP4	11
GO:0030073	insulin secretion	16/567	207/18670	0.000607008	0.00871265	0.0063969	JAK2/ABAT/ITPR2/ADRA2A/PER2/GLUD1/CACNA1D/GLUL/IRS1/TRPM4/ABCC8/CCL5/CACNA2D2/MYRIP/GJA1/TFAP2B	16
GO:0070555	response to interleukin-1	16/567	207/18670	0.000607008	0.00871265	0.0063969	NFKB1/PYCARD/CCL19/IKBKB/BTRC/PSME1/IGBP1/KLF2/RPS6KA5/NFKBIA/CCL22/CCL5/CCL21/GBP2/CITED1/SOX9	16
GO:0050671	positive regulation of lymphocyte proliferation	12/567	130/18670	0.000609729	0.00872664	0.00640717	IL6ST/BCL2/PYCARD/CCL19/CD3E/CD6/ZAP70/VAV3/CCL5/CD74/PTPRC/VTCN1	12
GO:0046637	regulation of alpha-beta T cell differentiation	8/567	63/18670	0.000613414	0.00872798	0.00640815	GATA3/MYB/CCL19/GLI3/RUNX1/ZAP70/RARA/ZBTB16	8
GO:0060337	type I interferon signaling pathway	10/567	95/18670	0.000615065	0.00872798	0.00640815	PTPN6/TYK2/ADAR/WNT5A/IRF1/IFI35/IRF8/IFITM1/GBP2/STAT1	10
GO:0071357	cellular response to type I interferon	10/567	95/18670	0.000615065	0.00872798	0.00640815	PTPN6/TYK2/ADAR/WNT5A/IRF1/IFI35/IRF8/IFITM1/GBP2/STAT1	10
GO:0002706	regulation of lymphocyte mediated immunity	13/567	149/18670	0.000629274	0.00888624	0.00652435	PARP3/PTPN6/GATA3/RASGRP1/STAT6/CD1C/SH2D1A/SUPT6H/IL18R1/WAS/TRPM4/HPX/PTPRC	13
GO:0021537	telencephalon development	18/567	249/18670	0.000631555	0.00888624	0.00652435	BTG2/NUMB/NIN/NF1/GLI3/SYNE2/LEF1/NCOA1/EFHC1/CXCL12/WNT5A/RARA/YWHAE/CSF1R/BCL11B/BMP4/COL3A1/ERBB4	18
GO:0071560	cellular response to transforming growth factor beta stimulus	18/567	249/18670	0.000631555	0.00888624	0.00652435	CREBBP/TGFB3/FMOD/CILP/EPB41L5/TGFBR3/BMPR2/CX3CR1/WNT5A/DAB2/BMPR1B/CLDN5/COL3A1/ASPN/CITED1/FOS/SOX9/COL1A2	18
GO:0090287	regulation of cellular response to growth factor stimulus	20/567	292/18670	0.000641738	0.00900417	0.00661093	GATA3/CREBBP/HHEX/CYFIP2/TGFB3/SORL1/TGFBR3/LRP2/BMPR2/PCSK6/NUMA1/WNT5A/ZNF423/DAB2/SEMA6A/BMP4/ASPN/CXCL13/CITED1/TFAP2B	20
GO:0030857	negative regulation of epithelial cell differentiation	7/567	49/18670	0.000651982	0.00906227	0.00665359	FRZB/TBX3/JAG1/CCND1/STAT1/CITED1/SOX9	7
GO:0048546	digestive tract morphogenesis	7/567	49/18670	0.000651982	0.00906227	0.00665359	BCL2/GLI3/NIPBL/AGR2/EPB41L5/WNT5A/BMP4	7
GO:0048640	negative regulation of developmental growth	11/567	113/18670	0.000652208	0.00906227	0.00665359	STC2/SEMA4D/SEMA5A/WNT5A/SLC6A4/SEMA6A/SEMA3C/PAK1/BMP4/PLAC8/GJA1	11
GO:0032946	positive regulation of mononuclear cell proliferation	12/567	131/18670	0.000653137	0.00906227	0.00665359	IL6ST/BCL2/PYCARD/CCL19/CD3E/CD6/ZAP70/VAV3/CCL5/CD74/PTPRC/VTCN1	12
GO:0043374	CD8-positive, alpha-beta T cell differentiation	4/567	14/18670	0.00066089	0.00913254	0.00670518	BCL2/RUNX1/GPR18/IRF1	4
GO:0010951	negative regulation of endopeptidase activity	18/567	250/18670	0.000661858	0.00913254	0.00670518	CST3/SORL1/LEF1/IGBP1/SIAH2/CD44/USP47/C5/SERPINB1/WFDC2/CST7/YWHAE/COL6A3/BIRC3/SERPING1/CST1/SERPINA1/TFAP2B	18
GO:0090023	positive regulation of neutrophil chemotaxis	5/567	24/18670	0.000668114	0.00916822	0.00673138	CCL19/RAC2/THBS4/CD74/CCL21	5
GO:1900078	positive regulation of cellular response to insulin stimulus	5/567	24/18670	0.000668114	0.00916822	0.00673138	SORL1/GNAI2/IRS1/OSBPL8/PAK1	5
GO:0050922	negative regulation of chemotaxis	8/567	64/18670	0.000682728	0.00929537	0.00682473	SEMA4D/GPR18/C5/SEMA5A/WNT5A/SEMA6A/SEMA3C/CXCL13	8
GO:0010742	macrophage derived foam cell differentiation	6/567	36/18670	0.000684824	0.00929537	0.00682473	NFKB1/PRKCH/NFKBIA/AGTR1/PLA2G10/STAT1	6
GO:0060428	lung epithelium development	6/567	36/18670	0.000684824	0.00929537	0.00682473	FOXA1/KLF2/AGR2/BMP4/SPDEF/SOX9	6
GO:0090077	foam cell differentiation	6/567	36/18670	0.000684824	0.00929537	0.00682473	NFKB1/PRKCH/NFKBIA/AGTR1/PLA2G10/STAT1	6
GO:0030282	bone mineralization	11/567	114/18670	0.00070253	0.00942752	0.00692176	TGFB3/BCOR/BMPR2/TRPM4/BMPR1B/BMP4/ASPN/OMD/GJA1/SOX9/COL1A2	11
GO:0042035	regulation of cytokine biosynthetic process	11/567	114/18670	0.00070253	0.00942752	0.00692176	GATA3/NFKB1/JAK2/INPP5D/CD3E/STAT3/CX3CR1/WNT5A/IRF1/CD74/PTPRC	11
GO:0060349	bone morphogenesis	11/567	114/18670	0.00070253	0.00942752	0.00692176	TGFB3/GLI3/COL14A1/BMPR2/RARA/BMPR1B/COL6A3/MATN3/COL6A1/BMP4/SOX9	11
GO:0071772	response to BMP	14/567	170/18670	0.000703997	0.00942752	0.00692176	GATA3/SORL1/LEF1/TGFBR3/LRP2/BMPR2/PCSK6/NUMA1/WNT5A/ZNF423/BMPR1B/BMP4/SOX9/TFAP2B	14
GO:0071773	cellular response to BMP stimulus	14/567	170/18670	0.000703997	0.00942752	0.00692176	GATA3/SORL1/LEF1/TGFBR3/LRP2/BMPR2/PCSK6/NUMA1/WNT5A/ZNF423/BMPR1B/BMP4/SOX9/TFAP2B	14
GO:0061448	connective tissue development	19/567	273/18670	0.000716795	0.00957324	0.00702875	GLI3/SORL1/RORC/FOXA1/FRZB/CD44/COL14A1/BMPR2/WNT5A/RARA/TRPM4/BMPR1B/COL6A3/PDGFRB/MATN3/COL6A1/BMP4/ZBTB16/SOX9	19
GO:1990868	response to chemokine	10/567	97/18670	0.000725313	0.00963548	0.00707444	CCL19/STK39/CXCR3/CCL22/CXCL12/CX3CR1/CCL5/CCL21/CXCL9/CXCL13	10
GO:1990869	cellular response to chemokine	10/567	97/18670	0.000725313	0.00963548	0.00707444	CCL19/STK39/CXCR3/CCL22/CXCL12/CX3CR1/CCL5/CCL21/CXCL9/CXCL13	10
GO:0050768	negative regulation of neurogenesis	20/567	295/18670	0.000728983	0.00965854	0.00709138	PCM1/DICER1/NF1/GLI3/SORL1/CBFA2T2/CDK5RAP2/SEMA4D/STAT3/UBE3A/SEMA5A/JAG1/PLK2/WNT5A/SLC6A4/SEMA6A/SEMA3C/COL3A1/ERBB4/SOX9	20
GO:0009914	hormone transport	21/567	317/18670	0.000731595	0.0096675	0.00709796	GATA3/MYB/JAK2/ABAT/ITPR2/ADRA2A/PER2/GLUD1/TBX3/CACNA1D/GLUL/IRS1/TRPM4/ABCC8/CCL5/CACNA2D2/AGTR1/MYRIP/GJA1/GRP/TFAP2B	21
GO:0002931	response to ischemia	7/567	50/18670	0.00073857	0.00970831	0.00712791	BCL2/P2RX4/PER2/CX3CR1/EEF2/CSF1R/GJA1	7
GO:0070741	response to interleukin-6	7/567	50/18670	0.00073857	0.00970831	0.00712791	IL6ST/PTPRT/NFKB1/JAK2/STAT3/STAT1/CITED1	7
GO:0001654	eye development	23/567	362/18670	0.000741622	0.00972284	0.00713858	LAMB2/GATA3/BCL2/SALL2/NF1/GLI3/NIPBL/STAT3/IMPDH2/PDE6B/PFDN5/JAG1/BMPR2/WNT5A/RARA/BMPR1B/PDGFRB/BCL11B/BMP4/GJA1/SOX9/NDP/TFAP2B	23
GO:0046660	female sex differentiation	11/567	115/18670	0.000756039	0.0098859	0.00725831	BCL2/ESR1/DACH1/NRIP1/UBE3A/PGR/LRP2/TBX3/WNT5A/BMPR1B/KIT	11

## Sheet: KEGG.UP
Table S7_3. KEGG enrichment of upregulated genes ( p.adjust < 0.01) (high-risk group vs. low-risk group)
ID	Description	GeneRatio	BgRatio	pvalue	p.adjust	qvalue	Symbol	Count
hsa04110	Cell cycle	25/363	124/8105	1.49742e-10	4.32755e-08	3.68839e-08	CHEK1/MAD2L1/CCNB2/CCNA2/PTTG1/CDC20/HDAC2/BUB1/TTK/CCNE1/YWHAQ/CCNE2/CCNB1/CDKN2A/E2F5/ESPL1/E2F1/CDC25A/MYC/CDC25B/CDC6/E2F2/YWHAZ/MCM2/SFN	25
hsa01200	Carbon metabolism	22/363	115/8105	5.52081e-09	7.97756e-07	6.79931e-07	PGK1/PDHA1/SUCLG1/TALDO1/TKT/TPI1/MDH2/PFKL/G6PD/PSAT1/ENO1/SHMT2/PFKP/SDHA/ALDOC/PHGDH/GPI/MDH1/DLD/ALDOA/ME2/IDH2	22
hsa00270	Cysteine and methionine metabolism	13/363	50/8105	1.85144e-07	1.37802e-05	1.17449e-05	AMD1/GCLM/SRM/MDH2/PSAT1/AHCY/DNMT3B/LDHB/PHGDH/MDH1/BCAT1/LDHA/SMS	13
hsa05012	Parkinson disease	31/363	249/8105	1.9073e-07	1.37802e-05	1.17449e-05	PSMD7/PSMD14/UQCRB/UQCRH/CYC1/PSMB5/COX5A/PSMA7/VDAC2/ADRM1/PSMC1/PSMB2/TXN/COX4I1/COX7B/NDUFAB1/UCHL1/SDHA/PSMD2/ATF4/COX7A2/MFN1/PSMA4/PSMD8/BAX/GNAI1/UQCRFS1/TH/PSMD3/GPR37/CALML5	31
hsa01230	Biosynthesis of amino acids	15/363	75/8105	8.57129e-07	4.95421e-05	4.22249e-05	PGK1/TALDO1/TKT/TPI1/ASNS/PFKL/PSAT1/ENO1/SHMT2/PFKP/ALDOC/PHGDH/ALDOA/BCAT1/IDH2	15
hsa00010	Glycolysis / Gluconeogenesis	14/363	67/8105	1.14238e-06	5.50248e-05	4.68978e-05	PGK1/PDHA1/TPI1/PFKL/ENO1/PFKP/LDHB/PGM1/ALDOC/GPI/DLD/ALDOA/LDHA/ALDH3B2	14
hsa05230	Central carbon metabolism in cancer	14/363	70/8105	1.99564e-06	8.23913e-05	7.02224e-05	PDHA1/SLC7A5/PFKL/G6PD/SLC16A3/PFKP/LDHB/HRAS/LDHA/NRAS/MYC/SLC2A1/EGFR/IDH2	14
hsa03050	Proteasome	11/363	46/8105	4.05617e-06	0.000130662	0.000111363	PSMD7/PSMD14/PSMB5/PSMA7/ADRM1/PSMC1/PSMB2/PSMD2/PSMA4/PSMD8/PSMD3	11
hsa00030	Pentose phosphate pathway	9/363	30/8105	4.06904e-06	0.000130662	0.000111363	TALDO1/TKT/PFKL/G6PD/PFKP/PGM1/ALDOC/GPI/ALDOA	9
hsa05020	Prion disease	29/363	273/8105	1.2113e-05	0.000350065	0.000298362	PSMD7/PSMD14/UQCRB/UQCRH/CYC1/PSMB5/COX5A/PSMA7/VDAC2/ADRM1/PSMC1/PSMB2/COX4I1/COX7B/STIP1/NDUFAB1/SDHA/SOD1/PSMD2/ATF4/COX7A2/PSMA4/PSMD8/BAX/UQCRFS1/PSMD3/PRNP/CAV2/HSPA8	29
hsa04066	HIF-1 signaling pathway	16/363	109/8105	2.48047e-05	0.000651687	0.000555435	PGK1/EIF4EBP1/PDHA1/PFKL/ENO1/LTBR/PFKP/LDHB/ALDOC/ALDOA/LDHA/SLC2A1/EGFR/TFRC/HMOX1/PFKFB3	16
hsa04218	Cellular senescence	19/363	156/8105	6.43442e-05	0.00154962	0.00132075	EIF4EBP1/CHEK1/CCNB2/CCNA2/VDAC2/RHEB/MYBL2/CCNE1/CCNE2/CCNB1/HRAS/CDKN2A/E2F5/E2F1/NRAS/CDC25A/MYC/E2F2/CALML5	19
hsa00051	Fructose and mannose metabolism	8/363	33/8105	7.76536e-05	0.0017263	0.00147133	TPI1/PFKL/TSTA3/PFKP/ALDOC/ALDOA/AKR1B10/PFKFB3	8
hsa05016	Huntington disease	29/363	306/8105	0.000100655	0.00207781	0.00177092	PSMD7/PSMD14/UQCRB/UQCRH/CYC1/PSMB5/COX5A/PSMA7/TBPL1/POLR2F/VDAC2/ADRM1/PSMC1/PSMB2/COX4I1/HDAC2/COX7B/NDUFAB1/SDHA/SOD1/PSMD2/SOD2/COX7A2/AP2S1/PSMA4/PSMD8/BAX/UQCRFS1/PSMD3	29
hsa00020	Citrate cycle (TCA cycle)	7/363	30/8105	0.000283991	0.00547156	0.00466343	PDHA1/SUCLG1/MDH2/SDHA/MDH1/DLD/IDH2	7
hsa05166	Human T-cell leukemia virus 1 infection	22/363	219/8105	0.000310335	0.00560542	0.00477752	CHEK1/MAD2L1/CCNB2/CCNA2/TBPL1/PTTG1/VDAC2/CDC20/LTBR/RANBP1/CCNE1/CCNE2/HRAS/ATF4/CDKN2A/ESPL1/BAX/E2F1/NRAS/MYC/SLC2A1/E2F2	22
hsa05219	Bladder cancer	8/363	41/8105	0.000390441	0.0066375	0.00565716	HRAS/CDKN2A/E2F1/NRAS/MYC/EGFR/E2F2/CDH1	8

## Sheet: KEGG.DOWN
Table S7_4. KEGG enrichment of downregulated genes ( p.adjust < 0.01) (high-risk group vs. low-risk group)
ID	Description	GeneRatio	BgRatio	pvalue	p.adjust	qvalue	Symbol	Count
hsa04659	Th17 cell differentiation	23/345	107/8105	7.75337e-11	2.31826e-08	1.74655e-08	IL6ST/GATA3/NFKB1/JAK2/IKBKB/RUNX1/STAT5B/CD3E/TYK2/ZAP70/IL2RG/RORC/STAT3/CD3G/STAT6/NFKBIA/HLA-DQB1/RARA/LCK/CD3D/HLA-DQA1/STAT1/FOS	23
hsa04658	Th1 and Th2 cell differentiation	20/345	92/8105	1.11658e-09	1.66928e-07	1.25762e-07	GATA3/NFKB1/JAK2/IKBKB/STAT5B/CD3E/TYK2/ZAP70/IL2RG/CD3G/STAT6/STAT4/NFKBIA/JAG1/HLA-DQB1/LCK/CD3D/HLA-DQA1/STAT1/FOS	20
hsa04660	T cell receptor signaling pathway	19/345	104/8105	5.99911e-08	5.97912e-06	4.5046e-06	PTPN6/NFKB1/RASGRP1/IKBKB/CD3E/CD8A/ZAP70/PIK3R1/ITK/VAV3/CD3G/NFKBIA/LCK/LCP2/CD3D/ICOS/PAK1/PTPRC/FOS	19
hsa05221	Acute myeloid leukemia	15/345	67/8105	9.26815e-08	6.92794e-06	5.21943e-06	NFKB1/IKBKB/RUNX1/STAT5B/PIK3R1/FLT3/LEF1/PER2/STAT3/RUNX1T1/RARA/CSF1R/CCND1/KIT/ZBTB16	15
hsa04062	Chemokine signaling pathway	26/345	192/8105	1.36856e-07	8.18396e-06	6.1657e-06	NFKB1/JAK2/CCL19/IKBKB/CXCL14/STAT5B/PIK3R1/ITK/VAV3/GNAI2/RAC2/CXCR3/STAT3/ADCY9/NFKBIA/WAS/CCL22/PRKCD/CXCL12/CX3CR1/CCL5/CCL21/CXCL9/PAK1/STAT1/CXCL13	26
hsa05145	Toxoplasmosis	19/345	112/8105	2.04948e-07	1.02132e-05	7.69454e-06	LAMB2/BCL2/NFKB1/TGFB3/JAK2/IKBKB/TYK2/GNAI2/HSPA2/STAT3/NFKBIA/ALOX5/LAMA3/LAMA2/HLA-DQB1/IL10RA/BIRC3/HLA-DQA1/STAT1	19
hsa05340	Primary immunodeficiency	11/345	38/8105	3.03388e-07	1.2959e-05	9.76317e-06	RFX5/CD3E/CD8A/ZAP70/IL2RG/CD79A/CD19/LCK/CD3D/ICOS/PTPRC	11
hsa04640	Hematopoietic cell lineage	17/345	99/8105	7.58234e-07	2.82206e-05	2.12611e-05	CD3E/CD8A/CD37/FLT3/CD2/CD44/CD3G/CD1C/CD19/CR2/HLA-DQB1/CSF1R/CD3D/CSF3R/ANPEP/HLA-DQA1/KIT	17
hsa05235	PD-L1 expression and PD-1 checkpoint pathway in cancer	16/345	89/8105	8.49449e-07	2.82206e-05	2.12611e-05	PTPN6/NFKB1/JAK2/RASGRP1/IKBKB/CD3E/ZAP70/PIK3R1/STAT3/CD3G/NFKBIA/LCK/CD3D/BATF/STAT1/FOS	16
hsa04151	PI3K-Akt signaling pathway	35/345	354/8105	2.38015e-06	7.11666e-05	5.36161e-05	EIF4B/LAMB2/BCL2/NFKB1/MYB/COL4A5/JAK2/IKBKB/CHAD/PPP2R2A/IL2RG/PIK3R1/FLT3/IGF1R/ERBB3/CCND2/VWF/MAGI1/LAMA3/LAMA2/THBS4/CD19/IRS1/YWHAE/CSF1R/COL6A3/PDGFRB/CSF3R/CCND1/PRLR/COL9A2/COL6A1/ERBB4/KIT/COL1A2	35
hsa05321	Inflammatory bowel disease	13/345	65/8105	2.65029e-06	7.20398e-05	5.42739e-05	GATA3/NFKB1/TGFB3/IL2RG/RORC/STAT3/STAT6/STAT4/IL18R1/TLR5/HLA-DQB1/HLA-DQA1/STAT1	13
hsa04061	Viral protein interaction with cytokine and cytokine receptor	16/345	100/8105	4.22324e-06	0.000105229	7.92784e-05	IL6ST/CCL19/CXCL14/IL2RG/CXCR3/IL18R1/CCL22/CXCL12/TNFSF10/CX3CR1/IL10RA/CCL5/CSF1R/CCL21/CXCL9/CXCL13	16
hsa04630	JAK-STAT signaling pathway	21/345	162/8105	4.60243e-06	0.000105856	7.97507e-05	IL6ST/PTPN6/BCL2/CREBBP/PIAS1/CISH/JAK2/STAT5B/TYK2/IL2RG/PIK3R1/STAT3/CCND2/STAT6/STAT4/IL10RA/PDGFRB/CSF3R/CCND1/PRLR/STAT1	21
hsa04917	Prolactin signaling pathway	13/345	70/8105	6.31655e-06	0.000134904	0.000101635	NFKB1/ESR1/CISH/JAK2/STAT5B/PIK3R1/STAT3/CCND2/IRF1/CCND1/PRLR/STAT1/FOS	13
hsa04662	B cell receptor signaling pathway	14/345	82/8105	7.78822e-06	0.000155245	0.00011696	PTPN6/NFKB1/IKBKB/INPP5D/PIK3R1/VAV3/RAC2/CD79A/CD79B/NFKBIA/CD19/CR2/IFITM1/FOS	14
hsa05162	Measles	18/345	139/8105	2.25488e-05	0.000421381	0.000317463	BCL2/NFKB1/IKBKB/STAT5B/CD3E/TYK2/IL2RG/PIK3R1/ADAR/HSPA2/STAT3/CCND2/CD3G/NFKBIA/CD3D/CCND1/STAT1/FOS	18
hsa04974	Protein digestion and absorption	15/345	103/8105	2.70714e-05	0.000476138	0.000358717	COL4A5/SLC7A8/COL14A1/ATP1B1/ELN/COL6A3/COL16A1/SLC1A1/COL9A2/COL6A1/COL15A1/COL3A1/CPA3/COL1A2/CPB1	15
hsa04510	Focal adhesion	22/345	201/8105	4.1699e-05	0.000692666	0.000521847	LAMB2/BCL2/COL4A5/FLNB/CHAD/PIK3R1/IGF1R/VAV3/RAC2/CCND2/VWF/LAMA3/LAMA2/THBS4/COL6A3/BIRC3/PDGFRB/CCND1/COL9A2/COL6A1/PAK1/COL1A2	22
hsa04933	AGE-RAGE signaling pathway in diabetic complications	14/345	100/8105	7.80932e-05	0.00122894	0.00092587	BCL2/NFKB1/COL4A5/TGFB3/JAK2/STAT5B/PIK3R1/STAT3/PRKCD/AGTR1/CCND1/COL3A1/STAT1/COL1A2	14
hsa04512	ECM-receptor interaction	12/345	88/8105	0.000323892	0.00484219	0.00364805	LAMB2/COL4A5/CHAD/VWF/CD44/LAMA3/LAMA2/THBS4/COL6A3/COL9A2/COL6A1/COL1A2	12
hsa05169	Epstein-Barr virus infection	20/345	202/8105	0.000363397	0.00517408	0.00389809	TRAF5/BCL2/NFKB1/IKBKB/CD3E/TYK2/PIK3R1/NCOR2/STAT3/CCND2/CD44/CD3G/NFKBIA/CD19/CR2/HLA-DQB1/CD3D/CCND1/HLA-DQA1/STAT1	20
hsa05222	Small cell lung cancer	12/345	92/8105	0.000491178	0.00667555	0.00502928	TRAF5/LAMB2/BCL2/NFKB1/COL4A5/IKBKB/PIK3R1/NFKBIA/LAMA3/LAMA2/BIRC3/CCND1	12
hsa04915	Estrogen signaling pathway	15/345	138/8105	0.000747154	0.009713	0.00731766	BCL2/ESR1/TFF1/ITPR2/PIK3R1/GNAI2/HSPA2/PGR/NCOA1/ADCY9/PRKCD/RARA/FOS/KRT14/KRT15	15
hsa05215	Prostate cancer	12/345	97/8105	0.000797509	0.00993564	0.00748539	BCL2/NFKB1/CREBBP/IKBKB/PIK3R1/IGF1R/LEF1/AR/PLAT/NFKBIA/PDGFRB/CCND1	12
